# Supplementary material for: Asymmetric Michael additions of α-cyanoacetates by soft Lewis acid/hard Brønsted acid catalysis: stereodivergency with bi- vs. monometallic catalysts
Source: Royal Society of Chemistry journal article supplement (doi:10.1039/c3sc50419k), 2013-01-01
Supplement: c3sc50419k.pdf [file c3sc50419k.pdf]

# **Asymmetric Michael Additions of $\alpha$ -Cyanoacetates by Soft Lewis Acid / Hard Brønsted Acid Catalysis: Stereodivergency with Bi- vs Monometallic Catalysts**

**Simon H. Eitel, Sascha Jautze, Wolfgang Frey, and René Peters\***

*Institut für Organische Chemie, Universität Stuttgart, Pfaffenwaldring 55, D-70569 Stuttgart, Germany.*

*Email: [rene.peters@oc.uni-stuttgart.de](mailto:rene.peters@oc.uni-stuttgart.de)*

## Table of Contents

|                                                                                                                                                                                                                                                                                                                                                                            |           |
|----------------------------------------------------------------------------------------------------------------------------------------------------------------------------------------------------------------------------------------------------------------------------------------------------------------------------------------------------------------------------|-----------|
| <b>TABLE OF CONTENTS</b> .....                                                                                                                                                                                                                                                                                                                                             | <b>2</b>  |
| <b>EXPERIMENTAL</b> .....                                                                                                                                                                                                                                                                                                                                                  | <b>6</b>  |
| <b>GENERAL PROCEDURES (GP)</b> .....                                                                                                                                                                                                                                                                                                                                       | <b>8</b>  |
| GENERAL PROCEDURE FOR THE FORMATION OF $\alpha$ -ARYL- $\alpha$ -CYANOACETATES <b>1</b> (GP1).....                                                                                                                                                                                                                                                                         | 8         |
| GENERAL PROCEDURE FOR THE FORMATION OF RACEMIC MICHAEL-ADDITION PRODUCTS <b>3</b> (GP2).....                                                                                                                                                                                                                                                                               | 8         |
| GENERAL PROCEDURE FOR THE CATALYTIC ASYMMETRIC MICHAEL-ADDITION (GP3).....                                                                                                                                                                                                                                                                                                 | 9         |
| GENERAL PROCEDURE FOR THE REDUCTION OF THE KETO GROUP IN THE MICHAEL-ADDITION PRODUCT <b>3</b> (GP4)<br>.....                                                                                                                                                                                                                                                              | 9         |
| GENERAL PROCEDURE FOR THE REDUCTIVE DEHALOGENATION OF MICHAEL-ADDITION PRODUCT <b>3</b> (GP5) .....                                                                                                                                                                                                                                                                        | 10        |
| <b>SYNTHESIS OF SILVER SALTS</b> .....                                                                                                                                                                                                                                                                                                                                     | <b>11</b> |
| SILVER(I)(BISTRIFLUOROMETHANE)SULFONIMIDE.....                                                                                                                                                                                                                                                                                                                             | 11        |
| <b>SYNTHESIS OF CYCLIC ENONES</b> .....                                                                                                                                                                                                                                                                                                                                    | <b>12</b> |
| 3-ETHOXY-5,5-DIMETHYL-2-CYCLOHEXEN-1-ONE .....                                                                                                                                                                                                                                                                                                                             | 12        |
| 5,5-DIMETHYL-2-CYCLOHEXEN-1-ONE ( <b>2D</b> ) .....                                                                                                                                                                                                                                                                                                                        | 12        |
| 3-BROMO-2,3-DIHYDRO-1 <i>H</i> -INDEN-1-ONE.....                                                                                                                                                                                                                                                                                                                           | 13        |
| 1 <i>H</i> -INDEN-1-ONE ( <b>2E</b> ) .....                                                                                                                                                                                                                                                                                                                                | 13        |
| <b>SYNTHESIS OF <math>\alpha</math>-ARYL-<math>\alpha</math>-CYANOACETATES</b> .....                                                                                                                                                                                                                                                                                       | <b>15</b> |
| <i>TERT</i> -BUTYL-2-CYANO-( <i>O</i> -FLUOROPHENYL)ACETATE ( <b>1K</b> ).....                                                                                                                                                                                                                                                                                             | 15        |
| <i>TERT</i> -BUTYL-2-CYANO-( <i>M</i> -FLUOROPHENYL)ACETATE ( <b>1L</b> ) .....                                                                                                                                                                                                                                                                                            | 15        |
| <i>TERT</i> -BUTYL-2-CYANO-(4-METHOXYPHENYL)ACETATE ( <b>1M</b> ) .....                                                                                                                                                                                                                                                                                                    | 16        |
| <b>ACTIVATION OF THE PRECATALYST [FBIP-CL]<sub>2</sub> AND [FIP-CL]<sub>2</sub> WITH AGO<sub>2</sub>CC<sub>3</sub>F<sub>7</sub> / ACETONITRILE</b><br>.....                                                                                                                                                                                                                | <b>17</b> |
| BIS(ACETONITRILE)[M-[(1 <i>S<sub>p</sub></i> ,1' <i>S<sub>p</sub></i> )-2,2'-BIS[(4 <i>R</i> ,5 <i>R</i> )-4,5-DIHYDRO-1-[(4-METHYLPHENYL)SULFONYL]-4,5-DIPHENYL-1 <i>H</i> -IMIDAZOL-2-YL- $\kappa$ N3]-1,1'-FERROCENDIYL- $\kappa$ C1: $\kappa$ C1']]BIS(HEPTAFLUOROBUTYRATO- $\kappa$ O)DI-PALLADIUM(II) ( <b>FBIP-O<sub>2</sub>CC<sub>3</sub>F<sub>7</sub></b> ) ..... | 17        |

(ACETONITRILE- $\kappa N$ )-(HEPTAFLUOROBUTYRATE- $\kappa O$ )[(1*S<sub>p</sub>*)-2-[(4*R*,5*R*)-4,5-DIHYDRO-1-[(4-METHYLPHENYL)SULFONYL]-4,5-DIPHENYL-1*H*-IMIDAZOL-2-YL- $\kappa N3$ ]-1',2',3',4',5'-PENTAPHENYLFERROCENYL- $\kappa C$ ]-PALLADIUM(II) (FIP-O<sub>2</sub>CC<sub>3</sub>F<sub>7</sub>)..... 18

## SYNTHESIS OF ENANTIOENRICHED MICHAEL-ADDITION PRODUCTS BY ASYMMETRIC

### CATALYSIS (3)..... 20

*TERT*-BUTYL-2-CYANO-2-(3-OXOCYCLOHEXYL)-2-PHENYLACETATE (3AA) ..... 20

*TERT*-BUTYL-2-CYANO-2-(3-OXOCYCLOHEXYL)-2-(3-(TRIFLUOROMETHYL)PHENYL)ACETATE (3BA) ..... 22

*TERT*-BUTYL-2-CYANO-2-(3-BROMOPHENYL)-2-(3-OXOCYCLOHEXYL)ACETATE (3CA)..... 24

*TERT*-BUTYL-2-CYANO-2-(3-CHLOROPHENYL)-2-(3-OXOCYCLOHEXYL)ACETATE (3DA)..... 25

*TERT*-BUTYL-2-CYANO-2-(3-METHOXYPHENYL)-2-(3-OXOCYCLOHEXYL)-ACETATE (3EA)..... 27

*TERT*-BUTYL-2-CYANO-2-(3-OXOCYCLOHEXYL)-2-(*M*-TOLYL)-ACETATE (3FA) ..... 29

*TERT*-BUTYL-2-CYANO-2-(4-FLUOROPHENYL)-2-(3-OXOCYCLOHEXYL)-ACETATE (3GA)..... 31

*TERT*-BUTYL-2-CYANO-2-(4-CHLOROPHENYL)-2-(3-OXOCYCLOHEXYL)-ACETATE (3HA) ..... 33

*TERT*-BUTYL-2-CYANO-2-(4-BROMOPHENYL)-2-(3-OXOCYCLOHEXYL)-ACETATE (3IA) ..... 35

*TERT*-BUTYL-2-CYANO-2-(3-OXOCYCLOHEXYL)-2-(*P*-TOLYL)-ACETATE (3JA) ..... 38

*TERT*-BUTYL-2-CYANO-2-(2-FLUOROPHENYL)-2-(3-OXOCYCLOHEXYL)-ACETATE (3KA) ..... 40

*TERT*-BUTYL-2-CYANO-2-(3-FLUOROPHENYL)-2-(3-OXOCYCLOHEXYL)-ACETATE (3LA) ..... 41

*TERT*-BUTYL-2-CYANO-2-(4-METHOXYPHENYL)-2-(3-OXOCYCLOHEXYL)-ACETATE (3MA) ..... 43

*TERT*-BUTYL-2-CYANO-2-(3-OXOCYCLOPENTYL)-2-PHENYLACETATE (3AB) ..... 44

*TERT*-BUTYL-2-CYANO-2-(3-OXOCYCLOHEPTYL)-2-PHENYLACETATE (3AC) ..... 46

*TERT*-BUTYL-2-CYANO-2-(3,3-DIMETHYL-5-OXOCYCLOHEXYL)-2-PHENYLACETATE (3AD) ..... 48

*TERT*-BUTYL-2-CYANO-2-(4-CHLOROPHENYL)-2-(3,3-DIMETHYL-5-OXOCYCLOHEXYL)ACETATE (3HD)..... 50

*TERT*-BUTYL-2-CYANO-2-(4-BROMOPHENYL)-2-(3,3-DIMETHYL-5-OXOCYCLOHEXYL)ACETATE (3ID) ..... 51

*TERT*-BUTYL-2-CYANO-2-(3-OXO-2,3-DIHYDRO-1*H*-INDEN-1-YL)-2-PHENYLACETATE (3AE)..... 53

ETHYL-2-CYANO-2-(3-OXOCYCLOHEXYL)-2-PHENYLACETATE (3A'A) ..... 55

*TERT*-BUTYL-2-CYANO-2-(3-HYDROXOCYCLOHEXYL)-2-(4-METHOXYPHENYL)-ACETATE (6MA)..... 57

### RECYCLING OF THE CATALYST ..... 59

EXPERIMENTAL ..... 59

## DERIVATIZATION OF ENANTIOENRICHED MICHAEL-ADDITION PRODUCTS (*R,R*)-3 FROM FBIP

### CATALYSIS..... 60

|                                                                                                                                                                                                    |    |
|----------------------------------------------------------------------------------------------------------------------------------------------------------------------------------------------------|----|
| ( <i>R</i> )- <i>TERT</i> -BUTYL-2-CYANO-2-(( <i>R</i> )-2-OXOOXEPAN-4-YL)-2-PHENYLACETATE ( <b>4AA</b> ) .....                                                                                    | 60 |
| ( <i>R</i> )- <i>TERT</i> -BUTYL-2-(4-BROMOPHENYL)-2-CYANO-2-(( <i>R</i> )-2-OXOOXEPAN-4-YL)ACETATE ( <b>4IA</b> ) .....                                                                           | 61 |
| (2 <i>R</i> ,3 <i>R</i> )- <i>TERT</i> -BUTYL-2-CYANO-3-(3-HYDROXYPROPYL)-5-OXO-2-PHENYLHEPTANOATE ( <b>5</b> ) .....                                                                              | 62 |
| ( <i>R</i> )- <i>TERT</i> -BUTYL-2-CYANO-2-((1 <i>R</i> ,3 <i>S</i> )-3-HYDROXYLCYCLOHEXYL)-2-PHENYLACETATE (( <i>R</i> , <i>R</i> , <i>S</i> )- <b>6AA</b> ).....                                 | 63 |
| ( <i>R</i> )- <i>TERT</i> -BUTYL-3-AMINO-2-((1 <i>R</i> ,3 <i>S</i> )-3-HYDROXYLCYCLOHEXYL)-3-OXO-2-PHENYLPROPANOATE (( <i>R</i> , <i>R</i> , <i>S</i> )- <b>7</b> )                               | 64 |
| ( <i>S</i> )- <i>TERT</i> -BUTYL-2-(( <i>TERT</i> -BUTOXYLCARBONYL)AMINO)-2-((1 <i>R</i> ,3 <i>S</i> )-3-HYDROXYLCYCLOHEXYL)-2-PHENYLACETATE (( <i>S</i> , <i>R</i> , <i>S</i> )- <b>8</b> ) ..... | 65 |
| ( <i>R</i> )- <i>TERT</i> -BUTYL-2-CYANO-2-((1 <i>R</i> ,3 <i>S</i> )-3-METHOXYCYCLOHEXYL)-2-PHENYLACETATE.....                                                                                    | 66 |
| ( <i>R</i> )-2-CYANO-2-((1 <i>R</i> ,3 <i>S</i> )-3-METHOXYCYCLOHEXYL)-2-PHENYLACETAMIDE (( <i>R</i> , <i>R</i> , <i>S</i> )- <b>9</b> ).....                                                      | 67 |
| ( <i>R</i> )-5-((1 <i>R</i> ,3 <i>S</i> )-3-METHOXYCYCLOHEXYL)-5-PHENYLIMIDAZOLIDINE-2,4-DIONE (( <i>R</i> , <i>R</i> , <i>S</i> )- <b>10</b> ).....                                               | 68 |

## DERIVATIZATION OF ENANTIOENRICHED MICHAEL-ADDITION PRODUCTS (*S*,*R*)-**3** FROM FIP CATALYSIS..... 69

|                                                                                                                                                                                                   |    |
|---------------------------------------------------------------------------------------------------------------------------------------------------------------------------------------------------|----|
| ( <i>S</i> )- <i>TERT</i> -BUTYL-2-(4-CHLOROPHENYL)-2-CYANO-2-(( <i>R</i> )-6,6-DIMETHYL-2-OXOOXEPAN-4-YL)ACETATE ( <b>4HD</b> ) .....                                                            | 69 |
| ( <i>S</i> )- <i>TERT</i> -BUTYL-2-CYANO-2-((1 <i>R</i> ,3 <i>S</i> )-3-HYDROXYLCYCLOHEXYL)-2-PHENYLACETATE (( <i>S</i> , <i>R</i> , <i>S</i> )- <b>6AA</b> ) .....                               | 70 |
| ( <i>S</i> )- <i>TERT</i> -BUTYL-3-AMINO-2-((1 <i>R</i> ,3 <i>S</i> )-3-HYDROXYLCYCLOHEXYL)-3-OXO-2-PHENYLPROPANOATE (( <i>S</i> , <i>R</i> , <i>S</i> )- <b>7</b> )                              | 71 |
| ( <i>R</i> )- <i>TERT</i> -BUTYL-2-(( <i>TERT</i> -BUTOXYLCARBONYL)AMINO)-2-((1 <i>R</i> ,3 <i>S</i> )-3-HYDROXYLCYCLOHEXYL)-2-PHENYLACETATE (( <i>R</i> , <i>R</i> , <i>S</i> )- <b>8</b> )..... | 72 |
| ( <i>S</i> )- <i>TERT</i> -BUTYL-2-CYANO-2-((1 <i>R</i> ,3 <i>S</i> )-3-METHOXYCYCLOHEXYL)-2-PHENYLACETATE .....                                                                                  | 74 |
| ( <i>S</i> )-2-CYANO-2-((1 <i>R</i> ,3 <i>S</i> )-3-METHOXYCYCLOHEXYL)-2-PHENYLACETAMIDE (( <i>S</i> , <i>R</i> , <i>S</i> )- <b>9</b> ) .....                                                    | 75 |
| ( <i>S</i> )-5-((1 <i>R</i> ,3 <i>S</i> )-3-METHOXYCYCLOHEXYL)-5-PHENYLIMIDAZOLIDINE-2,4-DIONE (( <i>S</i> , <i>R</i> , <i>S</i> )- <b>10</b> ).....                                              | 76 |

## DETERMINATION OF THE ABSOLUTE CONFIGURATION BY X-RAY ANALYSIS AND CHEMICAL CORRELATION ..... 78

|                                                                                                                                                                                     |    |
|-------------------------------------------------------------------------------------------------------------------------------------------------------------------------------------|----|
| TRANSFORMATION OF ( <i>R</i> , <i>R</i> )- <b>3AB</b> INTO ( <i>R</i> , <i>R</i> )- <b>3AA</b> AND FURTHER INTO ( <i>R</i> , <i>R</i> )- <b>3AC</b> BY GRADUAL RING EXPANSION ..... | 81 |
| REDUCTIVE DEHALOGENATION OF MICHAEL-ADDITION PRODUCTS .....                                                                                                                         | 83 |

## KINETIC INVESTIGATIONS OF THE FBIP CATALYZED ASYMMETRIC MICHAEL-ADDITION ..... 85

|                                                                                           |    |
|-------------------------------------------------------------------------------------------|----|
| EXPERIMENTAL .....                                                                        | 85 |
| REACTION ORDER OF THE CATALYST <b>FBIP-O<sub>2</sub>CC<sub>3</sub>F<sub>7</sub></b> ..... | 86 |
| REACTION ORDER OF ACETIC ACID.....                                                        | 89 |

|                                                                                                        |            |
|--------------------------------------------------------------------------------------------------------|------------|
| INFLUENCE OF SUBSTITUTED BENZOIC ACIDS.....                                                            | 92         |
| REACTION ORDER OF ENONE <b>2A</b> .....                                                                | 94         |
| REACTION ORDER OF $\alpha$ -PHENYL- $\alpha$ -CYANOACETATE ( <b>1A</b> ).....                          | 95         |
| INFLUENCE OF DIGLYME ON THE REACTION RATE AND STEREOSELECTIVITY.....                                   | 96         |
| INFLUENCE OF MeCN ON THE REACTION RATE .....                                                           | 99         |
| COURSE OF THE REACTION .....                                                                           | 100        |
| DERIVATION OF THE THEORETICAL RATE LAW FROM THE PROPOSED MECHANISM .....                               | 103        |
| <b>KINETIC INVESTIGATIONS OF THE FIP CATALYZED ASYMMETRIC MICHAEL-ADDITION .....</b>                   | <b>106</b> |
| REACTION ORDER OF THE CATALYST <b>FIP-O<sub>2</sub>CC<sub>3</sub>F<sub>7</sub></b> .....               | 106        |
| REACTION ORDER OF ACETIC ACID.....                                                                     | 113        |
| REACTION ORDER OF ENONE <b>2A</b> .....                                                                | 115        |
| REACTION ORDER OF $\alpha$ -PHENYL- $\alpha$ -CYANOACETATE ( <b>1A</b> ).....                          | 117        |
| INFLUENCE OF DIGLYME ON THE REACTION RATE.....                                                         | 118        |
| INFLUENCE OF MeCN ON THE REACTION RATE .....                                                           | 121        |
| INVESTIGATION OF THE NON-LINEAR EFFECT OF <b>FIP-O<sub>2</sub>CC<sub>3</sub>F<sub>7</sub></b> .....    | 122        |
| SPECTROSCOPIC INVESTIGATION OF THE NATURE OF <b>FIP-O<sub>2</sub>CC<sub>3</sub>F<sub>7</sub></b> ..... | 123        |
| COURSE OF THE REACTION .....                                                                           | 124        |
| <b>REFERENCES.....</b>                                                                                 | <b>128</b> |
| <b>NMR SPECTRA.....</b>                                                                                | <b>129</b> |
| <b>HPLC DATA.....</b>                                                                                  | <b>206</b> |

## Experimental

All reactions were performed in oven dried (150 °C) glassware and were magnetically stirred. A positive pressure of nitrogen (ca. 0.2 bar) was used as protective atmosphere. For all reactions liquids and solutions were added *via* syringe and septa. Solvents were removed by rotary evaporation at 40 °C bath temperature and 600 – 10 mbar pressure or by a constant stream of nitrogen. Non-volatile compounds were dried *in vacuo* at 0.1 mbar.

Diethyl ether, tetrahydrofuran (THF) and dichloromethane were distilled and further purified by a solvent purification system. Diglyme and acetonitrile (anhydrous, >99.5%) were stored over 4Å molecular sieves in crown capped bottles under nitrogen atmosphere. Methanol (super gradient grade), absolute ethanol, *iso*-propanol, chloroform (>99%), *n*-hexane (HPLC grade) and *n*-pentane (UV quality) were used as purchased. For work-up procedures and column chromatography distilled technical grade solvents (diethyl ether, petrol ether and ethyl acetate) were used. 2-Cyclohexen-1-one (**2a**) was distilled in vacuum prior to use and stored at –30 °C under inert atmosphere. [FBIP-CI]<sub>2</sub>,<sup>1</sup> [FIP-CI]<sub>2</sub>,<sup>2</sup>  $\alpha$ -aryl- $\alpha$ -cyanoacetates **1a-j**,<sup>3</sup> 5,5-dimethylcyclohexen-1-one (**2d**),<sup>4</sup> 1*H*-inden-1-one (**2e**)<sup>5</sup> and silver salts<sup>6</sup> were prepared according to literature procedures. All other chemicals were purchased and used without further purification.

Reactions were either monitored by HPLC (reverse phase, acetonitrile/water as eluent) or by thin layer chromatography (TLC) with silica-plates (*silica gel 60 F<sub>254</sub>*). Visualization was achieved by fluorescence quenching under UV light ( $\lambda = 254$  nm) and/or by staining with KMnO<sub>4</sub>/NaOH-solution (0.5 g KMnO<sub>4</sub> in 100 mL 0.1M NaOH). Preparative column chromatography for compound purification was performed on silica (0.040–0.063 mm), using a positive pressure of nitrogen (ca. 0.2 bar). Yields refer to pure isolated products and are calculated in mol% of the used starting material. Conversions refer to unconsumed cyanoacetate **2** and were either determined by <sup>1</sup>H-NMR using an internal standard or by RP-HPLC with a corresponding calibration curve.

<sup>1</sup>H and <sup>13</sup>C NMR spectra were recorded at 21 °C on spectrometers operating at 250, 300 or 500 MHz for <sup>1</sup>H and 63, 75 or 125 MHz for <sup>13</sup>C. <sup>19</sup>F NMR spectra were recorded at 21 °C on a spectrometer operating at 235 MHz. Deuterated solvents were used as purchased and are stated after the corresponding frequency. Chemical shifts in ppm refer to tetramethylsilane ( $\delta = 0$ ) as internal standard. Coupling constants *J* are given in Hz and the following abbreviations are used for multiplicities: *s* (singlet), *d* (doublet), *t* (triplet), *q* (quartet), *p* (pentet), *m* (multiplet), *b* (broad signal). IR spectra were recorded by the analytical service of the Universität Stuttgart on a spectrometer with an ATR-unit. The aggregation state of the sample is stated in parentheses,

signals are given by wavenumbers ( $\text{cm}^{-1}$ ). The *dr*- and *ee*-values of the Michael-Addition products **3** were determined by chiral stationary phase HPLC if not other mentioned. Optical rotation was measured at 20 °C on a polarimeter operating at the sodium-D line ( $\lambda = 589 \text{ nm}$ ). Path length of the quartz cell was 100 mm, solvent and concentration in  $\text{g mL}^{-1}$  are stated in parentheses. Melting points were measured in open glass capillaries and are uncorrected. Mass spectra were performed by the analytical service of the Universität Stuttgart. The ionization method is stated in parentheses. Microanalyses were performed by the analytical service of the Universität Stuttgart. Single crystal X-ray analysis was performed by Dr. Wolfgang Frey.

## General Procedures (GP)

### General Procedure for the Formation of $\alpha$ -Aryl- $\alpha$ -cyanoacetates **1** (GP1)

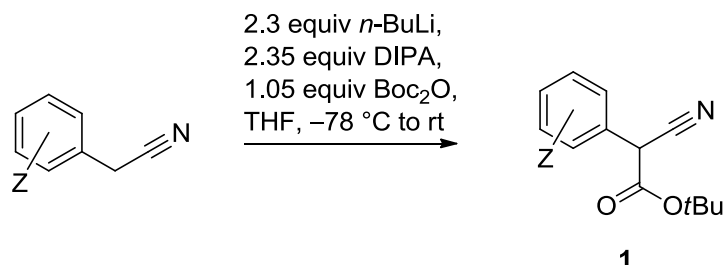

*n*-Butyllithium (39.3 mmol, 2.3 equiv) was added at -78 °C to *N,N*-di-*iso*-propylamine (40.1 mmol, 2.35 equiv) in THF (40 mL) under protective atmosphere. The solution was warmed to room temperature and cooled to -78 °C after 5 min. A solution of the corresponding 2-arylacetonitrile (17.1 mmol, 1 equiv) in THF (15 mL) was added slowly. The reaction mixture was then warmed to room temperature and stirred for additional 10 min before it was cooled to -78 °C. Then di-*tert*-butyldicarbonate (17.9 mmol, 1.05 equiv) in THF (10 mL) was added and the reaction mixture was stirred for 18 h at room temperature. The reaction was quenched by adding saturated aqueous ammonium chloride (10 mL). Water and diethyl ether were added for a clear phase separation. The separated organic layer was dried over Na<sub>2</sub>SO<sub>4</sub>, filtrated and the solvent was removed *in vacuo*. Pure  $\alpha$ -aryl- $\alpha$ -cyanoacetate **1** was obtained after vacuum distillation or column chromatography.<sup>3</sup>

### General Procedure for the Formation of Racemic Michael-Addition Products **3** (GP2)

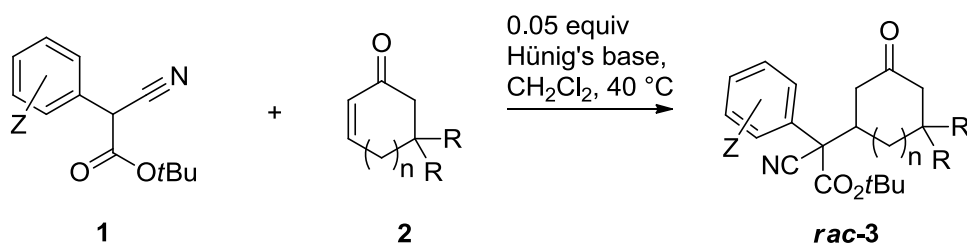

The  $\alpha$ -aryl- $\alpha$ -cyanoacetate **1** (1 equiv) was dissolved in CH<sub>2</sub>Cl<sub>2</sub> (~3 mL per mmol **1**) and the enone **2** (1 equiv) and *N,N*-di-*iso*-propyl-*N*-ethylamine (0.05 equiv) were added. The reaction mixture was stirred overnight at 40 °C. Solvent was removed *in vacuo* and the residue was



subjected to column chromatography to give the pure, racemic product *rac*-**3**.<sup>6</sup> The reaction is not optimized.

### General Procedure for the Catalytic Asymmetric Michael-Addition (GP3)

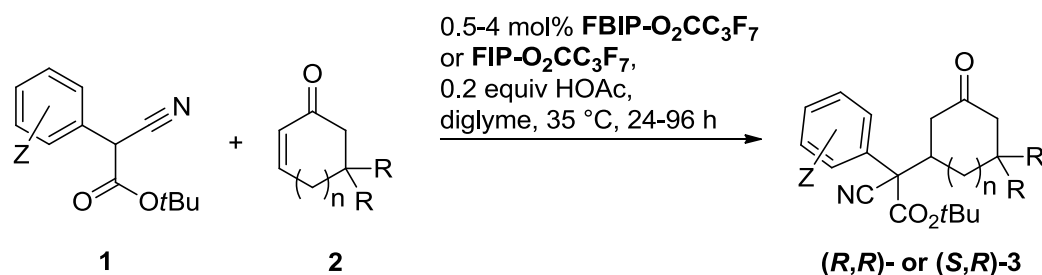

To the corresponding  $\alpha$ -aryl- $\alpha$ -cyanoacetate **1** (0.09 mmol, 1 equiv) in diglyme (in total 170  $\mu$ L diglyme per 0.09 mmol  $\alpha$ -aryl- $\alpha$ -cyanoacetate) were added acetic acid as a stock solution in diglyme ( $c = 0.87 \text{ mol L}^{-1}$ , 0.2 equiv), the activated catalyst **FBIP-O<sub>2</sub>CC<sub>3</sub>F<sub>7</sub>** or **FIP-O<sub>2</sub>CC<sub>3</sub>F<sub>7</sub>** (stock solution in diglyme, see “Activation of the Precatalyst **[FBIP-Cl]<sub>2</sub>** and **[FIP-Cl]<sub>2</sub>** with AgO<sub>2</sub>CC<sub>3</sub>F<sub>7</sub> / Acetonitrile”, S-17) and finally the corresponding enone **2** (0.18 mmol, 2.0 equiv). The reaction mixture was stirred for the indicated time at 35 °C. Afterwards *n*-pentane was added to precipitate the catalyst and the resulting suspension was filtrated through silica. The filter cake was further washed with petrol ether: ethyl acetate (4:1). Removal of the solvent and an excess of enone **2** resulted in the pure Michael-Addition products **3**.<sup>6</sup>

### General Procedure for the Reduction of the Keto Group in the Michael-Addition Product **3** (GP4)

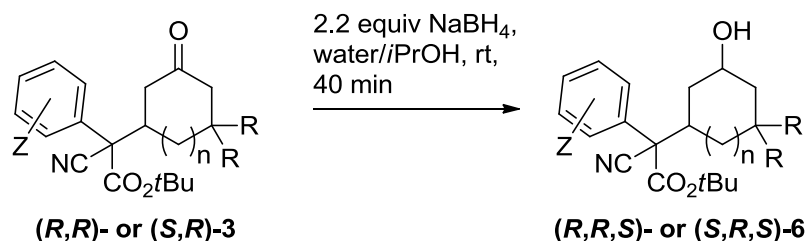

The Michael-addition product **3** (1 equiv) was dissolved in *i*-PrOH (1 mL per 60.0 mg) and a solution of NaBH<sub>4</sub> (2.2 equiv) in water (1 mL per 50 mg) was added dropwise to the ketone at room temperature. The reaction was stirred for an additional 40 min and was quenched and acidified with conc. HCl. The aqueous phase was extracted three times with ethylacetate. The

combined organic phase was dried over  $\text{Na}_2\text{SO}_4$ , filtrated and the solvent removed *in vacuo*. The residue was subjected to column chromatography (PE:EtOAc = 4:1) to give the pure secondary alcohol **6**.

### General Procedure for the Reductive Dehalogenation of Michael-Addition Product **3** (GP5)

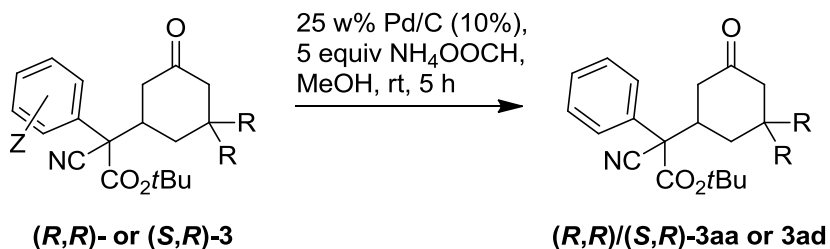

The Michael-addition product **3** (1 equiv) was dissolved in MeOH (1 mL per 10.0 mg) and ammonium formate (5 equiv) was added. Pd/C (10%, 25w% of the starting material **3**) was added under oxygen free atmosphere and the reaction was stirred for 5 h at room temperature. Afterwards the solvent was removed *in vacuo* and  $\text{CH}_2\text{Cl}_2$  was added to the residue. The suspension was filtered over a short pad of celite/silica (1:1) and the solvent removed *in vacuo* to gain the crude product. The residue was subjected to column chromatography (PE:EtOAc = 9:1) to give the pure dehalogenated product **3aa** or **3ad**.<sup>7</sup> The reaction is not optimized.

## Synthesis of Silver Salts

### Silver(I)(bistrifluoromethane)sulfonimide

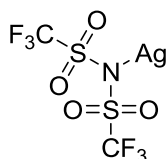

Lithium(bistrifluoromethane)sulfonimide (2.00 g, 7.00 mmol) was dissolved in demin. water and treated with conc. HCl (10M). The resulting imide polyhydrate was obtained by extraction with diethyl ether and solvent removal. The oily residue was dissolved in diethyl ether, stirred for a few min and solvent removed. This was repeated three times to give the monohydrate of the imide. Afterwards it was dissolved in acetonitrile to form a 1M solution and silver carbonate (528.3 mg, 1.92 mmol, 0.55 equiv) was added. The suspension was stirred for 2 h at room temperature, then it was filtrated and the solvent removed *in vacuo*. Recrystallization from CH<sub>2</sub>Cl<sub>2</sub> resulted in solid, colorless **AgN(Tf)<sub>2</sub>** (1.11 g, 2.87 mmol, 41%).

**C<sub>2</sub>AgF<sub>6</sub>NO<sub>4</sub>S<sub>2</sub>**, MW: 388.01 g mol<sup>-1</sup>. **Mp**: decomposition > 250°C. **<sup>13</sup>C NMR (75 MHz, CD<sub>3</sub>CN, 21 °C)**: δ = 119.5 (*q*, *J* = 321, CF<sub>3</sub>). **<sup>19</sup>F NMR (235 MHz, CD<sub>3</sub>CN, 21 °C)**: δ = -80.17. **Microanalysis**: Calculated for C<sub>2</sub>AgF<sub>6</sub>NO<sub>4</sub>S<sub>2</sub>: C: 6.19; N: 3.61; S: 16.53. Found: C: 6.50; N: 3.67; S: 16.17.

## Synthesis of Cyclic Enones

### 3-Ethoxy-5,5-dimethyl-2-cyclohexen-1-one<sup>4</sup>

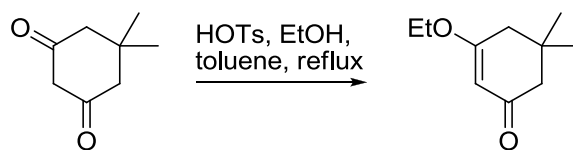

Dimedone (5 g, 35.7 mmol, 1 equiv), absolute ethanol (6.7 mL, 3.2 equiv) and *p*-toluenesulfonic acid (142 mg, 2.1 mol%) in toluene (40 mL) were heated with azeotropic removal of water until dimedone had completely reacted (usually after 5 h). Removal of the solvent and vacuum distillation (95 °C at 1.6 mbar) of the residual resulted in pure liquid, colorless 3-ethoxy-5,5-dimethyl-2-cyclohexen-1-one (3.88 g, 23.1 mmol, 65%).

**C<sub>10</sub>H<sub>16</sub>O<sub>2</sub>**, MW: 168.23 g mol<sup>-1</sup>. <sup>1</sup>H NMR (300 MHz, CDCl<sub>3</sub>, 21 °C): δ = 5.35 (*s*, 1H, CH), 3.91 (*q*, *J* = 7.0, 2H, OCH<sub>2</sub>CH<sub>3</sub>), 2.28 (*s*, 2H, CH<sub>2</sub>), 2.21 (*s*, 2H, CH<sub>2</sub>), 1.37 (*t*, *J* = 7.0, 3H, OCH<sub>2</sub>CH<sub>3</sub>), 1.07 (*s*, 6H, CH<sub>3</sub>). <sup>13</sup>C NMR (75 MHz, CDCl<sub>3</sub>, 21 °C): δ = 199.7, 176.3, 101.5, 64.3, 50.7, 42.9, 32.5, 28.3, 14.1. The other analytical data are in accordance with the literature.<sup>4</sup>

### 5,5-dimethyl-2-cyclohexen-1-one (2d)<sup>4</sup>

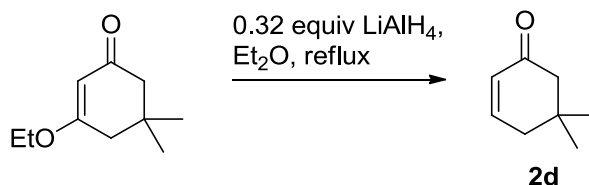

3-Ethoxy-5,5-dimethyl-2-cyclohexen-1-one (2.00 g, 12 mmol, 1 equiv) in dry diethyl ether (10 mL) was dropwise added to a suspension of LiAlH<sub>4</sub> (144.4 mg, 3.8 mmol, 0.32 equiv) in dry diethyl ether (20 mL) so that the ether was slightly boiling. Subsequently the reaction mixture was heated to reflux and stirred for an additional hour. Afterwards the flask was cooled with ice and ice water was added very carefully until the formation of hydrogen ended. The formed precipitate was dissolved with aq. H<sub>2</sub>SO<sub>4</sub> (9 mL, 10%). The layers were separated and the aqueous phase was extracted two times with diethyl ether. The combined organic layer was dried over MgSO<sub>4</sub>, filtrated and the solvent was removed *in vacuo*. Vacuum distillation of the residue gave 5,5-dimethyl-2-cyclohexen-1-one as pale yellow liquid (0.94 g, 7.6 mmol, 63%).

**C<sub>8</sub>H<sub>12</sub>O**, MW: 124.18 g mol<sup>-1</sup>. <sup>1</sup>H NMR (300 MHz, CDCl<sub>3</sub>, 21 °C): δ = 6.87 (dt, *J* = 10.1, 4.1, 1H, CH), 6.03 (dt, *J* = 10.1, 2.0, 1H, CH), 2.28 (s, 2H, CH<sub>2</sub>), 2.25 (dd, *J* = 2.0, 2.0, 2H, CH<sub>2</sub>), 1.06 (s, 6H, CH<sub>3</sub>). <sup>13</sup>C NMR (75 MHz, CDCl<sub>3</sub>, 21 °C): δ = 200.0, 148.4, 128.9, 51.8, 39.9, 33.9, 28.3. The other analytical data are in accordance with the literature.<sup>4</sup>

### 3-Bromo-2,3-dihydro-1*H*-inden-1-one<sup>8</sup>

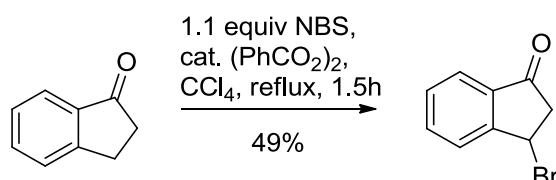

To 1*H*-indan-1-one (2.64 g, 20.0 mmol, powder) in CCl<sub>4</sub> (150 mL) was added N-bromosuccinimide (3.91 g, 22.0 mmol, 1.1 equiv) and dibenzoylperoxide (48.4 mg, 0.20 mmol, 0.01 equiv). The mixture was stirred under reflux for 1.5h. Afterwards the reaction mixture was cooled, filtered and concentrated *in vacuo*. The oily crude product was recrystallized from EtOAc/heptanes (1:4, 10 mL) to give 3-bromo-2,3-dihydro-1*H*-inden-1-one (2.08 g, 9.88 mmol, 49%) as orange solid.

**C<sub>9</sub>H<sub>7</sub>BrO**, MW: 211.06 g mol<sup>-1</sup>. *Mp*: 54.0–54.5 °C. <sup>1</sup>H NMR (300 MHz, CDCl<sub>3</sub>, 21 °C): δ = 7.77–7.70 (*m*, 3H, arom. *H*), 7.53–7.45 (*m*, 1H, arom. *H*), 5.61 (*dd*, *J* = 7.1, 2.7, 1H, CH), 3.39 (*dd*, *J* = 20.0, 7.2, 1H, CH<sub>2</sub>), 3.06 (*dd*, *J* = 19.8, 2.8, 1H, CH<sub>2</sub>). <sup>13</sup>C NMR (75 MHz, CDCl<sub>3</sub>, 21 °C): δ = 201.5, 154.3, 136.0, 135.6, 129.7, 127.5, 123.4, 48.1, 40.6. The other analytical data are in accordance with the literature.<sup>8</sup>

### 1*H*-Inden-1-one (2e)<sup>5</sup>

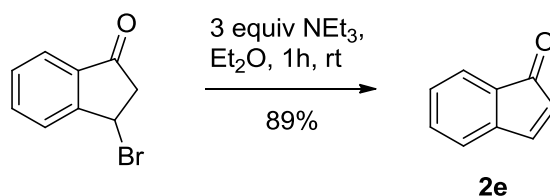

To a solution of 3-bromo-2,3-dihydro-1*H*-inden-1-one (501.0 mg, 2.37 mmol) in Et<sub>2</sub>O (5 mL) was added triethylamine (990 μL, 7.12 mmol, 3 equiv) dropwise over 10 min at room temperature. The reaction was stirred for 1h. Then water was added and the organic phase was several times well washed with water, brine and dried over Na<sub>2</sub>SO<sub>4</sub>. After filtration and

concentration in vacuo, the crude product was purified by vacuum distillation (0.54 mbar, 47 °C) to give 1*H*-inden-1-one **2e** (275.0 mg, 2.11 mmol, 89%) as pale yellow, viscous oil.

**C<sub>9</sub>H<sub>6</sub>O**, MW: 130.14 g mol<sup>-1</sup>. **<sup>1</sup>H NMR (300 MHz, CDCl<sub>3</sub>, 21 °C):**  $\delta$  = 7.56 (*d*, *J* = 5.8, 1H, *CH*), 7.42 (*d*, *J* = 6.6, 1H, arom. *H*), 7.34 (*t*, *J* = 7.5, 1H, arom. *H*), 7.22 (*t*, *J* = 7.5, 1H, arom. *H*), 7.05 (*d*, *J* = 7.0, 1H, arom. *H*), 5.88 (*d*, *J* = 5.8, 1H, *CH*). **<sup>13</sup>C NMR (75 MHz, CDCl<sub>3</sub>, 21 °C):**  $\delta$  = 198.5, 149.8, 144.6, 133.7, 130.4, 129.1, 127.2, 122.6, 122.3. The other analytical data are in accordance with the literature.<sup>5</sup>

## Synthesis of $\alpha$ -Aryl- $\alpha$ -Cyanoacetates

### *tert*-Butyl-2-cyano-(*o*-fluorophenyl)acetate (**1k**)

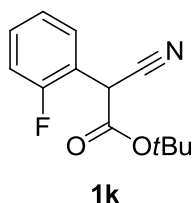

According to GP1 2-(*o*-fluorophenyl)acetonitrile (2.00 g, 14.8 mmol, 1 equiv) was treated with di-*tert*-butyldicarbonate (3.39 g, 15.5 mmol, 1.05 equiv). Column chromatography (petrol ether: EtOAc = 18:1) of the crude product resulted in liquid, pale yellow *tert*-butyl-2-cyano-(*o*-fluorophenyl)acetate (**1k**, 2.33 g, 9.92 mmol, 67%).

**C<sub>13</sub>H<sub>14</sub>FNO<sub>2</sub>**, MW: 235.25 g mol<sup>-1</sup>. **<sup>1</sup>H NMR (300 MHz, CDCl<sub>3</sub>, 21 °C):**  $\delta$  = 7.50 (*td*, *J* = 7.5, 1.7, 1H, arom. *H*), 7.43-7.36 (*m*, 1H, arom. *H*), 7.22 (*td*, *J* = 7.6, 1.1, 1H, arom. *H*), 7.16-7.10 (*m*, 1H, arom. *H*), 4.92 (*s*, 1H, *CH*), 1.47 (*s*, 9H, *CH*<sub>3</sub>). **<sup>13</sup>C NMR (75 MHz, CDCl<sub>3</sub>, 21 °C):**  $\delta$  = 162.9, 160.0 (*d*, *J* = 250.2, *CF*), 131.2 (*d*, *J* = 8.3, *CCCCF*), 129.6 (*d*, *J* = 2.4, *CCCCF*), 124.9 (*d*, *J* = 3.8, *CCCCF*), 118.4 (*d*, *J* = 14.8, *CCF*), 115.9 (*d*, *J* = 20.9, *CCF*), 115.2, 84.9, 38.3, 27.6. **<sup>19</sup>F NMR (235 MHz, CDCl<sub>3</sub>, 21 °C):**  $\delta$  = -116.73 (*m*, 1F). **IR (film):**  $\nu$  = 2984, 2938, 1747, 1619, 1592, 1496, 1396, 1372, 1280, 1243, 1151, 1106, 1094, 1035, 950. **HRMS (EI) *m/z*:** Calc. for [M - CH<sub>3</sub>]<sup>+</sup>: 220.0769. Found: 220.0770. **Microanalysis:** Calc. for C<sub>13</sub>H<sub>14</sub>NO<sub>2</sub>F: C: 66.37; H: 6.00; N: 5.95. Found: C: 66.45; H: 6.17; N: 6.16.

### *tert*-Butyl-2-cyano-(*m*-fluorophenyl)acetate (**1l**)

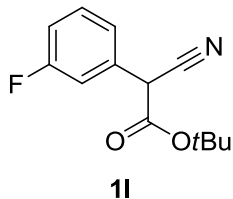

According to GP1 2-(*m*-fluorophenyl)acetonitrile (2.45 g, 18.1 mmol, 1 equiv) was treated with di-*tert*-butyldicarbonate (4.15 g, 19.0 mmol, 1.05 equiv). Column chromatography (petrol ether: EtOAc = 9:1) of the crude product resulted in liquid, pale yellow *tert*-butyl-2-cyano-(*m*-fluorophenyl)acetate (**1l**, 2.68 g, 11.4 mmol, 63%).

**C<sub>13</sub>H<sub>14</sub>FNO<sub>2</sub>**, MW: 235.25 g mol<sup>-1</sup>. **<sup>1</sup>H NMR (300 MHz, CDCl<sub>3</sub>, 21 °C):** δ = 7.44-7.36 (*m*, 1H, arom. *H*), 7.26-7.16 (*m*, 2H, arom. *H*), 7.13-7.07 (*m*, 1H, arom. *H*), 4.62 (*s*, 1H, *CH*), 1.46 (*s*, 9H, *CH*<sub>3</sub>). **<sup>13</sup>C NMR (75 MHz, CDCl<sub>3</sub>, 21 °C):** δ = 163.3, 162.9 (*d*, *J* = 248.8, CF), 132.5 (*d*, *J* = 7.9, CCCC), 130.9 (*d*, *J* = 8.4, CCCC), 123.6 (*d*, *J* = 3.3, CCCC), 116.2 (*d*, *J* = 21.1, CCF), 115.5, 115.2 (*d*, *J* = 23.4, CCF), 85.0, 44.5, 44.4, 27.6. **<sup>19</sup>F NMR (235 MHz, CDCl<sub>3</sub>, 21 °C):** δ = -111.07 (*m*, 1F). **IR (film):** ν = 2984, 2939, 2252, 1744, 1606, 1510, 1480, 1459, 1420, 1396, 1372, 1282, 1259, 1238, 1150, 1101, 949. **HRMS (EI) *m/z*:** Calc. for [M - CH<sub>3</sub>]<sup>+</sup>: 220.0769. Found: 220.0767. **Microanalysis:** Calc. for C<sub>13</sub>H<sub>14</sub>NO<sub>2</sub>F: C: 66.37; H: 6.00; N: 5.95. Found: C: 66.26; H: 5.88; N: 5.98.

### ***tert*-Butyl-2-cyano-(4-methoxyphenyl)acetate (1m)**

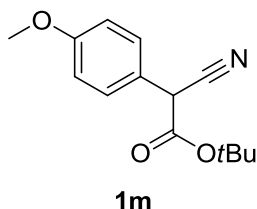

According to GP1 2-(4-methoxyphenyl)acetonitrile (2.25 g, 15.3 mmol, 1 equiv) was treated with di-*tert*-butyldicarbonate (3.51 g, 16.1 mmol, 1.05 equiv). Column chromatography (petrol ether: EtOAc = 9:1) of the crude product resulted in liquid, pale yellow *tert*-butyl-2-cyano-(4-methoxyphenyl)acetate (**1m**, 3.14 g, 12.7 mmol, 83%).

**C<sub>14</sub>H<sub>17</sub>NO<sub>3</sub>**, MW: 247.29 g mol<sup>-1</sup>. **<sup>1</sup>H NMR (300 MHz, CDCl<sub>3</sub>, 21 °C):** δ = 7.35 (*d*, *J* = 8.8, 2H, *o*-*CH*), 6.92 (*d*, *J* = 8.8, 2H, *m*-*CH*), 4.55 (*s*, 1H, *CH*), 3.82 (*s*, 3H, OCH<sub>3</sub>), 1.44 (*s*, 9H, *CH*<sub>3</sub>). **<sup>13</sup>C NMR (75 MHz, CDCl<sub>3</sub>, 21 °C):** δ = 164.2, 160.0, 129.0, 122.4, 116.2, 114.6, 84.4, 55.4, 44.0, 27.7. **IR (film):** ν = 2981, 2938, 2840, 1742, 1612, 1587, 1514, 1461, 1396, 1371, 1306, 1255, 1181, 1150, 1034, 948. **HRMS (EI) *m/z*:** Calc. for [C<sub>14</sub>H<sub>17</sub>NO<sub>3</sub>]<sup>+</sup>: 247.1203. Found: 247.1203. **Microanalysis:** Calc. for C<sub>14</sub>H<sub>17</sub>NO<sub>3</sub>: C: 68.00; H: 6.93; N: 5.66. Found: C: 68.08; H: 6.90; N: 5.92.



## Activation of the Precatalyst [FBIP-Cl]<sub>2</sub> and [FIP-Cl]<sub>2</sub> with AgO<sub>2</sub>CC<sub>3</sub>F<sub>7</sub> / Acetonitrile

Bis(acetonitrile)[μ-[(1*S*<sub>p</sub>, 1'*S*<sub>p</sub>)-2,2'-bis[(4*R*,5*R*)-4,5-dihydro-1-[(4-methylphenyl)sulfonyl]-4,5-diphenyl-1*H*-imidazol-2-yl-κ*N*3]-1,1'-ferrocendiyl-κ*C*1: κ*C*1']]bis(heptafluorobutyrate-κ*O*)di-palladium(II) (FBIP-O<sub>2</sub>CC<sub>3</sub>F<sub>7</sub>)

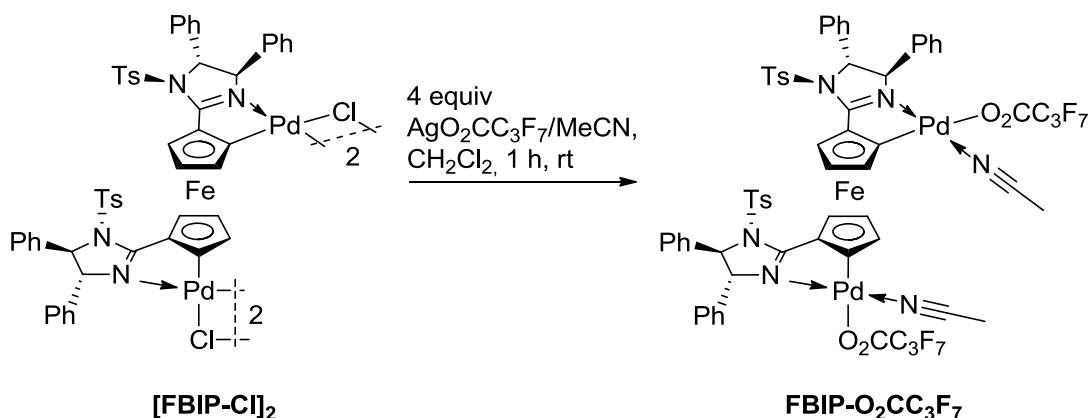

AgO<sub>2</sub>CC<sub>3</sub>F<sub>7</sub> (77.2 mg, 0.25 mmol, 4 equiv) was dissolved in acetonitrile (~2 mL) and the solution was stirred for a few min. The solvent was then removed by a constant stream of nitrogen. A solution of the precatalyst [FBIP-Cl]<sub>2</sub> (150.0 mg, 62 μmol, 1 equiv) in CH<sub>2</sub>Cl<sub>2</sub> (1 mL per 5 mg silver salt) was added and the suspension was stirred for 1 h at room temperature. Afterwards the suspension was filtrated over celite, followed by filtration over silica, to completely remove silver traces, and the solvent was removed *in vacuo* at room temperature to give pure FBIP-O<sub>2</sub>CC<sub>3</sub>F<sub>7</sub> as an orange-red solid (205.9 mg, 62 μmol, quant.).

**C<sub>66</sub>H<sub>50</sub>F<sub>14</sub>FeN<sub>6</sub>O<sub>8</sub>Pd<sub>2</sub>S<sub>2</sub>**, MW: 1653.93 g mol<sup>-1</sup>. **Mp**: decomposition > 200°C. [α]<sub>D</sub><sup>20</sup>: +15.2 (c = 0.09, CH<sub>2</sub>Cl<sub>2</sub>). **<sup>1</sup>H NMR (300 MHz, CDCl<sub>3</sub>, 21 °C)**: δ = 7.60-7.42 (m, 16H, arom. H), 7.23-7.07 (m, 8H, arom. H), 6.66 (d, J = 7.8, 4H, arom. H), 5.33 (d, J = 2.1, 2H, Cp-H), 5.15 (t, J = 2.5, 2H, Cp-H), 5.11 (d, J = 3.3, 2H, CHPh), 4.45 (d, J = 3.3, 2H, CHPh), 4.35 (d, J = 1.9, 2H, Cp-H), 2.46 (s, 6H, C<sub>6</sub>H<sub>4</sub>CH<sub>3</sub>), 1.25 (s, 6H, Pd←NCCH<sub>3</sub>). **<sup>13</sup>C NMR (125 MHz, CDCl<sub>3</sub>, 21 °C)**: δ = 170.9, 146.0, 139.7, 138.9, 133.6, 130.3, 129.4, 128.9, 128.1, 125.4, 125.3, 97.0, 85.7, 75.4, 73.9, 73.1, 70.6, 70.3, 29.7, 21.7. **<sup>19</sup>F NMR (235 MHz, CDCl<sub>3</sub>, 21 °C)**: δ = -80.83 (t, J = 8.9, 3F, CF<sub>3</sub>), -115.74 (q, J = 8.7, 1F, CF<sub>2</sub>), -116.19 (q, J = 9.1, 1F, CF<sub>2</sub>), -126.44 (s, 1F, CF<sub>2</sub>COO), -126.50 (s, 1F, CF<sub>2</sub>COO). **IR (solid)**: ν = 3003, 2944, 2925, 2253, 1679, 1645, 1596, 1555, 1467, 1362, 1334, 1210, 1168, 117, 1083, 965. **MS (ESI) m/z**: 1441.05 ([M - O<sub>2</sub>C<sub>4</sub>F<sub>7</sub>]<sup>+</sup>,

3%); 1400.02 ( $[M - O_2C_4F_7 - MeCN]^+$ , 1%); 1359.00 ( $[M - O_2C_4F_7 - 2 MeCN]^+$ , 10%), 573.01 ( $[M - 2 O_2C_4F_7 - 2 MeCN]^{2+}$ , 100%). **HRMS (ESI)  $m/z$** : Calc. for  $C_{54}H_{44}FeN_4O_4Pd_2S_2$ : 573.0119. Found: 573.0114. **Microanalysis**: Calc. for  $C_{66}H_{50}F_{14}FeN_6O_8Pd_2S_2$ : C: 47.93; H: 3.05; N: 5.08. Found: C: 47.90; H: 3.00; N: 5.33.

**(Acetonitrile- $\kappa N$ )-(heptafluorobutyrate- $\kappa O$ )[(1*S*<sub>p</sub>)-2-[(4*R*,5*R*)-4,5-dihydro-1-[(4-methylphenyl)sulfonyl]-4,5-diphenyl-1*H*-imidazol-2-yl- $\kappa N3$ ]-1',2',3',4',5'-pentaphenylferrocenyl- $\kappa C$ ]-palladium(II) (FIP-O<sub>2</sub>CC<sub>3</sub>F<sub>7</sub>)**

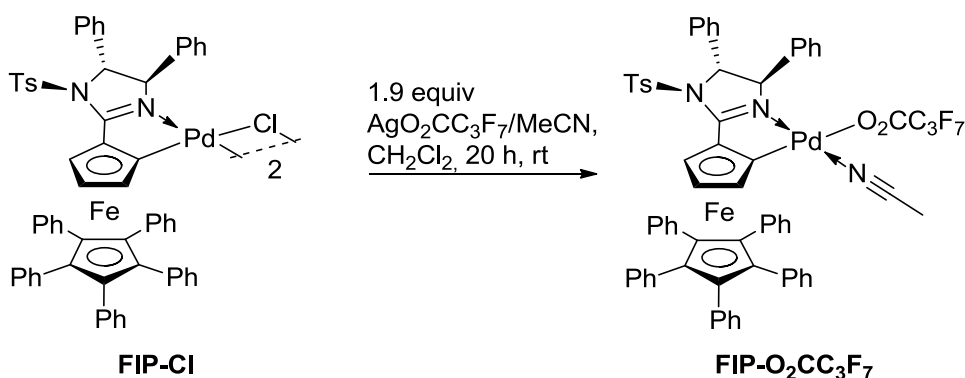

AgO<sub>2</sub>CC<sub>3</sub>F<sub>7</sub> (22.5 mg, 71  $\mu$ mol, 2.0 equiv) was dissolved in acetonitrile (~2 mL) and the solution was stirred for a few min. The solvent was then removed by a constant stream of nitrogen. A solution of the precatalyst [FIP-Cl]<sub>2</sub> (75.8 mg, 35  $\mu$ mol, 1 equiv) in CH<sub>2</sub>Cl<sub>2</sub> (1 mL per 5 mg silver salt) was added and the suspension was stirred for 20 h at room temperature. Afterwards the suspension was filtrated over celite, followed by filtration over silica, to completely remove silver traces, and the solvent was removed *in vacuo* at room temperature to give pure FIP-O<sub>2</sub>CC<sub>3</sub>F<sub>7</sub> as an orange-red solid (91.0 mg, 35  $\mu$ mol, quant.).

**C<sub>68</sub>H<sub>50</sub>F<sub>7</sub>FeN<sub>3</sub>O<sub>4</sub>PdS**, MW: 1300.46 g mol<sup>-1</sup>. **Mp**: decomposition > 200 °C.  $[\alpha]_D^{20}$ : +24.9 (c = 0.10, CH<sub>2</sub>Cl<sub>2</sub>). **<sup>1</sup>H NMR (500 MHz, CDCl<sub>3</sub>, 21 °C) mixture of monomeric and dimeric form (ratio ~ 3.8:1)**:  $\delta$  = 7.52 (*d*, *J* = 7.8, 2H, arom. *H*), 7.36-7.18 (*m*, 12H, arom. *H*), 7.12-7.03 (*m*, 18H, arom. *H*), 6.98 (*t*, *J* = 7.8, 3H, arom. *H*), 6.52-6.42 (*m*, 3H, arom. *H*), 6.27 (*d*, *J* = 7.8, 1H, arom. *H*), 5.78-5.69 (*m*, 1H, Cp-*H*), 4.74-4.43 (*m*, 4H, Cp-*H* and CHPh), 2.48 (*s*, 3H, C<sub>6</sub>H<sub>4</sub>CH<sub>3</sub>), 2.17 (*s*, 3H, Pd←NCCCH<sub>3</sub>), 1.91 (*s*, free NCCCH<sub>3</sub>). For pure <sup>1</sup>H NMR of the monomeric catalyst in presence of 100 equiv MeCN see “Spectroscopic Investigation of the Nature of FIP-O<sub>2</sub>CC<sub>3</sub>F<sub>7</sub>”, S-123. **<sup>13</sup>C NMR (125 MHz, CDCl<sub>3</sub>, 21 °C)**:  $\delta$  = 169.2, 144.0, 138.4, 137.2, 133.0, 132.7, 130.7, 130.4, 128.7, 128.5, 127.2, 126.5, 126.2, 126.1, 126.0, 125.8,

125.3, 124.8, 123.8, 118.4, 114.6, 97.3, 87.3, 78.6, 77.5, 74.1, 73.8, 72.5, 70.8, 27.8, 19.8, 1.5, -1.9. **<sup>19</sup>F NMR (235 MHz, CDCl<sub>3</sub>, 21 °C):**  $\delta$  = -80.87 (*t*, *J* = 8.3, 3F, CF<sub>3</sub>), -116.45 (*m*, 1F, CF<sub>2</sub>), -117.59 (*m*, 1F, CF<sub>2</sub>), -126.34 (*s*, 1F, CF<sub>2</sub>COO), -127.56 (*m*, 1F, CF<sub>2</sub>COO). **IR (film):**  $\nu$  = 3056, 2323, 1667, 1599, 1545, 1503, 1445, 1332, 1225, 1209, 1169, 1117, 1078, 964. **MS (EI) *m/z*:** 1045.17 ([M - O<sub>2</sub>CC<sub>3</sub>F<sub>7</sub> - MeCN]<sup>+</sup>, 100%), 819.16 ([M - O<sub>2</sub>CC<sub>3</sub>F<sub>7</sub> - MeCN - Ts]<sup>+</sup>, 25%). **Microanalysis:** Calc. for C<sub>68</sub>H<sub>50</sub>F<sub>7</sub>FeN<sub>3</sub>O<sub>4</sub>PdS: C: 62.80; H: 3.88; N: 3.23. Found: C: 62.75; H: 3.81; N: 3.54.

## Synthesis of Enantioenriched Michael-Addition Products by Asymmetric Catalysis (3)<sup>i</sup>

### *tert*-Butyl-2-cyano-2-(3-oxocyclohexyl)-2-phenylacetate (**3aa**)

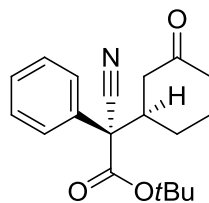

**(*R,R*)-3aa**

According to GP3 *tert*-butyl-2-cyano-2-phenylacetate (**1a**, 400.2 mg, 1.84 mmol, 1 equiv) was treated with 2-cyclohexen-1-one (**2a**, 354.1 mg, 3.68 mmol, 2 equiv) in the presence of **FBIP-O<sub>2</sub>CC<sub>3</sub>F<sub>7</sub>** (30.4 mg, 18.0 μmol, 1 mol%) to yield **(*R,R*)-3aa** (577.3 mg, 1.84 mmol, 99%,  $ee_{(R,R)} = 94%$ ,  $ee_{(S,S)} = 65%$ ,  $dr_{(R,R+S,S):(S,R+R,S)} = 89:11$ ) as a colorless oil. The  $dr$  and  $ee$  values were determined by chiral column HPLC: Chiracel OD-H, *n*-hexane/*i*-PrOH (99/1), 0.9 mL min<sup>-1</sup>, detection at 210 nm,  $t_{(R,R)} = 13.3$  min,  $t_{(S,S)} = 41.3$  min. The major diastereomer was isolated by column chromatography (CH<sub>2</sub>Cl<sub>2</sub> + 1% Et<sub>2</sub>O).

**C<sub>19</sub>H<sub>23</sub>NO<sub>3</sub>**, MW: 313.39 g mol<sup>-1</sup>.  $[\alpha]_D^{20}$ : +44.5 (c = 0.01, CH<sub>2</sub>Cl<sub>2</sub>). **<sup>1</sup>H NMR (300 MHz, CDCl<sub>3</sub>, 21 °C) of the (*R,R*)/(*S,S*)-diastereomer:** δ = 7.54-7.51 (*m*, 2H, arom. *H*), 7.43-7.36 (*m*, 3H, arom. *H*), 2.86-2.75 (*m*, 1H, *CH*), 2.45-2.39 (*m*, 1H, *CH*<sub>2</sub>), 2.37-2.26 (*m*, 1H, *CH*<sub>2</sub>), 2.22-2.07 (*m*, 3H, *CH*<sub>2</sub>), 1.92-1.64 (*m*, 3H, *CH*<sub>2</sub>), 1.43 (*s*, 9H, *CH*<sub>3</sub>). **<sup>13</sup>C NMR (75 MHz, CDCl<sub>3</sub>, 21 °C) of the (*R,R*)/(*S,S*)-diastereomer:** δ = 208.6, 165.2, 133.0, 129.2, 129.0, 126.3, 116.9, 85.0, 60.6, 45.2, 44.6, 40.8, 27.9, 25.8, 24.0. **IR (solid) of the (*R,R*)/(*S,S*)-diastereomer:** ν = 3001, 2987, 2957, 2906, 2857, 2246, 1730, 1716, 1491, 1451, 1425, 1395, 1365, 1251, 1227, 1146, 1060, 1035.

<sup>i</sup> The notation of the Michael-addition products, e.g. **3ab** implicates the use of Michael-donor **1a** and of the Michael-acceptor **2b**.

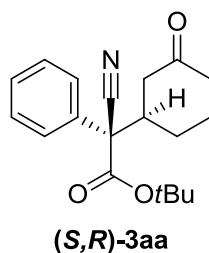

According to GP3 *tert*-butyl-2-cyano-2-phenylacetate **1a** (470.0 mg, 2.16 mmol, 1 equiv) was treated with 2-cyclohexen-1-one **2a** (415.9 mg, 4.33 mmol, 2 equiv) in the presence of **FIP-O<sub>2</sub>CC<sub>3</sub>F<sub>7</sub>** (28.1 mg, 22.0 μmol, 1 mol%) to yield **(S,R)-3aa** (609.0 mg, 1.94 mmol, 90%,  $ee_{(S,R)} = 89%$ ,  $ee_{(R,R)} = 33%$ ,  $dr_{(S,R+S):(R,R+S,S)} = 71:29$ ) as a colorless oil. The  $dr$  and  $ee$  values were determined by chiral column HPLC: Chiracel OD-H, *n*-hexane/*i*-PrOH (99/1), 0.9 mL min<sup>-1</sup>, detection at 210 nm,  $t_{(S,R)} = 17.8$  min,  $t_{(R,S)} = 12.1$  min. The major diastereomer was isolated by column chromatography (CH<sub>2</sub>Cl<sub>2</sub> + 1% Et<sub>2</sub>O).

**C<sub>19</sub>H<sub>23</sub>NO<sub>3</sub>**, MW: 313.39 g mol<sup>-1</sup>.  $[\alpha]_D^{20}$ : +9.4 (c = 0.01, CH<sub>2</sub>Cl<sub>2</sub>). **<sup>1</sup>H NMR (300 MHz, CDCl<sub>3</sub>, 21 °C) of the (S,R)/(R,S)-diastereomer:** δ = 7.60-7.57 (m, 2H, arom. H), 7.46-7.36 (m, 3H, arom. H), 2.86-2.75 (m, 1H, CH), 2.65-2.49 (m, 2H, CH<sub>2</sub>), 2.45-2.25 (m, 2H, CH<sub>2</sub>), 2.07-1.98 (m, 1H, CH<sub>2</sub>), 1.63-1.45 (m, 3H, CH<sub>2</sub>), 1.42 (s, 9H, CH<sub>3</sub>). **<sup>13</sup>C NMR (75 MHz, CDCl<sub>3</sub>, 21 °C) of the (S,R)/(R,S)-diastereomer:** δ = 208.9, 165.6, 132.3, 129.3, 129.1, 126.2, 116.8, 84.9, 60.5, 45.2, 42.5, 41.0, 28.2, 27.6, 24.3. **IR (solid) of the (S,R)/(R,S)-diastereomer:** ν = 2982, 2964, 2942, 2876, 2247, 1729, 1708, 1494, 1449, 1392, 1369, 1251, 1233, 1145, 119, 1077, 1034.

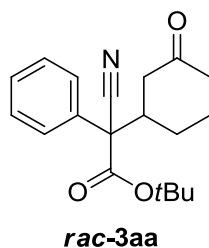

According to GP2 *tert*-butyl-2-cyano-2-phenylacetate **1a** (47.0 mg, 0.22 mmol, 1 equiv) was treated with 2-cyclohexen-1-one **2a** (21.3 μL, 0.22 mmol, 1 equiv). Column chromatography (petrol ether:EtOAc = 9:1 → 4:1) of the crude product yielded **rac-3aa** (58.0 mg, 0.19 mmol, 86%) as a colorless oil with a  $dr_{(R,R+S,S):(S,R+R,S)}$  of 43:57.

**C<sub>19</sub>H<sub>23</sub>NO<sub>3</sub>**, MW: 313.39 g mol<sup>-1</sup>. **MS (ESI)  $m/z$ :** 336.16 ([M+Na]<sup>+</sup>, 100%), 259.12 ([M+Na - C<sub>6</sub>H<sub>5</sub>]<sup>+</sup>, 44%). **HRMS (ESI)  $m/z$ :** Calc. for [M+Na]<sup>+</sup>: 336.1570. Found: 336.1581.

**Microanalysis:** Calc. for C<sub>19</sub>H<sub>23</sub>NO<sub>3</sub>: C: 71.56; H: 6.71; N: 4.91. Found: C: 71.38; H: 6.65; N: 4.86.

***tert*-Butyl-2-cyano-2-(3-oxocyclohexyl)-2-(3-(trifluoromethyl)phenyl)-acetate (3ba)**

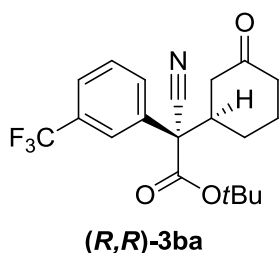

According to GP3 *tert*-butyl-2-cyano-2-(3-(trifluoromethyl)phenyl)acetate **1b** (40.1 mg, 0.14 mmol, 1 equiv) was treated with 2-cyclohexen-1-one **2a** (27.0 mg, 0.28 mmol, 2 equiv) in the presence of **FBIP-O<sub>2</sub>CC<sub>3</sub>F<sub>7</sub>** (1.16 mg, 0.70 μmol, 0.5 mol%) to yield (*R,R*)-**3ba** (52.9 mg, 0.14 mmol, 99%, *ee*<sub>(*R,R*)</sub> = 85%, *ee*<sub>(*S,S*)</sub> = 52%, *dr*<sub>(*R,R+S,S*):(*S,R+R,S*)</sub> = 76:24) as a colorless solid. The *dr* and *ee* values were determined by chiral column HPLC: Chiracel AS-H, *n*-hexane/*i*-PrOH (97:3), 1 mL min<sup>-1</sup>, detection at 210 nm, *t*<sub>(*R,R*)</sub> = 8.4 min, *t*<sub>(*S,S*)</sub> = 30.4 min. The major diastereomer was isolated by column chromatography (CH<sub>2</sub>Cl<sub>2</sub> + 1% Et<sub>2</sub>O).

**C<sub>20</sub>H<sub>22</sub>NO<sub>3</sub>F<sub>3</sub>**, MW: 381.39 g mol<sup>-1</sup>. **Mp**: 106.3-107.2 °C. [ $\alpha$ ]<sub>D</sub><sup>20</sup>: +21.6 (c = 0.005, CH<sub>2</sub>Cl<sub>2</sub>). **<sup>1</sup>H NMR (300 MHz, CDCl<sub>3</sub>, 21 °C) of the (*R,R*)/(*S,S*)-diastereomer:**  $\delta$  = 7.81 (*s*, 1H, arom. *H*), 7.76 (*d*, *J* = 8.1, 1H, arom. *H*) 7.67 (*d*, *J* = 8.6, 1H, arom. *H*), 7.56 (*t*, *J* = 7.7, 1H, arom. *H*), 2.86-2.75 (*m*, 1H, *CH*), 2.47-2.29 (*m*, 2H, *CH*<sub>2</sub>), 2.27-2.09 (*m*, 3H, *CH*<sub>2</sub>), 1.94-1.66 (*m*, 3H, *CH*<sub>2</sub>), 1.45 (*s*, 9H, *CH*<sub>3</sub>). **<sup>13</sup>C NMR (75 MHz, CDCl<sub>3</sub>, 21 °C) of the (*R,R*)/(*S,S*)-diastereomer:**  $\delta$  = 208.3, 165.1, 133.5, 132.1, 131.7, 130.0, 129.6, 126.2 (*m*, C<sub>3</sub>CF<sub>3</sub>), 123.0 (*m*, C<sub>3</sub>CF<sub>3</sub>), 116.2, 85.7, 60.4, 45.2, 42.5, 40.9, 28.1, 27.6, 24.1. **<sup>19</sup>F NMR (235 MHz, CDCl<sub>3</sub>, 21 °C) of the (*R,R*)/(*S,S*)-diastereomer:**  $\delta$  = -62.70 (*s*, 3F). **IR (solid) of the (*R,R*)/(*S,S*)-diastereomer:**  $\nu$  = 2958, 2244, 1732, 1716, 1444, 1367, 1326, 1253, 1228, 1163, 1149, 1126, 1078.

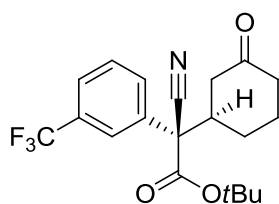

**(S,R)-3ba**

According to GP3 *tert*-butyl-2-cyano-2-(3-(trifluoromethyl)phenyl)acetate **1b** (19.7 mg, 69  $\mu$ mol, 1 equiv) was treated with 2-cyclohexen-1-one **2a** (13.3 mg, 13.8 mmol, 2 equiv) in the presence of **FIP-O<sub>2</sub>CC<sub>3</sub>F<sub>7</sub>** (0.90 mg, 0.70  $\mu$ mol, 1 mol%) to yield **(S,R)-3ba** (24.6 mg, 0.06 mmol, 92%,  $ee_{(S,R)} = 74%$ ,  $ee_{(R,R)} = 12%$ ,  $dr_{(S,R+S):(R,R+S,S)} = 63:37$ ) as a colorless oil. The  $dr$  and  $ee$  values were determined by chiral column HPLC: Chiracel AS-H, *n*-hexane/*i*-PrOH (97:3), 1 mL min<sup>-1</sup>, detection at 210 nm,  $t_{(S,R)} = 9.7$  min,  $t_{(R,S)} = 13.5$  min. The major diastereomer was isolated by column chromatography (CH<sub>2</sub>Cl<sub>2</sub> + 1% Et<sub>2</sub>O).

**C<sub>20</sub>H<sub>22</sub>NO<sub>3</sub>F<sub>3</sub>**, MW: 381.39 g mol<sup>-1</sup>. [ $\alpha$ ]<sub>D</sub><sup>20</sup>: +5.7 (c = 0.26, CH<sub>2</sub>Cl<sub>2</sub>). **<sup>1</sup>H NMR (300 MHz, CDCl<sub>3</sub>, 21 °C) of the (S,R)/(R,S)-diastereomer:**  $\delta = 7.86$  (*s*, 1H, arom. *H*), 7.83 (*d*, *J* = 8.4, 1H, arom. *H*) 7.69 (*d*, *J* = 7.7, 1H, arom. *H*), 7.58 (*t*, *J* = 7.7, 1H, arom. *H*), 2.85-2.75 (*m*, 1H, CH), 2.65-2.50 (*m*, 2H, CH<sub>2</sub>), 2.46-2.26 (*m*, 2H, CH<sub>2</sub>), 2.11-2.00 (*m*, 1H, CH<sub>2</sub>), 1.62-1.49 (*m*, 2H, CH<sub>2</sub>), 1.44 (*s*, 9H, CH<sub>3</sub>), 1.38-1.35 (*m*, 1H, CH<sub>2</sub>). **<sup>13</sup>C NMR (75 MHz, CDCl<sub>3</sub>, 21 °C) of the (S,R)/(R,S)-diastereomer:**  $\delta = 208.0$ , 164.6, 134.2, 132.0, 131.6, 129.9, 126.0 (*m*, CCCC<sub>3</sub>F<sub>3</sub>), 123.2 (*m*, CCCC<sub>3</sub>F<sub>3</sub>), 116.3, 85.8, 60.6, 45.5, 44.4, 40.7, 27.6, 25.8, 23.9. **<sup>19</sup>F NMR (235 MHz, CDCl<sub>3</sub>, 21 °C) of the (S,R)/(R,S)-diastereomer:**  $\delta = -62.69$  (*s*, 3F). **IR (solid) of the (S,R)/(R,S)-diastereomer:**  $\nu = 2958$ , 1727, 1713, 1446, 1437, 1371, 1326, 1259, 1231, 1166, 1150, 1077.

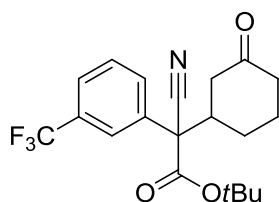

**rac-3ba**

According to GP2 *tert*-butyl-2-cyano-2-(3-(trifluoromethyl)phenyl)acetate **1b** (146.4 mg, 0.51 mmol, 1 equiv) was treated with 2-cyclohexen-1-one **2a** (49.3 mg, 0.51 mmol, 1 equiv). Column chromatography (petrol ether:EtOAc = 9:1  $\rightarrow$  4:1) of the crude product yielded **rac-3ba** (170.7 mg, 0.45 mmol, 87%) as a colorless solid with a  $dr_{(R,R+S,S):(S,R+S,S)}$  of 45:55.

$C_{20}H_{22}NO_3F_3$ , MW: 381.39 g mol<sup>-1</sup>. Mp: 69.1-69.3 °C. HRMS (ESI) *m/z*: Calc. for [C<sub>14</sub>H<sub>14</sub>F<sub>3</sub>NO<sub>2</sub>]<sup>-</sup>: 284.0898. Found: 284.0895. Microanalysis: Calc. for C<sub>20</sub>H<sub>22</sub>NO<sub>3</sub>F<sub>3</sub>: C: 62.98; H: 5.81; N: 3.67. Found: C: 63.06; H: 5.85; N: 3.71.

### ***tert*-Butyl-2-cyano-2-(3-bromophenyl)-2-(3-oxocyclohexyl)acetate (3ca)**

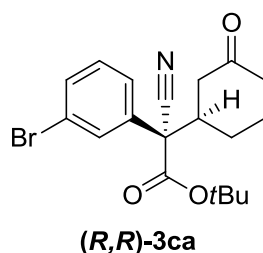

According to GP3 *tert*-butyl-2-cyano-2-(3-bromophenyl)acetate **1c** (11.8 mg, 40 μmol, 1 equiv) was treated with 2-cyclohexen-1-one **2a** (7.7 mg, 80 μmol, 2 equiv) in the presence of **FBIP-O<sub>2</sub>CC<sub>3</sub>F<sub>7</sub>** (1.32 mg, 0.80 μmol, 1 mol%) to yield (***R,R***)-**3ca** (14.8 mg, 38 μmol, 94%, *ee*<sub>(*R,R*)</sub> = 78%, *ee*<sub>(*S,R*)</sub> = 54%, *dr*<sub>(*R,R+S,S*):(*S,R+R,S*)</sub> = 77:23) as a colorless solid. The *dr* and *ee* values were determined by chiral column HPLC: Chiracel AS-H, *n*-hexane/*i*-PrOH (97:3), 1 mL min<sup>-1</sup>, detection at 210 nm, *t*<sub>(*R,R*)</sub> = 12.7 min, *t*<sub>(*S,S*)</sub> = 50.0 min. The major diastereomer was isolated by column chromatography (CH<sub>2</sub>Cl<sub>2</sub> + 1% Et<sub>2</sub>O).

$C_{19}H_{22}NO_3Br$ , MW: 392.29 g mol<sup>-1</sup>. Mp: 134.7-135.2 °C. [ $\alpha$ ]<sub>D</sub><sup>20</sup>: +20.9 (c = 0.01, CH<sub>2</sub>Cl<sub>2</sub>). <sup>1</sup>H NMR (300 MHz, CDCl<sub>3</sub>, 21 °C) of the (***R,R***)/(***S,S***)-diastereomer:  $\delta$  = 7.70 (*t*, *J* = 1.9, 1H, arom. *H*), 7.54-7.46 (*m*, 2H, arom. *H*), 7.28-7.26 (*m*, 1H, arom. *H*), 2.81-2.70 (*m*, 1H, *CH*), 2.46-2.26 (*m*, 2H, *CH*<sub>2</sub>), 2.22-2.06 (*m*, 3H, *CH*<sub>2</sub>), 1.91-1.64 (*m*, 3H, *CH*<sub>2</sub>), 1.45 (*s*, 9H, *CH*<sub>3</sub>). <sup>13</sup>C NMR (75 MHz, CDCl<sub>3</sub>, 21 °C) of the (***R,R***)/(***S,S***)-diastereomer:  $\delta$  = 208.6, 165.1, 134.5, 132.4, 130.8, 129.2, 124.8, 123.5, 116.3, 85.5, 60.1, 45.1, 42.5, 40.9, 28.1, 27.6, 24.2. IR (solid) of the (***R,R***)/(***S,S***)-diastereomer:  $\nu$  = 3080, 3057, 2979, 2941, 2873, 2245, 1736, 1712, 1568, 1476, 1419, 1392, 1369, 1253, 1229, 1149, 1079, 1060.



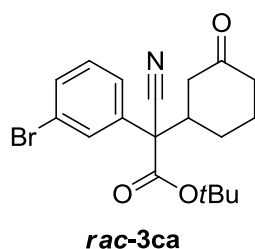

According to GP2 *tert*-butyl-2-cyano-2-(3-bromophenyl)acetate **1c** (246.5 mg, 0.83 mmol, 1 equiv) was treated with 2-cyclohexen-1-one **2a** (80.0 mg, 0.83 mmol, 1 equiv). Column chromatography (petrol ether:EtOAc = 9:1 → 4:1) of the crude product yielded **rac-3ca** (276.2 mg, 0.70 mmol, 85%) as a colorless solid with a  $dr_{(R,R+S,S):(S,R+R,S)}$  of 45:55. The diastereomers were separated by column chromatography (CH<sub>2</sub>Cl<sub>2</sub> + 1% Et<sub>2</sub>O).

**C<sub>19</sub>H<sub>22</sub>NO<sub>3</sub>Br**, MW: 392.29 g mol<sup>-1</sup>. **Mp**: 120.9-121.1 °C. **<sup>1</sup>H NMR (300 MHz, CDCl<sub>3</sub>, 21 °C) of the (S,R)/(R,S)-diastereomer**: δ = 7.76 (*t*, *J* = 1.9, 1H, arom. *H*), 7.54 (*dd*, *J* = 7.9, 1.9, 2H, arom. *H*), 7.33-7.28 (*m*, 1H, arom. *H*), 2.81-2.70 (*m*, 1H, *CH*), 2.64-2.56 (*m*, 2H, *CH*<sub>2</sub>), 2.51-2.41 (*m*, 2H, *CH*<sub>2</sub>), 2.36-2.25 (*m*, 1H, *CH*<sub>2</sub>), 2.10-2.01 (*m*, 1H, *CH*<sub>2</sub>), 1.56-1.47 (*m*, 2H, *CH*<sub>2</sub>), 1.44 (*s*, 9H, *CH*<sub>3</sub>). **<sup>13</sup>C NMR (75 MHz, CDCl<sub>3</sub>, 21 °C) of the (S,R)/(R,S)-diastereomer**: δ = 208.2, 164.7, 135.2, 132.3, 130.7, 129.4, 125.0, 123.3, 116.4, 85.6, 60.2, 45.4, 44.4, 40.7, 27.6, 25.8, 23.9. **IR (solid) of the (S,R)/(R,S)-diastereomer**: ν = 3065, 2978, 2946, 2873, 2248, 1726, 1709, 1595, 1567, 1475, 1419, 1370, 1279, 1255, 1226, 1144, 1069. **MS (EI) *m/z***: Found: 393.1 ([*M*]<sup>+</sup>, 1%), 376.1 ([*M* - CH<sub>3</sub>]<sup>+</sup>, 17%), 290.0 ([*M* - CO<sub>2</sub>*t*-Bu]<sup>+</sup>, 8%), 97.1 ([oxo-Cyclohexyl]<sup>+</sup>, 9%), 57.1 ([C(CH<sub>3</sub>)<sub>3</sub>]<sup>+</sup>, 100%). **Microanalysis**: Calc. for C<sub>19</sub>H<sub>22</sub>NO<sub>3</sub>Br: C: 58.17; H: 5.65; N: 3.57; Br: 20.37. Found: C: 58.10; H: 5.68; N: 3.52; Br: 20.15.

### ***tert*-Butyl-2-cyano-2-(3-chlorophenyl)-2-(3-oxocyclohexyl)acetate (3da)**

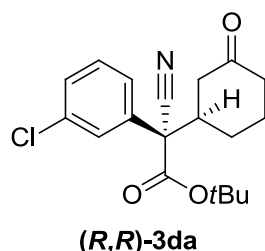

According to GP3 *tert*-butyl-2-cyano-2-(3-chlorophenyl)acetate **1d** (41.1 mg, 0.16 mmol, 1 equiv) was treated with 2-cyclohexen-1-one **2a** (30.7 mg, 0.32 mmol, 2 equiv) in the presence of **FBIP-O<sub>2</sub>CC<sub>3</sub>F<sub>7</sub>** (1.35 mg, 0.32 μmol, 0.5 mol%) to yield **(R,R)-3da** (54.0 mg, 0.16 mmol, 97%,  $ee_{(R,R)} = 87%$ ,  $ee_{(S,R)} = 78%$ ,  $dr_{(R,R+S,S):(S,R+R,S)} = 83:17$ ) as a colorless solid. The

*dr* and *ee* values were determined by chiral column HPLC: Chiracel AS-H, *n*-hexane/*i*-PrOH (97:3), 1 mL min<sup>-1</sup>, detection at 210 nm, *t*<sub>(*R,R*)</sub> = 11.5 min, *t*<sub>(*S,S*)</sub> = 45.3 min. The major diastereomer was isolated by column chromatography (CH<sub>2</sub>Cl<sub>2</sub> + 1% Et<sub>2</sub>O).

**C<sub>19</sub>H<sub>22</sub>NO<sub>3</sub>Cl**, MW: 347.84 g mol<sup>-1</sup>. **Mp**: 124.5-125.8 °C. [ $\alpha$ ]<sub>D</sub><sup>20</sup>: +32.4 (c = 0.26, CH<sub>2</sub>Cl<sub>2</sub>). **<sup>1</sup>H NMR (300 MHz, CDCl<sub>3</sub>, 21 °C) of the (*R,R*)/(*S,S*)-diastereomer:**  $\delta$  = 7.54 (*b*, 1H, *o*-*H*), 7.44 (*dt*, *J* = 6.8, 2.1, 1H, arom. *H*), 7.39–7.34 (*m*, 2H, arom. *H*), 2.82–2.71 (*m*, 1H, *CH*), 2.47-2.40 (*m*, 1H, *CH*<sub>2</sub>), 2.37-2.26 (*m*, 1H, *CH*<sub>2</sub>), 2.23-2.06 (*m*, 3H, *CH*<sub>2</sub>), 1.91-1.64 (*m*, 3H, *CH*<sub>2</sub>), 1.45 (*s*, 9H, *CH*<sub>3</sub>). **<sup>13</sup>C NMR (75 MHz, CDCl<sub>3</sub>, 21 °C) of the (*R,R*)/(*S,S*)-diastereomer:**  $\delta$  = 208.6, 165.1, 135.4, 134.3, 130.5, 129.5, 126.4, 124.3, 116.3, 85.4, 60.2, 45.1, 42.5, 40.9, 28.1, 27.6, 24.2. **IR (solid) of the (*R,R*)/(*S,S*)-diastereomer:**  $\nu$  = 2982, 2958, 2934, 2869, 2245, 1740, 1714, 1596, 1574, 1476, 1423, 1372, 1251, 1229, 1150, 1085, 1061, 1038.

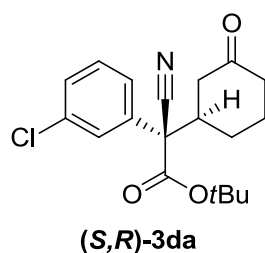

According to GP3 *tert*-butyl-2-cyano-2-(3-chlorophenyl)acetate **1d** (10.2 mg, 41  $\mu$ mol, 1 equiv) was treated with 2-cyclohexen-1-one **2a** (7.8 mg, 81  $\mu$ mol, 2 equiv) in the presence of **FIP-O<sub>2</sub>CC<sub>3</sub>F<sub>7</sub>** (0.26 mg, 0.20  $\mu$ mol, 0.5 mol%) to yield (*S,R*)-**3da** (14.1 mg, 41  $\mu$ mol, 99%, *ee*<sub>(*S,R*)</sub> = 77%, *ee*<sub>(*R,R*)</sub> = 7%, *dr*<sub>(*S,R+R,S*):(*R,R+S,S*)</sub> = 50:50) as a colorless solid. The *dr* and *ee* values were determined by chiral column HPLC: Chiracel AS-H, *n*-hexane/*i*-PrOH (97:3), 1 mL min<sup>-1</sup>, detection at 210 nm, *t*<sub>(*S,R*)</sub> = 14.0 min, *t*<sub>(*R,S*)</sub> = 18.9 min. The major diastereomer was isolated by column chromatography (CH<sub>2</sub>Cl<sub>2</sub> + 1% Et<sub>2</sub>O).

**C<sub>19</sub>H<sub>22</sub>NO<sub>3</sub>Cl**, MW: 347.84 g mol<sup>-1</sup>. **Mp**: 103.1-103.5 °C. [ $\alpha$ ]<sub>D</sub><sup>20</sup>: +7.3 (c = 0.22, CH<sub>2</sub>Cl<sub>2</sub>). **<sup>1</sup>H NMR (300 MHz, CDCl<sub>3</sub>, 21 °C) of the (*S,R*)/(*R,S*)-diastereomer:**  $\delta$  = 7.61 (*m*, 1H, *o*-*H*), 7.53-7.48 (*m*, 1H, arom. *H*), 7.40-7.34 (*m*, 2H, arom. *H*), 2.82-2.71 (*m*, 1H, *CH*), 2.64-2.56 (*m*, 2H, *CH*<sub>2</sub>), 2.48-2.41 (*m*, 1H, *CH*<sub>2</sub>), 2.37-2.26 (*m*, 1H, *CH*<sub>2</sub>), 2.10-2.00 (*m*, 1H, *CH*<sub>2</sub>), 1.65-1.47 (*m*, 3H, *CH*<sub>2</sub>), 1.44 (*s*, 9H, *CH*<sub>3</sub>). **<sup>13</sup>C NMR (75 MHz, CDCl<sub>3</sub>, 21 °C) of the (*S,R*)/(*R,S*)-diastereomer:**  $\delta$  = 208.2, 164.7, 135.3, 135.0, 130.4, 129.4, 126.6, 124.5, 116.4, 85.6, 60.3, 45.4,

44.4, 40.7, 27.6, 25.8, 23.9. **IR (solid) of the (S,R)/(R,S)-diastereomer:**  $\nu = 3070, 2980, 2934, 2874, 2250, 1725, 1710, 1594, 1574, 1478, 1422, 1371, 1279, 1256, 1226, 1145, 1069.$

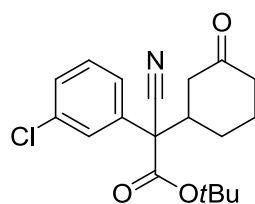

**rac-3da**

According to GP2 *tert*-butyl-2-cyano-2-(3-chlorophenyl)acetate **1d** (141.0 mg, 0.56 mmol, 1 equiv) was treated with 2-cyclohexen-1-one **2a** (53.8 mg, 0.56 mmol, 1 equiv). Column chromatography (petrol ether:EtOAc = 9:1 → 4:1) of the crude product yielded **rac-3da** (157.1 mg, 0.45 mmol, 81%) as a colorless solid with a  $dr_{(R,R+S,S):(S,R+R,S)}$  of 42:58.

**C<sub>19</sub>H<sub>22</sub>NO<sub>3</sub>Cl**, MW: 347.84 g mol<sup>-1</sup>. **Mp:** 109.7-110.1 °C. **MS (ESI) *m/z*:** Found: 370.12 ([M + Na]<sup>+</sup>, 100%), 314.05 ([M - C(CH<sub>3</sub>)<sub>3</sub> + Na]<sup>+</sup>, 53%). **Microanalysis:** Calc. for C<sub>19</sub>H<sub>22</sub>NO<sub>3</sub>Cl: C: 65.61; H: 6.38; N: 4.03; Cl: 10.19. Found: C: 65.32; H: 6.34; N: 3.97; Cl: 10.49.

### ***tert*-Butyl-2-cyano-2-(3-methoxyphenyl)-2-(3-oxocyclohexyl)-acetate (3ea)**

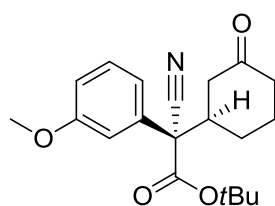

**(R,R)-3ea**

According to GP3 *tert*-butyl-2-cyano-2-(3-methoxyphenyl)acetate **1e** (40.7 mg, 0.16 mmol, 1 equiv) was treated with 2-cyclohexen-1-one **2a** (31.6 mg, 0.33 mmol, 2 equiv) in the presence of **FBIP-O<sub>2</sub>CC<sub>3</sub>F<sub>7</sub>** (2.72 mg, 1.65 μmol, 1 mol%) to yield **(R,R)-3ea** (54.4 mg, 0.16 mmol, 99%,  $ee_{(R,R)} = 93%$ ,  $ee_{(S,S)} = 72%$ ,  $dr_{(R,R+S,S):(S,R+R,S)} = 89:11$ ) as a colorless solid. The  $dr$  and  $ee$  values were determined by chiral column HPLC: Chiracel AS-H, *n*-hexane/*i*-PrOH (97:3), 1 mL min<sup>-1</sup>, detection at 210 nm,  $t_{(R,R)} = 16.8$  min,  $t_{(S,S)} = 48.3$  min. The major diastereomer was isolated by column chromatography (CH<sub>2</sub>Cl<sub>2</sub> + 1% Et<sub>2</sub>O).

**C<sub>20</sub>H<sub>25</sub>NO<sub>4</sub>**, MW: 343.42 g mol<sup>-1</sup>. **Mp**: 118.3-118.7 °C. [ $\alpha$ ]<sub>D</sub><sup>20</sup>: +25.8 (c = 0.01, CH<sub>2</sub>Cl<sub>2</sub>). **<sup>1</sup>H NMR (300 MHz, CDCl<sub>3</sub>, 21 °C) of the (R,R)/(S,S)-diastereomer**:  $\delta$  = 7.30 (t, J = 8.0, 1H, *o*-H), 7.09 (ddd, J = 7.9, 1.8, 0.6, 1H, arom. H), 7.06 (t, J = 2.3, 2H, arom. H), 6.89 (ddd, J = 8.3, 2.3, 0.6, 1H, arom. H), 3.81 (s, 3H, OCH<sub>3</sub>), 2.82-2.71 (m, 1H, CH), 2.45-2.39 (m, 1H, CH<sub>2</sub>), 2.36-2.25 (m, 1H, CH<sub>2</sub>), 2.21-2.07 (m, 3H, CH<sub>2</sub>), 1.98-1.64 (m, 3H, CH<sub>2</sub>), 1.44 (s, 9H, CH<sub>3</sub>). **<sup>13</sup>C NMR (75 MHz, CDCl<sub>3</sub>, 21 °C) of the (R,R)/(S,S)-diastereomer**:  $\delta$  = 209.1, 165.5, 160.2, 133.7, 130.3, 118.2, 116.8, 114.3, 112.1, 84.9, 60.4, 55.3, 45.0, 42.5, 41.0, 28.2, 27.6, 24.3. **IR (solid) of the (R,R)/(S,S)-diastereomer**:  $\nu$  = 2981, 2951, 2244, 1733, 1712, 1600, 1497, 1448, 1369, 1296, 1250, 1230, 1149, 1036.

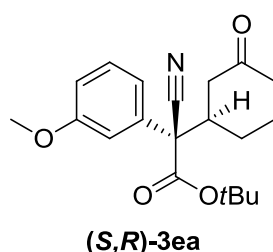

According to GP3 *tert*-butyl-2-cyano-2-(3-methoxyphenyl)acetate **1e** (19.8 mg, 80  $\mu$ mol, 1 equiv) was treated with 2-cyclohexen-1-one **2a** (15.4 mg, 0.16 mmol, 2 equiv) in the presence of **FIP-O<sub>2</sub>CC<sub>3</sub>F<sub>7</sub>** (0.52 mg, 0.40  $\mu$ mol, 0.5 mol%) to yield **(S,R)-3ea** (20.3 mg, 59  $\mu$ mol, 74%,  $ee_{(S,R)} = 90\%$ ,  $ee_{(R,R)} = 46\%$ ,  $dr_{(S,R+R,S):(R,R+S,S)} = 68:32$ ) as a colorless oil. The  $dr$  and  $ee$  values were determined by chiral column HPLC: Chiracel AS-H, *n*-hexane/*i*-PrOH (97:3), 1 mL min<sup>-1</sup>, detection at 210 nm,  $t_{(S,R)} = 24.6$  min,  $t_{(R,S)} = 19.6$  min. The minor diastereomer was partially removed by column chromatography (CH<sub>2</sub>Cl<sub>2</sub> + 1% Et<sub>2</sub>O).

**C<sub>20</sub>H<sub>25</sub>NO<sub>4</sub>**, MW: 343.42 g mol<sup>-1</sup>. [ $\alpha$ ]<sub>D</sub><sup>20</sup>: +5.8 (c = 0.21, CH<sub>2</sub>Cl<sub>2</sub>). **<sup>1</sup>H NMR (300 MHz, CDCl<sub>3</sub>, 21 °C) of the (S,R)/(R,S)-diastereomer [(R,R)/(S,S)-diastereomer]**:  $\delta$  = 7.32 (q, J = 7.8, 1H, *o*-H), 7.18-7.05 (m, 2H, arom. H), 6.90 (tdd, J = 7.9, 2.3, 0.6, 1H, arom. H), 3.83 (s, 3H, OCH<sub>3</sub>), [3.82 (s, 3H, OCH<sub>3</sub>)], 2.82-2.72 (m, 1H, CH), 2.64-2.52 (m, 2H, CH<sub>2</sub>), 2.48-2.39 (m, 1H, CH<sub>2</sub>), 2.36-2.25 (m, 1H, CH<sub>2</sub>), 2.21-1.98 (m, 2H, CH<sub>2</sub>), 1.96-1.64 (m, 1H, CH<sub>2</sub>), 1.54-1.46 (m, 1H, CH<sub>2</sub>), [1.44 (s, 9H, CH<sub>3</sub>)], 1.43 (s, 9H, CH<sub>3</sub>). **<sup>13</sup>C NMR (63 MHz, CDCl<sub>3</sub>, 21 °C) of the (S,R)/(R,S)-diastereomer [(R,R)/(S,S)-diastereomer]**:  $\delta$  = [209.1], 208.7, [165.1], 160.3, 134.5, [130.3], 130.2, 118.5, [118.3], 116.9, [114.3], 114.2, 112.3, [112.1], 85.0, 60.6, 55.4, 45.3, [45.1], 44.6, [42.6], 40.8, [28.2], 27.6, 25.8, [24.3], 24.1. **IR (solid) of the (S,R)/(R,S)-**

**diastereomer:**  $\nu = 3003, 2981, 2957, 2868, 2242, 1735, 1711, 1608, 1585, 1489, 1444, 1369, 1297, 1248, 1230, 1201, 1147, 1041$ .

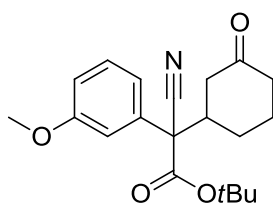

**rac-3ea**

According to GP2 *tert*-butyl-2-cyano-2-(3-methoxyphenyl)acetate **1e** (249.3 mg, 1.01 mmol, 1 equiv) was treated with 2-cyclohexen-1-one **2a** (96.9 mg, 1.01 mmol, 1 equiv). Column chromatography (petrol ether:EtOAc = 9:1 → 4:1) of the crude product yielded **rac-3ea** (321.2 mg, 0.94 mmol, 93%) as a colorless oil with a  $dr_{(R,R+S,S):(S,R+R,S)}$  of 38:62.

**C<sub>20</sub>H<sub>25</sub>NO<sub>4</sub>**, MW: 343.42 g mol<sup>-1</sup>. **HRMS (ESI) *m/z***: Calc. for [C<sub>20</sub>H<sub>25</sub>NO<sub>4</sub> + Na]<sup>+</sup>: 366.1681. Found: 366.1677. **Microanalysis**: Calc. for C<sub>20</sub>H<sub>25</sub>NO<sub>4</sub>: C: 69.95; H: 7.34; N: 4.08. Found: C: 69.71; H: 7.31; N: 4.06.

### ***tert*-Butyl-2-cyano-2-(3-oxocyclohexyl)-2-(*m*-tolyl)-acetate (**3fa**)**

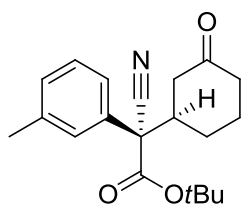

**(*R,R*)-3fa**

According to GP3 *tert*-butyl-2-cyano-2-(*m*-tolyl)acetate **1f** (41.0 mg, 0.18 mmol, 1 equiv) was treated with 2-cyclohexen-1-one **2a** (34.1 mg, 0.35 mmol, 2 equiv) in the presence of **FBIP-O<sub>2</sub>CC<sub>3</sub>F<sub>7</sub>** (2.93 mg, 1.8 μmol, 1 mol%) to yield **(*R,R*)-3fa** (49.3 mg, 0.15 mmol, 85%,  $ee_{(R,R)} = 95%$ ,  $ee_{(S,R)} = 71%$ ,  $dr_{(R,R+S,S):(S,R+R,S)} = 87:13$ ) as a colorless solid. The  $dr$  and  $ee$  values were determined by chiral column HPLC: Chiracel OD-H, *n*-hexane/*i*-PrOH (99.5/0.5), 1 mL min<sup>-1</sup>, detection at 210 nm,  $t_{(R,R)} = 14.4$  min,  $t_{(S,S)} = 35.5$  min. The major diastereomer was isolated by column chromatography (CH<sub>2</sub>Cl<sub>2</sub> + 1% Et<sub>2</sub>O).

**C<sub>20</sub>H<sub>25</sub>NO<sub>3</sub>**, MW: 327.42 g mol<sup>-1</sup>. **Mp**: 103.9-104.4 °C. **[α]<sub>D</sub><sup>20</sup>**: +31.1 (c = 0.01, CH<sub>2</sub>Cl<sub>2</sub>). **<sup>1</sup>H NMR (300 MHz, CDCl<sub>3</sub>, 21 °C) of the (*R,R*)/(*S,S*)-diastereomer**:  $\delta = 7.31-7.24$  (*m*, 3H, arom).

*H*), 7.16 (*d*,  $J = 6.6$ , 1H, arom. *H*), 2.84-2.73 (*m*, 1H, *CH*), 2.45-2.39 (*m*, 1H, *CH*<sub>2</sub>), 2.37 (*s*, 3H, *CH*<sub>3</sub>), 2.34-2.25 (*m*, 1H, *CH*<sub>2</sub>), 2.22-2.06 (*m*, 3H, *CH*<sub>2</sub>), 1.93-1.64 (*m*, 3H, *CH*<sub>2</sub>), 1.43 (*s*, 9H, *CH*<sub>3</sub>). <sup>13</sup>C NMR (75 MHz, CDCl<sub>3</sub>, 21 °C) of the (*R,R*)/(*S,S*)-diastereomer:  $\delta = 209.2, 165.7, 139.2, 132.1, 129.9, 129.1, 126.6, 123.0, 116.9, 84.8, 60.4, 44.9, 42.6, 41.0, 28.2, 27.6, 24.3, 21.5$ . IR (solid) of the (*R,R*)/(*S,S*)-diastereomer:  $\nu = 2969, 2956, 2930, 2864, 2245, 1732, 1712, 1605, 1450, 1419, 1390, 1368, 1251, 1227, 1150, 1058, 1041$ .

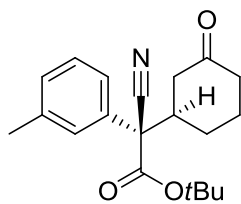

(*S,R*)-3fa

According to GP3 *tert*-butyl-2-cyano-2-(*m*-tolyl)acetate **1f** (20.3 mg, 88  $\mu$ mol, 1 equiv) was treated with 2-cyclohexen-1-one **2a** (16.9 mg, 0.18 mmol, 2 equiv) in the presence of **FIP-O<sub>2</sub>CC<sub>3</sub>F<sub>7</sub>** (0.57 mg, 0.44  $\mu$ mol, 0.5 mol%) to yield (*S,R*)-3fa (19.6 mg, 60  $\mu$ mol, 68%,  $ee_{(S,R)} = 91\%$ ,  $ee_{(R,R)} = 60\%$ ,  $dr_{(S,R+R,S):(R,R+S,S)} = 63:37$ ) as a colorless oil. The *dr* and *ee* values were determined by chiral column HPLC: Chiracel OD-H, *n*-hexane/*i*-PrOH (99.5/0.5), 1 mL min<sup>-1</sup>, detection at 210 nm,  $t_{(S,R)} = 16.0$  min,  $t_{(R,S)} = 12.8$  min. The major diastereomer was isolated by column chromatography (CH<sub>2</sub>Cl<sub>2</sub> + 1% Et<sub>2</sub>O).

C<sub>20</sub>H<sub>25</sub>NO<sub>3</sub>, MW: 327.42 g mol<sup>-1</sup>.  $[\alpha]_D^{20}$ : +14.7 ( $c = 0.27$ , CH<sub>2</sub>Cl<sub>2</sub>). <sup>1</sup>H NMR (300 MHz, CDCl<sub>3</sub>, 21 °C) of the (*S,R*)/(*R,S*)-diastereomer:  $\delta = 7.38-7.35$  (*m*, 2H, arom. *H*), 7.30 (*t*,  $J = 7.7$ , 1H, arom. *H*), 7.19 (*d*,  $J = 7.1$ , 1H, arom. *H*), 2.84-2.73 (*m*, 1H, *CH*), 2.65-2.59 (*m*, 1H, *CH*<sub>2</sub>), 2.57-2.48 (*m*, 1H, *CH*<sub>2</sub>), 2.39 (*s*, 3H, *CH*<sub>3</sub>), 2.36-2.25 (*m*, 1H, *CH*<sub>2</sub>), 2.09-1.98 (*m*, 1H, *CH*<sub>2</sub>), 1.63-1.45 (*m*, 3H, *CH*<sub>2</sub>), 1.42 (*s*, 9H, *CH*<sub>3</sub>). <sup>13</sup>C NMR (75 MHz, CDCl<sub>3</sub>, 21 °C) of the (*S,R*)/(*R,S*)-diastereomer:  $\delta = 208.8, 165.2, 139.1, 132.9, 129.7, 129.0, 126.9, 123.2, 117.0, 84.9, 60.5, 45.2, 44.6, 40.8, 27.6, 25.8, 24.1, 21.6$ . IR (solid) of the (*S,R*)/(*R,S*)-diastereomer:  $\nu = 2979, 2935, 2876, 2242, 1718, 1606, 1446, 1367, 1284, 1257, 1232, 1148, 1072$ .

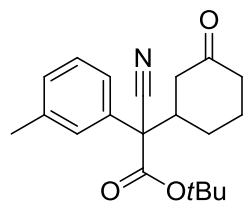

**rac-3fa**

According to GP2 *tert*-butyl-2-cyano-2-(*m*-tolyl)acetate **1f** (260.0 mg, 1.12 mmol, 1 equiv) was treated with 2-cyclohexen-1-one **2a** (108.1 mg, 1.12 mmol, 1 equiv). Column chromatography (petrol ether:EtOAc = 9:1 → 4:1) of the crude product yielded **rac-3fa** (189.4 mg, 0.58 mmol, 52%) as a colorless solid with a  $dr_{(R,R+S,S):(S,R+R,S)}$  of 38:62.

**C<sub>20</sub>H<sub>25</sub>NO<sub>3</sub>**, MW: 327.42 g mol<sup>-1</sup>. **Mp**: 87.4-87.7 °C. **HRMS (ESI) *m/z***: Calc. for [C<sub>20</sub>H<sub>25</sub>NO<sub>3</sub> + Na]<sup>+</sup>: 350.1727. Found: 350.1727. **Microanalysis**: Calc. for C<sub>20</sub>H<sub>25</sub>NO<sub>3</sub>: C: 73.37; H: 7.70; N: 4.28. Found: C: 73.31; H: 7.69; N: 4.22.

### ***tert*-Butyl-2-cyano-2-(4-fluorophenyl)-2-(3-oxocyclohexyl)-acetate (3ga)**

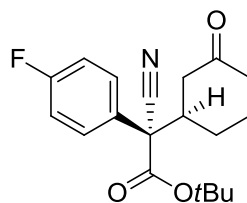

**(R,R)-3ga**

According to GP3 *tert*-butyl-2-cyano-2-(*m*-tolyl)acetate **1f** (39.4 mg, 0.17 mmol, 1 equiv) was treated with 2-cyclohexen-1-one **2a** (32.2 mg, 0.34 mmol, 2 equiv) in the presence of **FBIP-O<sub>2</sub>CC<sub>3</sub>F<sub>7</sub>** (1.38 mg, 0.84 μmol, 0.5 mol%) to yield **(R,R)-3ga** (54.6 mg, 0.16 mmol, 97%,  $ee_{(R,R)} = 92%$ ,  $ee_{(S,R)} = 65%$ ,  $dr_{(R,R+S,S):(S,R+R,S)} = 90:10$ ) as a colorless solid. The  $dr$  and  $ee$  values were determined by chiral column HPLC: Chiracel AD-H, *n*-hexane/*i*-PrOH (99:1), 1.2 mL min<sup>-1</sup>, detection at 210 nm,  $t_{(R,R)} = 27.4$  min,  $t_{(S,S)} = 34.4$  min. The major diastereomer was isolated by column chromatography (CH<sub>2</sub>Cl<sub>2</sub> + 1% Et<sub>2</sub>O).

**C<sub>19</sub>H<sub>22</sub>NO<sub>3</sub>F**, MW: 331.38 g mol<sup>-1</sup>. **Mp**: 143.9-144.2 °C.  $[\alpha]_D^{20}$ : +27.8 (*c* = 0.01, CH<sub>2</sub>Cl<sub>2</sub>). **<sup>1</sup>H NMR (300 MHz, CDCl<sub>3</sub>, 21 °C) of the (R,R)/(S,S)-diastereomer**:  $\delta = 7.53$  (*d*, *J* = 9.0, 1H, arom. *H*),  $\delta = 7.52$  (*d*, *J* = 9.0, 1H, arom. *H*),  $\delta = 7.11$  (*d*, *J* = 8.8, 1H, arom. *H*),  $\delta = 7.09$  (*d*, *J* = 8.8, 1H,

arom. *H*), 2.82-2.71 (*m*, 1H, CH<sub>2</sub>), 2.46-2.40 (*m*, 1H, CH<sub>2</sub>), 2.37-2.26 (*m*, 1H, CH<sub>2</sub>), 2.23-2.14 (*m*, 1H, CH<sub>2</sub>), 2.12-2.05 (*m*, 2H, CH<sub>2</sub>), 1.91-1.82 (*m*, 1H, CH<sub>2</sub>), 1.78-1.64 (*m*, 1H, CH<sub>2</sub>), 1.44 (*s*, 9H, CH<sub>3</sub>). <sup>13</sup>C NMR (75 MHz, CDCl<sub>3</sub>, 21 °C) of the (*R,R*)/(*S,S*)-diastereomer: δ = 208.7, 165.5, 163.0 (*d*, *J* = 251.9, CF), 128.11 (*m*, CCCCf), 128.10 (*d*, *J* = 8.3, CCCCf), 116.7, 116.3 (*d*, *J* = 22.2, CCF), 85.2, 59.8, 45.1, 42.5, 40.9, 28.2, 27.6, 24.3. <sup>19</sup>F NMR (235 MHz, CDCl<sub>3</sub>, 21 °C) of the (*R,R*)/(*S,S*)-diastereomer: δ = -112.23 (*m*, 1F). IR (solid) of the (*R,R*)/(*S,S*)-diastereomer: ν = 2959, 2940, 2873, 2248, 1727, 1714, 1604, 1506, 1412, 1369, 1256, 1228, 1149, 1014.

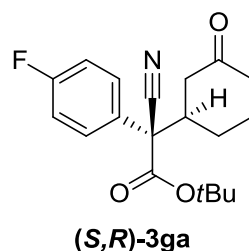

According to GP3 *tert*-butyl-2-cyano-2-(*m*-tolyl)acetate **1f** (20.4 mg, 87 μmol, 1 equiv) was treated with 2-cyclohexen-1-one **2a** (16.7 mg, 0.17 mmol, 2 equiv) in the presence of **FIP-O<sub>2</sub>CC<sub>3</sub>F<sub>7</sub>** (1.13 mg, 0.87 μmol, 1 mol%) to yield (*S,R*)-**3ga** (26.5 mg, 80 μmol, 92%, *ee*<sub>(*S,R*)</sub> = 90%, *ee*<sub>(*R,R*)</sub> = 7%, *dr*<sub>(*S,R+R,S*):(*R,R+S,S*)</sub> = 77:23) as a colorless solid. The *dr* and *ee* values were determined by chiral column HPLC: Chiracel AD-H, *n*-hexane/*i*-PrOH (99:1), 1.2 mL min<sup>-1</sup>, detection at 210 nm, *t*<sub>(*S,R*)</sub> = 14.4 min, *t*<sub>(*R,S*)</sub> = 13.2 min. The major diastereomer was isolated by column chromatography (CH<sub>2</sub>Cl<sub>2</sub> + 1% Et<sub>2</sub>O).

**C<sub>19</sub>H<sub>22</sub>NO<sub>3</sub>F**, MW: 331.38 g mol<sup>-1</sup>. **Mp**: 115.3-115.8 °C. [ $\alpha$ ]<sub>D</sub><sup>20</sup>: +11.0 (*c* = 0.23, CH<sub>2</sub>Cl<sub>2</sub>). <sup>1</sup>H NMR (300 MHz, CDCl<sub>3</sub>, 21 °C) of the (*S,R*)/(*R,S*)-diastereomer: δ = 7.59 (*d*, *J* = 9.0, 1H, arom. *H*), δ = 7.57 (*d*, *J* = 9.0, 1H, arom. *H*), 7.13 (*d*, *J* = 8.8, 1H, arom. *H*), 7.11 (*d*, *J* = 8.8, 1H, arom. *H*), 2.83-2.71 (*m*, 1H, CH<sub>2</sub>), 2.64-2.47 (*m*, 2H, CH<sub>2</sub>), 2.46-2.25 (*m*, 2H, CH<sub>2</sub>), 2.16-1.99 (*m*, 1H, CH<sub>2</sub>), 1.64-1.46 (*m*, 2H, CH<sub>2</sub>), 1.43 (*s*, 9H, CH<sub>3</sub>). <sup>13</sup>C NMR (75 MHz, CDCl<sub>3</sub>, 21 °C) of the (*S,R*)/(*R,S*)-diastereomer: δ = 208.4, 165.1, 162.9 (*d*, *J* = 251.9, CF), 128.8 (*d*, *J* = 3.3, CCCCf), 128.2 (*d*, *J* = 8.6, CCCCf), 116.7, 116.2 (*d*, *J* = 21.8, CCF), 85.3, 59.9, 45.4, 44.5, 40.8, 30.9, 27.6, 25.7, 24.0. <sup>19</sup>F NMR (235 MHz, CDCl<sub>3</sub>, 21 °C) of the (*S,R*)/(*R,S*)-diastereomer: δ = -112.35 (*m*, 1F). IR (solid) of the (*S,R*)/(*R,S*)-diastereomer: ν = 2974, 2932, 2880, 2245, 1728, 1715, 1606, 1508, 1413, 1369, 1256, 1239, 1228, 1149, 1014.



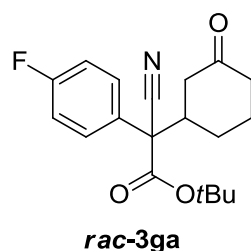

According to GP2 *tert*-butyl-2-cyano-2-(4-fluorophenyl)acetate **1g** (252.0 mg, 1.07 mmol, 1 equiv) was treated with 2-cyclohexen-1-one **2a** (103.0 mg, 1.07 mmol, 1 equiv). Column chromatography (petrol ether:EtOAc = 9:1 → 4:1) of the crude product yielded **rac-3ga** (222.8 mg, 0.67 mmol, 63%) as a colorless solid with a  $dr_{(R,R+S,S):(S,R+R,S)}$  of 37:63.

**C<sub>19</sub>H<sub>22</sub>NO<sub>3</sub>F**, MW: 331.38 g mol<sup>-1</sup>. Mp: 125.8-126.4 °C. HRMS (ESI) *m/z*: Calc. for [C<sub>19</sub>H<sub>22</sub>NO<sub>3</sub>F + Na]<sup>+</sup>: 354.1476. Found: 354.1476. Microanalysis: Calc. for C<sub>19</sub>H<sub>22</sub>NO<sub>3</sub>F: C: 68.86; H: 6.69; N: 4.23. Found: C: 68.61; H: 6.62; N: 4.16.

### ***tert*-Butyl-2-cyano-2-(4-chlorophenyl)-2-(3-oxocyclohexyl)-acetate (3ha)**

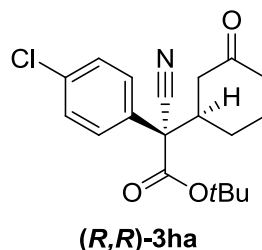

According to GP3 *tert*-butyl-2-cyano-2-(4-chlorophenyl)acetate **1h** (40.6 mg, 0.16 mmol, 1 equiv) was treated with 2-cyclohexen-1-one **2a** (31.0 mg, 0.32 mmol, 2 equiv) in the presence of **FBIP-O<sub>2</sub>CC<sub>3</sub>F<sub>7</sub>** (1.33 mg, 0.81 mmol, 0.5 mol%) to yield **(R,R)-3ha** (55.1 mg, 0.16 mmol, 99%,  $ee_{(R,R)} = 99%$ ,  $ee_{(S,R)} = 64%$ ,  $dr_{(R,R+S,S):(S,R+R,S)} = 88:12$ ) as a colorless solid. The  $dr$  value was determined by <sup>1</sup>H NMR. The  $ee$  values were determined by chiral column HPLC: Chiracel AD-H, *n*-hexane/*i*-PrOH (99.5:0.5), 2 mL min<sup>-1</sup>, detection at 210 nm,  $t_{(R,R)} = 21.7$  min,  $t_{(S,S)} = 26.2$  min. The major diastereomer was isolated by column chromatography (CH<sub>2</sub>Cl<sub>2</sub> + 1% Et<sub>2</sub>O).

Constitution and relative configuration of **3ha** was confirmed by X-ray crystal structure analysis. The (*S,S*)/(*R,R*)-configured diastereomer **3ha** crystallized preferentially in racemic form (from a sample with  $ee_{(R,R)} = 99%$ ) in *n*-hexane/*i*PrOH at room temperature. CCDC 856194 contains the

supplementary crystallographic data for this compound. These data can be obtained free of charge from the Cambridge Crystallographic Data Centre via [www.ccdc.cam.ac.uk/data\\_request/cif](http://www.ccdc.cam.ac.uk/data_request/cif).

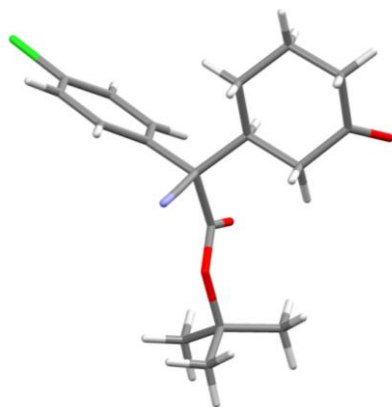

X-ray crystal structure of **3ha** [color code: C (grey); Cl (green); N (blue); O (red); H (white)].

**C<sub>19</sub>H<sub>22</sub>NO<sub>3</sub>Cl**, MW: 347.84 g mol<sup>-1</sup>. **Mp**: 148.1-148.6 °C. [ $\alpha$ ]<sub>D</sub><sup>20</sup>: +36.6 (c = 0.01, CH<sub>2</sub>Cl<sub>2</sub>). **<sup>1</sup>H NMR (500 MHz, CDCl<sub>3</sub>, 21 °C) of the (R,R)/(S,S)-diastereomer**:  $\delta$  = 7.48 (*d*, *J* = 8.4, 2H, *m-H*), 7.38 (*d*, *J* = 8.9, 2H, *o-H*), 2.78-2.72 (*m*, 1H, CH), 2.44-2.41 (*m*, 1H, CH<sub>2</sub>), 2.34-2.28 (*m*, 1H, CH<sub>2</sub>), 2.23-2.17 (*m*, 1H, CH<sub>2</sub>), 2.14-2.06 (*m*, 2H, CH<sub>2</sub>), 1.87-1.80 (*m*, 2H, CH<sub>2</sub>), 1.72 (*qt*, *J* = 13.2, 3.7, 1H, CH<sub>2</sub>), 1.44 (*s*, 9H, CH<sub>3</sub>). **<sup>13</sup>C NMR (125 MHz, CDCl<sub>3</sub>, 21 °C) of the (R,R)/(S,S)-diastereomer**:  $\delta$  = 208.6, 165.3, 135.4, 130.9, 129.5, 127.5, 116.5, 85.3, 60.0, 45.1, 42.5, 40.9, 28.2, 27.6, 24.3. **IR (solid) of the (R,R)/(S,S)-diastereomer**:  $\nu$  = 2937, 2869, 2242, 1735, 1708, 1493, 1454, 1403, 1370, 1252, 1230, 1150, 1095, 1013.

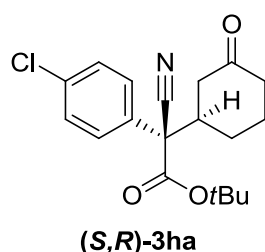

According to GP3 *tert*-butyl-2-cyano-2-(4-chlorophenyl)acetate **1h** (10.2 mg, 41  $\mu$ mol, 1 equiv) was treated with 2-cyclohexen-1-one **2a** (7.79 mg, 81  $\mu$ mol, 2 equiv) in the presence of **FIP-O<sub>2</sub>CC<sub>3</sub>F<sub>7</sub>** (0.53 mg, 0.41  $\mu$ mol, 1 mol%) to yield **(S,R)-3ha** (14.1 mg, 41  $\mu$ mol, 99%, *ee*<sub>(S,R)</sub> = 83%, *ee*<sub>(R,R)</sub> = 55%, *dr*<sub>(S,R+S):(R,R+S,S)</sub> = 84:16) as a colorless oil. The *dr* value was determined by <sup>1</sup>H NMR. The *ee* values were determined by chiral column HPLC: Chiralcel AD-H, *n*-hexane/*i*-PrOH (99.5:0.5), 2 mL min<sup>-1</sup>, detection at 210 nm, *t*<sub>(S,R)</sub> = 15.3 min, *t*<sub>(R,S)</sub> = 12.6 min. The major diastereomer was isolated by column chromatography (CH<sub>2</sub>Cl<sub>2</sub> + 1% Et<sub>2</sub>O).

$C_{19}H_{22}NO_3Cl$ , MW: 347.84 g mol<sup>-1</sup>.  $[\alpha]_D^{20}$ : +8.8 (c = 0.06, CH<sub>2</sub>Cl<sub>2</sub>). <sup>1</sup>H NMR (500 MHz, CDCl<sub>3</sub>, 21 °C) of the (*S,R*)/(*R,S*)-diastereomer:  $\delta$  = 7.54 (d, *J* = 8.7, 2H, *m-H*), 7.41 (d, *J* = 8.3, 2H, *o-H*), 2.78-2.73 (m, 1H, CH), 2.61-2.58 (m, 1H, CH<sub>2</sub>), 2.54-2.49 (m, 1H, CH<sub>2</sub>), 2.44-2.41 (m, 1H, CH<sub>2</sub>), 2.34-2.27 (m, 1H, CH<sub>2</sub>), 2.04-2.01 (m, 1H, CH<sub>2</sub>), 1.52-1.46 (m, 3H, CH<sub>2</sub>), 1.43 (s, 9H, CH<sub>3</sub>). <sup>13</sup>C NMR (125 MHz, CDCl<sub>3</sub>, 21 °C) of the (*S,R*)/(*R,S*)-diastereomer:  $\delta$  = 208.3, 164.9, 135.3, 129.4, 127.7, 85.5, 60.1, 45.3, 44.5, 40.7, 27.6, 25.8, 24.0. IR (solid) of the (*S,R*)/(*R,S*)-diastereomer:  $\nu$  = 2965, 2223, 1731, 1715, 1494, 1410, 1370, 1257, 1232, 1148, 1095, 1016.

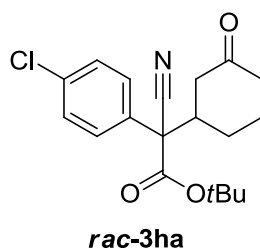

According to GP2 *tert*-butyl-2-cyano-2-(4-chlorophenyl)acetate **1h** (258.5 mg, 1.03 mmol, 1 equiv) was treated with 2-cyclohexen-1-one **2a** (98.7 mg, 1.03 mmol, 1 equiv). Column chromatography (petrol ether:EtOAc = 9:1 → 4:1) of the crude product yielded **rac-3ha** (320.3 mg, 0.93 mmol, 90%) as a colorless solid with a  $dr_{(R,R+S,S):(S,R+R,S)}$  of 42:58.

$C_{19}H_{22}NO_3Cl$ , MW: 347.84 g mol<sup>-1</sup>. Mp: 140.5-141.1 °C. HRMS (ESI) *m/z*: Calc. for [C<sub>19</sub>H<sub>22</sub>NO<sub>3</sub>Cl + Na]<sup>+</sup>: 370.1180. Found: 370.1175. Microanalysis: Calc. for C<sub>19</sub>H<sub>22</sub>NO<sub>3</sub>Cl: C: 65.61; H: 6.38; N: 4.03. Found: C: 65.27; H: 6.33; N: 3.97.

### ***tert*-Butyl-2-cyano-2-(4-bromophenyl)-2-(3-oxocyclohexyl)-acetate (3ia)**

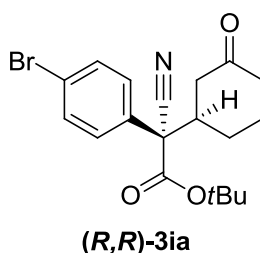

According to GP3 *tert*-butyl-2-cyano-2-(4-bromophenyl)acetate **1i** (40.7 mg, 0.14 mmol, 1 equiv) was treated with 2-cyclohexen-1-one **2a** (26.4 mg, 0.27 mmol, 2 equiv) in the presence

of **FBIP-O<sub>2</sub>CC<sub>3</sub>F<sub>7</sub>** (1.14 mg, 0.69  $\mu$ mol, 0.5 mol%) to yield **(R,R)-3ia** (53.8 mg, 0.14 mmol, 98%,  $ee_{(R,R)} = 97%$ ,  $ee_{(S,R)} = 62%$ ,  $dr_{(R,R+S,S):(S,R+R,S)} = 86:14$ ) as a colorless solid. The  $dr$  and  $ee$  values were determined by chiral column HPLC: Chiracel AD-H, *n*-hexane/*i*-PrOH (99.5/0.5), 1.2 mL min<sup>-1</sup>, detection at 210 nm,  $t_{(R,R)} = 51.3$  min,  $t_{(S,S)} = 56.9$  min. The major diastereomer was isolated by column chromatography (CH<sub>2</sub>Cl<sub>2</sub> + 1% Et<sub>2</sub>O).

Constitution and relative configuration of **3ia** was confirmed by X-ray crystal structure analysis. The (*S,S*)/(*R,R*)-configured diastereomer **3ia** crystallized preferentially in racemic form (from a sample with  $ee_{(R,R)} = 90%$ ) in diethylether at room temperature. CCDC 856190 contains the supplementary crystallographic data for this compound. These data can be obtained free of charge from the Cambridge Crystallographic Data Centre via [www.ccdc.cam.ac.uk/data\\_request/cif](http://www.ccdc.cam.ac.uk/data_request/cif).

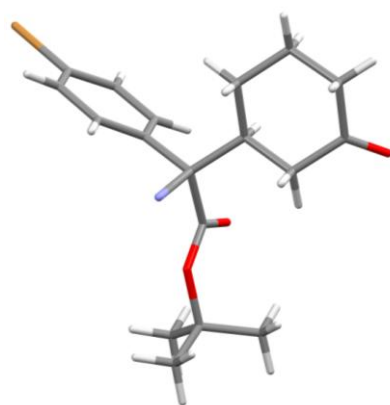

X-ray crystal structure of **3ia** [color code: C (grey); Br (brown); N (blue); O (red); H (white)]. One included diethylether molecule per unit cell is omitted for clarity.

**C<sub>19</sub>H<sub>22</sub>NO<sub>3</sub>Br**, MW: 392.29 g mol<sup>-1</sup>. **Mp**: 155.6-156.2 °C. [ $\alpha$ ]<sub>D</sub><sup>20</sup>: +29.5 (c = 0.01, CH<sub>2</sub>Cl<sub>2</sub>). **<sup>1</sup>H NMR (500 MHz, CDCl<sub>3</sub>, 21 °C) of the (R,R)/(S,S)-diastereomer**:  $\delta = 7.54$  (*d*,  $J = 7.9$ , 2H, *m-H*), 7.41(*d*,  $J = 8.5$ , 2H, *o-H*), 2.78-2.72 (*m*, 1H, *CH*), 2.44-2.41 (*m*, 1H, *CH*<sub>2</sub>), 2.35-2.28 (*m*, 1H, *CH*<sub>2</sub>), 2.20-2.17 (*m*, 1H, *CH*<sub>2</sub>), 2.14-2.06 (*m*, 2H, *CH*<sub>2</sub>), 1.87-1.80 (*m*, 2H, *CH*<sub>2</sub>), 1.72 (*qt*,  $J = 13.4$ , 3.8, 1H, *CH*<sub>2</sub>), 1.44 (*s*, 9H, *CH*<sub>3</sub>). **<sup>13</sup>C NMR (125 MHz, CDCl<sub>3</sub>, 21 °C) of the (R,R)/(S,S)-diastereomer**:  $\delta = 208.6$ , 165.3, 132.5, 131.4, 127.8, 123.5, 116.4, 85.4, 60.0, 42.0, 42.5, 40.9, 28.1, 27.6, 24.3. **IR (solid) of the (R,R)/(S,S)-diastereomer**:  $\nu = 2937$ , 2868, 2244, 1733, 1710, 1489, 1451, 1397, 1370, 1252, 1229, 1149, 1078, 1009.

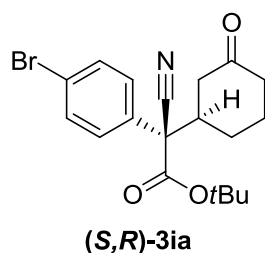

According to GP3 *tert*-butyl-2-cyano-2-(4-bromophenyl)acetate **1i** (9.86 mg, 33  $\mu$ mol, 1 equiv) was treated with 2-cyclohexen-1-one **2a** (6.40 mg, 67  $\mu$ mol, 2 equiv) in the presence of **FIP-O<sub>2</sub>CC<sub>3</sub>F<sub>7</sub>** (0.22 mg, 0.17  $\mu$ mol, 0.5 mol%) to yield **(S,R)-3ia** (12.8 mg, 33  $\mu$ mol, 99%,  $ee_{(S,R)} = 87%$ ,  $ee_{(R,R)} = 23%$ ,  $dr_{(S,R+R,S):(R,R+S,S)} = 63:37$ ) as a colorless oil. The  $dr$  and  $ee$  values were determined by chiral column HPLC: Chiracel AD-H, *n*-hexane/*i*-PrOH (99.5/0.5), 1.2 mL min<sup>-1</sup>, detection at 210 nm,  $t_{(S,R)} = 36.8$  min,  $t_{(R,S)} = 27.8$  min. The major diastereomer was isolated by column chromatography (CH<sub>2</sub>Cl<sub>2</sub> + 1% Et<sub>2</sub>O).

**C<sub>19</sub>H<sub>22</sub>NO<sub>3</sub>Br**, MW: 392.29 g mol<sup>-1</sup>. [ $\alpha$ ]<sub>D</sub><sup>20</sup>: -2.4 (c = 0.21, CH<sub>2</sub>Cl<sub>2</sub>). **<sup>1</sup>H NMR (500 MHz, CDCl<sub>3</sub>, 21 °C) of the (S,R)/(S,S)-diastereomer:**  $\delta = 7.56$  (d,  $J = 8.7$ , 2H, *m*-H), 7.47 (d,  $J = 8.7$ , 2H, *o*-H), 2.78-2.72 (*m*, 1H, CH), 2.61-2.58 (*m*, 1H, CH<sub>2</sub>), 2.55-2.49 (*m*, 1H, CH<sub>2</sub>), 2.44-2.41 (*m*, 1H, CH<sub>2</sub>), 2.35-2.27 (*m*, 1H, CH<sub>2</sub>), 2.21-2.08 (*m*, 1H, CH<sub>2</sub>), 2.05-2.01 (*m*, 1H, CH<sub>2</sub>), 1.90-1.68 (*m*, 1H, CH<sub>2</sub>), 1.52-1.46 (*m*, 1H, CH<sub>2</sub>), 1.43 (*s*, 9H, CH<sub>3</sub>). **<sup>13</sup>C NMR (125 MHz, CDCl<sub>3</sub>, 21 °C) of the (S,R)/(S,S)-diastereomer:**  $\delta = 208.3$ , 164.8, 132.5, 132.4, 129.3, 128.0, 116.5, 85.5, 60.2, 45.3, 44.5, 40.7, 27.6, 25.8, 24.0. **IR (solid) of the (S,R)/(R,S)-diastereomer:**  $\nu = 3074$ , 3004, 2968, 2928, 2867, 2244, 1728, 1715, 1491, 1450, 1405, 1370, 1255, 1232, 1149, 1076, 1012.

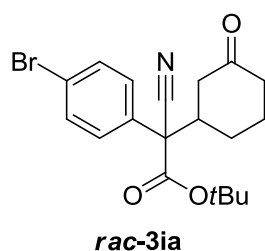

According to GP2 *tert*-butyl-2-cyano-2-(4-bromophenyl)acetate **1i** (255.1 mg, 0.86 mmol, 1 equiv) was treated with 2-cyclohexen-1-one **2a** (82.8 mg, 0.86 mmol, 1 equiv). Column chromatography (petrol ether:EtOAc = 9:1  $\rightarrow$  4:1) of the crude product yielded **rac-3ia** (283.3 mg, 0.72 mmol, 84%) as a colorless oil with a  $dr_{(R,R+S,S):(S,R+R,S)}$  of 40:60.

**C<sub>19</sub>H<sub>22</sub>NO<sub>3</sub>Br**, MW: 392.29 g mol<sup>-1</sup>. **Mp**: 143.0-143.4 °C. **HRMS (ESI) *m/z***: Calc. for [C<sub>13</sub>H<sub>14</sub>BrNO<sub>2</sub>]<sup>-</sup>: 264.0130. Found: 294.0129. **Microanalysis**: Calc. for C<sub>19</sub>H<sub>22</sub>NO<sub>3</sub>Br: C: 58.17; H: 5.65; N: 3.57. Found: C: 58.44; H: 5.65; N: 3.57.

### ***tert*-Butyl-2-cyano-2-(3-oxocyclohexyl)-2-(*p*-tolyl)-acetate (**3ja**)**

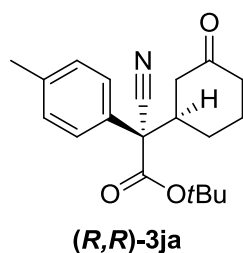

According to GP3 *tert*-butyl-2-cyano-2-(*p*-tolyl)acetate **1j** (41.0 mg, 0.18 mmol, 1 equiv) was treated with 2-cyclohexen-1-one **2a** (34.1 mg, 0.35 mmol, 2 equiv) in the presence of **FBIP-O<sub>2</sub>CC<sub>3</sub>F<sub>7</sub>** (2.93 mg, 1.8 μmol, 1 mol%) to yield **(*R,R*)-3ja** (44.2 mg, 0.14 mmol, 75%, *ee*<sub>(*R,R*)</sub> = 94%, *ee*<sub>(*S,R*)</sub> = 76%, *dr*<sub>(*R,R+S,S*):(*S,R+R,S*)</sub> = 92:08) as a colorless solid. The *dr* and *ee* values were determined by chiral column HPLC: Chiracel AS-H, *n*-hexane/*i*-PrOH (99:1), 1.5 mL min<sup>-1</sup>, detection at 210 nm, *t*<sub>(*R,R*)</sub> = 10.8 min, *t*<sub>(*S,S*)</sub> = 43.2 min. The major diastereomer was isolated by column chromatography (CH<sub>2</sub>Cl<sub>2</sub> + 1% Et<sub>2</sub>O).

**C<sub>20</sub>H<sub>25</sub>NO<sub>3</sub>**, MW: 327.42 g mol<sup>-1</sup>. **Mp**: 114.4-115.4 °C. **[α]<sub>D</sub><sup>20</sup>**: +35.3 (c = 0.01, CH<sub>2</sub>Cl<sub>2</sub>). **<sup>1</sup>H NMR (300 MHz, CDCl<sub>3</sub>, 21 °C) of the (*R,R*)/(*S,S*)-diastereomer**: δ = 7.39 (*d*, *J* = 8.3, 2H, arom. *H*), 7.19 (*d*, *J* = 8.0, 2H, arom. *H*), 2.82-2.72 (*m*, 1H, *CH*), 2.44-2.38 (*m*, 1H, *CH*<sub>2</sub>), 2.35 (*s*, 3H, *CH*<sub>3</sub>), 2.32-2.25 (*m*, 1H, *CH*<sub>2</sub>), 2.21-2.15 (*m*, 1H, *CH*<sub>2</sub>), 2.10-2.06 (*m*, 2H, *CH*<sub>2</sub>), 1.93-1.64 (*m*, 3H, *CH*<sub>2</sub>), 1.43 (*s*, 9H, *CH*<sub>3</sub>). **<sup>13</sup>C NMR (75 MHz, CDCl<sub>3</sub>, 21 °C) of the (*R,R*)/(*S,S*)-diastereomer**: δ = 209.2, 165.8, 139.1, 130.0, 129.3, 125.9, 117.0, 84.7, 60.1, 44.9, 42.6, 41.0, 28.2, 27.6, 24.3, 21.0. **IR (solid) of the (*R,R*)/(*S,S*)-diastereomer**: ν = 2958, 2924, 2863, 2248, 1718, 1511, 1447, 1369, 1316, 1258, 1227, 1148, 1059, 1043.

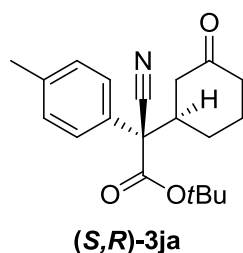

According to GP3 *tert*-butyl-2-cyano-2-(*p*-tolyl)acetate **1j** (20.3 mg, 88  $\mu$ mol, 1 equiv) was treated with 2-cyclohexen-1-one **2a** (16.9 mg, 0.18 mmol) in the presence of **FIP-O<sub>2</sub>CC<sub>3</sub>F<sub>7</sub>** (0.57 mg, 0.44  $\mu$ mol, 0.5 mol%) to yield **(S,R)-3ja** (26.5 mg, 81  $\mu$ mol, 92%,  $ee_{(S,R)} = 99%$ ,  $ee_{(R,R)} = 32%$ ,  $dr_{(S,R+R,S):(R,R+S,S)} = 76:24$ ) as a colorless solid. The  $dr$  and  $ee$  values were determined by chiral column HPLC: Chiracel AS-H, *n*-hexane/*i*-PrOH (99:1), 1.5 mL min<sup>-1</sup>, detection at 210 nm,  $t_{(S,R)} = 20.0$  min,  $t_{(R,S)} = 17.2$  min. The major diastereomer was isolated by column chromatography (CH<sub>2</sub>Cl<sub>2</sub> + 1% Et<sub>2</sub>O).

**C<sub>20</sub>H<sub>25</sub>NO<sub>3</sub>**, MW: 327.42 g mol<sup>-1</sup>. **Mp**: 131.9-132.8 °C. **[ $\alpha$ ]<sub>D</sub><sup>20</sup>**: +9.7 (c = 0.20, CH<sub>2</sub>Cl<sub>2</sub>). **<sup>1</sup>H NMR (300 MHz, CDCl<sub>3</sub>, 21 °C) of the (S,R)/(R,S)-diastereomer**:  $\delta = 7.46$  (*d*,  $J = 8.3$ , 2H, arom. *H*), 7.22 (*d*,  $J = 8.2$ , 2H, arom. *H*), 2.82-2.72 (*m*, 1H, CH), 2.64-2.48 (*m*, 2H, CH<sub>2</sub>), 2.44-2.39 (*m*, 1H, CH<sub>2</sub>), 2.37 (*s*, 3H, CH<sub>3</sub>), 2.33-2.24 (*m*, 1H, CH<sub>2</sub>), 2.05-1.97 (*m*, 1H, CH<sub>2</sub>), 1.55-1.45 (*m*, 3H, CH<sub>2</sub>), 1.42 (*s*, 9H, CH<sub>3</sub>). **<sup>13</sup>C NMR (75 MHz, CDCl<sub>3</sub>, 21 °C) of the (S,R)/(R,S)-diastereomer**:  $\delta = 208.8, 165.3, 139.0, 130.0, 129.9, 126.1, 117.0, 84.9, 60.3, 45.2, 44.6, 40.8, 27.6, 25.8, 24.0, 21.0$ . **IR (solid) of the (S,R)/(R,S)-diastereomer**:  $\nu = 2970, 2928, 2870, 2243, 1729, 1714, 1514, 1451, 1371, 1253, 1231, 1149, 1017$ .

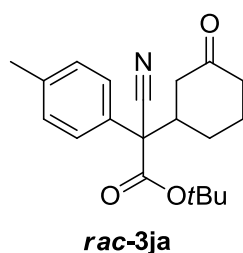

According to GP2 *tert*-butyl-2-cyano-2-(*p*-tolyl)acetate **1j** (260.0 mg, 1.12 mmol, 1 equiv) was treated with 2-cyclohexen-1-one **2a** (108.1 mg, 1.12 mmol, 1 equiv). Column chromatography (petrol ether:EtOAc = 9:1  $\rightarrow$  4:1) of the crude product yielded **rac-3ja** (162.6 mg, 0.50 mmol, 44%) as a colorless solid with a  $dr_{(R,R+S,S):(S,R+R,S)}$  of 38:62.

$C_{20}H_{25}NO_3$ , MW: 327.42 g mol<sup>-1</sup>. Mp: 102.0-102.6 °C. HRMS (ESI) *m/z*: Calc. for [C<sub>20</sub>H<sub>25</sub>NO<sub>3</sub> + Na]<sup>+</sup>: 350.1727. Found: 350.1727. Microanalysis: Calc. for C<sub>20</sub>H<sub>25</sub>NO<sub>3</sub>: C: 73.37; H: 7.70; N: 4.28. Found: C: 73.21; H: 7.61; N: 4.24.

### ***tert*-Butyl-2-cyano-2-(2-fluorophenyl)-2-(3-oxocyclohexyl)-acetate (3ka)**

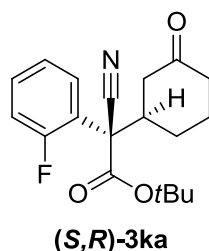

According to GP3 *tert*-butyl-2-cyano-2-(2-fluorophenyl)acetate **1k** (9.93 mg, 42 μmol, 1 equiv) was treated with 2-cyclohexen-1-one **2a** (8.12 mg, 84 μmol, 2 equiv) in the presence of **FIP-O<sub>2</sub>CC<sub>3</sub>F<sub>7</sub>** (0.55 mg, 0.42 μmol, 1 mol%) to yield **(S,R)-3ka** (6.12 mg, 18.5 μmol, 44%, *ee*<sub>(S,R)</sub> = 81%, *ee*<sub>(R,R)</sub> = 50%, *dr*<sub>(S,R+S):(R,R+S,S)</sub> = 57:43) as a colorless solid. The *dr* value was determined by <sup>1</sup>H NMR. The major diastereomer was isolated by column chromatography (CH<sub>2</sub>Cl<sub>2</sub> + 1% Et<sub>2</sub>O). The *ee* value of the major diastereomer was determined by chiral column HPLC: Chiracel AS-H, *n*-hexane/*i*-PrOH (97:3), 1 mL min<sup>-1</sup>, detection at 210 nm, *t*<sub>(S,R)</sub> = 20.8 min, *t*<sub>(R,S)</sub> = 28.2 min.

$C_{19}H_{22}NO_3F$ , MW: 331.38 g mol<sup>-1</sup>. Mp: 72.9-73.3 °C. [ $\alpha$ ]<sub>D</sub><sup>20</sup>: +8.3 (c = 0.10, CH<sub>2</sub>Cl<sub>2</sub>). <sup>1</sup>H NMR (300 MHz, CDCl<sub>3</sub>, 21 °C) of the **(S,R)/(R,S)**-diastereomer:  $\delta$  = 7.56 (*td*, *J* = 7.9, 1.6, 1H, arom. *H*), 7.44-7.37 (*m*, 1H, arom. *H*), 7.22 (*td*, *J* = 7.6, 1.1, 1H, arom. *H*), 7.16-7.07 (*m*, 1H, arom. *H*), 3.09-2.96 (*m*, 1H, CH), 2.75-2.68 (*m*, 1H, CH<sub>2</sub>), 2.56-2.51 (*m*, 1H, CH<sub>2</sub>), 2.47-2.40 (*m*, 1H, CH<sub>2</sub>), 2.34-2.21 (*m*, 1H, CH<sub>2</sub>), 2.10-2.04 (*m*, 1H, CH<sub>2</sub>), 1.78-1.49 (*m*, 3H, CH<sub>2</sub>), 1.43 (*s*, 9H, CH<sub>3</sub>). <sup>13</sup>C NMR (63 MHz, CDCl<sub>3</sub>, 21 °C) of the **(S,R)/(R,S)**-diastereomer:  $\delta$  = 208.7, 164.0, 159.0 (*d*, *J* = 251.7, CF), 131.0 (*d*, *J* = 8.7, CCCF), 129.6 (*d*, *J* = 2.5, CCCCCF), 124.8 (*d*, *J* = 3.3, CCCCFF), 120.7 (*d*, *J* = 11.9, CCF), 116.9 (*d*, *J* = 22.8, CCF), 116.5, 85.1, 57.3, 44.3, 42.2, 40.8, 31.0, 27.5, 26.8, 24.1. <sup>19</sup>F NMR (235 MHz, CDCl<sub>3</sub>, 21 °C) of the **(S,R)/(R,S)**-diastereomer [**(R,R)/(S,S)**-diastereomer]:  $\delta$  = -110.41 (*m*, 1F), [-110.91 (*m*, 1F)]. IR (solid) of the **(S,R)/(R,S)**-diastereomer:  $\nu$  = 2971, 2942, 2872, 2246, 1730, 1706, 1613, 1492, 1456, 1371, 1327, 1258, 1233, 1202, 1153, 1076.



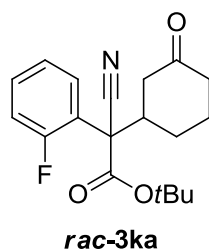

According to GP2 *tert*-butyl-2-cyano-2-(2-fluorophenyl)acetate **1k** (151.6 mg, 0.70 mmol, 1 equiv) was treated with 2-cyclohexen-1-one **2a** (67.1 mg, 0.70 mmol, 1 equiv). Column chromatography (petrol ether:EtOAc = 9:1 → 4:1) of the crude product yielded colorless, oily **rac-3ka** (106.9 mg, 0.32 mmol, 46%) as a colorless oil with a  $dr_{(R,R+S,S):(S,R+R,S)}$  of 36:64. The diastereomers were separated by column chromatography (CH<sub>2</sub>Cl<sub>2</sub> + 1% Et<sub>2</sub>O).

**C<sub>19</sub>H<sub>22</sub>NO<sub>3</sub>F**, MW: 331.38 g mol<sup>-1</sup>. <sup>1</sup>H NMR (300 MHz, CDCl<sub>3</sub>, 21 °C) of the (*R,R*)/(*S,S*)-diastereomer:  $\delta$  = 7.57 (*td*,  $J$  = 7.8, 1.6, 1H, arom. *H*), 7.43-7.35 (*m*, 1H, arom. *H*), 7.25-7.19 (*m*, 1H, arom. *H*), 7.14-7.07 (*m*, 1H, arom. *H*), 3.07-2.96 (*m*, 1H, *CH*), 2.46-2.41 (*m*, 1H, *CH*<sub>2</sub>), 2.35-2.27 (*m*, 2H, *CH*<sub>2</sub>), 2.21-2.15 (*m*, 2H, *CH*<sub>2</sub>), 2.10-2.04 (*m*, 1H, *CH*<sub>2</sub>), 1.87-1.56 (*m*, 2H, *CH*<sub>2</sub>), 1.43 (*s*, 9H, *CH*<sub>3</sub>). <sup>13</sup>C NMR (75 MHz, CDCl<sub>3</sub>, 21 °C) of the (*R,R*)/(*S,S*)-diastereomer:  $\delta$  = 208.9, 164.1, 159.6 (*d*,  $J$  = 251.7, *CF*), 131.6 (*d*,  $J$  = 8.7, *CCCF*), 129.5 (*d*,  $J$  = 2.5, *CCCCF*), 124.9 (*d*,  $J$  = 3.3, *CCCF*), 120.6 (*d*,  $J$  = 11.9, *CCF*), 116.9 (*d*,  $J$  = 22.8, *CCF*), 116.5, 85.0, 57.3, 57.2, 43.4, 41.8, 41.7, 41.0, 28.2, 27.5, 24.2. <sup>19</sup>F NMR (235 MHz, CDCl<sub>3</sub>, 21 °C) of the (*R,R*)/(*S,S*)-diastereomer:  $\delta$  = -110.91 (*m*, 1F). IR (solid) of the (*R,R*)/(*S,S*)-diastereomer:  $\nu$  = 2968, 2953, 2883, 2239, 1744, 1708, 1490, 1450, 1370, 1244, 1228, 1148, 1103, 1066, 1000. MS (ESI)  $m/z$ : 354.15 ([*M*+*Na*]<sup>+</sup>, 100%). HRMS (ESI)  $m/z$ : Calc. for [*M*+*Na*]<sup>+</sup>: 354.1476. Found: 354.1489.

### ***tert*-Butyl-2-cyano-2-(3-fluorophenyl)-2-(3-oxocyclohexyl)-acetate (3la)**

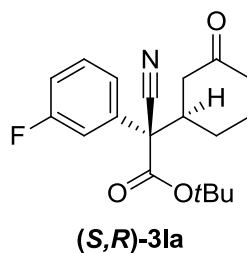

According to GP3 *tert*-butyl-2-cyano-2-(3-fluorophenyl)acetate **1l** (10.1 mg, 43  $\mu$ mol, 1 equiv) was treated with 2-cyclohexen-1-one **2a** (8.23 mg, 86  $\mu$ mol, 2 equiv) in the presence of **FIP-**

$\text{O}_2\text{CC}_3\text{F}_7$  (0.56 mg, 0.43  $\mu\text{mol}$ , 1 mol%) to yield (*S,R*)-**3la** (14.1 mg, 43  $\mu\text{mol}$ , 99,  $ee_{(S,R)} = 85\%$ ,  $ee_{(R,R)} = 18\%$ ,  $dr_{(S,R+R,S):(R,R+S,S)} = 69:31$ ) as a colorless solid. The  $dr$  and  $ee$  values were determined by chiral column HPLC: Chiracel AS-H, *n*-hexane/*i*-PrOH (97:3), 1 mL  $\text{min}^{-1}$ , detection at 210 nm,  $t_{(S,R)} = 13.7$  min,  $t_{(R,S)} = 15.6$  min. The major diastereomer was isolated by column chromatography ( $\text{CH}_2\text{Cl}_2 + 1\% \text{Et}_2\text{O}$ ).

$\text{C}_{19}\text{H}_{22}\text{NO}_3\text{F}$ , MW: 331.38  $\text{g mol}^{-1}$ . Mp: 109.8-110.3  $^\circ\text{C}$ .  $[\alpha]_D^{20}$ : +10.1 ( $c = 0.10$ ,  $\text{CH}_2\text{Cl}_2$ ).  $^1\text{H}$  NMR (300 MHz,  $\text{CDCl}_3$ , 21  $^\circ\text{C}$ ) of the (*S,R*)/(*R,S*)-diastereomer:  $\delta = 7.43$ -7.38 (*m*, 2H, arom. *H*), 7.35-7.31 (*m*, 1H, arom. *H*), 7.14-7.07 (*m*, 1H, arom. *H*), 2.82-2.71 (*m*, 1H, *CH*), 2.64-2.52 (*m*, 2H,  $\text{CH}_2$ ), 2.48-2.41 (*m*, 1H,  $\text{CH}_2$ ), 2.37-2.25 (*m*, 1H,  $\text{CH}_2$ ), 2.08-1.99 (*m*, 1H,  $\text{CH}_2$ ), 1.65-1.47 (*m*, 3H,  $\text{CH}_2$ ), 1.44 (*s*, 9H,  $\text{CH}_3$ ).  $^{13}\text{C}$  NMR (75 MHz,  $\text{CDCl}_3$ , 21  $^\circ\text{C}$ ) of the (*S,R*)/(*R,S*)-diastereomer:  $\delta = 208.3$ , 164.7, 163.0 (*d*,  $J = 247.7$ , *CF*), 135.5 (*d*,  $J = 7.3$ , *CCCF*), 130.8 (*d*,  $J = 8.4$ , *CCCF*), 122.1 (*d*,  $J = 2.8$ , *CCCCF*), 116.5, 116.2 (*d*,  $J = 20.7$ , *CCF*), 113.7 (*d*,  $J = 24.1$ , *CCF*), 85.5, 60.3, 45.4, 44.5, 40.7, 27.6, 25.8, 24.0.  $^{19}\text{F}$  NMR (235 MHz,  $\text{CDCl}_3$ , 21  $^\circ\text{C}$ ) of the (*S,R*)/(*R,S*)-diastereomer:  $\delta = -110.54$ . IR (solid) of the (*S,R*)/(*R,S*)-diastereomer:  $\nu = 2975$ , 2941, 2876, 2856, 1730, 1716, 1614, 1589, 1489, 1444, 1392, 1369, 1283, 1249, 1231, 1200, 1145, 1069.

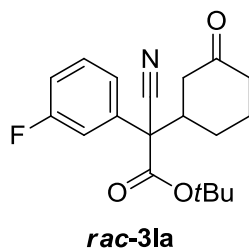

According to GP2 *tert*-butyl-2-cyano-2-(3-fluorophenyl)acetate **11** (249.0 mg, 1.06 mmol, 1 equiv) was treated with 2-cyclohexen-1-one **2a** (101.7 mg, 1.06 mmol, 1 equiv). Column chromatography (petrol ether:EtOAc = 9:1  $\rightarrow$  4:1) of the crude product yielded **rac-3la** (199.0 mg, 0.60 mmol, 57%) as a colorless oil with a  $dr_{(R,R+S,S):(S,R+R,S)}$  of 43:57. The diastereomers were separated by column chromatography ( $\text{CH}_2\text{Cl}_2 + 1\% \text{Et}_2\text{O}$ ).

$\text{C}_{19}\text{H}_{22}\text{NO}_3\text{F}$ , MW: 331.38  $\text{g mol}^{-1}$ .  $^1\text{H}$  NMR (300 MHz,  $\text{CDCl}_3$ , 21  $^\circ\text{C}$ ) of the (*R,R*)/(*S,S*)-diastereomer:  $\delta = 7.43$ -7.25 (*m*, 3H, arom. *H*), 7.09 (*tdd*,  $J = 8.1, 2.3, 1.0$ , 1H, arom. *H*), 2.82-2.71 (*m*, 1H, *CH*), 2.46-2.40 (*m*, 1H,  $\text{CH}_2$ ), 2.37-2.26 (*m*, 1H,  $\text{CH}_2$ ), 2.22-2.06 (*m*, 3H,  $\text{CH}_2$ ), 1.90-1.82 (*m*, 1H,  $\text{CH}_2$ ), 1.79-1.58 (*m*, 2H,  $\text{CH}_2$ ), 1.45 (*s*, 9H,  $\text{CH}_3$ ).  $^{13}\text{C}$  NMR (75 MHz,  $\text{CDCl}_3$ ,

**21 °C) of the (R,R)/(S,S)-diastereomer:**  $\delta = 208.6, 165.2, 163.0$  (*d*,  $J = 247.7$ , CF),  $134.7$  (*d*,  $J = 7.3$ , CCCF),  $130.9$  (*d*,  $J = 8.4$ , CCCF),  $121.9$  (*d*,  $J = 2.8$ , CCCCFF),  $116.4, 116.3$  (*d*,  $J = 20.7$ , CCF),  $113.6$  (*d*,  $J = 24.1$ , CCF),  $85.4, 60.20, 60.18, 45.1, 42.5, 40.9, 28.1, 27.6, 24.2$ . **<sup>19</sup>F NMR (235 MHz, CDCl<sub>3</sub>, 21 °C) of the (R,R)/(S,S)-diastereomer:**  $\delta = -110.39$ . **IR (solid) of the (R,R)/(S,S)-diastereomer:**  $\nu = 3077, 2979, 2931, 2869, 2245, 1737, 1715, 1614, 1591, 1492, 1444, 1392, 1369, 1250, 1230, 1150, 1115, 1060$ . **MS (ESI) *m/z*:** 354.15 ([M+Na]<sup>+</sup>, 100%). **HRMS (ESI) *m/z*:** Calc. for [M+Na]<sup>+</sup>: 354.1476. Found: 354.1481.

### ***tert*-Butyl-2-cyano-2-(4-methoxyphenyl)-2-(3-oxocyclohexyl)-acetate (3ma)**

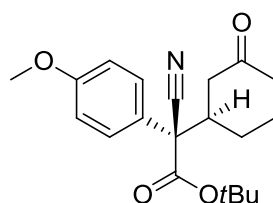

**(S,R)-3ma**

According to GP3 *tert*-butyl-2-cyano-2-(4-methoxyphenyl)acetate **1m** (40.7 mg, 0.16 mmol, 1 equiv) was treated with 2-cyclohexen-1-one **2a** (32.1 mg, 0.33 mmol, 2 equiv) in the presence of **FIP-O<sub>2</sub>CC<sub>3</sub>F<sub>7</sub>** (1.07 mg, 0.82  $\mu$ mol, 0.5 mol%) to yield **(S,R)-3ma** (49.5 mg, 0.14 mmol, 90%,  $ee_{(S,R)} = 89\%$ ,  $ee_{(R,R)} = 98\%$ ,  $dr_{(S,R+S):(R,R+S,S)} = 80:20$ ) as a colorless oil. The  $dr$  and  $ee$  values were determined by chiral column HPLC after reduction of the keto-group with NaBH<sub>4</sub> (see following procedure, **6ma**, S-57).

**C<sub>20</sub>H<sub>25</sub>NO<sub>4</sub>**, MW: 343.42 g mol<sup>-1</sup>. [ $\alpha$ ]<sub>D</sub><sup>20</sup>: +19.2 (*c* = 0.11, CH<sub>2</sub>Cl<sub>2</sub>).

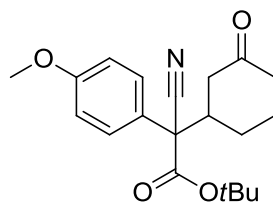

**rac-3ma**

According to GP2 *tert*-butyl-2-cyano-2-(4-methoxyphenyl)acetate **1m** (246.6 mg, 1.00 mmol, 1 equiv) was treated with 2-cyclohexen-1-one **2a** (95.9 mg, 1.00 mmol, 1 equiv). Column chromatography (petrol ether:EtOAc = 9:1  $\rightarrow$  4:1) of the crude product yielded **rac-3ma**

(105.7 mg, 0.31 mmol, 31%) as a colorless oil with a  $dr_{(R,R+S,S):(S,R+R,S)}$  of 37:63. The mixture of diastereomers is inseparable by column chromatography.

**C<sub>20</sub>H<sub>25</sub>NO<sub>4</sub>**, MW: 343.42 g mol<sup>-1</sup>. **<sup>1</sup>H NMR (300 MHz, CDCl<sub>3</sub>, 21 °C) mixture of diastereomers** ((*R,R*)/(*S,S*) is marked with \*, (*S,R*)/(*R,S*) with #):  $\delta$  = 7.49<sup>#</sup> (*d*, *J* = 8.9, 2H, *o*-H), 7.43\* (*d*, *J* = 8.9, 2H, *o*-H), 6.94-6.89 (*m*, 2H, *m*-H), 3.83<sup>#</sup> (*s*, 3H, OCH<sub>3</sub>), 3.82\* (*s*, 3H, OCH<sub>3</sub>), 2.81-2.70 (*m*, 1H, CH), 2.63-2.47 (*m*, 1H, CH<sub>2</sub>), 2.46-2.25 (*m*, 2H, CH<sub>2</sub>), 2.21-2.13 (*m*, 1H, CH<sub>2</sub>), 2.11-1.99 (*m*, 2H, CH<sub>2</sub>), 1.95-1.68 (*m*, 2H, CH<sub>2</sub>), 1.43\* (*s*, 9H, CH<sub>3</sub>), 1.42<sup>#</sup> (*s*, 9H, CH<sub>3</sub>). **<sup>13</sup>C NMR (75 MHz, CDCl<sub>3</sub>, 21 °C) mixture of diastereomers** ((*R,R*)/(*S,S*) is marked with \*, (*S,R*)/(*R,S*) with #):  $\delta$  = 209.2\*, 208.7<sup>#</sup>, 165.9\*, 165.4<sup>#</sup>, 160.0\*, 159.9<sup>#</sup>, 127.5<sup>#</sup>, 127.3\*, 124.9<sup>#</sup>, 124.1\*, 117.1<sup>#</sup>, 117.0\*, 114.6\*, 114.5<sup>#</sup>, 84.9<sup>#</sup>, 84.7\*, 59.9<sup>#</sup>, 59.8\*, 55.4, 45.2<sup>#</sup>, 44.9\*, 42.6, 41.0\*, 40.8<sup>#</sup>, 28.2\*, 27.6, 25.8<sup>#</sup>, 24.4\*, 24.1<sup>#</sup>. **IR (film)**:  $\nu$  = 2939, 1732, 1713, 1608, 1510, 1459, 1370, 1249, 1148, 1031. **HRMS (ESI) *m/z***: Calc. for [C<sub>20</sub>H<sub>25</sub>NO<sub>4</sub> + Na]<sup>+</sup>: 366.1681. Found: 366.1677. **Microanalysis**: Calc. for C<sub>20</sub>H<sub>25</sub>NO<sub>4</sub>: C: 69.95; H: 7.34; N: 4.08. Found: C: 69.71; H: 7.31; N: 4.06.

### ***tert*-Butyl-2-cyano-2-(3-oxocyclopentyl)-2-phenylacetate (3ab)**

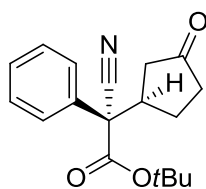

**(*R,R*)-3ab**

According to GP3 *tert*-butyl-2-cyano-2-phenylacetate **1a** (20.7 mg, 0.10 mmol) was treated with 2-cyclopenten-1-one **2b** (15.6 mg, 0.19 mmol, 2 equiv) in the presence of **FBIP-O<sub>2</sub>CC<sub>3</sub>F<sub>7</sub>** (1.64 mg, 1.00  $\mu$ mol, 1 mol%) to yield **(*R,R*)-3ab** (29.6 mg, 0.10 mmol, 99%,  $ee_{(R,R)} = 90\%$ ,  $ee_{(S,R)} = 52\%$ ,  $dr_{(R,R+S,S):(S,R+R,S)} = 82:18$ ) as a colorless oil. The  $dr$  and  $ee$  values were determined by chiral column HPLC: Chiracel OD-H, *n*-hexane/*i*-PrOH (99/1), 2 mL min<sup>-1</sup>, detection at 210 nm,  $t_{(R,R)} = 9.8$  min,  $t_{(S,S)} = 38.0$  min.

**C<sub>18</sub>H<sub>21</sub>NO<sub>3</sub>**, MW: 299.36 g mol<sup>-1</sup>. [ $\alpha$ ]<sub>D</sub><sup>20</sup>: +40.1 (*c* = 0.01, CH<sub>2</sub>Cl<sub>2</sub>).

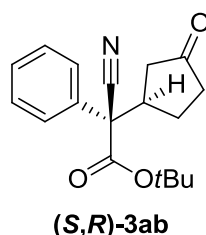

According to GP3 *tert*-butyl-2-cyano-2-phenylacetate **1a** (20.8 mg, 96  $\mu\text{mol}$ , 1 equiv) was treated with 2-cyclopenten-1-one **2b** (15.7 mg, 0.19 mmol, 2 equiv) in the presence of **FIP-O<sub>2</sub>CC<sub>3</sub>F<sub>7</sub>** (0.62 mg, 0.48  $\mu\text{mol}$ , 0.5 mol%) to yield **(S,R)-3ab** (28.5 mg, 95  $\mu\text{mol}$ , 99%,  $ee_{(S,R)} = 90\%$ ,  $ee_{(R,R)} = 42\%$ ,  $dr_{(S,R+R,S):(R,R+S,S)} = 80:20$ ) as a colorless oil. The  $dr$  and  $ee$  values were determined by chiral column HPLC: Chiracel OD-H, *n*-hexane/*i*-PrOH (99/1), 2 mL min<sup>-1</sup>, detection at 210 nm,  $t_{(S,R)} = 15.5$  min,  $t_{(R,S)} = 11.6$  min.

**C<sub>18</sub>H<sub>21</sub>NO<sub>3</sub>**, MW: 299.36 g mol<sup>-1</sup>.  $[\alpha]_D^{20}$ : +66.3 ( $c = 0.25$ , CH<sub>2</sub>Cl<sub>2</sub>).

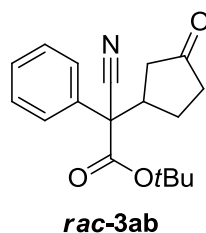

According to GP2 *tert*-butyl-2-cyano-2-phenylacetate **1a** (251.8 mg, 1.16 mmol, 1 equiv) was treated with 2-cyclopenten-1-one **2b** (95.2 mg, 1.16 mmol, 1 equiv). Column chromatography (petrol ether:EtOAc = 9:1  $\rightarrow$  4:1) of the crude product yielded **rac-3ab** (254.5 mg, 0.85 mmol, 73%) as a colorless oil with a  $dr_{(R,R+S,S):(S,R+R,S)}$  of 42:58. The mixture of diastereomers is inseparable by column chromatography.

**C<sub>18</sub>H<sub>21</sub>NO<sub>3</sub>**, MW: 299.36 g mol<sup>-1</sup>. **<sup>1</sup>H NMR (300 MHz, CDCl<sub>3</sub>, 21 °C) mixture of diastereomers** ((*R,R*)/(*S,S*) is marked with \*, (*S,R*)/(*R,S*) with #):  $\delta = 7.61\text{--}7.52$  (*m*, 2H, arom. *H*), 7.47–7.37 (*m*, 3H, arom. *H*), 3.32–3.13 (*m*, 1H, CH), 2.66–2.48 (*m*, 1H, CH<sub>2</sub>), 2.45–2.26 (*m*, 2H, CH<sub>2</sub>), 2.23–1.90 (*m*, 1H, CH<sub>2</sub>), 1.79–1.64 (*m*, 2H, CH<sub>2</sub>), 1.45<sup>#</sup> (*s*, 9H, CH<sub>3</sub>), 1.43<sup>\*</sup> (*s*, 9H, CH<sub>3</sub>). **<sup>13</sup>C NMR (75 MHz, CDCl<sub>3</sub>, 21 °C) mixture of diastereomers** ((*R,R*)/(*S,S*) is marked with \*, (*S,R*)/(*R,S*) with #):  $\delta = 215.5^*$ , 215.0<sup>#</sup>, 165.6, 133.7<sup>#</sup>, 133.2<sup>\*</sup>, 129.2<sup>\*</sup>, 129.1<sup>#</sup>, 126.0<sup>\*</sup>, 125.8<sup>#</sup>, 116.9, 85.0, 59.5<sup>\*</sup>, 59.4<sup>#</sup>, 44.0<sup>#</sup>, 43.8<sup>\*</sup>, 41.9<sup>\*</sup>, 40.6<sup>#</sup>, 38.4<sup>#</sup>, 38.0<sup>\*</sup>, 27.6<sup>\*</sup>, 27.5, 26.2<sup>#</sup>, 24.9. **IR (film):**  $\nu = 2979, 1736, 1450, 1370, 1254, 1148, 1034$ . **HRMS (ESI) *m/z*:** Calc. for

$[\text{C}_{18}\text{H}_{21}\text{NO}_3 + \text{Na}]^+$ : 322.1414. Found: 322.1423. **Microanalysis:** Calc. for  $\text{C}_{18}\text{H}_{21}\text{NO}_3$ : C: 72.22; H: 7.07; N: 4.68. Found: C: 71.92; H: 7.12; N: 4.51.

### ***tert*-Butyl-2-cyano-2-(3-oxocycloheptyl)-2-phenylacetate (3ac)**

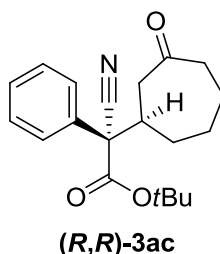

According to GP3 *tert*-butyl-2-cyano-2-phenylacetate **1a** (9.40 mg, 43  $\mu\text{mol}$ , 1 equiv) was treated with 2-cyclohepten-1-one **2c** (9.53 mg, 87  $\mu\text{mol}$ , 2 equiv) in the presence of **FBIP-O<sub>2</sub>CC<sub>3</sub>F<sub>7</sub>** (1.43 mg, 0.87  $\mu\text{mol}$ , 2 mol%) to yield **(R,R)-3ac** (10.0 mg, 31  $\mu\text{mol}$ , 71%,  $ee_{(R,R)} = 85\%$ ,  $ee_{(S,R)} = 52\%$ ,  $dr_{(R,R+S,S):(S,R+R,S)} = 86:14$ ) as a colorless oil. The  $dr$  value was determined by  $^1\text{H}$  NMR. The  $ee$  values were determined by chiral column HPLC: Chiracel OD-H, *n*-hexane/*i*-PrOH (99/1), 2 mL  $\text{min}^{-1}$ , detection at 210 nm,  $t_{(R,R)} = 5.6$  min,  $t_{(S,S)} = 7.0$  min. The major diastereomer was isolated by column chromatography ( $\text{CH}_2\text{Cl}_2 + 1\% \text{Et}_2\text{O}$ ).

$\text{C}_{20}\text{H}_{25}\text{NO}_3$ , MW: 327.42  $\text{g mol}^{-1}$ .  $[\alpha]_{\text{D}}^{20}$ : +42.9 ( $c = 0.01$ ,  $\text{CH}_2\text{Cl}_2$ ).  $^1\text{H}$  NMR (300 MHz,  $\text{CDCl}_3$ , 21 °C) of the **(R,R)/(S,S)**-diastereomer: 7.58-7.54 (*m*, 2H, arom. *H*), 7.45-7.37 (*m*, 3H, arom. *H*), 2.88-2.79 (*m*, 1H, *CH*), 2.53-2.40 (*m*, 3H, *CH*<sub>2</sub>), 2.12-1.96 (*m*, 4H, *CH*<sub>2</sub>), 1.74-1.48 (*m*, 3H, *CH*<sub>2</sub>), 1.41 (*s*, 9H, *CH*<sub>3</sub>).  $^{13}\text{C}$  NMR (75 MHz,  $\text{CDCl}_3$ , 21 °C) of the **(R,R)/(S,S)**-diastereomer:  $\delta = 211.6, 166.0, 133.0, 129.3, 129.1, 126.3, 116.8, 84.8, 61.1, 44.7, 43.6, 42.6, 34.2, 28.7, 27.6, 24.4$ .

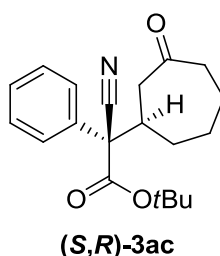

According to GP3 *tert*-butyl-2-cyano-2-phenylacetate **1a** (10.4 mg, 48  $\mu\text{mol}$ , 1 equiv) was treated with 2-cyclohepten-1-one **2c** (10.6 mg, 96  $\mu\text{mol}$ , 2 equiv) in the presence of **FIP-O<sub>2</sub>CC<sub>3</sub>F<sub>7</sub>** (2.50 mg, 1.92  $\mu\text{mol}$ , 4 mol%) to yield **(S,R)-3ac** (7.54 mg, 23  $\mu\text{mol}$ , 48%,  $ee_{(S,R)} =$

72%,  $ee_{(R,R)} = 23\%$ ,  $dr_{(S,R+R,S):(R,R+S,S)} = 58:42$ ) as a colorless oil. The  $dr$  value was determined by  $^1\text{H}$  NMR. The  $ee$  values were determined by chiral column HPLC: Chiracel OD-H, *n*-hexane/*i*-PrOH (99/1), 2 mL min<sup>-1</sup>, detection at 210 nm,  $t_{(S,R)} = 6.3$  min,  $t_{(R,S)} = 32.2$  min. The minor diastereomer could not be removed by column chromatography.

**C<sub>20</sub>H<sub>25</sub>NO<sub>3</sub>**, MW: 327.42 g mol<sup>-1</sup>.  $[\alpha]_D^{20}$ : +13.0 (*c* = 0.05, CH<sub>2</sub>Cl<sub>2</sub>).

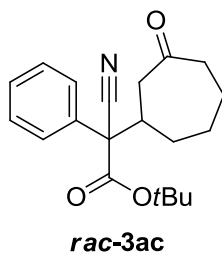

According to GP2 *tert*-butyl-2-cyano-2-phenylacetate **1a** (257.0 mg, 1.18 mmol, 1 equiv) was treated with 2-cyclohepten-1-one **2c** (130.3 mg, 1.18 mmol, 1 equiv). Column chromatography (petrol ether:EtOAc = 9:1 → 4:1) of the crude product yielded **rac-3ac** (305.9 mg, 0.93 mmol, 79%) as a colorless oil with a  $dr_{(R,R+S,S):(S,R+R,S)}$  of 48:52.

**C<sub>20</sub>H<sub>25</sub>NO<sub>3</sub>**, MW: 327.42 g mol<sup>-1</sup>.  $^1\text{H}$  NMR (300 MHz, CDCl<sub>3</sub>, 21 °C) mixture of diastereomers ((*R,R*)/(*S,S*) is marked with \*, (*S,R*)/(*R,S*) with #):  $\delta = 7.61\text{-}7.55$  (*m*, 2H, arom. *H*), 7.45-7.38 (*m*, 3H, arom. *H*), 2.92-2.73 (*m*, 2H, *CH*), 2.61-2.39 (*m*, 3H, *CH*<sub>2</sub>), 2.06-1.85 (*m*, 2H, *CH*<sub>2</sub>), 1.70-1.49 (*m*, 2H, *CH*<sub>2</sub>), 1.42\* (*s*, 9H, *CH*<sub>3</sub>), 1.41# (*s*, 9H, *CH*<sub>3</sub>), 1.36-1.18 (*m*, 2H, *CH*<sub>2</sub>).  $^{13}\text{C}$  NMR (75 MHz, CDCl<sub>3</sub>, 21 °C) mixture of diastereomers ((*R,R*)/(*S,S*) is marked with \*, (*S,R*)/(*R,S*) with #):  $\delta = 211.1, 165.8, 133.5, 129.3^\#, 129.2, 129.0^*, 126.4^*, 126.3^\#, 116.8, 85.0^*, 84.8^\#, 61.1, 46.9^*, 44.7^\#, 43.7, 42.7, 34.2^\#, 31.4^*, 28.7^\#, 28.5^*, 27.6, 24.4^\#, 24.1^*$ . IR (film):  $\nu = 2934, 1734, 1703, 1449, 1370, 1250, 1147, 1034$ . HRMS (ESI) *m/z*: Calc. for [C<sub>20</sub>H<sub>25</sub>NO<sub>3</sub> + Na]<sup>+</sup>: 350.1727. Found: 350.1724. Microanalysis: Calc. for C<sub>20</sub>H<sub>25</sub>NO<sub>3</sub>: C: 73.37; H: 7.70; N: 4.28. Found: C: 73.11; H: 7.73; N: 4.14.

## ***tert*-Butyl-2-cyano-2-(3,3-dimethyl-5-oxocyclohexyl)-2-phenylacetate (3ad)**

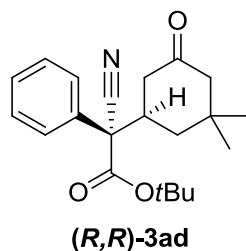

According to GP3 *tert*-butyl-2-cyano-2-phenylacetate **1a** (11.8 mg, 54  $\mu$ mol, 1 equiv) was treated with 5,5-dimethyl-2-cyclohexen-1-one **2d** (13.5 mg, 0.11 mmol, 2 equiv) in the presence of **FBIP-O<sub>2</sub>CC<sub>3</sub>F<sub>7</sub>** (1.79 mg, 1.09 mmol, 2 mol%) to yield (***R,R***-3ad (7.56 mg, 22  $\mu$ mol, 41%,  $ee_{(R,R)} = 89\%$ ,  $ee_{(S,R)} = 41\%$ ,  $dr_{(R,R+S,S):(S,R+R,S)} = 84:16$ ) as a colorless oil. The  $dr$  value was determined by <sup>1</sup>H NMR. The  $ee$  values were determined by chiral column HPLC: Chiracel OD-H, *n*-hexane/*i*-PrOH (99/1), 0.7 mL min<sup>-1</sup>, detection at 210 nm,  $t_{(R,R)} = 14.2$  min,  $t_{(S,S)} = 10.7$  min. The major diastereomer was isolated by column chromatography (CH<sub>2</sub>Cl<sub>2</sub> + 1% Et<sub>2</sub>O).

**C<sub>21</sub>H<sub>27</sub>NO<sub>3</sub>**, MW: 341.44 g mol<sup>-1</sup>. [ $\alpha$ ]<sub>D</sub><sup>20</sup>: +8.1(c = 0.09, CH<sub>2</sub>Cl<sub>2</sub>). <sup>1</sup>H NMR (300 MHz, CDCl<sub>3</sub>, 21 °C) of the (***R,R***)/(***S,S***)-diastereomer:  $\delta = 7.55$ -7.51 (*m*, 2H, arom. *H*), 7.44-7.36 (*m*, 3H, arom. *H*), 3.02-2.91 (*m*, 1H, arom. *H*), 2.28-2.24 (*m*, 1H, CH<sub>2</sub>), 2.17-2.11 (*m*, 1H, CH<sub>2</sub>), 2.08-1.99 (*m*, 1H, CH<sub>2</sub>), 1.90-1.75 (*m*, 3H, CH<sub>2</sub>), 1.43 (*s*, 9H, CH<sub>3</sub>), 1.15 (*s*, 3H, CH<sub>3</sub>), 0.99 (*s*, 3H, CH<sub>3</sub>). <sup>13</sup>C NMR (75 MHz, CDCl<sub>3</sub>, 21 °C) of the (***R,R***)/(***S,S***)-diastereomer:  $\delta = 208.4$ , 165.0, 132.4, 132.1, 127.9, 123.4, 116.6, 85.5, 60.2, 54.0, 43.5, 41.5, 38.9, 34.0, 31.7, 27.6, 25.5.

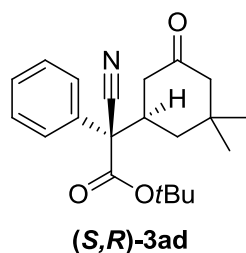

According to GP3 *tert*-butyl-2-cyano-2-phenylacetate **1a** (100.0 mg, 0.46 mmol, 1 equiv) was treated with 5,5-dimethyl-2-cyclohexen-1-one **2d** (114.3 mg, 0.92 mmol, 2 equiv) in the presence of **FIP-O<sub>2</sub>CC<sub>3</sub>F<sub>7</sub>** (6.0 mg, 0.46  $\mu$ mol, 1 mol%) to yield (***S,R***-3ad (69.1 mg, 0.20 mmol, 44%,  $ee_{(S,R)} = 96\%$ ,  $ee_{(R,R)} = 36\%$ ,  $dr_{(S,R+R,S):(R,R+S,S)} = 91:09$ ) as a colorless oil. The  $dr$  value was determined by <sup>1</sup>H NMR. The  $ee$  values were determined by chiral column HPLC:



Chiracel OD-H, *n*-hexane/*i*-PrOH (99/1), 0.7 mL min<sup>-1</sup>, detection at 210 nm,  $t_{(S,R)} = 11.7$  min,  $t_{(R,S)} = 18.4$  min. The minor diastereomer could not be removed by column chromatography.

**C<sub>21</sub>H<sub>27</sub>NO<sub>3</sub>**, MW: 341.44 g mol<sup>-1</sup>. [ $\alpha$ ]<sub>D</sub><sup>20</sup>: +11.0 (c = 0.18, CH<sub>2</sub>Cl<sub>2</sub>).

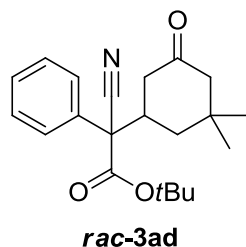

According to GP2 *tert*-butyl-2-cyano-2-phenylacetate **1a** (150.6 mg, 0.69 mmol, 1 equiv) was treated with 5,5-dimethyl-2-cyclohexen-1-one **2d** (86.1 mg, 0.69 mmol, 1 equiv). Column chromatography (petrol ether:EtOAc = 9:1 → 4:1) of the crude product yielded ***rac*-3ad** (89.9 mg, 0.26 mmol, 38%) as a colorless oil with a  $dr_{(R,R+S,S):(S,R+R,S)}$  of 37:63.

**C<sub>21</sub>H<sub>27</sub>NO<sub>3</sub>**, MW: 341.44 g mol<sup>-1</sup>. <sup>1</sup>H NMR (300 MHz, CDCl<sub>3</sub>, 21 °C) mixture of diastereomers ((*R,R*)/(*S,S*) is marked with \*, (*S,R*)/(*R,S*) with #):  $\delta = 7.61$ -7.51 (*m*, 2H, arom. *H*), 7.46-7.39 (*m*, 3H, arom. *H*), 3.05-2.94 (*m*, 1H, arom. *H*), 2.27-2.23 (*m*, 1H, CH<sub>2</sub>), 2.77-2.72 (*m*, 1H, CH<sub>2</sub>), 2.59-2.41 (*m*, 3H, CH<sub>2</sub>), 2.19-2.11 (*m*, 1H, CH<sub>2</sub>), 1.45<sup>#</sup> (*s*, 9H, CH<sub>3</sub>), 1.43\* (*s*, 9H, CH<sub>3</sub>), 1.29<sup>#</sup> (*s*, 3H, CH<sub>3</sub>), 1.15\* (*s*, 3H, CH<sub>3</sub>), 0.99\* (*s*, 3H, CH<sub>3</sub>), 0.83<sup>#</sup> (*s*, 3H, CH<sub>3</sub>). <sup>13</sup>C NMR (63 MHz, CDCl<sub>3</sub>, 21 °C) mixture of diastereomers:  $\delta = 208.8$ , 205.1, 165.5, 165.3, 132.9, 131.4, 129.6, 129.4, 129.2, 129.0, 126.2, 126.0, 117.0, 116.8, 85.1, 84.7, 60.6, 55.1, 54.0, 52.5, 52.2, 44.4, 43.6, 41.3, 39.0, 38.8, 34.0, 31.7, 27.57, 27.50, 26.1, 25.5, 25.2. IR (in CH<sub>2</sub>Cl<sub>2</sub>):  $\nu = 2958$ , 2358, 1737, 1716, 1450, 1371, 1254, 1151, 1034. MS (ESI)  $m/z$ : 364.19 ([M+Na]<sup>+</sup>, 100%), 287.14 ([M+Na - C<sub>6</sub>H<sub>5</sub>]<sup>+</sup>, 35%). HRMS (ESI)  $m/z$ : Calc. for [M+Na]<sup>+</sup>: 364.1883. Found: 364.1886.

### ***tert*-Butyl-2-cyano-2-(4-chlorophenyl)-2-(3,3-dimethyl-5-oxocyclohexyl)acetate (3hd)**

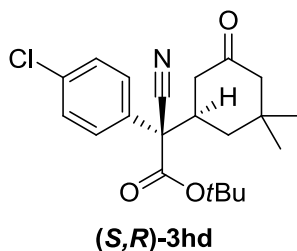

According to GP3 *tert*-butyl-2-cyano-2-(4-chlorophenyl)acetate **1h** (60.0 mg, 0.21 mmol, 1 equiv) was treated with 5,5-dimethyl-2-cyclohexen-1-one **2d** (51.9 mg, 0.42 mmol, 2 equiv) in the presence of **FIP-O<sub>2</sub>CC<sub>3</sub>F<sub>7</sub>** (2.7 mg, 0.21 μmol, 1 mol%) to yield (*S,R*)-**3hd** (68.7 mg, 0.18 mmol, 87%,  $ee_{(S,R)} = 92%$ ,  $ee_{(R,R)} = 42%$ ,  $dr_{(S,R+R,S):(R,R+S,S)} = 86:14$ ) as a colorless solid. The  $dr$  value was determined by <sup>1</sup>H NMR. The  $ee$  values were determined by chiral column HPLC: Chiracel OD-H, *n*-hexane/*i*-PrOH (99/1), 0.7 mL min<sup>-1</sup>, detection at 210 nm,  $t_{(S,R)} = 15.5$  min,  $t_{(R,S)} = 10.1$  min. The major diastereomer was isolated by column chromatography (CH<sub>2</sub>Cl<sub>2</sub> + 1% Et<sub>2</sub>O).

**C<sub>21</sub>H<sub>26</sub>NO<sub>3</sub>Cl**, MW: 375.89 g mol<sup>-1</sup>. **Mp**: 122.8-123.4 °C. **[α]<sub>D</sub><sup>20</sup>**: +7.7 (c = 0.10, CH<sub>2</sub>Cl<sub>2</sub>). **<sup>1</sup>H NMR (300 MHz, CDCl<sub>3</sub>, 21 °C) of the (*S,R*)/(*R,S*)-diastereomer**: δ = 7.53 (*d*, *J* = 9.0, 2H, arom. *H*), 7.42 (*d*, *J* = 9.0, 2H, arom. *H*), 2.99-2.88 (*m*, 1H, CH), 2.58-2.51 (*m*, 1H, CH<sub>2</sub>), 2.47-2.39 (*m*, 1H, CH<sub>2</sub>), 2.27-2.22 (*m*, 1H, CH<sub>2</sub>), 2.17-2.11 (*m*, 1H, CH<sub>2</sub>), 1.51-1.47 (*m*, 1H, CH<sub>2</sub>), 1.42 (*s*, 9H, CH<sub>3</sub>), 1.10-1.03 (*m*, 1H, CH<sub>2</sub>), 0.99 (*s*, 3H, CH<sub>3</sub>), 0.82 (*s*, 3H, CH<sub>3</sub>). **<sup>13</sup>C NMR (75 MHz, CDCl<sub>3</sub>, 21 °C) of the (*S,R*)/(*R,S*)-diastereomer**: δ = 208.5, 165.0, 135.3, 131.5, 129.5, 127.7, 116.6, 85.5, 60.1, 54.0, 43.5, 41.5, 38.9, 34.0, 31.7, 27.6, 25.5. **IR (solid) of the (*S,R*)/(*R,S*)-diastereomer**: ν = 2964, 2875, 2248, 1729, 1709, 1593, 1494, 1468, 1371, 1279, 1253, 1194, 1150, 1097, 1087, 1013.

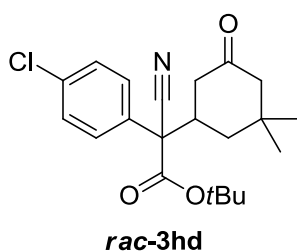

According to GP2 *tert*-butyl-2-cyano-2-(4-chlorophenyl)acetate **1h** (40.6 mg, 0.16 mmol, 1 equiv) was treated with 5,5-dimethyl-2-cyclohexen-1-one **2d** (20.0 mg, 0.16 mmol, 1 equiv)

for 69 h. Column chromatography (petrol ether:EtOAc = 9:1 → 4:1) of the crude product yielded **rac-3hd** (36.4 mg, 0.10 mmol, 60%) as a colorless solid with a  $dr_{(R,R+S,S):(S,R+R,S)}$  of 40:60. The diastereomers were separated by column chromatography (CH<sub>2</sub>Cl<sub>2</sub> + 1% Et<sub>2</sub>O).

**C<sub>21</sub>H<sub>26</sub>NO<sub>3</sub>Cl**, MW: 375.89 g mol<sup>-1</sup>. **Mp**: 140.3-141.1 °C. **<sup>1</sup>H NMR (300 MHz, CDCl<sub>3</sub>, 21 °C) of the (R,R)/(S,S)-diastereomer:** δ = 7.49 (*d*, *J* = 8.9, 2H, arom. *H*), 7.39 (*d*, *J* = 8.9, 2H, arom. *H*), 2.96-2.85 (*m*, 1H, arom. *H*), 2.28-2.24 (*m*, 1H, CH<sub>2</sub>), 2.18-2.12 (*m*, 1H, CH<sub>2</sub>), 2.07-1.98 (*m*, 1H, CH<sub>2</sub>), 1.88-1.72 (*m*, 3H, CH<sub>2</sub>), 1.44 (*s*, 9H, CH<sub>3</sub>), 1.15 (*s*, 3H, CH<sub>3</sub>), 0.98 (*s*, 3H, CH<sub>3</sub>). **<sup>13</sup>C NMR (75 MHz, CDCl<sub>3</sub>, 21 °C) of the (R,R)/(S,S)-diastereomer:** δ = 208.7, 165.1, 135.4, 131.0, 129.5, 127.5, 116.5, 85.3, 60.1, 54.1, 41.6, 41.3, 34.5, 31.9, 27.6, 25.7. **IR (solid) of the (R,R)/(S,S)-diastereomer:** ν = 2965, 2872, 2249, 1728, 1713, 1595, 1494, 1461, 1405, 1372, 1272, 1256, 1146, 1100, 1016. **MS (ESI) *m/z*:** 398.15 ([M+Na]<sup>+</sup>, 100%). **HRMS (ESI) *m/z*:** Calc. for [M+Na]<sup>+</sup>: 398.1493. Found: 398.1499.

### **tert-Butyl-2-cyano-2-(4-bromophenyl)-2-(3,3-dimethyl-5-oxocyclohexyl)acetate (3id)**

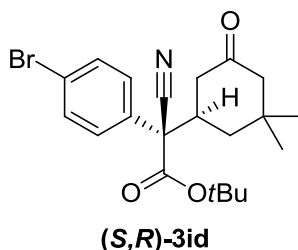

According to GP3 *tert*-butyl-2-cyano-2-(4-bromophenyl)acetate **1i** (129.3 mg, 0.44 mmol, 1 equiv) was treated with 5,5-dimethyl-2-cyclohexen-1-one **2d** (108.4 mg, 0.87 mmol, 2 equiv) in the presence of **FIP-O<sub>2</sub>CC<sub>3</sub>F<sub>7</sub>** (5.7 mg, 0.44 μmol, 1 mol%) to yield **(S,R)-3id** (125.8 mg, 0.30 mmol, 68%,  $ee_{(S,R)} = 91%$ ,  $ee_{(R,R)} = 91%$ ,  $dr_{(S,R+R,S):(R,R+S,S)} = 82:18$ ) as a colorless oil. The  $dr$  and  $ee$  values were determined by chiral column HPLC: Chiracel OD-H, *n*-hexane/*i*-PrOH (99/1), 0.7 mL min<sup>-1</sup>, detection at 210 nm,  $t_{(S,R)} = 17.2$  min,  $t_{(R,S)} = 11.1$  min. The major diastereomer was isolated by column chromatography (CH<sub>2</sub>Cl<sub>2</sub> + 1% Et<sub>2</sub>O).

Constitution of **3id** was confirmed by X-ray crystal structure analysis. **3id** crystallized preferentially in racemic form (from a sample with both diastereomers,  $ee_{(S,R)} = 91%$  and  $ee_{(R,R)} = 91%$ ) in *n*-hexane/*i*PrOH at room temperature. The unit cell contains both diastereomers. CCDC 856195 contains the supplementary crystallographic data for this compound. These data

can be obtained free of charge from the Cambridge Crystallographic Data Centre via [www.ccdc.cam.ac.uk/data\\_request/cif](http://www.ccdc.cam.ac.uk/data_request/cif).

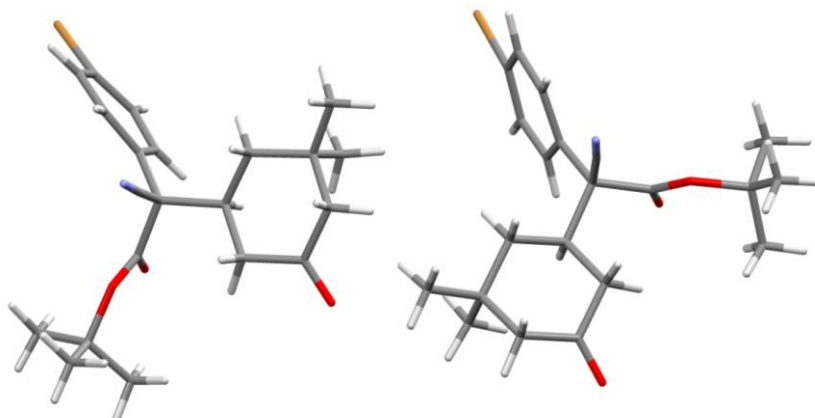

X-ray crystal structure of **3id** [color code: C (grey); N (blue); Br (brown); O (red); H (white)].

$C_{21}H_{26}NO_3Br$ , MW: 420.34 g mol<sup>-1</sup>. [ $\alpha$ ]<sub>D</sub><sup>20</sup>: +27.4 (c = 0.10, CH<sub>2</sub>Cl<sub>2</sub>). <sup>1</sup>H NMR (300 MHz, CDCl<sub>3</sub>, 21 °C) of the (*S,R*)/(*R,S*)-diastereomer:  $\delta$  = 7.55 (*d*, *J* = 7.9, 2H, *m-H*), 7.43 (*d*, *J* = 8.5, 2H, *o-H*), 2.99-2.89 (*m*, 1H, CH), 2.55-2.48 (*m*, 1H, CH<sub>2</sub>), 2.44-2.35 (*m*, 1H, CH<sub>2</sub>), 2.26-2.21 (*m*, 1H, CH<sub>2</sub>), 2.19-2.13 (*m*, 1H, CH<sub>2</sub>), 1.51-1.47 (*m*, 1H, CH<sub>2</sub>), 1.42 (*s*, 9H, CH<sub>3</sub>), 1.10-1.02 (*m*, 1H, CH<sub>2</sub>), 0.95 (*s*, 3H, CH<sub>3</sub>), 0.80 (*s*, 3H, CH<sub>3</sub>). <sup>13</sup>C NMR (75 MHz, CDCl<sub>3</sub>, 21 °C) of the (*S,R*)/(*R,S*)-diastereomer:  $\delta$  = 208.5, 165.0, 135.3, 131.5, 129.5, 127.7, 116.6, 85.5, 60.1, 54.0, 43.5, 41.5, 38.9, 34.0, 31.7, 27.6, 25.5. IR (film) of the (*S,R*)/(*R,S*)-diastereomer:  $\nu$  = 2958, 2247, 1736, 1714, 1494, 1450, 1370, 1250, 1148, 1035, 1006.

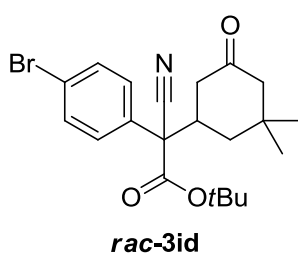

According to GP2 *tert*-butyl-2-cyano-2-(4-bromophenyl)acetate **1i** (51.2 mg, 0.17 mmol) was treated with 5,5-dimethyl-2-cyclohexen-1-one **2d** (23.7 mg, 0.19 mmol, 1.1 equiv). Column chromatography (petrol ether:EtOAc = 9:1 → 4:1) of the crude product yielded **rac-3id** (53.0 mg, 0.13 mmol, 73%) as a colorless oil with a *dr*<sub>(*R,R+S,S*):(*S,R+R,S*)</sub> of 41:59. The diastereomers were separated by column chromatography (CH<sub>2</sub>Cl<sub>2</sub> + 1% Et<sub>2</sub>O).

**C<sub>21</sub>H<sub>26</sub>NO<sub>3</sub>Br**, MW: 420.34 g mol<sup>-1</sup>. <sup>1</sup>H NMR (300 MHz, CDCl<sub>3</sub>, 21 °C) of the (*R,R*)/(*S,S*)-diastereomer:  $\delta$  = 7.56 (*d*, *J* = 8.7, 2H, *m-H*), 7.47 (*d*, *J* = 8.7, 2H, *o-H*), 2.96-2.85 (*m*, 1H, arom. *H*), 2.28-2.24 (*m*, 1H, CH<sub>2</sub>), 2.18-2.12 (*m*, 1H, CH<sub>2</sub>), 2.07-1.98 (*m*, 1H, CH<sub>2</sub>), 1.88-1.72 (*m*, 3H, CH<sub>2</sub>), 1.44 (*s*, 9H, CH<sub>3</sub>), 1.15 (*s*, 3H, CH<sub>3</sub>), 0.98 (*s*, 3H, CH<sub>3</sub>). <sup>13</sup>C NMR (75 MHz, CDCl<sub>3</sub>, 21 °C) of the (*R,R*)/(*S,S*)-diastereomer:  $\delta$  = 208.7, 165.1, 135.4, 131.0, 129.5, 127.5, 116.5, 85.3, 60.1, 54.1, 41.6, 41.3, 34.5, 31.9, 27.6, 25.7. IR (film) of the (*R,R*)/(*S,S*)-diastereomer:  $\nu$  = 2957, 2925, 2854, 2249, 1736, 1717, 1450, 1370, 1252, 1148, 1080, 1036, 1003. MS (ESI) *m/z*: 444.10 ([M+Na]<sup>+</sup>, 100%), 387.03 ([M+Na - *t*Bu]<sup>+</sup>, 14%), 364.05 ([M - *t*Bu]<sup>+</sup>, 24%). HRMS (ESI) *m/z*: Calc. for [M+Na]<sup>+</sup>: 444.0970. Found: 444.0976.

### ***tert*-Butyl-2-cyano-2-(3-oxo-2,3-dihydro-1*H*-inden-1-yl)-2-phenylacetate (3ae)**

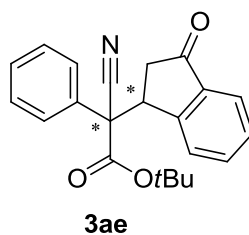

According to GP3 *tert*-butyl-2-cyano-2-phenylacetate (**1a**, 20 mg, 0.09 mmol, 1 equiv) was treated with 1*H*-inden-1-one (**2e**, 24.0 mg, 0.18 mmol, 2 equiv) in the presence of **FBIP-O<sub>2</sub>CC<sub>3</sub>F<sub>7</sub>** (3.04 mg, 1.8  $\mu$ mol, 2 mol%) to yield **3ae** (30.0 mg, 0.09 mmol, 96%, *ee*<sub>majorisomer</sub> = 62%, *ee*<sub>minorisomer</sub> = 22%, *dr*<sub>a:b</sub> = 53:47) as a colorless oil.

According to GP3 *tert*-butyl-2-cyano-2-phenylacetate (**1a**, 20.0 mg, 0.09 mmol, 1 equiv) was treated with 1*H*-inden-1-one (**2e**, 24.0 mg, 0.18 mmol, 2 equiv) in the presence of **FIP-O<sub>2</sub>CC<sub>3</sub>F<sub>7</sub>** (0.60 mg, 0.5  $\mu$ mol, 0.5 mol%) to yield **3ae** (23.5 mg, 0.07 mmol, 75%, *ee*<sub>majorisomer</sub> = 50%, *ee*<sub>minorisomer</sub> = 28%, *dr*<sub>a:b</sub> = 60:40) as a colorless oil.

Both catalysts, monopalladacycle **FIP** and bispalladacycle **FBIP**, furnish the same diastereomere (a) in excess, while the racemic reaction gave diastereomer b in excess. Therefore the reaction possibly proceeds in both cases *via* a monometallic mechanism due to the different reactivity of the enone **2e**. The *dr* and *ee* values were determined by chiral column HPLC: Chiracel AD-H, *n*-hexane/*i*-PrOH (99/1), 0.9 mL min<sup>-1</sup>, detection at 210 nm, *t*<sub>a1</sub> = 21.9 min, *t*<sub>a2</sub> = 28.3 min, *t*<sub>b1</sub> = 32.7 min, *t*<sub>b2</sub> = 90.5 min. The minor diastereomer (b) was only partially removed by column chromatography (CH<sub>2</sub>Cl<sub>2</sub> + 1% Et<sub>2</sub>O).

$C_{22}H_{21}NO_3$ , MW: 347.41 g mol<sup>-1</sup>. <sup>1</sup>H NMR (300 MHz, CDCl<sub>3</sub>, 21 °C) mixture of diastereomers (diastereomer a is marked with \*, diastereomer b with #):  $\delta$  = 7.83<sup>#</sup> (*d*, *J* = 7.44, 1H, arom. *H*), 7.80\* (*d*, *J* = 8.19, 1H, arom. *H*), 7.69-7.37 (*m*, 8H, arom. *H*), 4.70<sup>#</sup> (*dd*, *J* = 7.9, 3.5, 1H, *CH*), 4.50\* (*dd*, *J* = 7.9, 2.8, 1H, *CH*), 3.09\* (*dd*, *J* = 19.2, 7.9, 1H, *CH*<sub>2</sub>), 2.71\* (*dd*, *J* = 19.2, 3.1, 1H, *CH*<sub>2</sub>), 2.58<sup>#</sup> (*dd*, *J* = 19.4, 7.7, 1H, *CH*<sub>2</sub>), 2.27<sup>#</sup> (*dd*, *J* = 19.4, 3.5, 1H, *CH*<sub>2</sub>), 1.47<sup>#</sup> (*s*, 9H, *CH*<sub>3</sub>), 1.43\* (*s*, 9H, *CH*<sub>3</sub>). <sup>13</sup>C NMR (63 MHz, CDCl<sub>3</sub>, 21 °C) mixture of diastereomers (diastereomer a is marked with \*, diastereomer b with #):  $\delta$  = 202.9, 165.6, 150.8, 138.2, 135.1<sup>#</sup>, 134.2\*, 133.5\*, 129.6\*, 129.4, 129.1\*, 127.0\*, 126.5\*, 126.3<sup>#</sup>, 126.1<sup>#</sup>, 124.3<sup>#</sup>, 124.0\*, 116.2, 85.4\*, 85.3<sup>#</sup>, 60.5\*, 60.3<sup>#</sup>, 45.6\*, 44.4<sup>#</sup>, 41.7\*, 40.0<sup>#</sup>. IR (oil) mixture of diastereomers:  $\nu$  = 2980, 2252, 1715, 1602, 1463, 1450, 1396, 1371, 1253, 1147, 1094, 1050, 1018.

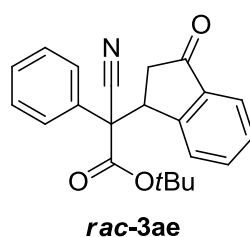

According to GP2 *tert*-butyl-2-cyano-2-phenylacetate **1a** (105.1 mg, 0.48 mmol, 1 equiv) was treated with 1*H*-inden-1-one **2e** (70.0 mg, 0.48 mmol, 1 equiv). Column chromatography (petrol ether:EtOAc = 9:1 → 4:1) of the crude product yielded **rac-3ae** (30.7 mg, 0.09 mmol, 18%) as a colorless oil with a *dr*<sub>a:b</sub> of 37:63. The major diastereomer (b) was isolated by column chromatography (CH<sub>2</sub>Cl<sub>2</sub> + 1% Et<sub>2</sub>O).

$C_{22}H_{21}NO_3$ , MW: 347.41 g mol<sup>-1</sup>. <sup>1</sup>H NMR (300 MHz, CDCl<sub>3</sub>, 21 °C) of the major diastereomer:  $\delta$  = 7.83 (*d*, *J* = 7.44, 1H, arom. *H*), 7.69-7.39 (*m*, 8H, arom. *H*), 4.70 (*dd*, *J* = 7.9, 3.5, 1H, *CH*), 2.58 (*dd*, *J* = 19.4, 7.7, 1H, *CH*<sub>2</sub>), 2.27 (*dd*, *J* = 19.4, 3.5, 1H, *CH*<sub>2</sub>), 1.47 (*s*, 9H, *CH*<sub>3</sub>). <sup>13</sup>C NMR (63 MHz, CDCl<sub>3</sub>, 21 °C) of the major diastereomer:  $\delta$  = 202.7, 166.3, 152.0, 138.0, 135.1, 133.8, 129.3, 126.3, 126.1, 124.3, 116.2, 85.3, 60.2, 44.3, 40.0, 27.6. IR (oil) of the major diastereomer:  $\nu$  = 2980, 2249, 1715, 1602, 1463, 1450, 1396, 1370, 1253, 1146, 1094, 1047, 1019. MS (ESI) *m/z*: 370.14 ([M+Na]<sup>+</sup>, 100%), 348.16 ([M+H]<sup>+</sup>, 4%). HRMS (ESI) *m/z*: Calc. for [M+Na]<sup>+</sup>: 370.1414. Found: 370.1429.

## Ethyl-2-cyano-2-(3-oxocyclohexyl)-2-phenylacetate (**3a'a**)

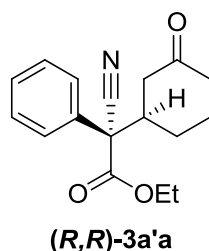

According to GP3 ethyl-2-cyano-2-phenylacetate (**1a'**, 20.0 mg, 0.11 mmol, 1 equiv) was treated with 2-cyclohexen-1-one **2a** (20.3 mg, 0.21 mmol, 2 equiv) in the presence of **FBIP-O<sub>2</sub>CC<sub>3</sub>F<sub>7</sub>** (1.82 mg, 1.10  $\mu$ mol, 1 mol%) to yield **(R,R)-3a'a** (31.0 mg, 0.11 mmol, 99%,  $ee_{(R,R)} = 77%$ ,  $ee_{(S,R)} = 15%$ ,  $dr_{(R,R+S,S):(S,R+R,S)} = 62:38$ ) as a colorless solid. The  $dr$  and  $ee$  values were determined by chiral column HPLC: Chiracel OD-H, *n*-hexane/*i*-PrOH (99/1), 2 mL min<sup>-1</sup>, detection at 210 nm,  $t_{(R,R)} = 10.7$  min,  $t_{(S,S)} = 12.8$  min. The major diastereomer was isolated by column chromatography (CH<sub>2</sub>Cl<sub>2</sub> + 1% Et<sub>2</sub>O).

**C<sub>17</sub>H<sub>19</sub>NO<sub>3</sub>**, MW: 285.34 g mol<sup>-1</sup>. Mp: 74.8-75.0 °C.  $[\alpha]_D^{20}$ : +58.2 (c = 0.10, CH<sub>2</sub>Cl<sub>2</sub>). **<sup>1</sup>H NMR (300 MHz, CDCl<sub>3</sub>, 21 °C) of the (R,R)/(S,S)-diastereomer:**  $\delta = 7.56-7.53$  (m, 2H, arom. H), 7.44-7.38 (m, 3H, arom. H), 4.35-4.15 (m, 2H, CH<sub>2</sub>CH<sub>3</sub>), 2.92-2.81 (m, 1H, CH), 2.45-2.39 (m, 1H, CH<sub>2</sub>), 2.37-2.26 (m, 1H, CH<sub>2</sub>), 2.22-2.05 (m, 3H, CH<sub>2</sub>), 1.93-1.65 (m, 3H, CH<sub>2</sub>), 1.26 (t,  $J = 7.2$ , 3H, CH<sub>3</sub>). **<sup>13</sup>C NMR (75 MHz, CDCl<sub>3</sub>, 21 °C) of the (R,R)/(S,S)-diastereomer:**  $\delta = 208.8, 166.9, 131.9, 129.4, 129.3, 126.2, 116.5, 63.5, 59.7, 45.1, 42.4, 40.9, 28.3, 24.2, 13.8$ . **IR (solid) of the (R,R)/(S,S)-diastereomer:**  $\nu = 3063, 2953, 2873, 2244, 1731, 1708, 1486, 1449, 1426, 1368, 1322, 1243, 1172, 1122, 1110, 1071, 1024, 1003$ .

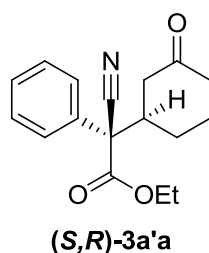

According to GP3 ethyl-2-cyano-2-phenylacetate (**1a'**, 19.8 mg, 0.10 mmol, 1 equiv) was treated with 2-cyclohexen-1-one **2a** (20.1 mg, 0.21 mmol, 2 equiv) in the presence of **FIP-O<sub>2</sub>CC<sub>3</sub>F<sub>7</sub>** (0.68 mg, 0.52  $\mu$ mol, 0.5 mol%) to yield **(S,R)-3a'a** (26.3 mg, 92  $\mu$ mol, 92%,  $ee_{(S,R)} = 83%$ ,  $ee_{(R,R)} = 13%$ ,  $dr_{(S,R+R,S):(R,R+S,S)} = 67:33$ ) as a colorless solid. The  $dr$  and  $ee$  values were determined by chiral column HPLC: Chiracel OD-H, *n*-hexane/*i*-PrOH (99/1), 2 mL min<sup>-1</sup>,

detection at 210 nm,  $t_{(S,R)} = 9.0$  min,  $t_{(R,S)} = 7.6$  min. The major diastereomer was isolated by column chromatography ( $\text{CH}_2\text{Cl}_2 + 1\% \text{Et}_2\text{O}$ ).

**C<sub>17</sub>H<sub>19</sub>NO<sub>3</sub>**, MW: 285.34 g mol<sup>-1</sup>. **Mp**: 71.5-71.7 °C. **[α]<sub>D</sub><sup>20</sup>**: +14.8 (c = 0.18, CH<sub>2</sub>Cl<sub>2</sub>). **<sup>1</sup>H NMR (300 MHz, CDCl<sub>3</sub>, 21 °C) of the (S,R)/(R,S)-diastereomer**: δ = 7.62-7.53 (m, 2H, arom. H), 7.47-7.37 (m, 3H, arom. H), 4.33-4.14 (m, 2H, CH<sub>2</sub>CH<sub>3</sub>), 2.92-2.81 (m, 1H, CH), 2.64-2.53 (m, 2H, CH<sub>2</sub>), 2.46-2.41 (m, 1H, CH<sub>2</sub>), 2.34-2.26 (m, 1H, CH<sub>2</sub>), 2.07-1.99 (m, 1H, CH<sub>2</sub>), 1.56-1.43 (m, 3H, CH<sub>2</sub>), 1.25 (t, J = 7.2, 3H, CH<sub>2</sub>CH<sub>3</sub>). **<sup>13</sup>C NMR (75 MHz, CDCl<sub>3</sub>, 21 °C) of the (S,R)/(R,S)-diastereomer**: δ = 208.4, 166.5, 132.6, 129.3, 129.2, 126.4, 126.1, 116.6, 63.5, 59.9, 45.4, 44.6, 40.8, 25.7, 24.0, 13.8. **IR (solid) of the (S,R)/(R,S)-diastereomer**: ν = 2963, 2877, 2246, 1741, 1709, 1491, 1448, 1366, 1321, 1276, 1226, 1161, 1068, 1029, 1001.

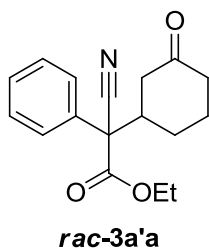

According to GP2 ethyl-2-cyano-2-phenylacetate (**1a'**, 261.3 mg, 1.38 mmol, 1 equiv) was treated with 2-cyclohexen-1-one **2a** (132.8 mg, 1.38 mmol, 1 equiv). Column chromatography (petrol ether:EtOAc = 9:1 → 4:1) of the crude product yielded **rac-3a'a** (364.0 mg, 1.28 mmol, 92%) as a colorless oil with a  $dr_{(R,R+S,S):(S,R+R,S)}$  of 36:64.

**C<sub>17</sub>H<sub>19</sub>NO<sub>3</sub>**, MW: 285.34 g mol<sup>-1</sup>. **HRMS (ESI) m/z**: Calc. for [C<sub>17</sub>H<sub>19</sub>NO<sub>3</sub> + Na]<sup>+</sup>: 308.1257. Found: 308.1250.



## ***tert*-Butyl-2-cyano-2-(3-hydroxycyclohexyl)-2-(4-methoxyphenyl)-acetate (6ma)**

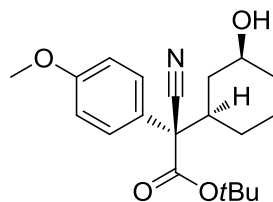

**(*S,R,S*)-6ma**

According to GP4 (*S,R*)-**3ma** (49.5 mg, 0.14 mmol, 1 equiv) was treated with NaBH<sub>4</sub> (11.5 mg, 0.31 mmol, 2.2 equiv) to yield (*S,R,S*)-**6ma** (48.4 mg, 0.31 mmol, quant.,  $ee_{(S,R,S)} = 89\%$ ,  $ee_{(R,R,S)} = 98\%$ ,  $dr_{(S,R,S+R,S,R):(R,R,S+S,S,R)} = 80:20$ ) as a colorless oil. After removal of the solvent under reduced pressure, the crude oily residue could be directly used for *dr*- and *ee*-determination by chiral stationary phase HPLC: Chiracel OD-H, *n*-hexane/*i*-PrOH (97/3), 1 mL min<sup>-1</sup>, detection at 210 nm,  $t_{(S,R,S)} = 27.7$  min,  $t_{(R,S,R)} = 18.8$  min. The minor diastereomer was only partially removed by column chromatography (PE : EtOAc = 4:1).

**C<sub>20</sub>H<sub>27</sub>NO<sub>4</sub>**, MW: 345.43 g mol<sup>-1</sup>. [ $\alpha$ ]<sub>D</sub><sup>20</sup>: -59.7 ( $c = 0.26$ , CH<sub>2</sub>Cl<sub>2</sub>). <sup>1</sup>H NMR (300 MHz, CDCl<sub>3</sub>, 21 °C) of the (*S,R,S*)/(*R,S,R*)-diastereomer [(*R,R,S*)/(*S,S,R*)-diastereomer]:  $\delta = 7.48$  (*d*,  $J = 8.7$ , 2H, arom. *H*), 6.91 (*d*,  $J = 9.2$ , 2H, arom. *H*), 3.82 (*s*, 3H, OCH<sub>3</sub>), 3.72-3.63 (*m*, 1H, CH), [3.54-3.45 (*m*, 1H, CH)], 2.43-2.34 (*m*, 1H, CH), 2.17-1.72 (*m*, 3H, CH<sub>2</sub>), 1.42 (*s*, 9H, CH<sub>3</sub>), 1.35-1.00 (*m*, 5H, CH<sub>2</sub>). <sup>13</sup>C NMR (75 MHz, CDCl<sub>3</sub>, 21 °C) of the (*S,R,S*)/(*R,S,R*)-diastereomer [(*R,R,S*)/(*S,S,R*)-diastereomer]:  $\delta = [166.5]$ , 166.4, [159.8], 159.7, 127.5, [125.5], 125.2, 117.5, 114.3, [114.2], [84.4], 84.3, 70.3, [70.2], 59.8, 55.3, 43.4, [38.8], 36.5, [35.2], 35.1, 28.5, 27.6, [26.1], [23.4], 23.2.

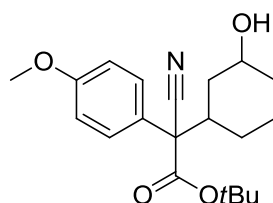

***rac*-6ma**

According to GP5 *rac*-**3ma** (22.9 mg, 67  $\mu$ mol, 1 equiv) was treated with NaBH<sub>4</sub> (5.51 mg, 0.15 mmol, 2.2 equiv). Column chromatography (petrol ether:EtOAc = 4:1  $\rightarrow$  2:1) of the crude product yielded *rac*-**6ma** (22.6 mg, 65  $\mu$ mol, 98%) as a colorless solid with a

$d_{r_{(R,R,S+S,S,R):(S,R,S+R,S,R)}}$  of 37:63. The  $(R,R,S)/(S,S,R)$ -diastereomers were isolated by column chromatography (PE : EtOAc = 4:1).

Constitution and relative configuration of the  $(S,R,S)/(R,S,R)$ -diastereomer of **rac-6ma** was confirmed by X-ray crystal structure analysis. The  $(S,R,S)/(R,S,R)$ -diastereomer of **rac-6ma** crystallized (from a racemic sample with both diastereomers) in *n*-hexane/*i*PrOH at room temperature. CCDC 856192 contains the supplementary crystallographic data for this compound. These data can be obtained free of charge from the Cambridge Crystallographic Data Centre via [www.ccdc.cam.ac.uk/data\\_request/cif](http://www.ccdc.cam.ac.uk/data_request/cif).

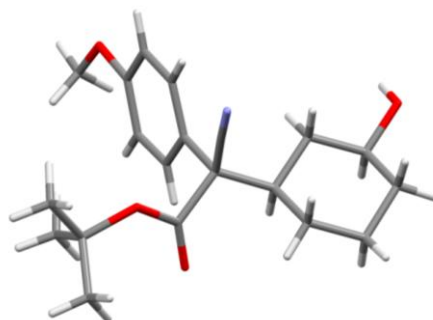

X-ray crystal structure of **rac-6ma** [color code: C (grey); N (blue); O (red); H (white)].

**C<sub>20</sub>H<sub>27</sub>NO<sub>4</sub>**, MW: 345.43 g mol<sup>-1</sup>. **Mp:** 133.5-134.1 °C. **<sup>1</sup>H NMR (300 MHz, CDCl<sub>3</sub>, 21 °C) of the  $(R,R,S)/(S,S,R)$ -diastereomer:**  $\delta$  = 7.48 (*d*, *J* = 9.2, 2H, arom. *H*), 6.92 (*d*, *J* = 9.2, 2H, arom. *H*), 3.82 (*s*, 3H, OCH<sub>3</sub>), 3.54-3.44 (*m*, 1H, CH), 2.44-2.32 (*m*, 1H, CH), 2.01-1.78 (*m*, 3H, CH<sub>2</sub>), 1.51-1.35 (*m*, 2H, CH<sub>2</sub>), 1.42 (*s*, 9H, CH<sub>3</sub>), 1.27-1.14 (*m*, 2H, CH<sub>2</sub>), 1.12-1.00 (*m*, 1H, CH<sub>2</sub>). **<sup>13</sup>C NMR (75 MHz, CDCl<sub>3</sub>, 21 °C) of the  $(R,R,S)/(S,S,R)$ -diastereomer:**  $\delta$  = 166.5, 159.8, 127.6, 125.2, 117.4, 114.3, 114.2, 84.3, 70.3, 59.8, 55.3, 43.5, 36.5, 35.1, 28.5, 27.6, 23.4. **IR (in CDCl<sub>3</sub>):**  $\nu$  = 3368, 2936, 2859, 2251, 1733, 1608, 1582, 1510, 1456, 1394, 1297, 1251, 1185, 1153, 1033. **MS (ESI) *m/z*:** 368.18 ([M+Na]<sup>+</sup>, 100%), 346.20 ([M+H]<sup>+</sup>, 1%), 312.12 ([M - *t*Bu+Na+H]<sup>+</sup>, 46%). **HRMS (ESI) *m/z*:** Calc. for [M+Na]<sup>+</sup>: 368.1832. Found: 368.1837.

## Recycling of the Catalyst

### Experimental

The activated catalyst (3.0 mg, 0.18  $\mu\text{mol}$ , 2 mol%) was dissolved in  $\text{Et}_2\text{O}$  and silica (40-63  $\mu\text{m}$ , 1g silica per 25 mg catalyst, silica was washed with diglyme and  $\text{Et}_2\text{O}$  prior to use) was added. The solvent was removed by a constant stream of nitrogen to give the absorbed catalyst. This red solid was used in the catalysis as follows:

*tert*-Butyl-2-cyano-2-phenylacetate (**1a**, 20 mg, 0.09 mmol, 1 equiv) was dissolved in diglyme (150  $\mu\text{L}$ ) and HOAc in diglyme (20  $\mu\text{L}$ , 0.02 mmol, 0.20 equiv,  $c = 47.7 \text{ mmol L}^{-1}$ ), cyclohex-2-en-1-one (**2a**, 18  $\mu\text{L}$ , 0.18 mmol, 2 equiv) and the activated catalyst on silica were added. The red-wine-colored reaction mixture was stirred for 24 hours at 35 °C. The reaction was quenched with *n*-pentane (1 mL) and the catalyst precipitated on silica. The colorless solution was separated by decantation and the solid residue was additionally washed with *n*-pentane. Solvent evaporation of the combined supernatant resulted in the product (23.4-28.5 mg, 0.07-0.09 mmol, 81-99%). The absorbed catalyst was dried in vacuum and used for catalysis as described above.

| Run                             | Conv. <sup>a</sup><br>[%] | <i>dr</i> <sup>a</sup><br>( <i>R,R+S,S</i> ):( <i>S,R+R,S</i> ) | <i>ee</i> <sup>b</sup><br>( <i>R,R</i> ) [%] |
|---------------------------------|---------------------------|-----------------------------------------------------------------|----------------------------------------------|
| 1                               | 99                        | 89:11                                                           | 94                                           |
| 2                               | 95                        | 89:11                                                           | 95                                           |
| 3                               | 96                        | 89:11                                                           | 95                                           |
| 4                               | 94                        | 89:11                                                           | 93                                           |
| 5                               | 88                        | 87:13                                                           | 93                                           |
| 6 <sup>c</sup>                  | 81                        | 82:12                                                           | 84                                           |
| control experiment <sup>d</sup> | 5                         | 63:37                                                           | <1                                           |

<sup>a</sup> Determined by  $^1\text{H-NMR}$ . <sup>b</sup> Determined by HPLC. <sup>c</sup> Reaction time 48 h. <sup>d</sup> Reaction was run with silica, without catalyst.

## Derivatization of Enantioenriched Michael-Addition Products (*R,R*)-3 from FBIP Catalysis

### (*R*)-*tert*-Butyl-2-cyano-2-((*R*)-2-oxooxepan-4-yl)-2-phenylacetate (**4aa**)

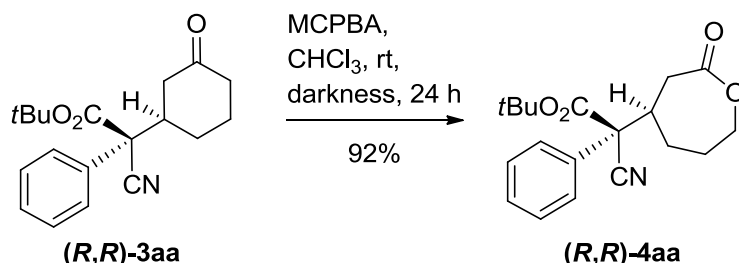

(*R,R*)-**3aa** (208.0 mg, 0.66 mmol,  $ee_{(R,R)} = 94\%$ ) was dissolved in chloroform (15 mL) and *m*-chloroperbenzoic acid (MCPBA, 212.5 mg, 0.86 mmol, 1.3 equiv) was added. The reaction was stirred for 24 h in the darkness. Afterwards the reaction mixture was diluted with chloroform (10 mL) and the organic layer was washed with aq.  $\text{NaHCO}_3$  (~10%, 1 x 10 mL) and brine (1 x 10 mL). The organic phase was dried over  $\text{Na}_2\text{SO}_4$ , filtrated and the solvent removed. Column chromatography of the crude product (PE:EtOAc = 9:1 → 4:1) resulted in (*R,R*)-**4aa** (200 mg, 0.61 mmol, 92%) as a colorless solid.

$\text{C}_{19}\text{H}_{23}\text{NO}_4$ , MW: 329.39 g mol<sup>-1</sup>. Mp: 59.9-62.0 °C.  $[\alpha]_{\text{D}}^{20}$ : +18.3 ( $c = 0.07$ ,  $\text{CH}_2\text{Cl}_2$ ). <sup>1</sup>H NMR (300 MHz,  $\text{CDCl}_3$ , 21 °C):  $\delta = 7.57\text{-}7.54$  (*m*, 2H, arom. *H*), 7.46-7.39 (*m*, 3H, arom. *H*), 4.35-4.18 (*m*, 2H,  $\text{CH}_2\text{O}$ ), 2.99-2.91 (*m*, 1H,  $\text{CH}_2$ ), 2.81-2.75 (*m*, 1H, *CH*), 2.71-2.57 (*m*, 1H,  $\text{CH}_2$ ), 2.29-2.13 (*m*, 1H,  $\text{CH}_2$ ), 1.99-1.90 (*m*, 1H,  $\text{CH}_2$ ), 1.79-1.64 (*m*, 1H,  $\text{CH}_2$ ), 1.46 (*s*, 9H,  $\text{CH}_3$ ), 1.44-1.38 (*m*, 1H,  $\text{CH}_2$ ). <sup>13</sup>C NMR (75 MHz,  $\text{CDCl}_3$ , 21 °C):  $\delta = 172.6, 165.2, 132.8, 129.5, 129.4, 129.2, 126.1, 116.4, 85.5, 68.7, 61.4, 41.0, 38.2, 30.0, 28.2, 27.5$ . IR (solid):  $\nu = 2979, 2937, 2324, 1729, 1477, 1449, 1394, 1369, 1284, 1242, 1206, 1148, 1076, 1031$ . MS (ESI) *m/z*: 352.15 ( $[\text{M}+\text{Na}]^+$ , 100%), 295.09 ( $[\text{M}+\text{Na} - t\text{Bu}]^+$ , 23%), 273.11 ( $[\text{M}+\text{H} - t\text{Bu}]^+$ , 59%). HRMS (ESI) *m/z*: Calc. for  $[\text{M}+\text{Na}]^+$ : 352.1519. Found: 352.1525.

## **(R,R)-tert-Butyl-2-(4-bromophenyl)-2-cyano-2-((R)-2-oxooxepan-4-yl)-acetate (4ia)**

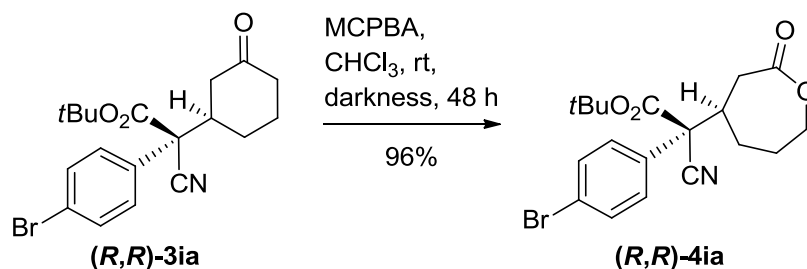

**(R,R)-3ia** (49.6 mg, 0.13 mmol,  $ee_{(R,R)} = 90\%$ ) was dissolved in chloroform (1.5 mL) and *m*-chloroperbenzoic acid (MCPBA, 28.4 mg, 0.17 mmol, 1.3 equiv) was added. The reaction was stirred for 48 h in the darkness. Afterwards the reaction mixture was diluted with chloroform (10 mL) and the organic layer was washed with aq. NaHCO<sub>3</sub> (~10%, 1 x 10 mL) and brine (1 x 10 mL). The organic phase was dried over Na<sub>2</sub>SO<sub>4</sub>, filtrated and the solvent removed. Column chromatography of the crude product (PE:EtOAc = 9:1 → 4:1) resulted in **(R,R)-4ia** (94.3 mg, 0.12 mmol, 96%) as a colorless solid.

Constitution and the absolute configuration of **(R,R)-4ia** was confirmed by X-ray crystal structure analysis. **(R,R)-4ia** crystallized in enantiomerically pure form in *n*-hexane/*i*PrOH at room temperature. CCDC 856191 contains the supplementary crystallographic data for this compound. These data can be obtained free of charge from the Cambridge Crystallographic Data Centre via [www.ccdc.cam.ac.uk/data\\_request/cif](http://www.ccdc.cam.ac.uk/data_request/cif).

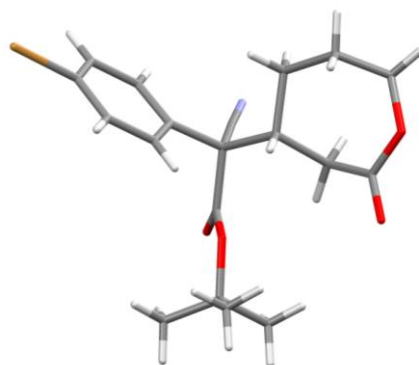

X-ray crystal structure of **(R,R)-4ia** [color code: C (grey); Br (brown); N (blue); O (red); H (white)].

**C<sub>19</sub>H<sub>22</sub>NO<sub>4</sub>Br**, MW: 408.29 g mol<sup>-1</sup>. **Mp**: 128.5-129.0 °C.  $[\alpha]_D^{20}$ : +37.9 (c = 0.25, CH<sub>2</sub>Cl<sub>2</sub>). **<sup>1</sup>H NMR (300 MHz, CDCl<sub>3</sub>, 21 °C)**:  $\delta$  = 7.57 (*d*, *J* = 8.8, 2H, arom. *H*), 7.45 (*d*, *J* = 8.8, 2H, arom. *H*), 4.35-4.18 (*m*, 2H, CH<sub>2</sub>O), 2.98-2.90 (*m*, 1H, CH<sub>2</sub>), 2.77-2.74 (*m*, 1H, CH), 2.68-2.64 (*m*, 1H, CH<sub>2</sub>), 2.00-1.92 (*m*, 1H, CH<sub>2</sub>), 1.79-1.64 (*m*, 2H, CH<sub>2</sub>), 1.47 (*s*, 9H, CH<sub>3</sub>), 1.30-1.22 (*m*, 1H,

$\text{CH}_2$ ).  $^{13}\text{C}$  NMR (75 MHz,  $\text{CDCl}_3$ , 21 °C):  $\delta = 172.4, 164.8, 132.6, 131.9, 127.9, 123.6, 116.0, 86.0, 68.6, 61.0, 41.1, 38.1, 30.0, 28.2, 27.5, 26.9$ . IR (solid):  $\nu = 2980, 2935, 1727, 1486, 1455, 1396, 1369, 1285, 1260, 1240, 1154, 1077, 1009$ . MS (ESI)  $m/z$ : 430.06 ( $[\text{M}+\text{Na}]^+$ , 100%), 425.11 ( $[\text{M}+\text{NH}_4]^+$ , 8%). HRMS (ESI)  $m/z$ : Calc. for  $[\text{M}+\text{Na}]^+$ : 430.0624. Found: 430.0631; Calc. for  $[\text{M}+\text{NH}_4]^+$ : 425.1070. Found: 425.1076.

### (2*R*,3*R*)-*tert*-Butyl-2-cyano-3-(3-hydroxypropyl)-5-oxo-2-phenylheptanoate (5)

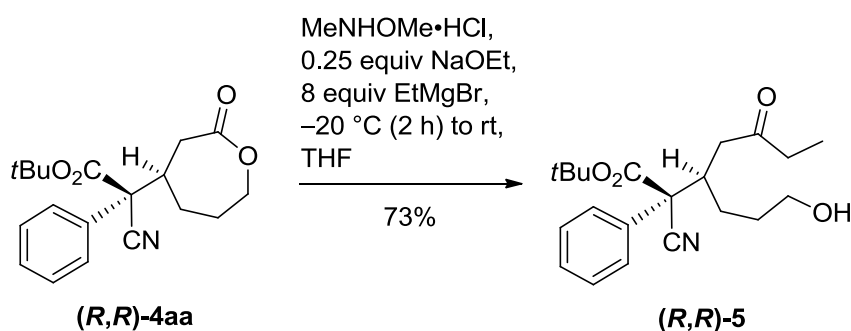

**(*R,R*)-4aa** (120.7 mg, 0.37 mmol), *N,O*-dimethylhydroxylamine hydrochloride (42.9 mg, 0.44 mmol, 1.2 equiv), and sodium ethoxide (6.2 mg, 92  $\mu\text{mol}$ , 0.25 equiv) were dissolved in dry THF (5 mL) and the solution was cooled to  $-20\text{ }^\circ\text{C}$ . A solution of the Grignard reagent (freshly prepared from magnesium (71.3 mg, 2.93 mmol, 8 equiv), ethylbromide (218.8  $\mu\text{L}$ , 2.93 mmol, 8 equiv) and THF (2.5 mL)) was added and the reaction was stirred for 2 h. Afterwards it was allowed to warm to room temperature and stirred overnight. The reaction was carefully quenched by adding water and acidified with 1N HCl and stirred for additional 2 h. Water was added and the solution was extracted three times with  $\text{CH}_2\text{Cl}_2$ . The combined organic layer was dried over  $\text{MgSO}_4$ , filtrated and concentrated *in vacuo* to give the crude product. Column chromatography (PE:EtOAc = 9:1  $\rightarrow$  4:1) resulted in **(*R,R*)-5** (95.6 mg, 0.27 mmol, 73%) as a colorless oil.

$\text{C}_{21}\text{H}_{29}\text{NO}_4$ , MW: 359.46  $\text{g mol}^{-1}$ .  $[\alpha]_{\text{D}}^{20}$ :  $-19.4$  ( $c = 0.34$ ,  $\text{CH}_2\text{Cl}_2$ ).  $^1\text{H}$  NMR (300 MHz,  $\text{CDCl}_3$ , 21 °C):  $\delta = 7.60\text{--}7.56$  (*m*, 2H, arom. *H*), 7.43–7.36 (*m*, 3H, arom. *H*), 3.50–3.36 (*m*, 2H,  $\text{CH}_2\text{OH}$ ), 3.34–3.24 (*m*, 1H, *CH*), 2.75–2.60 (*m*, 2H,  $\text{CH}_2$ ), 2.48 (*q*,  $J = 7.5$ , 2H,  $\text{CH}_2$ ), 1.38 (*s*, 9H,  $\text{CH}_3$ ), 1.32–1.16 (*m*, 3H,  $\text{CH}_2$ ), 1.09 (*t*,  $J = 7.4$ , 3H,  $\text{CH}_2$ ).  $^{13}\text{C}$  NMR (75 MHz,  $\text{CDCl}_3$ , 21 °C):  $\delta = 208.7, 166.1, 133.6, 129.1, 129.0, 126.4, 117.7, 84.6, 62.3, 61.0, 45.8, 38.9, 36.3, 29.8, 27.8, 27.5, 7.9$ . IR (in  $\text{CDCl}_3$ ):  $\nu = 3443, 2977, 2938, 1733, 1637, 1493, 1450, 1415, 1395, 1370, 1251, 1150, 1036$ . MS (ESI)  $m/z$ : 382.20 ( $[\text{M}+\text{Na}]^+$ , 100%), 360.22 ( $[\text{M}+\text{H}]^+$ , 5%), 326.14

$([M - tBu + Na + H]^+, 74\%)$ ,  $304.15$  ( $[M - tBu + 2H]^+, 34\%)$ ,  $286.14$  ( $[M - tBu - OH + H]^+, 17\%)$ .

**HRMS (ESI)  $m/z$ :** Calc. for  $[M + Na]^+$ : 382.1989. Found: 382.1987.

**(*R*)-*tert*-Butyl-2-cyano-2-((1*R*,3*S*)-3-hydroxycyclohexyl)-2-phenyl-  
acetate ((*R,R,S*)-**6aa**)**

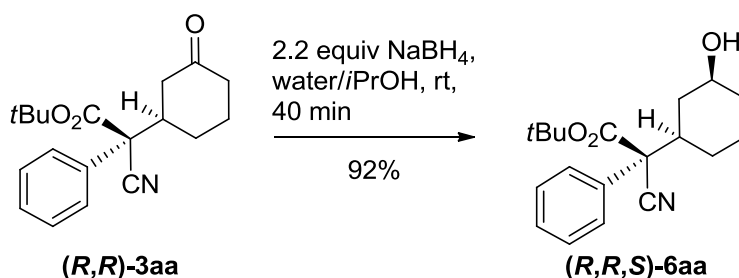

According to GP5 (**(*R,R*)-3aa** (486.5 mg, 1.55 mmol, 1 equiv,  $ee_{(R,R)} = 94\%$ ) was treated with NaBH<sub>4</sub> (129.2 mg, 3.52 mmol, 2.2 equiv) to yield (**(*R,R,S*)-6aa** (446.1 mg, 1.42 mmol, 92%) as a colorless solid.

Constitution and relative configuration of **6aa** were confirmed by X-ray crystal structure analysis. The (*R,R,S*)/(*S,S,R*)-configured diastereomer **6aa** crystallized in racemic form in *n*-hexane/*i*PrOH at room temperature. CCDC 856196 contains the supplementary crystallographic data for this compound. These data can be obtained free of charge from the Cambridge Crystallographic Data Centre via [www.ccdc.cam.ac.uk/data\\_request/cif](http://www.ccdc.cam.ac.uk/data_request/cif).

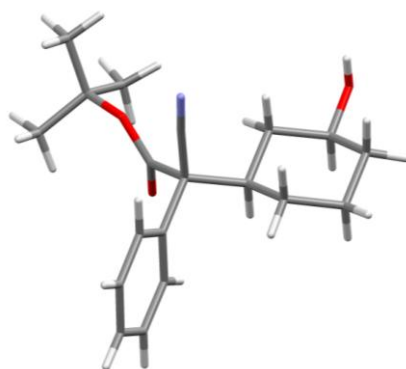

X-ray crystal structure of **6aa** [color code: C (grey); N (blue); O (red); H (white)].

**C<sub>19</sub>H<sub>25</sub>NO<sub>3</sub>**, MW: 315.41 g mol<sup>-1</sup>. **Mp**: 125.1-125.3 °C.  $[\alpha]_D^{20}$ : -3.7 ( $c = 0.47$ , CH<sub>2</sub>Cl<sub>2</sub>). **<sup>1</sup>H NMR (300 MHz, CDCl<sub>3</sub>, 21 °C)**:  $\delta = 7.59-7.55$  (*m*, 2H, *arom. H*),  $7.43-7.35$  (*m*, 3H, *arom. H*),  $3.75-3.65$  (*m*, 1H, *CHOH*),  $2.44$  (*tt*,  $J = 12.0, 3.3$ , 1H, *CH*),  $2.18-2.14$  (*m*, 1H, *CH<sub>2</sub>*),  $2.01-1.99$  (*m*, 1H, *CH<sub>2</sub>*),  $1.76-1.71$  (*m*, 1H, *CH<sub>2</sub>*),  $1.42$  (*s*, 9H, *CH<sub>3</sub>*),  $1.29-0.86$  (*m*, 5H, *CH<sub>2</sub>*). **<sup>13</sup>C NMR (75 MHz, CDCl<sub>3</sub>, 21 °C)**:  $\delta = 166.1, 133.6, 129.3, 129.0, 128.98, 128.7, 126.3, 117.3, 84.5,$

70.1, 60.5, 60.4, 43.4, 38.8, 36.5, 35.2, 27.6, 26.1, 23.4, 23.2, 21.1. **IR (solid):**  $\nu = 3346, 2937, 2860, 2246, 1734, 1449, 1370, 1250, 1149, 1047, 1032$ . **MS (ESI)  $m/z$ :** 338.17 ( $[M+Na]^+$ , 100%), 316.19 ( $[M+H]^+$ , 8%), 282.11 ( $[m+H-tBu]^+$ , 16%), 259.17 ( $[M+H-tBu]^+$ , 22%). **HRMS (ESI)  $m/z$ :** Calc. for  $[M+Na]^+$ : 338.1727. Found: 338.1729.

### **(R)-tert-Butyl-3-amino-2-((1R,3S)-3-hydroxycyclohexyl)-3-oxo-2-phenylpropanoate ((R,R,S)-7)**

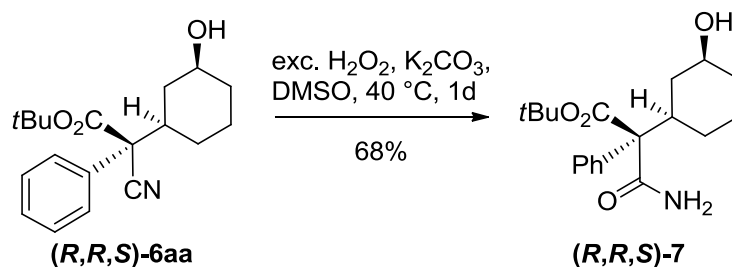

**(R,R,S)-6aa** (209.4 mg, 0.66 mmol) was dissolved in DMSO (13 mL) and  $\text{K}_2\text{CO}_3$  (45.9 mg, 0.33 mmol, 0.5 equiv) was added at RT. The mixture was heated to 45 °C under very fast stirring (fast stirring of the reaction using a large magnetic stirring bar is essential to avoid precipitation of the starting material). Aq.  $\text{H}_2\text{O}_2$  (33.3 mL, 332.0 mmol, 500 equiv, 35%, 25 equiv/h) and aq.  $\text{K}_2\text{CO}_3$  solution (458.8 mg, 3.32 mmol, 5 equiv, 0.25 equiv/h) were added *via* a syringe pump overnight (20 h). Afterwards the reaction mixture was cooled to RT, acidified with aq. HCl (1M), saturated with NaCl and extracted with EtOAc (4 x 25 mL). The solvent of the combined organic layer was removed and the residue dissolved in diethyl ether and extracted with brine (3 times) to remove dimethylsulfone. The combined organic phase was dried over  $\text{MgSO}_4$ , filtrated and concentrated *in vacuo*. Column chromatography of the crude product ( $\text{CH}_2\text{Cl}_2 + 2.5\% \text{MeOH} \rightarrow \text{CH}_2\text{Cl}_2 + 5\% \text{MeOH}$ ) resulted in **(R,R,S)-7** (150.3 mg, 0.45 mmol, 68 %) as a colorless solid.

**C<sub>19</sub>H<sub>27</sub>NO<sub>4</sub>**, MW: 333.42 g mol<sup>-1</sup>. **Mp:** 108.0-108.6 °C. **[ $\alpha$ ]<sub>D</sub><sup>20</sup>:** -1.8 (c = 0.11,  $\text{CH}_2\text{Cl}_2$ ). **<sup>1</sup>H NMR (300 MHz,  $\text{CDCl}_3$ , 21 °C):**  $\delta = 7.35\text{-}7.28$  (m, 5H, arom. H), 6.98 (b, 1H,  $\text{NH}_2$ ), 5.62 (b, 1H,  $\text{NH}_2$ ), 3.74-3.63 (m, 1H,  $\text{CHOH}$ ), 2.76 (tt,  $J = 12.1, 2.4$ , 1H, CH), 2.06-1.94 (m, 1H,  $\text{CH}_2$ ), 1.82-1.56 (m, 3H,  $\text{CH}_2$ ), 1.47 (s, 9H,  $\text{CH}_3$ ), 1.42-1.26 (m, 1H,  $\text{CH}_2$ ), 1.11-0.86 (m, 3H,  $\text{CH}_2$ ). **<sup>13</sup>C NMR (75 MHz,  $\text{CDCl}_3$ , 21 °C):**  $\delta = 172.4, 171.6, 137.3, 128.7, 128.0, 127.3, 83.0, 71.1, 67.5, 40.6, 38.4, 35.6, 27.8, 24.1$ . **IR (solid):**  $\nu = 3344, 2934, 2858, 1670, 1581, 1447, 1367, 1245, 1152, 1045, 840$ . **MS (ESI)  $m/z$ :** 356.16 ( $[M+Na]^+$ , 100%), 334.20 ( $[M+H]^+$ , 15%), 279.14 ( $[M-C_6H_5]^+$ , 29%). **HRMS (ESI)  $m/z$ :** Calc. for  $[M+Na]^+$ : 356.1832. Found: 356.1834.



**(S)-tert-Butyl-2-((tert-butoxycarbonyl)amino)-2-((1R,3S)-3-hydroxycyclohexyl)-2-phenylacetate ((S,R,S)-8)**

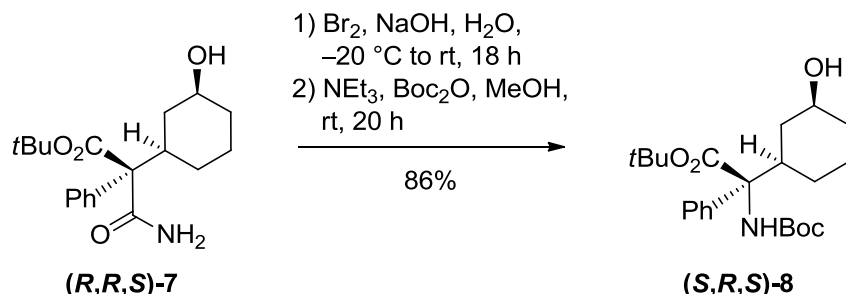

**(R,R,S)-7** (92.1 mg, 0.28 mmol) was cooled to -20 °C and sodium hypobromite solution (freshly prepared from bromine (17.0 µL, 0.33 mmol, 1.2 equiv), NaOH (66.3 mg, 1.66 mmol, 6 equiv) and water (2 mL)) was added slowly. The reaction mixture was allowed to warm to room temperature and stirred overnight. Sodium sulfite (~45 mg) was added and the mixture was acidified to pH = 2 with aq. HCl (1M) and stirred for 15 min. Afterwards the mixture was neutralized with sat. aq. NaHCO<sub>3</sub>, brine was added and the mixture was extracted with CH<sub>2</sub>Cl<sub>2</sub> (3 x 25 mL). The combined organic phase was dried over Na<sub>2</sub>SO<sub>4</sub>, filtrated and concentrated *in vacuo* to give the unprotected aminoester. **C<sub>18</sub>H<sub>27</sub>NO<sub>3</sub>**, MW: 305.41 g mol<sup>-1</sup>. **<sup>1</sup>H NMR (300 MHz, CDCl<sub>3</sub>, 21 °C):** δ = 7.57-7.52 (m, 2H, arom. H), 7.38-7.29 (m, 3H, arom. H), 3.73-3.62 (m, 1H, CHOH), 2.39 (tt, J = 11.8, 3.1, 1H, CH), 1.96-1.92 (m, 2H, CH<sub>2</sub>), 1.72-1.66 (m, 1H, CH<sub>2</sub>), 1.58-1.52 (m, 1H, CH<sub>2</sub>), 1.45 (s, 9H, CH<sub>3</sub>), 1.38-1.24 (m, 1H, CH<sub>2</sub>), 1.22-1.13 (m, 1H, CH<sub>2</sub>), 1.09-1.04 (m, 1H, CH<sub>2</sub>), 0.98-0.84 (m, 1H, CH<sub>2</sub>). **<sup>13</sup>C NMR (75 MHz, CDCl<sub>3</sub>, 21 °C):** δ = 170.0, 138.0, 128.4, 128.0, 127.9, 125.8, 84.2, 70.5, 44.6, 37.6, 35.5, 27.7, 25.4, 23.3.

The residue was dissolved in MeOH (1 mL), Et<sub>3</sub>N (115 µL, 0.83 mmol, 3 equiv) and Boc<sub>2</sub>O (301 mg, 1.38 mmol, 5 equiv) was added and the reaction was stirred overnight.<sup>9</sup> Solvent was removed *in vacuo*, the residue was dissolved in ethyl acetate and the solution washed once with aq. NaHCO<sub>3</sub> (5%) and twice with brine. Then it was dried over Na<sub>2</sub>SO<sub>4</sub>, filtrated and the solvent was removed *in vacuo* to give the crude product. Column chromatography (PE:EtOAc = 18:1 → 9:1) resulted in **(S,R,S)-8** (96.7 mg, 0.24 mmol, 86%) as a colorless oil.

**C<sub>23</sub>H<sub>35</sub>NO<sub>5</sub>**, MW: 405.53 g mol<sup>-1</sup>. [α]<sub>D</sub><sup>20</sup>: -12.3 (c = 0.17, CH<sub>2</sub>Cl<sub>2</sub>). **<sup>1</sup>H NMR (300 MHz, CDCl<sub>3</sub>, 21 °C):** δ = 7.56-7.52 (m, 2H, arom. H), 7.39-7.29 (m, 3H, arom. H), 4.56-4.45 (m, 1H, CHOH), 2.60-2.41 (m, 1H, CH), 2.10-2.06 (m, 1H, CH<sub>2</sub>), 1.94-1.88 (m, 1H, CH<sub>2</sub>), 1.65-1.59 (m, 1H, CH<sub>2</sub>), 1.55 (m, 1H, CH<sub>2</sub>), 1.43 (s, 9H, CH<sub>3</sub>), 1.42 (s, 9H, CH<sub>3</sub>), 1.35-1.11 (m, 4H, CH<sub>2</sub>). **<sup>13</sup>C**

**NMR (75 MHz, CDCl<sub>3</sub>, 21 °C):**  $\delta$  = 169.9, 152.6, 137.2, 128.5, 128.1, 125.7, 84.3, 81.9, 44.5, 32.1, 31.6, 30.7, 27.7, 26.9, 23.1. **IR (in CDCl<sub>3</sub>):**  $\nu$  = 2970, 2938, 2853, 2239, 1732, 1448, 1355, 1310, 1277, 1250, 1148, 1098. **MS (ESI)  $m/z$ :** 406.22 ([M+H]<sup>+</sup>, 100%), 349.16 ([M - *t*Bu+H]<sup>+</sup>, 20%), 272.11 ([M - *t*Bu - Ph+H]<sup>+</sup>, 15%). **HRMS (ESI)  $m/z$ :** Calc. for [M+H]<sup>+</sup>: 406.2588. Found: 406.2590.

### **(*R*)-*tert*-Butyl-2-cyano-2-((1*R*,3*S*)-3-methoxycyclohexyl)-2-phenylacetate**

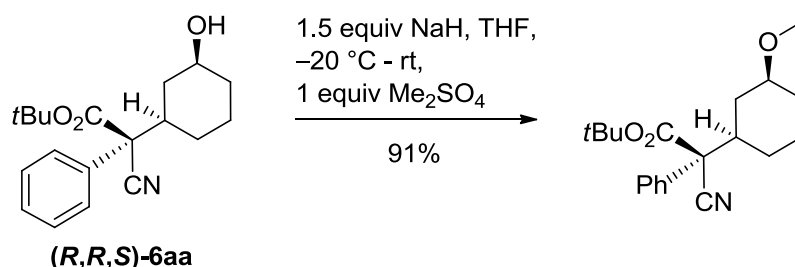

A solution of (*R,R,S*)-6aa (367.4 mg, 1.17 mmol) in dry THF (8 mL) was slowly added to a NaH (76 mg, 1.75 mmol, 1.5 equiv, 55-60% in oil) suspension in THF (2 mL) at -20 °C. The reaction was allowed to warm to room temperature and stirred for additional 30 min. Afterwards dimethylsulfate (137  $\mu$ L, 1.28 mmol, 1.1 equiv) was added in one portion at -20 °C, the reaction was allowed to warm to room temperature and stirred for 30 min for complete conversion.<sup>10</sup> Saturated aq. NH<sub>4</sub>Cl was added carefully, the mixture was acidified with HCl (1M) and extracted three times with Et<sub>2</sub>O. The combined organic layer was dried over Na<sub>2</sub>SO<sub>4</sub>, filtrated and the solvent removed *in vacuo*. Column chromatography of the crude product (PE:EtOAc = 18:1) resulted in (*R*)-*tert*-Butyl-2-cyano-2-((1*R*,3*S*)-3-methoxycyclohexyl)-2-phenylacetate (349.2 mg, 1.06 mmol, 91%) as a colorless oil.

**C<sub>20</sub>H<sub>27</sub>NO<sub>3</sub>, MW:** 329.43 g mol<sup>-1</sup>. [ $\alpha$ ]<sub>D</sub><sup>20</sup>: -11.8 (c = 0.11, CH<sub>2</sub>Cl<sub>2</sub>). **<sup>1</sup>H NMR (300 MHz, CDCl<sub>3</sub>, 21 °C):**  $\delta$  = 7.59-7.55 (m, 2H, arom. H), 7.43-7.35 (m, 3H, arom. H), 3.20 (s, 3H, CHOCH<sub>3</sub>), 3.09-2.99 (m, 1H, CHOCH<sub>3</sub>), 2.45-2.35 (m, 1H, CH), 2.12-2.07 (m, 1H, CH<sub>2</sub>), 1.93-1.77 (m, 3H, CH<sub>2</sub>), 1.55-0.97 (m, 4H, CH<sub>2</sub>), 1.42 (s, 9H, CH<sub>3</sub>). **<sup>13</sup>C NMR (75 MHz, CDCl<sub>3</sub>, 21 °C):**  $\delta$  = 153.0, 139.7, 128.9, 127.8, 125.8, 122.1, 82.1, 75.5, 46.8, 45.9, 33.6, 31.3, 27.8, 27.6, 27.4, 26.9, 24.8, 23.1. **IR (oil):**  $\nu$  = 2940, 2863, 2239, 1733, 1601, 1494, 1453, 1393, 1368, 1316, 1276, 1251, 1154, 1089, 1036, 982. **MS (ESI)  $m/z$ :** 352.19 ([M+Na]<sup>+</sup>, 100%), 338.17 ([M -

$\text{CH}_3+\text{Na}+\text{H}]^+$ , 20%), 282.11 ( $[\text{M} - \text{COOtBu}]^+$ , 9%). **HRMS (ESI)  $m/z$ :** Calc. for  $[\text{M}+\text{Na}]^+$ : 352.1883. Found: 352.1873.

**(*R*)-2-cyano-2-((1*R*,3*S*)-3-methoxycyclohexyl)-2-phenylacetamide  
(*(R,R,S)*-9)**

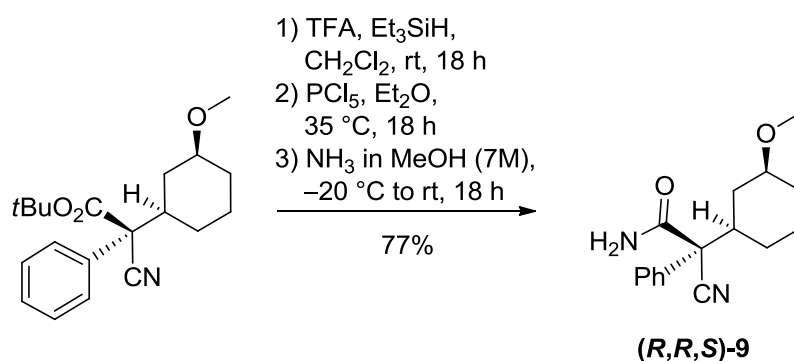

1) Hydrolysis of the ester:<sup>11</sup> To a solution of (*R*)-*tert*-Butyl-2-cyano-2-((1*R*,3*S*)-3-methoxycyclohexyl)-2-phenylacetate (105.9 mg, 0.32 mmol) in dry CH<sub>2</sub>Cl<sub>2</sub> (1 mL) was added trifluoroacetic acid (476 μL, 4.18 mmol, 13 equiv) and triethylsilane (130 μL, 0.80 mmol, 2.5 equiv) at room temperature and the reaction mixture was stirred overnight. The solvent was removed *in vacuo* and *n*-pentane (~5 mL) was added to precipitate the acid, which was isolated by decantation of the residual liquid and dried in high vacuum.

2) Formation of the acid chloride:<sup>12</sup> To the acid was added dry Et<sub>2</sub>O (4 mL) and PCl<sub>5</sub> (72 mg, 0.34 mmol, 1.05 equiv). The mixture was stirred overnight at room temperature.

3) Formation of the amide:<sup>12</sup> The acid chloride solution was slowly added to a NH<sub>3</sub> solution in MeOH (7M, 4 mL) at -20 °C. After 1 h the reaction was warmed to room temperature and stirred overnight. The solvent was removed, water was added and the mixture was washed three times with Et<sub>2</sub>O. The combined organic phase was dried over Na<sub>2</sub>SO<sub>4</sub>, filtrated and the solvent was removed *in vacuo* to give the crude product. Column chromatography (PE:EtOAc = 2:1) resulted in (*R,R,S*)-9 (67.5 mg, 0.25 mmol, 77%) as a colorless solid.

**C<sub>16</sub>H<sub>20</sub>N<sub>2</sub>O<sub>2</sub>**, MW: 272.34 g mol<sup>-1</sup>. **Mp:** 111.9-112.4 °C. **[α]<sub>D</sub><sup>20</sup>:** -19.2 (c = 0.05, CH<sub>2</sub>Cl<sub>2</sub>). **<sup>1</sup>H NMR (300 MHz, CDCl<sub>3</sub>, 21 °C):** δ = 7.64-7.60 (*m*, 2H, *arom. H*), 7.43-7.36 (*m*, 3H, *arom. H*), 6.32 (*b*, 1H, NH<sub>2</sub>), 5.72 (*b*, 1H, NH<sub>2</sub>), 3.21 (*s*, 3H, CHOCH<sub>3</sub>), 3.09-2.99 (*m*, 1H, CHOCH<sub>3</sub>), 2.58-2.49 (*m*, 1H, CH), 2.13-2.08 (*m*, 1H, CH<sub>2</sub>), 1.92-1.88 (*m*, 2H, CH<sub>2</sub>), 1.55-1.50 (*m*, 1H, CH<sub>2</sub>), 1.44-1.26 (*m*, 2H, CH<sub>2</sub>), 1.17-0.94 (*m*, 2H, CH<sub>2</sub>). **<sup>13</sup>C NMR (75 MHz, CDCl<sub>3</sub>, 21 °C):** δ =

167.9, 133.4, 129.1, 128.9, 126.3, 119.0, 78.7, 59.6, 55.6, 43.0, 33.3, 31.1, 28.9, 23.2. **IR (in CDCl<sub>3</sub>):**  $\nu$  = 3336, 3193, 2938, 2826, 2242, 1693, 1607, 1494, 1449, 1352, 1277, 1198, 1147, 1089, 1036, 992. **MS (ESI)  $m/z$ :** 295.14 ([M+Na]<sup>+</sup>, 100%), 273.16 ([M+H]<sup>+</sup>, 2%), 241.13 ([M – OCH<sub>3</sub>]<sup>+</sup>, 13%), 160.07 ([M – 3-methoxycyclohexyl+H]<sup>+</sup>, 12%). **HRMS (ESI)  $m/z$ :** Calc. for [M+Na]<sup>+</sup>: 295.1417. Found: 295.1415.

### **(R)-5-((1R,3S)-3-methoxycyclohexyl)-5-phenylimidazolidine-2,4-dione ((R,R,S)-10)**

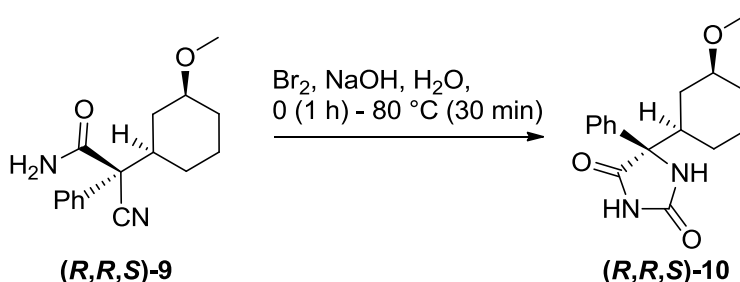

**(R,R,S)-9** (33.3 mg, 0.12 mmol) was cooled to 0 °C and sodium hypobromite solution (freshly prepared from bromine (3.6  $\mu$ L, 0.07 mmol, 0.57 equiv), NaOH (26.4 mg, 0.66 mmol, 5.4 equiv) and water (0.5 mL)) was added and the reaction mixture was stirred for 1 h. Afterwards the reaction was heated to 80 °C for 30 min.<sup>12</sup> Then the mixture was cooled to room temperature, water was added and the mixture was acidified with HCl (1M). The aqueous layer was extracted three times with CH<sub>2</sub>Cl<sub>2</sub> (25 mL), the combined organic phase was dried over Na<sub>2</sub>SO<sub>4</sub>, filtrated and the solvent was removed *in vacuo*. Crystallization of the crude hydantoin from EtOAc resulted in **(R,R,S)-10** (30.0 mg, 0.10 mmol, 85%) as a colourless solid.

**C<sub>16</sub>H<sub>20</sub>N<sub>2</sub>O<sub>2</sub>**, MW: 288.34 g mol<sup>-1</sup>. **Mp:** decomposition >200 °C. **[ $\alpha$ ]<sub>D</sub><sup>20</sup>:** +14.3 (c = 0.30, MeOH). **<sup>1</sup>H NMR (300 MHz, MeOD-D<sub>4</sub>, 21 °C):**  $\delta$  = 7.59-7.55 (m, 2H, arom. H), 7.43-7.33 (m, 3H, arom. H), 3.36 (s, 3H, CHOCH<sub>3</sub>), 3.29-3.22 (m, 1H, CHOCH<sub>3</sub>), 2.33 (tt, J = 12.3, 3.0, 1H, CH), 2.11-1.98 (m, 2H, CH<sub>2</sub>), 1.81-1.71 (m, 1H, CH<sub>2</sub>), 1.23-1.13 (m, 3H, CH<sub>2</sub>), 1.09-0.83 (m, 2H, CH<sub>2</sub>). **<sup>13</sup>C NMR (75 MHz, MeOD-D<sub>4</sub>, 21 °C):**  $\delta$  = 178.1, 159.4, 139.1, 129.7, 129.2, 126.6, 80.4, 73.0, 56.1, 45.1, 34.0, 32.7, 26.6, 24.4. **IR (in MeOD-D<sub>4</sub>):**  $\nu$  = 3220, 3058, 2938, 2851, 2358, 1767, 1716, 1495, 1448, 1260, 1187, 1152, 1083. **MS (ESI)  $m/z$ :** 311.14 ([M+Na]<sup>+</sup>, 22%), 289.15 ([M+H]<sup>+</sup>, 100%), 257.13 ([M – OCH<sub>3</sub>]<sup>+</sup>, 19%), 175.05 ([M – 3-methoxycyclohexyl]<sup>+</sup>, 14%). **HRMS (ESI)  $m/z$ :** Calc. for [M+H]<sup>+</sup>: 289.1547. Found: 189.1550.

## Derivatization of Enantioenriched Michael-Addition Products (*S,R*)-3 from FIP Catalysis

### (*S,R*)-*tert*-Butyl-2-(4-chlorophenyl)-2-cyano-2-((*R*)-6,6-dimethyl-2-oxooxepan-4-yl)acetate (**4hd**)

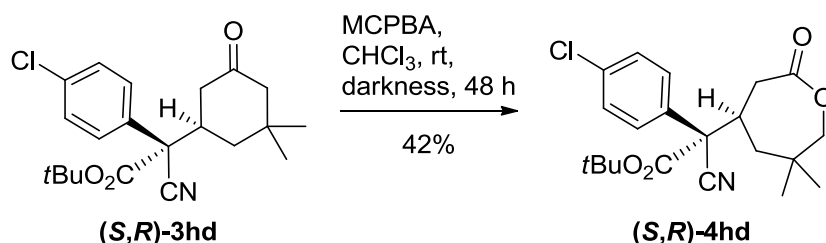

(*S,R*)-**3hd** (28.5 mg, 76  $\mu$ mol,  $ee_{(S,R)} = 94\%$ ) was dissolved in chloroform (1.5 mL) and *m*-chloroperbenzoic acid (MCPBA, 17.1 mg, 99  $\mu$ mol, 1.3 equiv) was added. The reaction was stirred for 48 h at 45 °C in the darkness. Afterwards the reaction mixture was diluted with chloroform (10 mL) and the organic layer was washed with aq. NaHCO<sub>3</sub> (~10%, 1 x 10 mL) and brine (1 x 10 mL). The organic phase was dried over Na<sub>2</sub>SO<sub>4</sub>, filtrated and the solvent removed. Column chromatography of the crude product (PE:EtOAc = 9:1  $\rightarrow$  4:1) resulted in (*S,R*)-**4hd** (12.6 mg, 32  $\mu$ mol, 42%) as a colorless solid.

Constitution and relative configuration of **4hd** were confirmed by X-ray crystal structure analysis. The (*S,R*)/(*R,S*)-configured diastereomer **4hd** crystallized in racemic form in *n*-hexane/*i*PrOH at room temperature. CCDC 856193 contains the supplementary crystallographic data for this compound. These data can be obtained free of charge from the Cambridge Crystallographic Data Centre via [www.ccdc.cam.ac.uk/data\\_request/cif](http://www.ccdc.cam.ac.uk/data_request/cif).

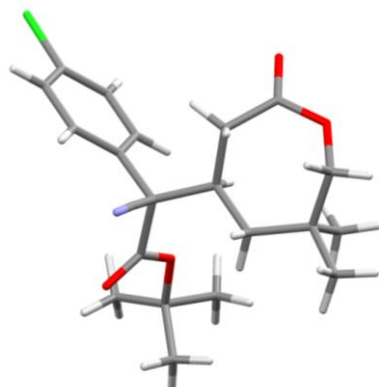

X-ray crystal structure of **4hd** [color code: C (grey); Cl (green); N (blue); O (red); H (white)].

**C<sub>21</sub>H<sub>26</sub>NO<sub>4</sub>Cl**, MW: 391.89 g mol<sup>-1</sup>. **Mp**: 132.0-132.6 °C. [ $\alpha$ ]<sub>D</sub><sup>20</sup>: +34.9 (c = 0.27, CH<sub>2</sub>Cl<sub>2</sub>). **<sup>1</sup>H NMR (300 MHz, CDCl<sub>3</sub>, 21 °C)**:  $\delta$  = 7.55 (d, *J* = 8.7, 2H, arom. *H*), 7.44 (d, *J* = 8.8, 2H, arom. *H*), 4.13 (d, *J* = 13.0, 1H, CH<sub>2</sub>O), 3.83 (d, *J* = 13.0, 1H, CH<sub>2</sub>O), 2.90-2.82 (m, 1H, CH), 2.56-2.48 (m, 1H, CH<sub>2</sub>), 2.23-2.28 (m, 1H, CH<sub>2</sub>), 1.80-1.58 (m, 1H, CH<sub>2</sub>), 1.41 (s, 9H, CH<sub>3</sub>), 1.28-1.16 (m, 1H, CH<sub>2</sub>), 1.13 (s, 3H, CH<sub>2</sub>), 1.03 (s, 3H, CH<sub>2</sub>). **<sup>13</sup>C NMR (75 MHz, CDCl<sub>3</sub>, 21 °C)**:  $\delta$  = 172.5, 165.0, 135.8, 131.1, 129.8, 127.9, 116.2, 85.5, 60.4, 45.6, 37.6, 35.2, 34.4, 28.2, 27.5, 22.1. **IR (solid)**:  $\nu$  = 2947, 2322, 1476, 1447, 1394, 1369, 1280, 1248, 1201, 1148, 1076, 1031. **MS (ESI) *m/z***: 414.15 ([M+Na]<sup>+</sup>, 100%), 357.07 ([M+Na - *t*Bu]<sup>+</sup>, 15%), 335.08 ([M+H - *t*Bu]<sup>+</sup>, 485). **HRMS (ESI) *m/z***: Calc. for [M+Na]<sup>+</sup>: 414.1448. Found: 414.1450.

### **(S)-tert-Butyl-2-cyano-2-((1R,3S)-3-hydroxycyclohexyl)-2-phenylacetate ((S,R,S)-6aa)**

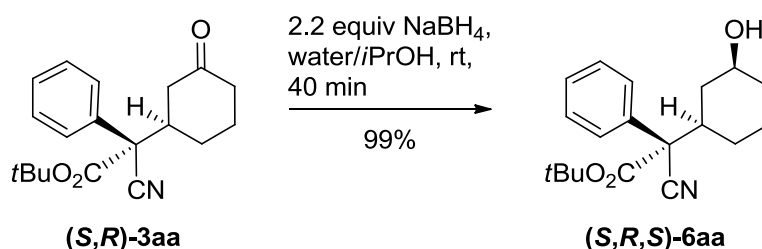

According to GP5 **(S,R)-3aa** (554.3 mg, 1.77 mmol, 1 equiv, *ee*<sub>(S,R)</sub> = 89%) was treated with NaBH<sub>4</sub> (147.2 mg, 3.89 mmol, 2.2 equiv) to yield **(S,R,S)-6aa** (557.0 mg, 1.77 mmol, 99%) as a colorless solid.

Constitution and the absolute configuration of **(S,R,S)-6aa** was confirmed by X-ray crystal structure analysis. **(S,R,S)-6aa** crystallized in enantiomerically pure form in *n*-hexane/*i*PrOH at room temperature. CCDC 856197 contains the supplementary crystallographic data for this compound. These data can be obtained free of charge from the Cambridge Crystallographic Data Centre via [www.ccdc.cam.ac.uk/data\\_request/cif](http://www.ccdc.cam.ac.uk/data_request/cif).

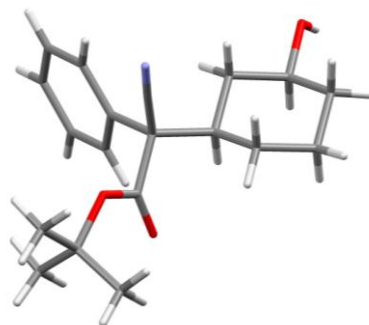

X-ray crystal structure of **(S,R,S)-6aa** [color code: C (grey); N (blue); O (red); H (white)].

**C<sub>19</sub>H<sub>25</sub>NO<sub>3</sub>**, MW: 315.41 g mol<sup>-1</sup>. **Mp**: 123.5-124.2 °C. [ $\alpha$ ]<sub>D</sub><sup>20</sup>: -104.2 (c = 0.38, CH<sub>2</sub>Cl<sub>2</sub>). **<sup>1</sup>H NMR (300 MHz, CDCl<sub>3</sub>, 21 °C)**:  $\delta$  = 7.62-7.55 (m, 2H, arom. H), 7.43-7.34 (m, 3H, arom. H), 3.54-3.44 (m, 1H, CHOH), 2.47-2.37 (m, 1H, CH), 2.02-1.97 (m, 1H, CH<sub>2</sub>), 1.94-1.87 (m, 1H, CH<sub>2</sub>), 1.85-1.82 (m, 1H, CH<sub>2</sub>), 1.48-1.36 (m, 2H, CH<sub>2</sub>), 1.42 (s, 9H, CH<sub>3</sub>), 1.27-1.01 (m, 3H, CH<sub>2</sub>). **<sup>13</sup>C NMR (125 MHz, CDCl<sub>3</sub>, 21 °C)**:  $\delta$  = 166.2, 133.3, 129.0, 128.7, 126.3, 117.2, 84.4, 70.3, 60.5, 43.5, 36.5, 35.1, 29.7, 28.5, 27.6, 23.4. **IR (solid)**:  $\nu$  = 3346, 2937, 2860, 2246, 1734, 1449, 1370, 1250, 1149, 1047, 1032. **MS (ESI) *m/z***: 338.17 ([M+Na]<sup>+</sup>, 100%), 316.19 ([M+H]<sup>+</sup>, 8%), 282.11 ([m+H - *t*Bu]<sup>+</sup>, 16%), 259.17 ([M+H - *t*Bu]<sup>+</sup>, 22%). **HRMS (ESI) *m/z***: Calc. for [M+Na]<sup>+</sup>: 338.1727. Found: 338.1729.

### **(S)-tert-Butyl-3-amino-2-((1R,3S)-3-hydroxycyclohexyl)-3-oxo-2-phenylpropanoate ((S,R,S)-7)**

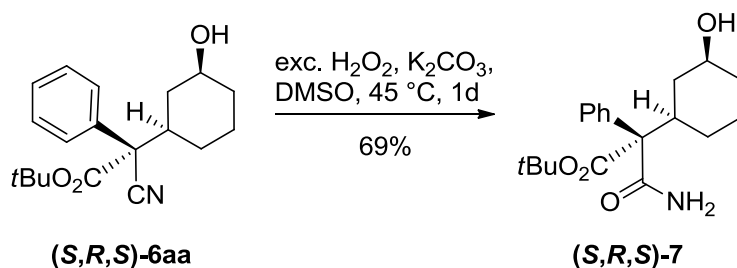

**(S,R,S)-6aa** (436.1 mg, 1.38 mmol) was dissolved in DMSO (28 mL) and K<sub>2</sub>CO<sub>3</sub> (95.4 mg, 0.69 mmol, 0.5 equiv) was added at RT. The mixture was heated to 45 °C under very fast stirring (fast stirring with a large magnetic stirring bar is essential to avoid precipitation of the starting material). Aq. H<sub>2</sub>O<sub>2</sub> (70 mL, 691 mmol, 500 equiv, 35%, 25 equiv/h) and aq. K<sub>2</sub>CO<sub>3</sub> (955.5 mg, 5 equiv, 0.25 equiv/h) were added *via* a syringe pump overnight (20 h). Afterwards the reaction mixture was cooled to RT, acidified with aq. HCl (1M), saturated with NaCl and extracted with EtOAc (4x25 mL). The solvent of the combined organic layer was removed, the residue dissolved in diethyl ether and washed with brine (3 times) to remove dimethylsulfone. The combined organic phase was dried over MgSO<sub>4</sub>, filtrated and concentrated *in vacuo*. Column chromatography of the crude product (CH<sub>2</sub>Cl<sub>2</sub> + 2.5% MeOH → CH<sub>2</sub>Cl<sub>2</sub> + 5% MeOH) resulted in **(S,R,S)-7** (315.9 mg, 0.95 mmol, 69%) as a colorless solid.

Constitution and the absolute configuration of **(S,R,S)-7** was confirmed by X-ray crystal structure analysis. **(S,R,S)-7** crystallized in enantiomerically pure form in CH<sub>2</sub>Cl<sub>2</sub> at -28 °C. CCDC 916148 contains the supplementary crystallographic data for this compound. These data

can be obtained free of charge from the Cambridge Crystallographic Data Centre via [www.ccdc.cam.ac.uk/data\\_request/cif](http://www.ccdc.cam.ac.uk/data_request/cif).

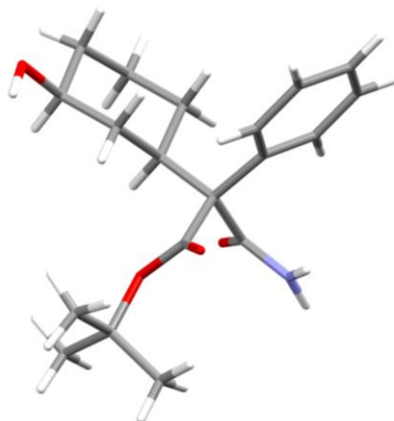

X-ray crystal structure of **(*S,R,S*)-7** [color code: C (grey); N (blue); O (red); H (white)].

**C<sub>19</sub>H<sub>27</sub>NO<sub>4</sub>**, MW: 333.42 g mol<sup>-1</sup>. **Mp**: 69.6-69.9 °C. [ $\alpha$ ]<sub>D</sub><sup>20</sup>: -5.7 (c = 0.12, CH<sub>2</sub>Cl<sub>2</sub>). **<sup>1</sup>H NMR (300 MHz, CDCl<sub>3</sub>, 21 °C)**:  $\delta$  = 7.35-7.26 (*m*, 5H, *arom. H*), 7.00 (*b*, 1H, NH<sub>2</sub>), 5.66 (*b*, 1H, NH<sub>2</sub>), 3.74-3.64 (*m*, 1H, CHOH), 2.74 (*tt*, *J* = 12.0, 2.3, 1H, CH), 2.07-1.95 (*m*, 2H, CH<sub>2</sub>), 1.79-1.54 (*m*, 2H, CH<sub>2</sub>), 1.47 (*s*, 9H, CH<sub>3</sub>), 1.43-1.36 (*m*, 1H, CH<sub>2</sub>), 1.11-0.98 (*m*, 2H, CH<sub>2</sub>), 0.97-0.83 (*m*, 1H, CH<sub>2</sub>). **<sup>13</sup>C NMR (75 MHz, CDCl<sub>3</sub>, 21 °C)**:  $\delta$  = 172.4, 171.5, 137.4, 128.7, 128.0, 127.3, 83.0, 71.0, 67.5, 40.7, 38.4, 35.6, 27.8, 24.1. **IR (solid)**:  $\nu$  = 3344, 2934, 2858, 1670, 1581, 1447, 1367, 1245, 1152, 1045, 840. **MS (ESI) *m/z***: 356.16 ([M+Na]<sup>+</sup>, 100%), 334.20 ([M+H]<sup>+</sup>, 15%), 279.14 ([M - C<sub>6</sub>H<sub>5</sub>]<sup>+</sup>, 29%). **HRMS (ESI) *m/z***: Calc. for [M+Na]<sup>+</sup>: 356.1832. Found: 356.1834.

### **(*R*)-*tert*-Butyl-2-((*tert*-butoxycarbonyl)amino)-2-((1*R*,3*S*)-3-hydroxycyclohexyl)-2-phenylacetate ((*R,R,S*)-8)**

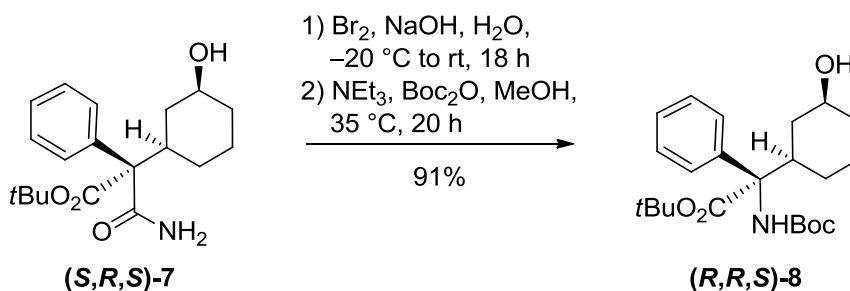

**(*S,R,S*)-7** (88.3 mg, 0.27 mmol) was cooled to -20 °C and sodium hypobromite solution (freshly prepared from bromine (16.3  $\mu$ L, 0.32 mmol, 1.2 equiv), NaOH (63.4 mg, 1.59 mmol, 6 equiv)



and water (2 mL)) was added slowly. The reaction mixture was allowed to warm to room temperature and stirred overnight. Sodium sulfite (~40 mg) was added and the mixture was acidified to pH = 2 with HCl (1M) and stirred for 15 min. Afterwards it was neutralized with sat. NaHCO<sub>3</sub>, brine was added and the mixture was extracted with CH<sub>2</sub>Cl<sub>2</sub> (3 x 25 mL). The combined organic phase was dried over Na<sub>2</sub>SO<sub>4</sub>, filtrated and concentrated *in vacuo* to give the unprotected aminoester. **C<sub>18</sub>H<sub>27</sub>NO<sub>3</sub>**, MW: 305.41 g mol<sup>-1</sup>. **<sup>1</sup>H NMR (300 MHz, CDCl<sub>3</sub>, 21 °C):** δ = 7.57-7.53 (*m*, 2H, *arom. H*), 7.39-7.30 (*m*, 3H, *arom. H*), 3.53-3.43 (*m*, 1H, CHOH), 2.37 (*tt*, *J* = 11.7, 2.9, 1H, CH), 1.99-1.85 (*m*, 2H, CH<sub>2</sub>), 1.65-1.57 (*m*, 1H, CH<sub>2</sub>), 1.44 (*s*, 9H, CH<sub>3</sub>), 1.39-1.33 (*m*, 1H, CH<sub>2</sub>), 1.31-1.08 (*m*, 3H, CH<sub>2</sub>), 1.04-0.92 (*m*, 1H, CH<sub>2</sub>). **<sup>13</sup>C NMR (75 MHz, CDCl<sub>3</sub>, 21 °C):** δ = 170.1, 137.7, 128.4, 128.1, 128.0, 125.9, 84.1, 70.5, 44.7, 35.9, 35.2, 27.7, 27.0, 26.9, 23.4.

The residue was dissolved in MeOH (1 mL), Et<sub>3</sub>N (110 μL, 0.79 mmol, 3 equiv) and Boc<sub>2</sub>O (289 mg, 1.32 mmol, 5 equiv) were added and the reaction was stirred overnight.<sup>9</sup> The solvent was removed *in vacuo*, the residue was dissolved in ethyl acetate and washed once with aq. NaHCO<sub>3</sub> (5%) and twice with brine. Then it was dried over Na<sub>2</sub>SO<sub>4</sub>, filtrated and the solvent was removed *in vacuo*. Column chromatography of the crude product (PE:EtOAc = 18:1 → 9:1) resulted in (***R,R,S***)-**8** (97.6 mg, 0.25 mmol) as a colorless oil.

**C<sub>23</sub>H<sub>35</sub>NO<sub>5</sub>**, MW: 405.53 g mol<sup>-1</sup>. [ $\alpha$ ]<sub>D</sub><sup>20</sup>: -19.6 (*c* = 0.23, CH<sub>2</sub>Cl<sub>2</sub>). **<sup>1</sup>H NMR (300 MHz, CDCl<sub>3</sub>, 21 °C):** δ = 7.56-7.52 (*m*, 2H, *arom. H*), 7.39-7.29 (*m*, 3H, *arom. H*), 4.44-4.34 (*m*, 1H, CHOH), 2.51-2.38 (*m*, 1H, CH), 2.10-2.06 (*m*, 1H, CH<sub>2</sub>), 1.94-1.88 (*m*, 1H, CH<sub>2</sub>), 1.65-1.59 (*m*, 1H, CH<sub>2</sub>), 1.55 (*m*, 1H, CH<sub>2</sub>), 1.44 (*s*, 9H, CH<sub>3</sub>), 1.41 (*s*, 9H, CH<sub>3</sub>), 1.35-1.10 (*m*, 4H, CH<sub>2</sub>). **<sup>13</sup>C NMR (75 MHz, CDCl<sub>3</sub>, 21 °C):** δ = 170.0, 152.8, 137.4, 128.5, 128.1, 125.8, 84.2, 81.8, 44.5, 32.0, 31.5, 30.9, 27.73, 27.68, 26.9, 23.1. **IR (in CDCl<sub>3</sub>):**  $\nu$  = 2979, 2938, 2865, 2238, 1732, 1449, 1394, 1369, 1317, 1277, 1251, 1148, 1098, 984. **MS (ESI) *m/z*:** 406.20 ([M+H]<sup>+</sup>, 100%), 349.15 ([M - *t*Bu+H]<sup>+</sup>, 25%), 272.11 ([M - *t*Bu - Ph+H]<sup>+</sup>, 19%). **HRMS (ESI) *m/z*:** Calc. for [M+H]<sup>+</sup>: 406.2588. Found: 406.2585.

## (S)-tert-Butyl-2-cyano-2-((1R,3S)-3-methoxycyclohexyl)-2-phenylacetate

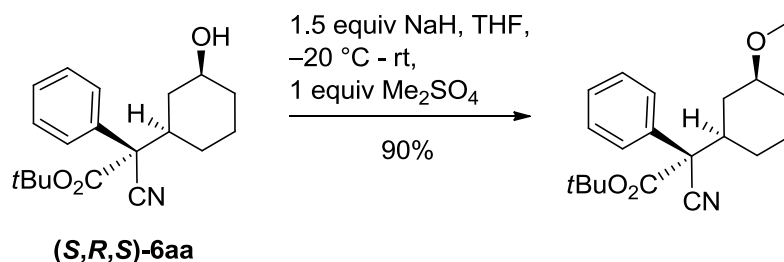

(S,R,S)-6aa (628.6 mg, 1.99 mmol) was dissolved in dry THF (15 mL) and slowly added to a NaH (130 mg, 2.99 mmol, 1.5 equiv, 55-60% in oil) suspension in THF (5 mL) at  $-20\text{ }^{\circ}\text{C}$ . The reaction was allowed to warm to room temperature and stirred for additional 30 min. Afterwards dimethylsulfate (234  $\mu\text{L}$ , 2.19 mmol, 1.1 equiv) was added in one portion at  $-20\text{ }^{\circ}\text{C}$ , the reaction was allowed to warm to room temperature and stirred for additional 30 min for complete conversion.<sup>10</sup> Saturated aq.  $\text{NH}_4\text{Cl}$  was added carefully, the mixture was acidified with HCl (1M) and extracted three times with  $\text{Et}_2\text{O}$ . The combined organic layer was dried over  $\text{Na}_2\text{SO}_4$ , filtrated and the solvent removed *in vacuo* to give the crude product. Column chromatography (PE:EtOAc = 20:1) resulted in (S)-tert-butyl-2-cyano-2-((1R,3S)-3-methoxycyclohexyl)-2-phenylacetate (593.4 mg, 1.80 mmol, 90%) as a colorless solid.

$\text{C}_{20}\text{H}_{27}\text{NO}_3$ , MW: 329.43  $\text{g mol}^{-1}$ . Mp: 86.1-87.4  $^{\circ}\text{C}$ .  $[\alpha]_{\text{D}}^{20}$ :  $-3.8$  ( $c = 0.40$ ,  $\text{CH}_2\text{Cl}_2$ ).  $^1\text{H NMR}$  (300 MHz,  $\text{CDCl}_3$ , 21  $^{\circ}\text{C}$ ):  $\delta = 7.59\text{-}7.55$  (m, 2H, arom. H), 7.43-7.34 (m, 3H, arom. H), 3.20 (s, 3H,  $\text{CHOCH}_3$ ), 3.09-2.96 (m, 1H,  $\text{CHOCH}_3$ ), 2.45-2.35 (m, 1H, CH), 2.11-2.07 (m, 1H,  $\text{CH}_2$ ), 1.94-1.73 (m, 3H,  $\text{CH}_2$ ), 1.42 (s, 9H,  $\text{CH}_3$ ), 1.38-0.98 (m, 4H,  $\text{CH}_2$ ).  $^{13}\text{C NMR}$  (75 MHz,  $\text{CDCl}_3$ , 21  $^{\circ}\text{C}$ ):  $\delta = 166.3$ , 133.3, 129.0, 128.9, 126.3, 117.2, 84.4, 78.7, 60.6, 55.5, 43.5, 33.0, 31.2, 28.9, 27.6, 26.9, 23.3. IR (in  $\text{CDCl}_3$ ):  $\nu = 2978$ , 2938, 2863, 2823, 2237, 1736, 1493, 1450, 1394, 1370, 1252, 1153, 1093, 1037, 996. MS (ESI)  $m/z$ : 352.19 ( $[\text{M}+\text{Na}]^+$ , 14%), 338.17 ( $[\text{M}-\text{CH}_3+\text{Na}+\text{H}]^+$ , 100%), 282.11 ( $[\text{M}-\text{COO}t\text{Bu}]^+$ , 57%), 260.13 ( $[\text{M}-\text{CH}_3-\text{C}_6\text{H}_5+\text{Na}]^+$ , 7%). HRMS (ESI)  $m/z$ : Calc. for  $[\text{M}+\text{Na}]^+$ : 352.1883. Found: 352.1872.

## (S)-2-Cyano-2-((1R,3S)-3-methoxycyclohexyl)-2-phenylacetamide ((S,R,S)-9)

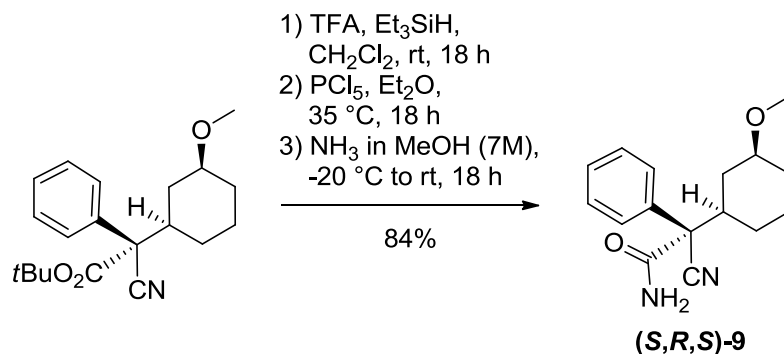

1) Hydrolysis of the ester:<sup>11</sup> To a solution of (*S*)-*tert*-Butyl-2-cyano-2-((1*R*,3*S*)-3-methoxycyclohexyl)-2-phenylacetate (159.4 mg, 0.48 mmol) in dry CH<sub>2</sub>Cl<sub>2</sub> (1 mL) was added trifluoroacetic acid (467 μL, 6.29 mmol, 13 equiv) and triethylsilane (195 μL, 1.21 mmol, 2.5 equiv) at room temperature and the reaction was stirred overnight. The solvent was removed *in vacuo* and *n*-pentane (~7 mL) was added to precipitate the acid, which was isolated by decantation of the residual liquid and dried in high vacuum.

2) Formation of the acid chloride:<sup>12</sup> To the acid was added dry Et<sub>2</sub>O (4 mL) and PCl<sub>5</sub> (108 mg, 0.51 mmol, 1.05 equiv). The mixture was stirred overnight at room temperature.

3) Formation of the amide:<sup>12</sup> The acid chloride solution was added slowly to a NH<sub>3</sub> solution in MeOH (7M, 4 mL) at -20 °C. After 1 h the reaction was warmed to room temperature and stirred overnight. The solvent was removed, water was added and the mixture was washed three times with Et<sub>2</sub>O. The combined organic phase was dried over Na<sub>2</sub>SO<sub>4</sub>, filtrated and solvent removed *in vacuo* to give the crude product. Column chromatography (CH<sub>2</sub>Cl<sub>2</sub> + 2.5% MeOH) resulted in (*S,R,S*)-9 (110 mg, 0.40 mmol, 84%) as a colorless oil.

**C<sub>16</sub>H<sub>20</sub>N<sub>2</sub>O<sub>2</sub>**, MW: 272.34 g mol<sup>-1</sup>. [α]<sub>D</sub><sup>20</sup>: +1.3 (c = 0.30, CH<sub>2</sub>Cl<sub>2</sub>). <sup>1</sup>H NMR (300 MHz, CDCl<sub>3</sub>, 21 °C): δ = 7.64-7.59 (m, 2H, arom. H), 7.44-7.34 (m, 3H, arom. H), 6.34 (b, 1H, NH<sub>2</sub>), 5.88 (b, 1H, NH<sub>2</sub>), 3.20 (s, 3H, CHOCH<sub>3</sub>), 3.09-2.99 (m, 1H, CHOCH<sub>3</sub>), 2.58-2.49 (m, 1H, CH), 2.13-2.08 (m, 1H, CH<sub>2</sub>), 1.92-1.89 (m, 2H, CH<sub>2</sub>), 1.55-1.51 (m, 1H, CH<sub>2</sub>), 1.43-1.22 (m, 2H, CH<sub>2</sub>), 1.17-0.94 (m, 2H, CH<sub>2</sub>). <sup>13</sup>C NMR (75 MHz, CDCl<sub>3</sub>, 21 °C): δ = 168.0, 133.4, 129.1, 128.9, 126.3, 125.9, 119.0, 78.7, 59.6, 55.6, 43.0, 33.3, 31.1, 28.9, 23.2. IR (in CDCl<sub>3</sub>): ν = 3331, 3192, 2937, 2861, 2826, 2241, 1692, 1607, 1493, 1449, 1350, 1278, 1198, 1147, 1088. MS (ESI) *m/z*: 295.14 ([M+Na]<sup>+</sup>, 100%), 273.16 ([M+H]<sup>+</sup>, 2%), 241.13 ([M - OCH<sub>3</sub>]<sup>+</sup>, 13%),

160.07 ( $[M - 3\text{-methoxycyclohexyl} + \text{H}]^+$ , 12%). HRMS (ESI)  $m/z$ : Calc. for  $[M + \text{Na}]^+$ : 295.1417. Found: 295.1418.

**(S)-5-((1R,3S)-3-Methoxycyclohexyl)-5-phenylimidazolidine-2,4-dione**  
**((S,R,S)-10)**

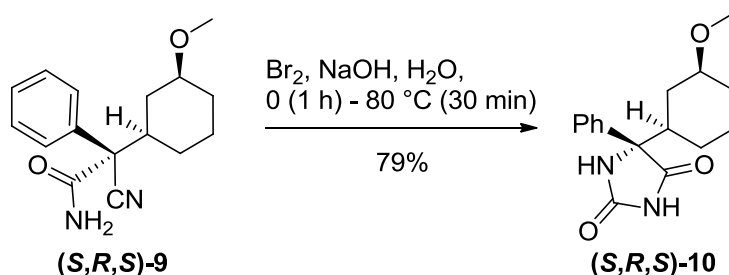

**(S,R,S)-9** (70.9 mg, 0.26 mmol) was cooled to 0 °C and sodium hypobromite solution (freshly prepared from bromine (7.6  $\mu\text{L}$ , 0.15 mmol, 0.57 equiv),  $\text{NaOH}$  (56.2 mg, 1.40 mmol, 5.4 equiv) and water (1 mL)) were added and the reaction was stirred for 1 h. Afterwards the reaction was heated to 80 °C for 30 min.<sup>12</sup> Then the mixture was cooled to room temperature, water was added and the mixture was acidified with  $\text{HCl}$  (1M). The aqueous layer was extracted three times with  $\text{CH}_2\text{Cl}_2$  (25 mL), the combined organic phase was dried over  $\text{Na}_2\text{SO}_4$ , filtrated and the solvent removed *in vacuo*. Column chromatography of the crude hydantoin (PE:EtOAc = 2:1  $\rightarrow$  1:1) resulted in **(S,R,S)-10** (59.4 mg, 0.21 mmol, 79%) as a colorless solid.

Constitution and absolute configuration of **(S,R,S)-10** was confirmed by X-ray crystal structure analysis. **(S,R,S)-10** crystallized in enantiomerically pure form in MeOH/MeCN at room temperature. CCDC 884921 contains the supplementary crystallographic data for this compound. These data can be obtained free of charge from the Cambridge Crystallographic Data Centre via [www.ccdc.cam.ac.uk/data\\_request/cif](http://www.ccdc.cam.ac.uk/data_request/cif).

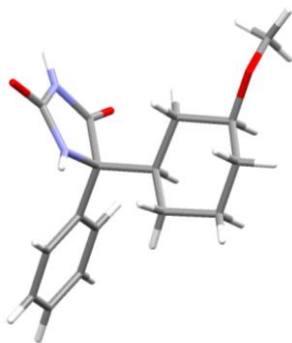

X-ray crystal structure of **(S,R,S)-10** [color code: C (grey); N (blue); O (red); H (white)]. Two included water molecules per unit cell are omitted for clarity.

**C<sub>16</sub>H<sub>20</sub>N<sub>2</sub>O<sub>3</sub>**, MW: 288.34 g mol<sup>-1</sup>. **Mp**: decomposition >200 °C. **[α]<sub>D</sub><sup>20</sup>**: +49.3 (c = 0.28, MeOH). **<sup>1</sup>H NMR (300 MHz, MeOD-D<sub>4</sub>, 21 °C)**: δ = 7.59-7.55 (m, 2H, *arom. H*), 7.45-7.31 (m, 3H, *arom. H*), 3.36 (s, 3H, CHOCH<sub>3</sub>), 3.30-3.21 (m, 1H, CHOCH<sub>3</sub>), 2.33 (tt, J = 12.3, 3.0, 1H, CH), 2.11-1.98 (m, 2H, CH<sub>2</sub>), 1.78-1.72 (m, 1H, CH<sub>2</sub>), 1.36-0.82 (m, 5H, CH<sub>2</sub>). **<sup>13</sup>C NMR (75 MHz, MeOD-D<sub>4</sub>, 21 °C)**: δ = 178.1, 159.4, 139.1, 129.7, 129.2, 126.6, 80.4, 73.0, 56.1, 45.1, 34.0, 32.7, 26.6, 24.4. **IR (in MeOD-D<sub>4</sub>)**: ν = 3227, 3065, 2938, 2860, 2357, 1769, 1716, 1495, 1448, 1398, 1359, 1262, 1187, 1152, 1084. **MS (ESI) m/z**: 311.14 ([M+Na]<sup>+</sup>, 22%), 289.15 ([M+H]<sup>+</sup>, 100%), 257.13 ([M - OCH<sub>3</sub>]<sup>+</sup>, 19%), 175.05 ([M - 3-methoxycyclohexyl]<sup>+</sup>, 14%). **HRMS (ESI) m/z**: Calc. for [M+H]<sup>+</sup>: 289.1547. Found: 189.1542.

## Determination of the Absolute Configuration by X-Ray Analysis and Chemical Correlation

Various crystal structures could be solved by X-ray diffraction to determine the configuration of the products. The following color code is used: C (gray); N (blue); O (red); H (white), Br (brown), Cl (green). For details about the syntheses and product characterizations, see the previous chapters.

- Determination of the absolute configuration of **(R,R)-3ia** was possible from the crystal structure of **(R,R)-4ia**, which was synthesized from **(R,R)-3ia** (single diastereomer,  $ee_{(R,R)} = 90\%$ ) and crystallized in enantiomerically pure form from *n*-hexane/*i*PrOH at room temperature.

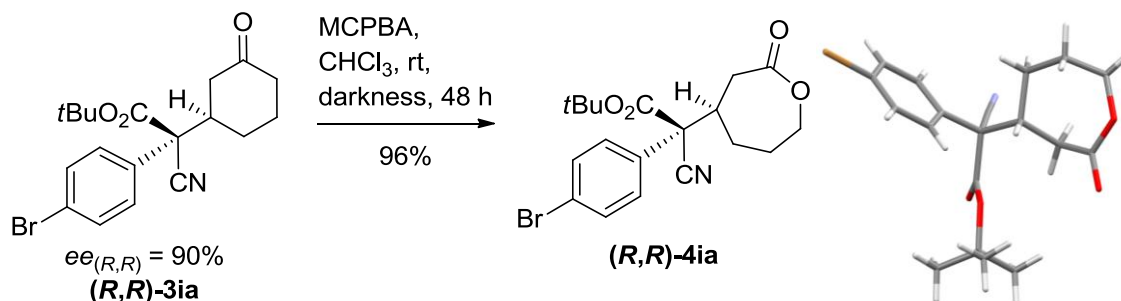

**(S,R,S)-6aa** was synthesized from **(S,R)-3aa** (single diastereomer,  $ee_{(R,R)} = 89\%$ ) and crystallized in enantiomerically pure form in *n*-hexane/*i*PrOH at room temperature. **(S,R,S)-6aa** was further converted into **(S,R,S)-7** and crystallized in enantiomerically pure form from CH<sub>2</sub>Cl<sub>2</sub> at  $-28\text{ }^\circ\text{C}$ . For both products the absolute configuration was determined by X-ray analysis.

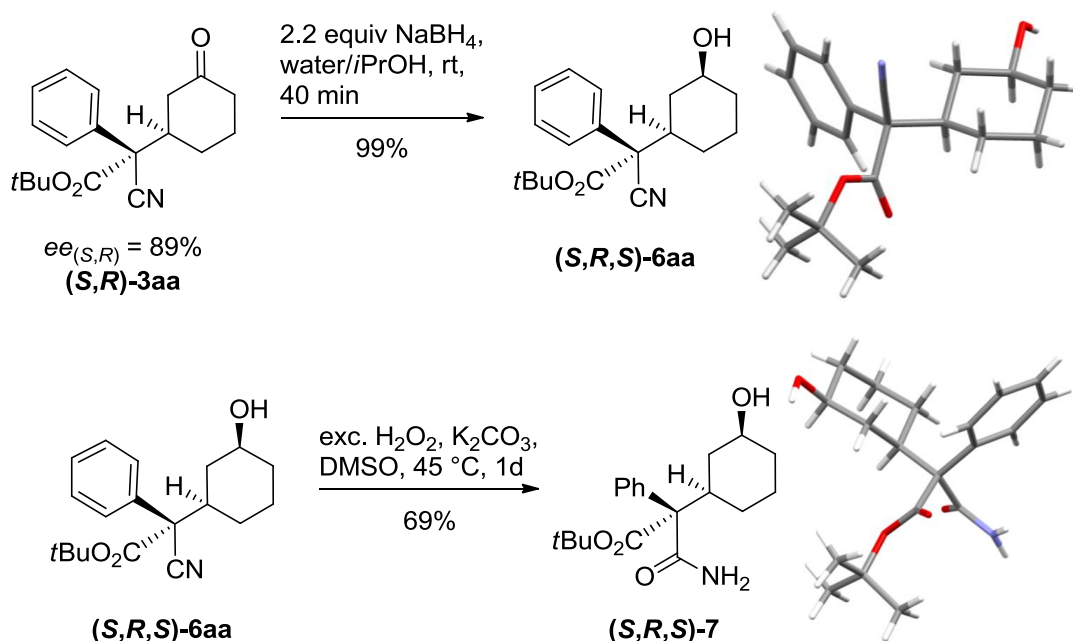

(*S,R,S*)-**10** was synthesized in a six step sequence from (*S,R*)-**3aa** (single diastereomer,  $ee_{(R,R)} = 89\%$ ) and crystallized in enantiomerically pure form from MeOH/MeCN at room temperature. Its absolute configuration was determined by X-ray analysis.

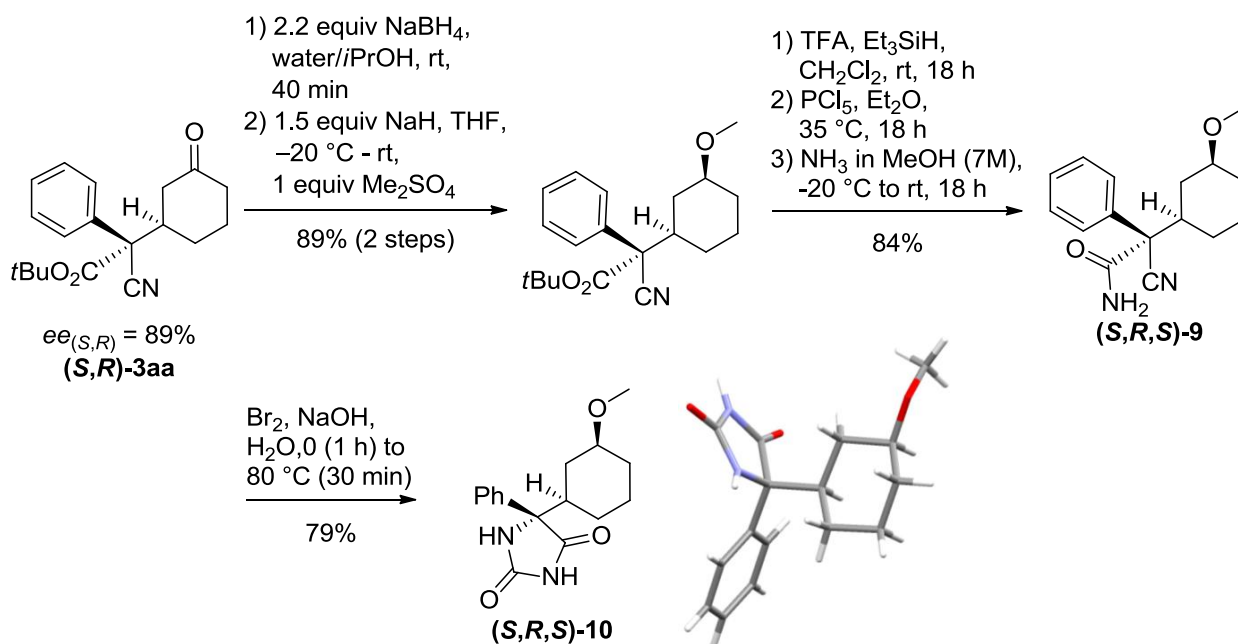

• Determination of the relative configuration was possible for the following crystal structures: The (*R,R*)/(*S,S*)-configured diastereomer **3ha** crystallized preferentially in racemic form (from a sample with  $ee_{(R,R)} = 99\%$ ) from *n*-hexane/*i*PrOH at room temperature.

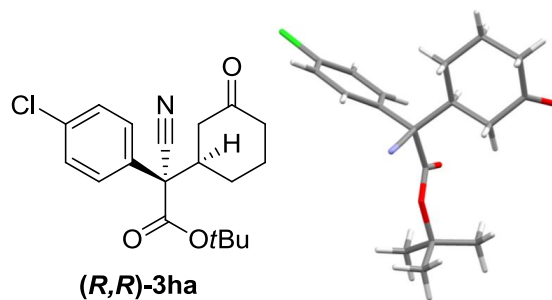

The (*R,R*)/(*S,S*)-configured diastereomer **3ia** crystallized preferentially in racemic form (from a sample with  $ee_{(R,R)} = 90\%$ ) from diethylether at room temperature.

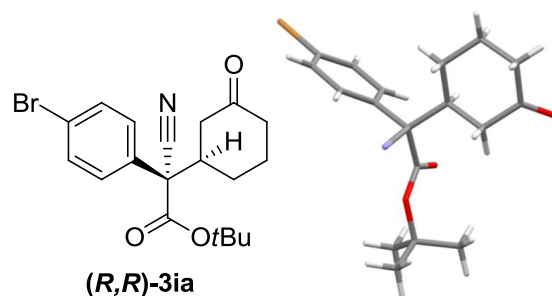

**rac-6ma** was synthesized from **rac-3ma** and crystallized preferentially as the (*S,R,S*)/(*R,S,R*)-configured diastereomer (from a racemic sample with both diastereomers) from *n*-hexane/*i*PrOH at room temperature.

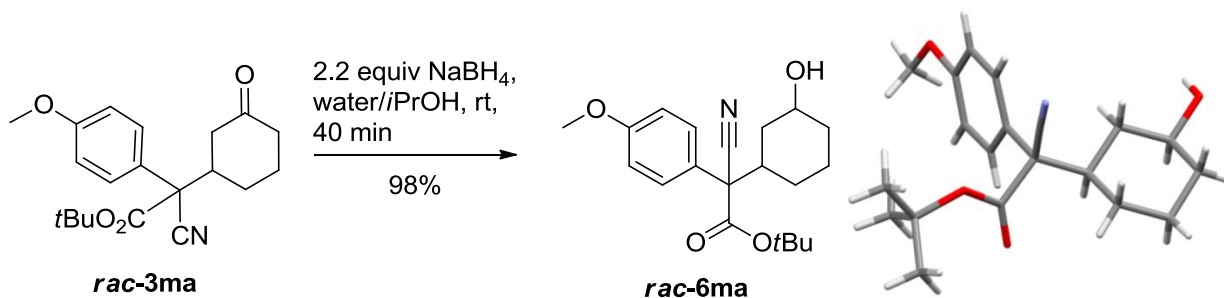

**(*R,R,S*)-6aa** was synthesized from **(*R,R*)-3aa** (single diastereomer,  $ee_{(R,R)} = 94\%$ ) and crystallized preferentially in racemic form from *n*-hexane/*i*PrOH at room temperature.

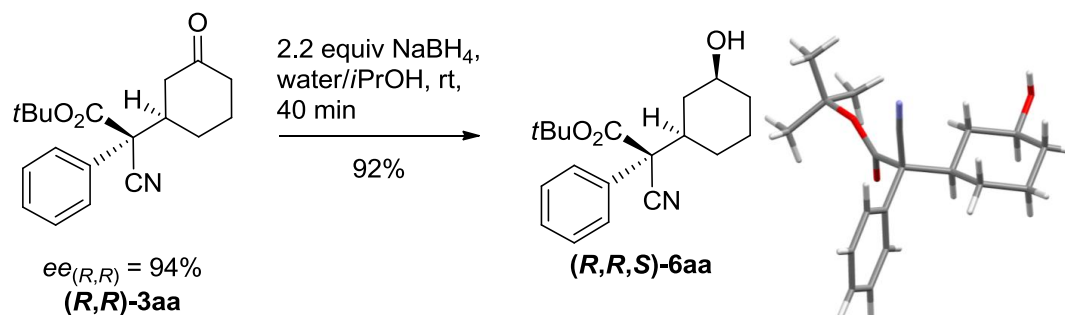

**(*S,R*)-4hd** was synthesized from **(*S,R*)-3hd** (single diastereomer,  $ee_{(S,R)} = 94\%$ ) and crystallized preferentially in racemic form from *n*-hexane/*i*PrOH at room temperature.

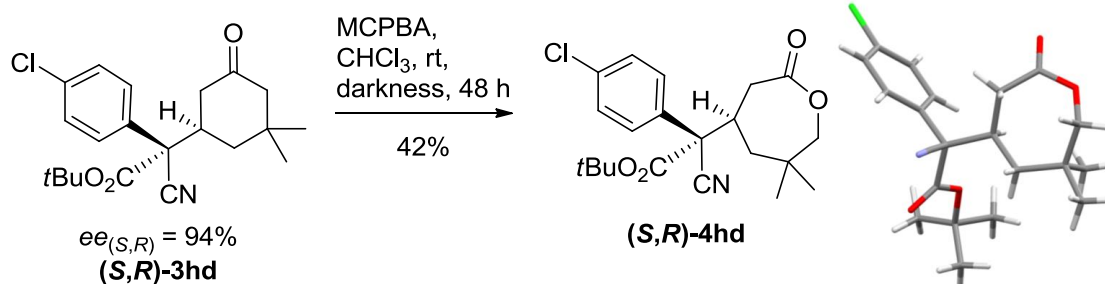

• Determination of the constitution of **3id** was possible from the following crystal structure: **3id** crystallized preferentially in racemic form (from a sample with both diastereomers,  $ee_{(S,R)} = 91\%$  and  $ee_{(R,R)} = 91\%$ ,  $dr_{(S,R+R,S):(R,R+S,S)} = 82:18$ ) in *n*-hexane/*i*PrOH at room temperature. The unit cell contains both diastereomers.



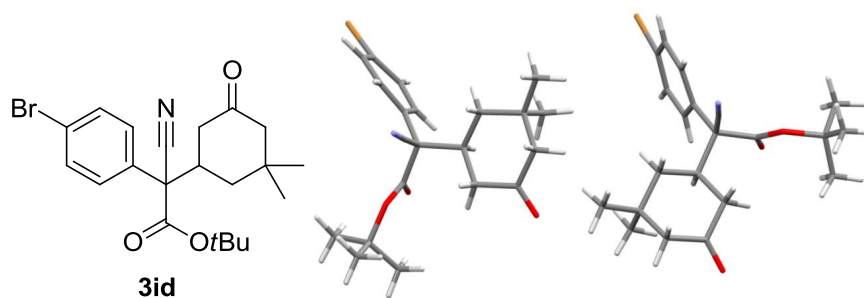

## Transformation of (*R,R*)-**3ab** into (*R,R*)-**3aa** and further into (*R,R*)-**3ac** by Gradual Ring Expansion

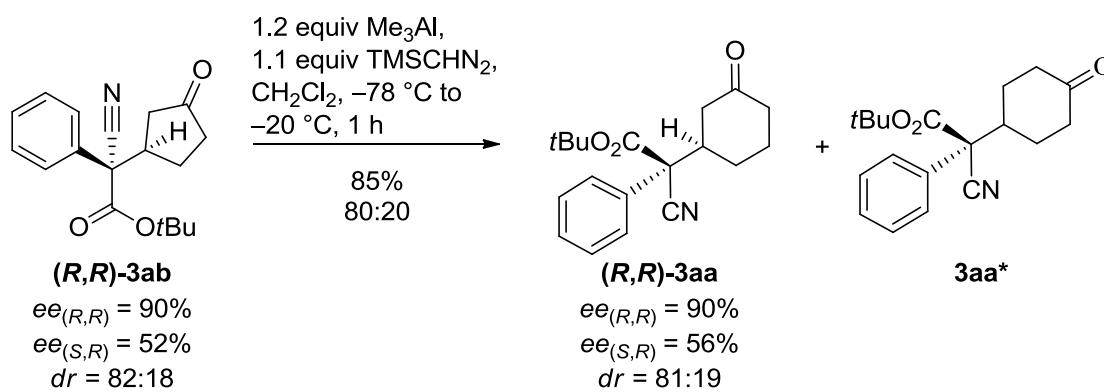

To a solution of trimethylaluminum in toluene (573.2  $\mu\text{L}$ , 1.15 mmol, 1.2 equiv, 2M in toluene) was added the enantioenriched ketone (**(*R,R*)-3ab**) (286.0 mg, 0.96 mmol, 1 equiv,  $ee_{(R,R)} = 90\%$ ,  $ee_{(S,R)} = 52\%$ ,  $dr_{(R,R+S,S):(S,R+R,S)} = 82:18$ ) in  $\text{CH}_2\text{Cl}_2$  at  $-78\text{ }^\circ\text{C}$  under nitrogen atmosphere. Trimethylsilyldiazomethane in hexane (525.5  $\mu\text{L}$ , 1.05 mmol, 1.1 equiv, 2M in hexane) was added in one portion at this temperature.<sup>13</sup> The mixture was allowed to warm to  $-20\text{ }^\circ\text{C}$  and stirring was continued for one hour. The reaction mixture was then poured into 1M aq. HCl solution and extracted with  $\text{CH}_2\text{Cl}_2$ . The combined organic phase was dried over  $\text{Na}_2\text{SO}_4$ , filtered and the solvent was removed in vacuo. Column chromatography of the crude product (PE:EtOAc = 9:1) resulted in (**(*R,R*)-3aa**) (204.1 mg, 0.65 mmol, 68%,  $ee_{(R,R)} = 90\%$ ,  $ee_{(S,R)} = 56\%$ ,  $dr_{(R,R+S,S):(S,R+R,S)} = 81:19$ ) as a colorless oil. As mentioned before the  $ee$  values of **3aa** were determined by chiral column HPLC: Chiracel OD-H, *n*-hexane/*i*-PrOH (99/1), 0.9 mL  $\text{min}^{-1}$ , detection at 210 nm,  $t_{(R,R)} = 13.3$  min,  $t_{(S,S)} = 41.3$  min,  $t_{(S,R)} = 17.8$  min,  $t_{(R,S)} = 12.1$  min. In a second fraction the regioisomer **3aa\*** (49.9 mg, 0.16 mmol, 17%) was obtained as colourless oil.

For characterization of **3aa**, see above.

Side product **3aa\***:  $C_{19}H_{23}NO_3$ , MW:  $313.39 \text{ g mol}^{-1}$ .  $^1H$  NMR (300 MHz,  $CDCl_3$ , 21 °C):  $\delta = 7.63\text{-}7.55$  (m, 2H, arom. H),  $7.47\text{-}7.37$  (m, 3H, arom. H),  $2.83$  (tt,  $J = 11.6, 3.7$ , 1H, CH),  $2.65\text{-}2.46$  (m, 3H,  $CH_2$ ),  $2.41\text{-}2.32$  (m, 1H,  $CH_2$ ),  $2.30\text{-}2.17$  (m, 2H,  $CH_2$ ),  $2.03\text{-}1.88$  (m, 2H,  $CH_2$ ),  $1.75\text{-}1.50$  (m, 2H,  $CH_2$ ),  $1.43$  (s, 9H,  $CH_3$ ).  $^{13}C$  NMR (75 MHz,  $CDCl_3$ , 21 °C):  $\delta = 209.5, 166.0, 133.4, 129.2, 128.9, 126.1, 116.8, 84.9, 59.7, 47.8, 42.1, 40.1, 28.9, 27.6, 26.9$ . IR (film):  $\nu = 2978, 2939, 2247, 1733, 1716, 1449, 1370, 1250, 1148, 1073, 1035, 914$ . MS (ESI)  $m/z$ :  $336.16$  ( $[M+Na]^+$ , 100%). HRMS (ESI)  $m/z$ : Calc. for  $[M+Na]^+$ : 336.1570. Found: 336.1571.

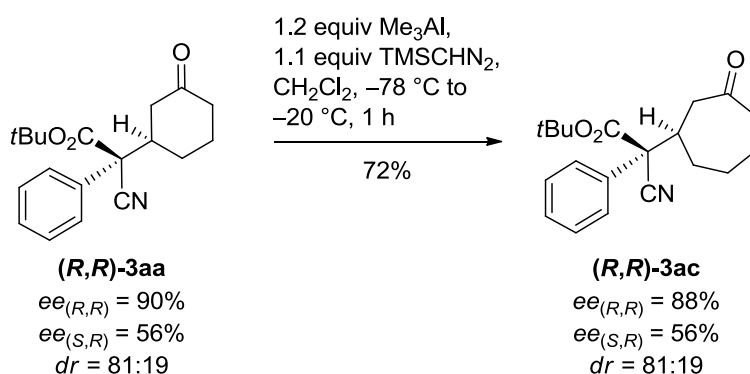

The next ring expansion to the 7-membered ring was achieved in analogy to the above described procedure. The enantioenriched ketone **(R,R)-3aa** (50.2 mg, 0.16 mmol,  $ee_{(R,R)} = 90\%$ ,  $ee_{(S,R)} = 56\%$ ,  $dr_{(R,R+S,S):(S,R+R,S)} = 81:19$ ) was treated with trimethylaluminum (96  $\mu$ L, 0.19 mmol, 1.2 equiv, 2M in toluene) and trimethylsilyldiazomethane (88  $\mu$ L, 0.18 mmol, 1.1 equiv, 2M in hexane) at  $-78$  °C. The reaction mixture was stirred again for one hour at  $-20$  °C. Column chromatography of the crude product (PE:EtOAc = 9:1) resulted in **(R,R)-3ac** (37.6 mg, 0.11 mmol, 72%,  $ee_{(R,R)} = 88\%$ ,  $ee_{(S,R)} = 56\%$ ,  $dr_{(R,R+S,S):(S,R+R,S)} = 81:19$ ) as a colorless oil. As mentioned before the  $ee$  values of **3ac** were determined by chiral column HPLC: Chiracel OD-H,  $n$ -hexane/ $i$ -PrOH (99/1), 2 mL  $min^{-1}$ , detection at 210 nm,  $t_{(R,R)} = 5.6$  min,  $t_{(S,S)} = 7.0$  min,  $t_{(S,R)} = 6.3$  min,  $t_{(R,S)} = 32.2$  min.

For characterization of **3ac**, see above.

## Reductive Dehalogenation of Michael-Addition Products

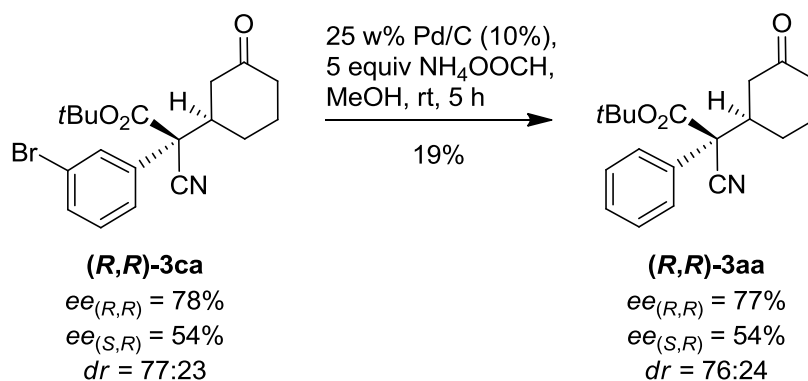

According to GP5 enantioenriched (**(*R,R*)-3ca**) (15.9 mg, 41  $\mu\text{mol}$ ,  $ee_{(R,R)} = 78\%$ ,  $ee_{(S,R)} = 54\%$ ,  $dr_{(R,R+S,S):(S,R+R,S)} = 77:23$ ) in MeOH was treated with ammonium formate (12.8 mg, 0.20 mmol, 5 equiv) and palladium on charcoal (10%, 4.0 mg) to yield (**(*R,R*)-3aa**) (2.4 mg, 8  $\mu\text{mol}$ , 19%,  $ee_{(R,R)} = 77\%$ ,  $ee_{(S,R)} = 54\%$ ,  $dr_{(R,R+S,S):(S,R+R,S)} = 76:24$ ) as colorless oil. The  $dr$  and  $ee$  values were determined by chiral column HPLC: Chiracel OD-H, *n*-hexane/*i*-PrOH (99/1), 0.9 mL  $\text{min}^{-1}$ , detection at 210 nm. For characterization of **3aa**, see above.

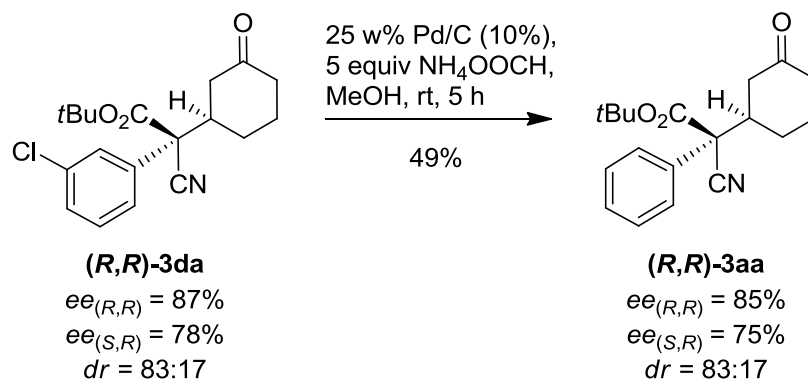

According to GP5 enantioenriched (**(*R,R*)-3da**) (20.0 mg, 57  $\mu\text{mol}$ ,  $ee_{(R,R)} = 87\%$ ,  $ee_{(S,R)} = 78\%$ ,  $dr_{(R,R+S,S):(S,R+R,S)} = 83:17$ ) in MeOH was treated with ammonium formate (18.1 mg, 0.29 mmol, 5 equiv) and palladium on charcoal (10%, 5.0 mg) to yield (**(*R,R*)-3aa**) (8.9 mg, 28  $\mu\text{mol}$ , 49%,  $ee_{(R,R)} = 85\%$ ,  $ee_{(S,R)} = 75\%$ ,  $dr_{(R,R+S,S):(S,R+R,S)} = 83:17$ ) as colorless oil. The  $dr$  and  $ee$  values were determined by chiral column HPLC: Chiracel OD-H, *n*-hexane/*i*-PrOH (99/1), 0.9 mL  $\text{min}^{-1}$ , detection at 210 nm. For characterization of **3aa**, see above.

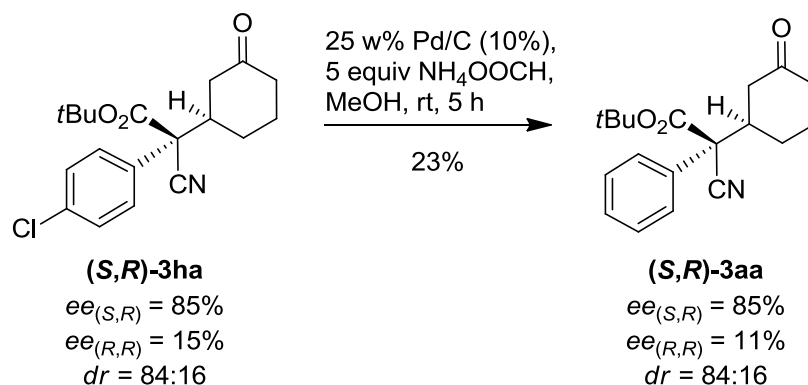

According to GP5 enantioenriched **(S,R)-3ha** (42.5 mg, 0.12 mmol,  $ee_{(S,R)} = 85\%$ ,  $ee_{(R,R)} = 15\%$ ,  $dr_{(S,R+R,S):(R,R+S,S)} = 84:16$ ) in MeOH was treated with ammonium formate (38.5 mg, 0.61 mmol, 5 equiv) and palladium on charcoal (10%, 10.6 mg) to yield in **(S,R)-3aa** (8.8 mg, 28  $\mu\text{mol}$ , 23%,  $ee_{(S,R)} = 85\%$ ,  $ee_{(R,R)} = 11\%$ ,  $dr_{(S,R+R,S):(R,R+S,S)} = 84:16$ ) as colorless oil. The  $dr$  and  $ee$  values were determined by chiral column HPLC: Chiracel OD-H, *n*-hexane/*i*-PrOH (99/1), 0.9 mL  $\text{min}^{-1}$ , detection at 210 nm. For characterization of **3aa**, see above.

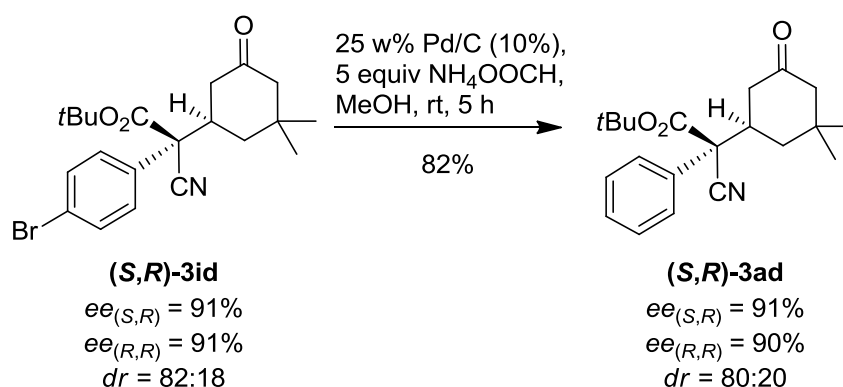

According to GP5 enantioenriched **(S,R)-3id** (15.5 mg, 37  $\mu\text{mol}$ ,  $ee_{(S,R)} = 91\%$ ,  $ee_{(R,R)} = 91\%$ ,  $dr_{(S,R+R,S):(R,R+S,S)} = 82:18$ ) in MeOH was treated with ammonium formate (11.6 mg, 0.18 mmol, 5 equiv) and palladium on charcoal (10%, 3.9 mg) to yield in **(S,R)-3aa** (10.3 mg, 30  $\mu\text{mol}$ , 82%,  $ee_{(S,R)} = 91\%$ ,  $ee_{(R,R)} = 90\%$ ,  $dr_{(S,R+R,S):(R,R+S,S)} = 80:20$ ) as colorless oil. The  $dr$  and  $ee$  values were determined by chiral column HPLC: Chiracel OD-H, *n*-hexane/*i*-PrOH (99/1), 0.7 mL  $\text{min}^{-1}$ , detection at 210 nm. For characterization of **3ad**, see above.

# Kinetic Investigations of the FBIP Catalyzed Asymmetric Michael-Addition

## Experimental

The catalysis reactions were performed according to GP 3 with the mentioned addition order (to the cyanoacetate **1a** is added acetic acid as stock solution, the catalyst as stock solution and finally the enone **2a** at 35 °C, except in the case of reverse substrate addition, see below) using 0.09 mmol **1a** in 170  $\mu\text{L}$  solvent. For the determination of the reaction order of **1a**, 0.19 mmol enone **2a** was used in 170  $\mu\text{L}$  of solvent. In all cases the time measurement was started with the addition of the enone **2a** (or **1a** in the case of reverse addition order of substrates, see below) at 35 °C. For monitoring, aliquots of 10  $\mu\text{L}$  of the reaction mixture were taken and added to 200  $\mu\text{L}$  of acetonitrile to stop the reaction (confirmed by HPLC analysis) and to release product and starting material from the catalyst. The samples were analyzed by RP-HPLC (RP-18 column, gradient of acetonitrile/water as eluent, detection at 210 nm,  $t_{(1a)} = 2.0$  min,  $t_{(3aa)} = 2.3$  min) and the conversion and product concentration/yield of each sample was calculated by the corresponding calibration curve (Figure 1).

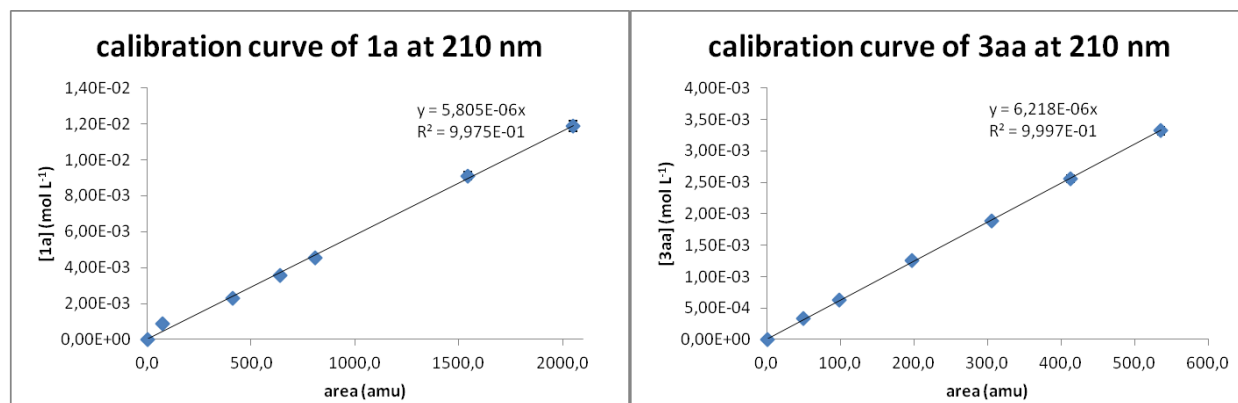

**Figure 1:** Left: Calibration curve of **1a** at 210 nm. Right: Calibration curve of **3aa** at 210 nm.

The initial reaction rates  $r$  were calculated from the [product]-time data of each reaction and the error for each value was calculated from the test series standard deviation (probability of 95%).

The partial reaction order of one compound (in this example for the catalyst, eq. 1 to 3) was determined by variation of its concentration while the other reagents were present in excess (simplification of eq. 1 to eq. 2)<sup>14</sup>.

$$r = k \cdot c_{catalyst}^{m_1} \cdot c_{enone}^{m_2} \cdot c_{CA}^{m_3} \cdot c_{HOAc}^{m_4} \cdot c_{diglyme}^{m_5} \quad (\text{eq. 1})$$

$$r = k^* \cdot c_{catalyst}^{m_1} \quad \text{with} \quad k^* = k \cdot c_{enone,0}^{m_2} \cdot c_{CA,0}^{m_3} \cdot c_{HOAc,0}^{m_4} \cdot c_{diglyme}^{m_5} = const. \quad (\text{eq. 2})$$

Logarithmic transformation of the obtained initial conversion rate/concentration data results in the partial reaction order  $m_i$  of the corresponding compound (eq. 3).

$$\ln r = \ln k^* + m_1 \cdot \ln c_{catalyst} \quad (\text{eq. 3})$$

## Reaction Order of the Catalyst FBIP-O<sub>2</sub>CC<sub>3</sub>F<sub>7</sub>

The determination of the reaction order of the catalyst **FBIP-O<sub>2</sub>CC<sub>3</sub>F<sub>7</sub>** was achieved in two slightly different series:

- normal catalysis procedure as mentioned above with 0.25 to 2.00 mol% catalyst
- reverse substrate addition (cyanoacetate **1a** is added as final component) using 0.25 to 1.25 mol% catalyst

The corresponding results are discussed in detail in the following section:

### a) Normal Procedure with 0.25 to 2.00 mol% Catalyst

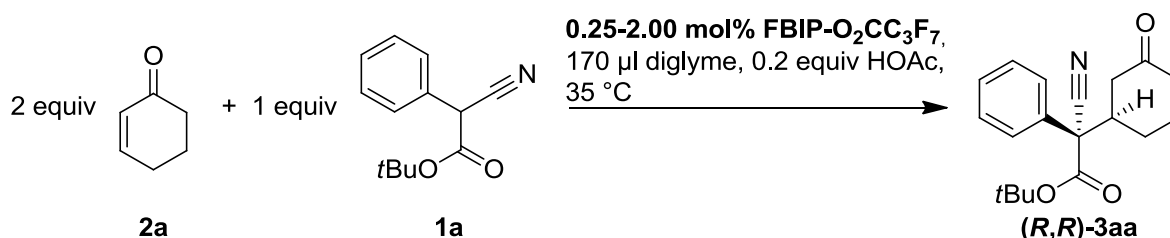

In the first series for the determination of the order of the catalyst **FBIP-O<sub>2</sub>CC<sub>3</sub>F<sub>7</sub>** the catalysis was performed with catalyst amounts from 0.25 to 2.00 mol%, while all other concentrations were kept constant.

The yield-time graph (Figure 2, *left*) shows a dependency of the reaction rate from the catalyst concentration. With higher loadings higher initial reaction rates are achieved (Figure 2, *right*). The initial reaction rates (Table 1) were calculated from the slope of the yield-time data for each test series.

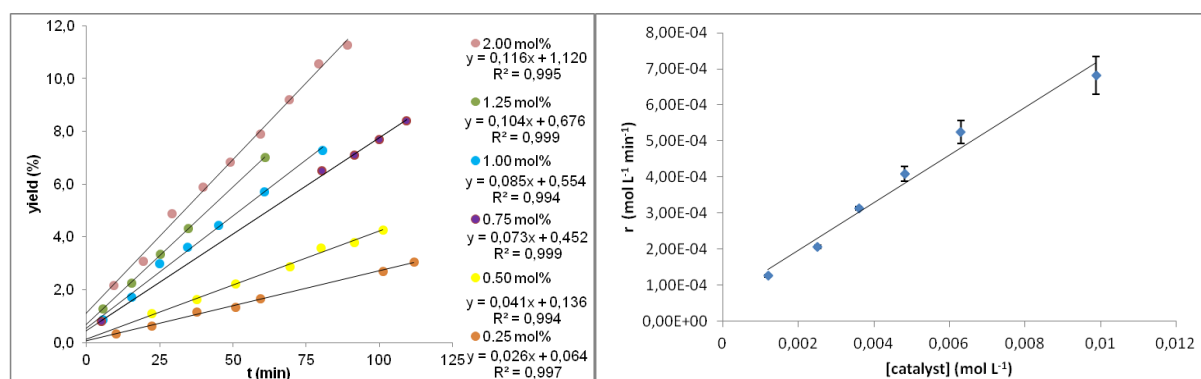

**Figure 2:** *Left:* Yield-time data for varying amounts of catalyst **FBIP-O<sub>2</sub>CC<sub>3</sub>F<sub>7</sub>**. *Right:* Dependency of the initial reaction rate from the catalyst concentration.

**Table 1:** Initial reaction rates for varying amounts of catalyst **FBIP-O<sub>2</sub>CC<sub>3</sub>F<sub>7</sub>**.

| # | <b>FBIP-O<sub>2</sub>CC<sub>3</sub>F<sub>7</sub></b><br>(mol%) | [catalyst]<br>(mmol L <sup>-1</sup> ) | <i>r</i><br>(mol L <sup>-1</sup> min <sup>-1</sup> ) |
|---|----------------------------------------------------------------|---------------------------------------|------------------------------------------------------|
| 1 | 0.25                                                           | 1.19                                  | $1.26 \cdot 10^{-4} \pm 3.78 \cdot 10^{-6}$          |
| 2 | 0.50                                                           | 2.51                                  | $2.05 \cdot 10^{-4} \pm 4.64 \cdot 10^{-6}$          |
| 3 | 0.75                                                           | 3.59                                  | $3.13 \cdot 10^{-4} \pm 4.96 \cdot 10^{-6}$          |
| 4 | 1.00                                                           | 4.81                                  | $4.09 \cdot 10^{-4} \pm 1.97 \cdot 10^{-5}$          |
| 5 | 1.25                                                           | 6.30                                  | $5.25 \cdot 10^{-4} \pm 3.13 \cdot 10^{-5}$          |
| 6 | 2.00                                                           | 9.88                                  | $6.82 \cdot 10^{-4} \pm 5.19 \cdot 10^{-5}$          |

Logarithmic transformation of the obtained reaction rate data results in a straight line with a slope of 0.84 (Figure 3, *left*) revealing a reaction order of **0.84** for the catalyst **FBIP-O<sub>2</sub>CC<sub>3</sub>F<sub>7</sub>** according to equation 3.

Extrapolation of the yield-time data to  $t_0 = 0$  min (y-axis intercepts in Figure 2, *left*) reveals a relationship between the extrapolated product yield at  $t_0 = 0$  min and the corresponding catalyst loading (Figure 3, *right*). The slope of the regression line (0.615) shows that 100 catalyst molecules have statistically already generated about 60 product molecules initially after addition of all reagents and reactants. The C–C bond formation thus occurs very rapidly with the bis-palladium catalyst.

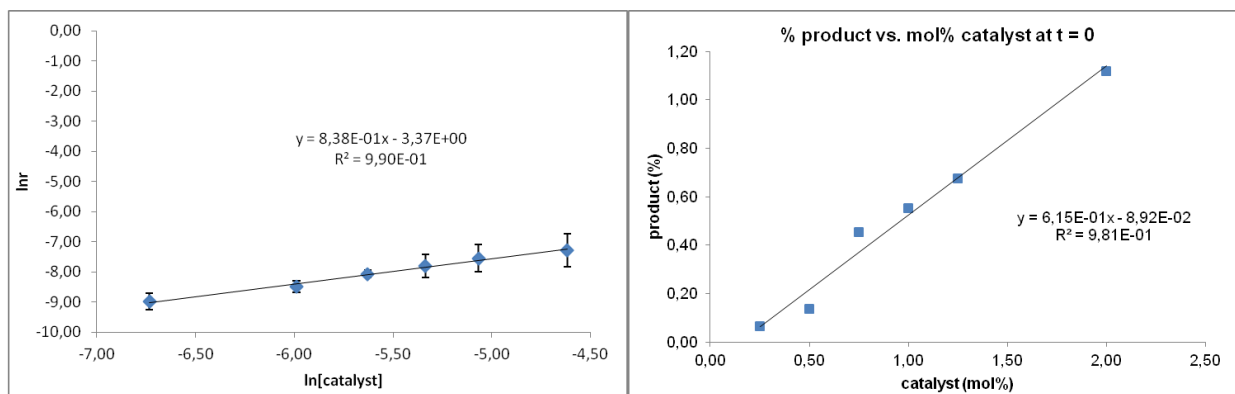

**Figure 3:** *Left:* Determination of the reaction order for the catalyst **FBIP-O<sub>2</sub>CC<sub>3</sub>F<sub>7</sub>**. *Right:* Dependency of the extrapolated product-yield data at  $t_0 = 0$  min on the catalyst loading.

*b) 0.25 to 1.25 mol% Catalyst and Reverse Substrate Addition*

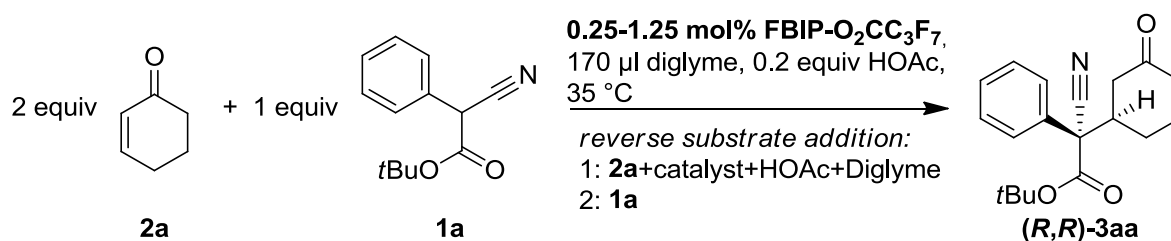

In the second series for the determination of the reaction order of the catalyst **FBIP-O<sub>2</sub>CC<sub>3</sub>F<sub>7</sub>** the catalysis was performed with catalyst amounts from 0.25 to 1.25 mol%, while all other concentrations were kept constant. A reverse addition order of the substrates was used. In these experiments the catalyst was first mixed with the enone **2a**, acetic acid and diglyme. The time measurement was started with the addition of the cyanoacetate **1a** in diglyme at 35 °C.

The yield-time graph (Figure 4, *left*) shows a dependency of the reaction rate from the catalyst concentration. With higher catalyst loadings higher initial reaction rates are achieved (Figure 4, *right*). The initial reaction rates (Table 2) were calculated from the slope of the yield-time data for each test series.

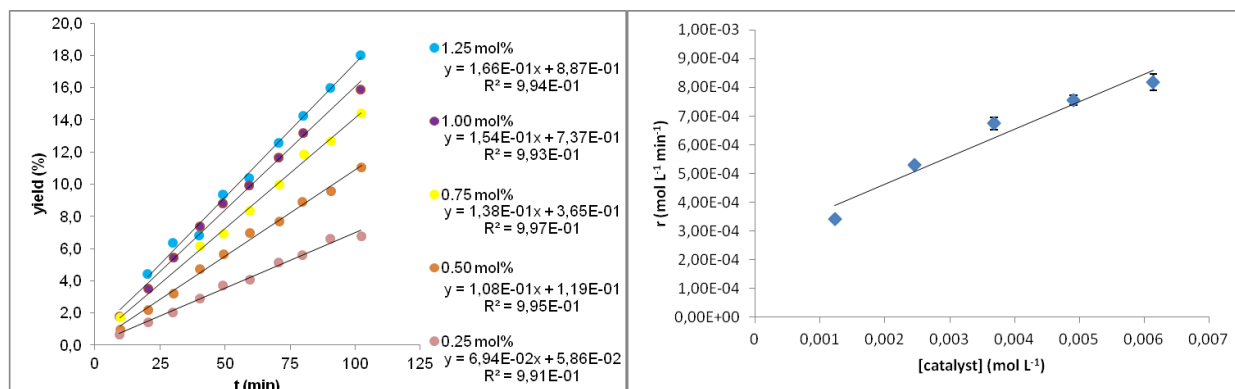

**Figure 4:** *Left:* Yield-time data for varying amounts of catalyst **FBIP-O<sub>2</sub>CC<sub>3</sub>F<sub>7</sub>** with reverse substrate addition. *Right:* Dependency of the initial reaction rate from the catalyst concentration with reverse substrate addition.



**Table 2: Initial reaction rates for varying amounts of catalyst FBIP-O<sub>2</sub>CC<sub>3</sub>F<sub>7</sub>.**

| # | FBIP-O <sub>2</sub> CC <sub>3</sub> F <sub>7</sub><br>(mol%) | [catalyst]<br>(mmol L <sup>-1</sup> ) | <i>r</i><br>(mol L <sup>-1</sup> min <sup>-1</sup> ) |
|---|--------------------------------------------------------------|---------------------------------------|------------------------------------------------------|
| 1 | 0.25                                                         | 1.23                                  | $3.41 \cdot 10^{-4} \pm 4.54 \cdot 10^{-6}$          |
| 2 | 0.50                                                         | 2.45                                  | $5.30 \cdot 10^{-4} \pm 8.32 \cdot 10^{-6}$          |
| 3 | 0.75                                                         | 3.68                                  | $6.75 \cdot 10^{-4} \pm 2.14 \cdot 10^{-5}$          |
| 4 | 1.00                                                         | 4.91                                  | $7.55 \cdot 10^{-4} \pm 1.66 \cdot 10^{-5}$          |
| 5 | 1.25                                                         | 6.14                                  | $8.17 \cdot 10^{-4} \pm 2.84 \cdot 10^{-5}$          |

Logarithmic transformation of the obtained reaction rate data results in a straight line with a slope of 0.55 (Figure 5, *left*) revealing under the reverse order of substrate addition a reaction order of **0.55** for the catalyst FBIP-O<sub>2</sub>CC<sub>3</sub>F<sub>7</sub>, corresponding to equation 3.

The graph of the extrapolated product-yield at *t*<sub>0</sub> = 0 min (y-axis intercepts in Figure 4, *left*) as function of the corresponding catalyst loadings results in a straight line with a slope of 0.91.

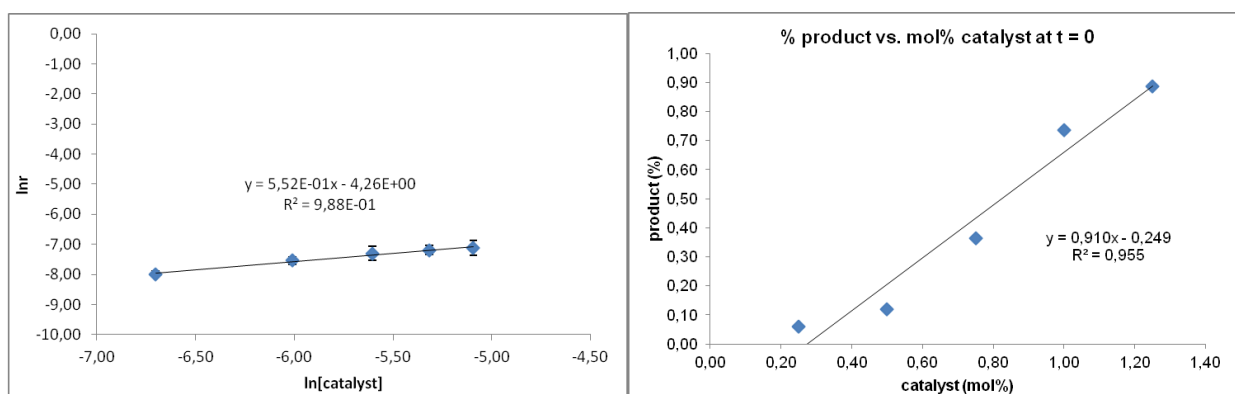

**Figure 5:** *Left:* Determination of the reaction order for the catalyst FBIP-O<sub>2</sub>CC<sub>3</sub>F<sub>7</sub> with reverse substrate addition. *Right:* Dependency of the extrapolated product-yield data at *t*<sub>0</sub> = 0 min on the catalyst loading of the experiments with reverse substrate addition.

## Reaction Order of Acetic Acid

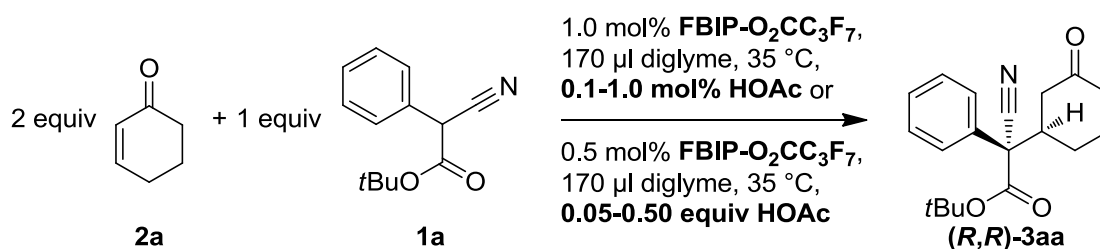

For the determination of the reaction order of acetic acid the catalysis was performed with a wide range of different acetic acid amounts. In one series acid amounts (0.10 to 1.00 mol%) smaller

and equal to the concentration of palladium were used, in another series larger amounts (0.05 to 0.50 equiv) were used to analyze a possible saturation effect, while all other concentrations were constant.

In case of  $[\text{HOAc}] \leq [\text{Pd}]$  the yield-time graph shows a very small dependency of the reaction rate from the acetic acid amount (Figure 6, *top*). Higher acid amounts resulted in slightly higher reaction rates. Nearly identical reaction rates were obtained for  $[\text{HOAc}] \gg [\text{Pd}]$  (Figure 6, *bottom*).

The initial reaction rates (Table 3) were calculated from the slope of the yield-time data for each test series.

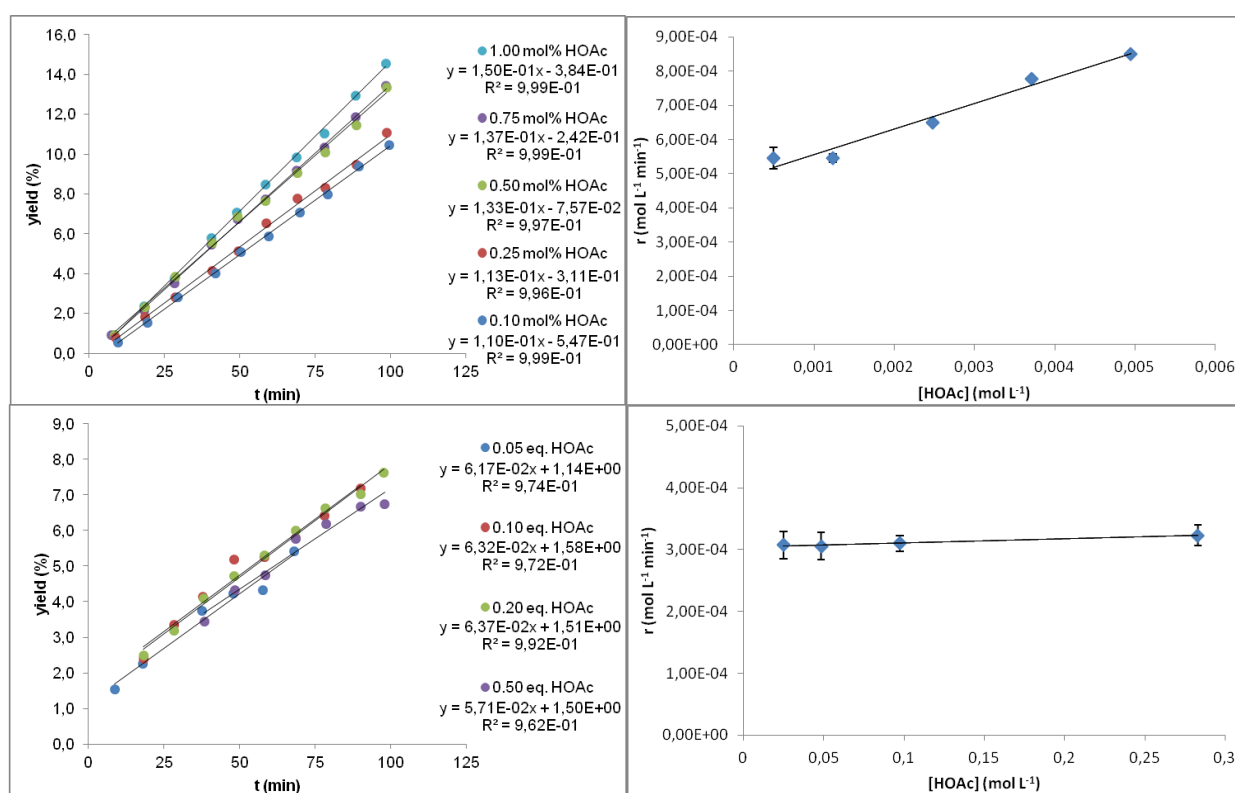

**Figure 6:** *Top:* Yield-time data and dependency of the initial reaction rate for varying amounts of HOAc, where  $[\text{HOAc}] \leq [\text{Pd}]$ . *Bottom:* Yield-time data and dependency of the initial reaction rate for varying amounts of HOAc, where  $[\text{HOAc}] \gg [\text{Pd}]$ .

**Table 3: Initial reaction rates for varying amounts of HOAc.**

| #              | HOAc<br>(mol%) | [HOAc]<br>(mol L <sup>-1</sup> ) | <i>r</i><br>(mol L <sup>-1</sup> min <sup>-1</sup> ) |
|----------------|----------------|----------------------------------|------------------------------------------------------|
| 1 <sup>a</sup> | 0.10           | 4.94·10 <sup>-4</sup>            | 5.46·10 <sup>-4</sup> ± 3.13·10 <sup>-5</sup>        |
| 2 <sup>a</sup> | 0.25           | 1.24·10 <sup>-3</sup>            | 5.46·10 <sup>-4</sup> ± 1.18·10 <sup>-5</sup>        |
| 3 <sup>a</sup> | 0.50           | 2.47·10 <sup>-3</sup>            | 6.48·10 <sup>-4</sup> ± 6.78·10 <sup>-6</sup>        |
| 4 <sup>a</sup> | 0.75           | 3.71·10 <sup>-3</sup>            | 7.78·10 <sup>-4</sup> ± 4.41·10 <sup>-6</sup>        |
| 5 <sup>a</sup> | 1.00           | 4.95·10 <sup>-3</sup>            | 8.50·10 <sup>-4</sup> ± 4.74·10 <sup>-6</sup>        |
| 6 <sup>b</sup> | 5.0            | 2.49·10 <sup>-2</sup>            | 3.08·10 <sup>-4</sup> ± 2.19·10 <sup>-5</sup>        |
| 7 <sup>b</sup> | 10             | 4.84·10 <sup>-2</sup>            | 3.06·10 <sup>-4</sup> ± 2.21·10 <sup>-5</sup>        |
| 8 <sup>b</sup> | 20             | 9.74·10 <sup>-2</sup>            | 3.10·10 <sup>-4</sup> ± 1.24·10 <sup>-5</sup>        |
| 9 <sup>b</sup> | 50             | 2.83·10 <sup>-1</sup>            | 3.23·10 <sup>-4</sup> ± 1.64·10 <sup>-5</sup>        |

<sup>a</sup> 1 mol% catalyst was used. <sup>b</sup> 0.5 mol% of catalyst was used.

The double reciprocal plot  $r^{-1}$  vs  $[\text{HOAc}]^{-1}$  of both test series is shown in Figure 7.

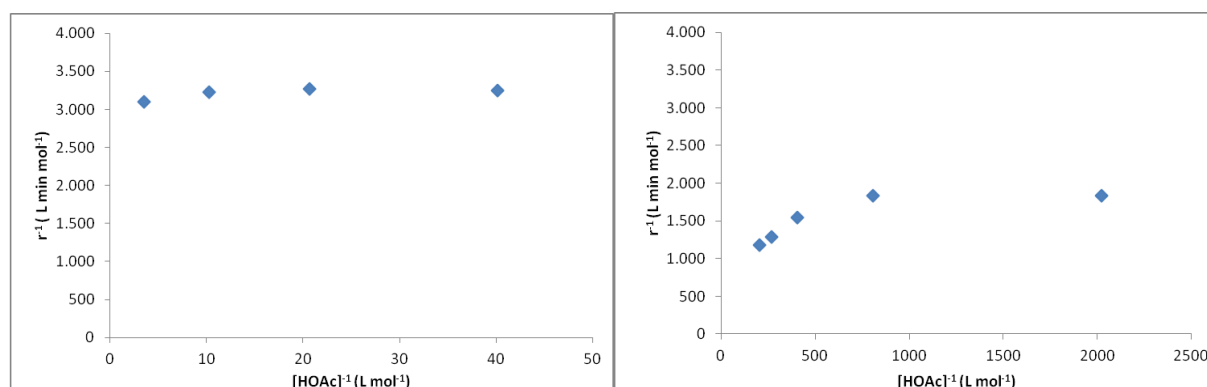

**Figure 7:** Double reciprocal plot  $r^{-1}$  vs  $[\text{HOAc}]^{-1}$  of the obtained data. *Left:*  $[\text{HOAc}] \gg [\text{Pd}]$ . *Right:*  $[\text{HOAc}] \leq [\text{Pd}]$ .

Logarithmic transformation of the obtained reaction rate data results in straight lines with a slope of 0.20 for  $[\text{HOAc}] \leq [\text{Pd}]$  (Figure 8, *left*) and 0.02 for  $[\text{HOAc}] \gg [\text{Pd}]$  (Figure 8, *right*). The zero order dependence only in case of  $[\text{HOAc}] \gg [\text{Pd}]$  implicates saturation kinetics for these high concentrations. According to equation 3 the reaction order of acetic acid is determined to be **0.20**.

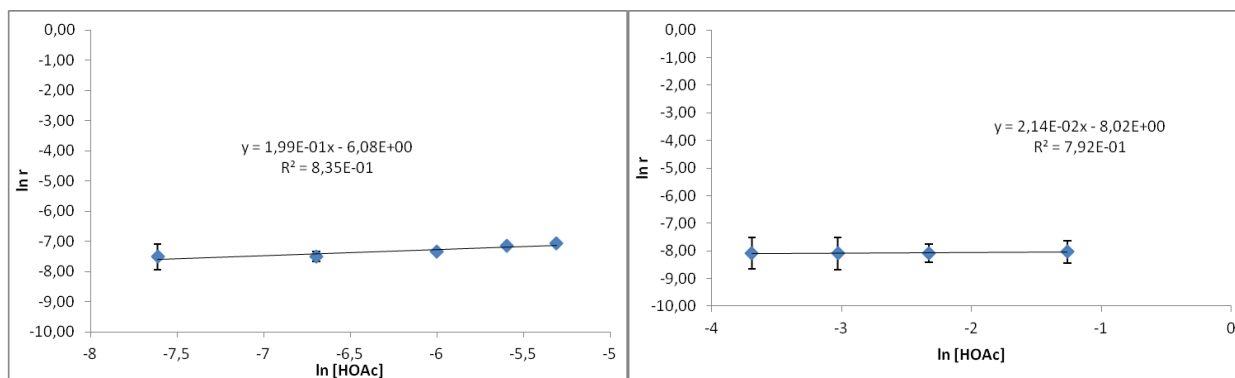

**Figure 8:** Determination of the reaction order for acetic acid. *Left:*  $[\text{HOAc}] \leq [\text{Pd}]$ . *Right:*  $[\text{HOAc}] \gg [\text{Pd}]$ .

## Influence of Substituted Benzoic Acids

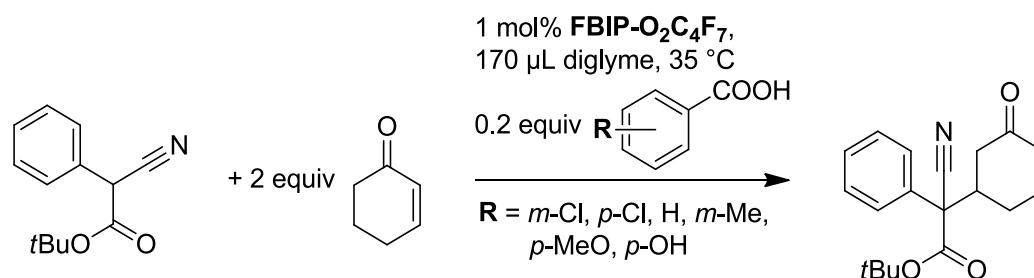

Different substituted benzoic acids were used as co-catalysts to test the influence of the acids' pKa values on the reaction outcome. Stock solutions of the corresponding acid in diglyme ( $c = 0.435 \text{ mol L}^{-1}$ ) were prepared and used instead of HOAc.

The yield-time data using 1 mol% of **FBIP-O<sub>2</sub>CC<sub>3</sub>F<sub>7</sub>** in diglyme at 35 °C show a dependency of the initial reaction rate on the substituent R of the benzoic acid derivative (Figure 9, *left*). The Hammett plot  $\log k$  vs  $\sigma$ -constant shows a correlation with a negative value for  $\rho$  ( $-0.41$ , Figure 9, *right*). The initial reaction rates (Table 4) were calculated from the slope of the yield-time data for each test series and further converted into the rate constants  $k$ .

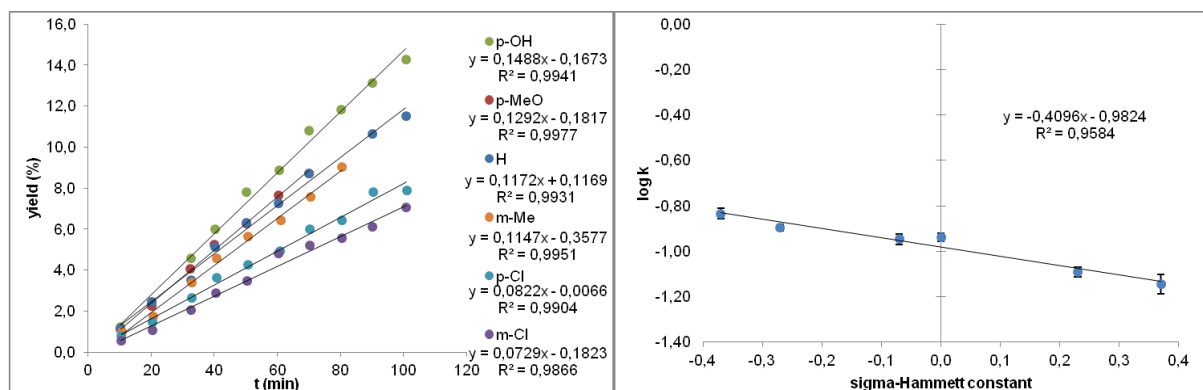

**Figure 9:** *Left:* Yield-time data for different substituted benzoic acid derivatives. *Right:* Hammett plot of the obtained data.

**Table 4: Initial reaction rates and rate constants for different substituted benzoic acid derivatives.**

| # | R             | $\sigma$ -constant | $r$<br>(mol L <sup>-1</sup> min <sup>-1</sup> ) | k<br>(L <sup>1.56</sup> mol <sup>-1.56</sup> min <sup>-1</sup> ) |
|---|---------------|--------------------|-------------------------------------------------|------------------------------------------------------------------|
| 1 | <i>m</i> -Cl  | 0.37               | $3.54 \cdot 10^{-4} \pm 1.32 \cdot 10^{-5}$     | $7.18 \cdot 10^{-2}$                                             |
| 2 | <i>p</i> -Cl  | 0.23               | $3.99 \cdot 10^{-4} \pm 8.33 \cdot 10^{-6}$     | $8.10 \cdot 10^{-2}$                                             |
| 3 | H             | 0                  | $5.69 \cdot 10^{-4} \pm 1.06 \cdot 10^{-5}$     | $1.15 \cdot 10^{-1}$                                             |
| 4 | <i>m</i> -Me  | -0.07              | $5.57 \cdot 10^{-4} \pm 1.37 \cdot 10^{-5}$     | $1.13 \cdot 10^{-1}$                                             |
| 5 | <i>p</i> -MeO | -0.27              | $6.27 \cdot 10^{-4} \pm 1.04 \cdot 10^{-5}$     | $1.27 \cdot 10^{-1}$                                             |
| 6 | <i>p</i> -OH  | -0.37              | $7.22 \cdot 10^{-4} \pm 1.94 \cdot 10^{-5}$     | $1.47 \cdot 10^{-1}$                                             |

The selectivity outcome after 24 h reaction time is shown in Table 5 and Figure 10.

**Table 5: Selectivity data of the catalysis reaction with various benzoic acid derivatives.**

| # | R             | $\sigma$ -constant | Yield<br>(%) | $ee_{(R,R)}$<br>(%) | $ee_{(S,R)}$<br>(%) | $dr_{(R,R+S,S):(S,R+R,S)}$ |
|---|---------------|--------------------|--------------|---------------------|---------------------|----------------------------|
| 1 | <i>m</i> -Cl  | 0.37               | 61           | 92                  | 66                  | 87:13                      |
| 2 | <i>p</i> -Cl  | 0.23               | 71           | 93                  | 72                  | 88:12                      |
| 3 | H             | 0                  | 77           | 94                  | 76                  | 90:10                      |
| 4 | <i>m</i> -Me  | -0.07              | 75           | 81                  | 74                  | 90:10                      |
| 5 | <i>p</i> -MeO | -0.27              | 75           | 94                  | 79                  | 90:10                      |
| 6 | <i>p</i> -OH  | -0.37              | 87           | 95                  | 78                  | 90:10                      |

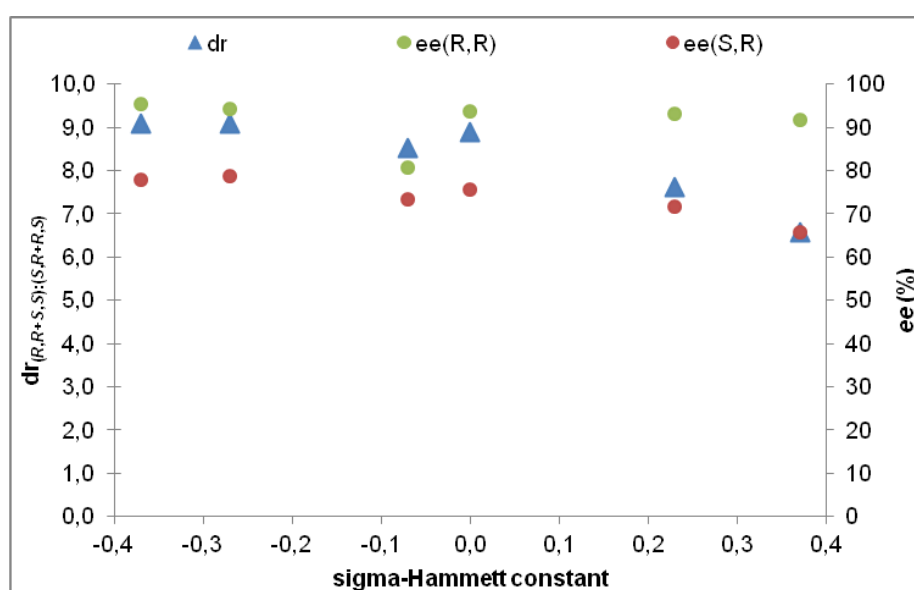

**Figure 10:** Effect of the electronic properties of the benzoic acid derivative on the selectivity (left axis:  $dr$ , right axis:  $ee$ ).

## Reaction Order of Enone **2a**

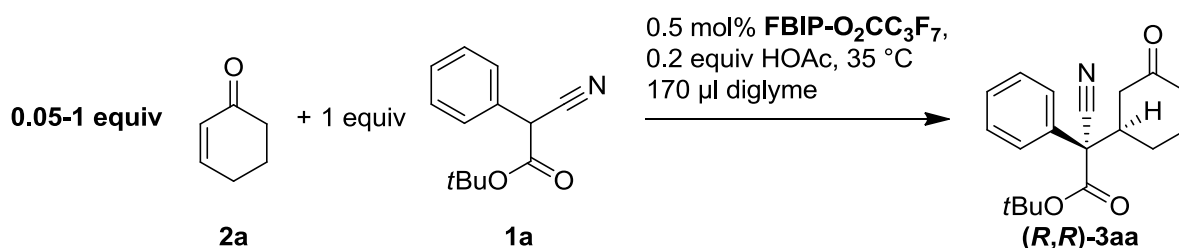

For the determination of the reaction order of the enone **2a** the catalysis was performed with amounts from 0.05 to 1.00 equiv of enone **2a**, while all other concentrations were kept constant. The yield-time data show a dependency of the initial reaction rate on the enone concentration (Figure 11, *left*). With higher concentrations the initial reaction rate increases (Figure 11, *right*). The following initial reaction rates (Table 6) were calculated from the slope of the yield-time data.

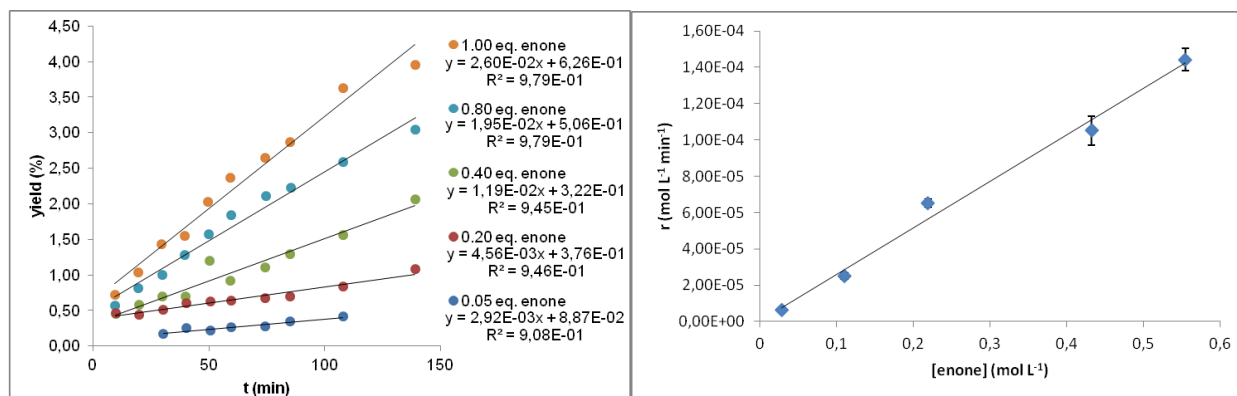

**Figure 11:** *Left:* Yield-time data for varying amounts of enone. *Right:* Plot of the initial reaction rates as a function of the enone concentration.

**Table 6: Initial reaction rates for varying amounts of enone **2a**.**

| # | Enone <b>2a</b><br>(equiv) | [ <b>2a</b> ]<br>(mol L <sup>-1</sup> ) | $r$<br>(mol L <sup>-1</sup> min <sup>-1</sup> ) |
|---|----------------------------|-----------------------------------------|-------------------------------------------------|
| 1 | 0.05                       | 0.028                                   | $6.33 \cdot 10^{-6} \pm 6.95 \cdot 10^{-7}$     |
| 2 | 0.20                       | 0.110                                   | $2.50 \cdot 10^{-5} \pm 1.75 \cdot 10^{-6}$     |
| 3 | 0.40                       | 0.219                                   | $6.53 \cdot 10^{-5} \pm 2.28 \cdot 10^{-6}$     |
| 4 | 0.80                       | 0.432                                   | $1.05 \cdot 10^{-4} \pm 8.04 \cdot 10^{-6}$     |
| 5 | 1.00                       | 0.554                                   | $1.44 \cdot 10^{-4} \pm 6.24 \cdot 10^{-6}$     |

Logarithmic transformation of the initial reaction rate data provides a straight line with a slope of 1.05 (Figure 12) revealing a reaction order of **1.05** for the enone, according to equation 3.

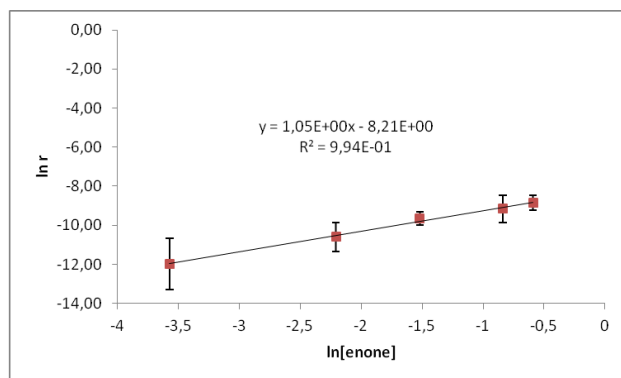

Figure 12: Determination of the reaction order for the enone.

### Reaction Order of $\alpha$ -Phenyl- $\alpha$ -cyanoacetate (**1a**)

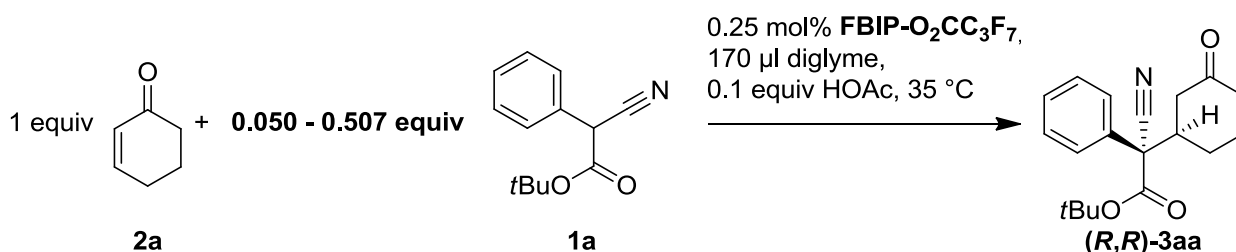

For the determination of the reaction order of  $\alpha$ -phenyl- $\alpha$ -cyanoacetate (**1a**) the catalysis was performed with  $\alpha$ -phenyl- $\alpha$ -cyanoacetate amounts from 0.050 to 0.507 equiv, while all other concentrations were kept constant. The yield-time data shows a dependency of the reaction rate from the cyanoacetate concentration (Figure 13, *left*). With higher cyanoacetate concentrations the reaction proceeds faster. The plot of the initial reaction rate against the cyanoacetate concentration shows a clear departure from a straight line implying a broken reaction order (Figure 13, *right*). The following initial reaction rates (Table 7) were calculated from the slope of the yield-time data.

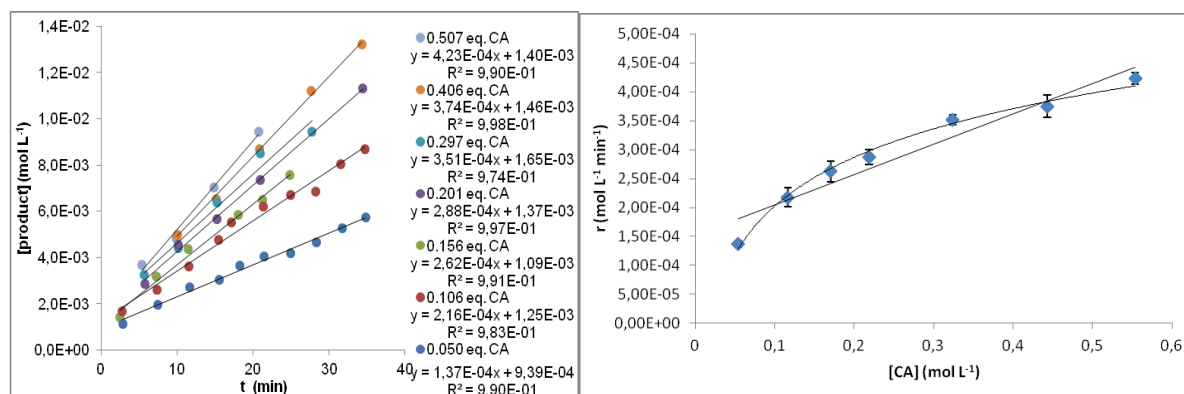

Figure 13: *Left*: Yield-time data for varying amounts of  $\alpha$ -phenyl- $\alpha$ -cyanoacetate. *Right*: Initial reaction rates as a function of the cyanoacetate concentration.

**Table 7: Initial reaction rates for varying amounts of  $\alpha$ -phenyl- $\alpha$ -cyanoacetate.**

| # | CA <b>1a</b><br>(equiv) | [ <b>1a</b> ]<br>(mol L <sup>-1</sup> ) | <i>r</i><br>(mol L <sup>-1</sup> min <sup>-1</sup> ) |
|---|-------------------------|-----------------------------------------|------------------------------------------------------|
| 1 | 0.050                   | 0.054                                   | $1.37 \cdot 10^{-4} \pm 5.97 \cdot 10^{-6}$          |
| 2 | 0.106                   | 0.116                                   | $2.17 \cdot 10^{-4} \pm 1.63 \cdot 10^{-5}$          |
| 3 | 0.156                   | 0.170                                   | $2.62 \cdot 10^{-4} \pm 1.81 \cdot 10^{-5}$          |
| 4 | 0.201                   | 0.219                                   | $2.88 \cdot 10^{-4} \pm 1.29 \cdot 10^{-5}$          |
| 5 | 0.297                   | 0.324                                   | $3.50 \cdot 10^{-4} \pm 8.41 \cdot 10^{-6}$          |
| 6 | 0.406                   | 0.443                                   | $3.75 \cdot 10^{-4} \pm 1.93 \cdot 10^{-5}$          |
| 7 | 0.507                   | 0.554                                   | $4.22 \cdot 10^{-4} \pm 1.03 \cdot 10^{-5}$          |

Logarithmic transformation of the initial reaction rate data results in a straight line with a slope of 0.47 (Figure 14) revealing a reaction order of **0.47** for the  $\alpha$ -phenyl- $\alpha$ -cyanoacetate, corresponding to equation 3.

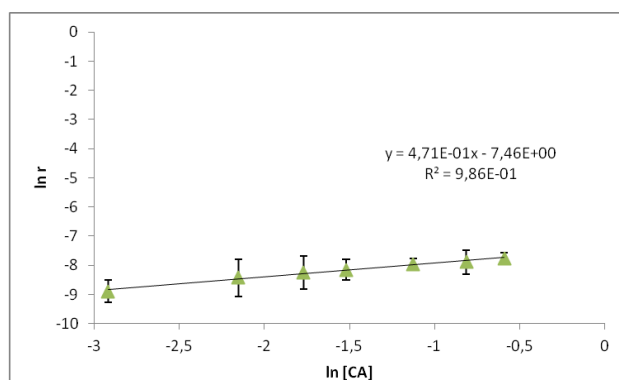

**Figure 14:** Determination of the reaction order for the  $\alpha$ -phenyl- $\alpha$ -cyanoacetate.

## Influence of Diglyme on the Reaction Rate and Stereoselectivity

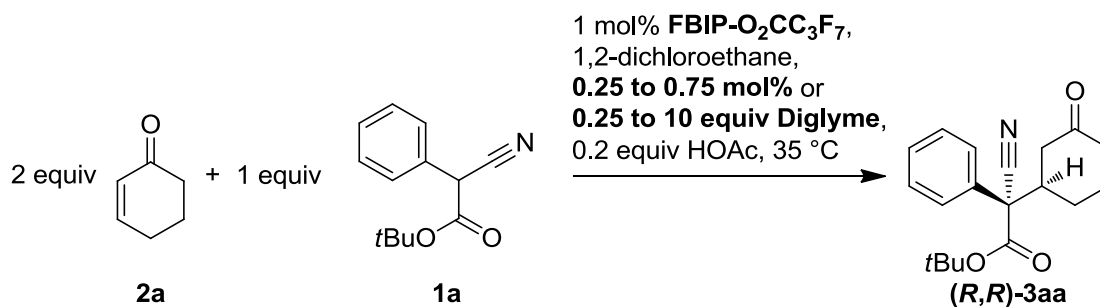

To investigate the influence of diglyme to the reaction rate of the catalysis reaction the experiments were performed in 1,2-dichloroethane with varying amounts of diglyme (0.25 to



0.75 mol% and 0.25 to 10 equiv of diglyme). The total reaction volume of each experiment was 170  $\mu\text{L}$  solvent mixture. For high diglyme amounts (2 to 10 equiv), the yield-time data show an accelerating effect of diglyme, while the lower concentrations have a lower influence on the reaction rate (Figure 15). The following initial reaction rates were calculated from the slope of the yield-time data (Table 8).

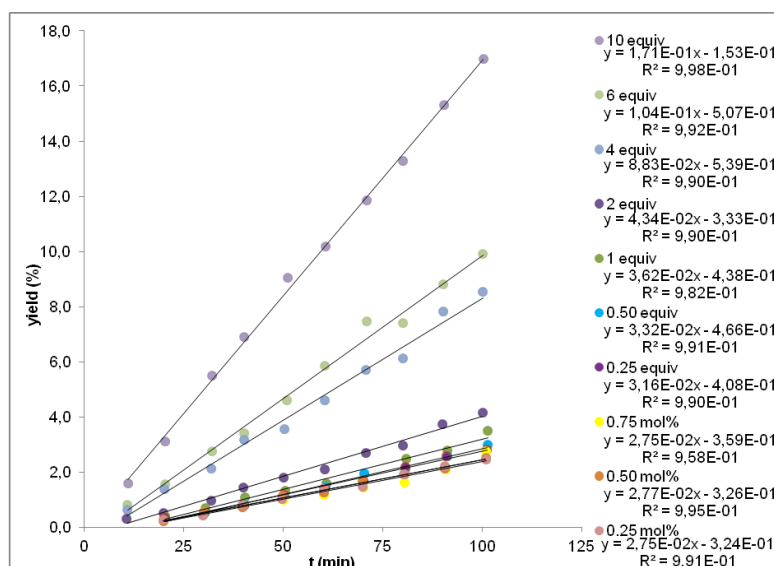

**Figure 15:** Yield-time data for varying amounts of diglyme.

**Table 8:** Initial reaction rates for varying amounts of diglyme.

| #  | Diglyme (equiv)     | Diglyme (vol%) | [Diglyme] ( $\text{mol L}^{-1}$ ) | $r$ ( $\text{mol L}^{-1} \text{min}^{-1}$ ) |
|----|---------------------|----------------|-----------------------------------|---------------------------------------------|
| 1  | $2.5 \cdot 10^{-3}$ | 0.02           | $1.24 \cdot 10^{-3}$              | $1.36 \cdot 10^{-4} \pm 6.61 \cdot 10^{-6}$ |
| 2  | $5.0 \cdot 10^{-3}$ | 0.04           | $2.47 \cdot 10^{-3}$              | $1.37 \cdot 10^{-4} \pm 7.14 \cdot 10^{-6}$ |
| 3  | $7.5 \cdot 10^{-3}$ | 0.06           | $3.71 \cdot 10^{-3}$              | $1.36 \cdot 10^{-4} \pm 6.30 \cdot 10^{-6}$ |
| 4  | 0.25                | 2.0            | $1.24 \cdot 10^{-1}$              | $1.56 \cdot 10^{-4} \pm 6.63 \cdot 10^{-6}$ |
| 5  | 0.5                 | 3.9            | $2.47 \cdot 10^{-1}$              | $1.64 \cdot 10^{-4} \pm 7.65 \cdot 10^{-6}$ |
| 6  | 1.0                 | 7.8            | $4.95 \cdot 10^{-1}$              | $1.79 \cdot 10^{-4} \pm 6.98 \cdot 10^{-6}$ |
| 7  | 2.0                 | 15.6           | $9.89 \cdot 10^{-1}$              | $2.14 \cdot 10^{-4} \pm 7.94 \cdot 10^{-6}$ |
| 8  | 4.0                 | 31.4           | 1.98                              | $4.37 \cdot 10^{-4} \pm 1.36 \cdot 10^{-5}$ |
| 9  | 6.0                 | 47.0           | 2.97                              | $5.12 \cdot 10^{-4} \pm 1.55 \cdot 10^{-5}$ |
| 10 | 10                  | 78.2           | 4.95                              | $8.44 \cdot 10^{-4} \pm 1.56 \cdot 10^{-5}$ |

The initial reaction rate as function of the diglyme concentration shows that there is a significant change of the initial reaction rate when higher amounts of diglyme are present (Figure 16). It is

most likely that diglyme facilitates the decomplexation of the product from the bis-palladium complex, also see “Derivation of the Theoretical Rate Law from the Proposed Mechanism”. Determination of the reaction order for diglyme under these reaction conditions results in a broken reaction order of **0.46**.

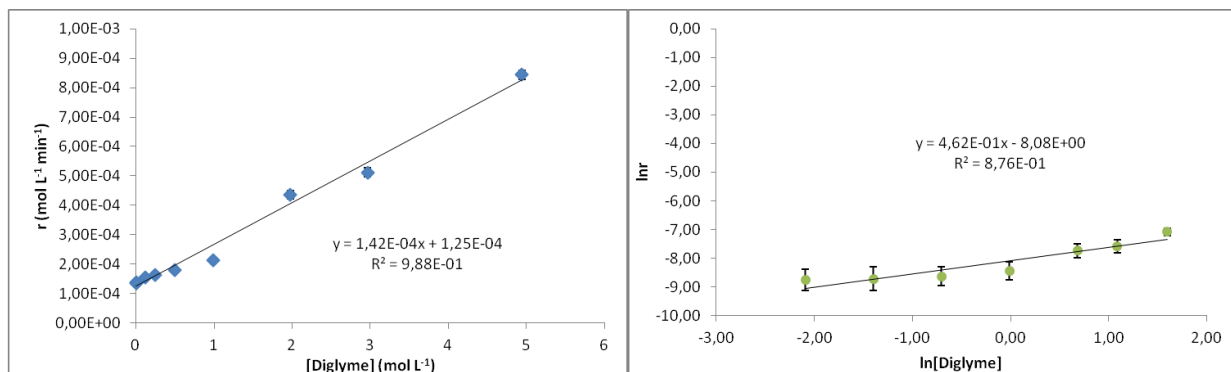

**Figure 16:** Initial reaction rates as a function of the diglyme concentration and the logarithmic data.

Besides the activity enhancing effect of diglyme as solvent it also has a crucial effect on the selectivity of the reaction. While the reaction in 1,2-dichloroethane proceeds only with low enantio- and diastereoselectivity, already 2 equiv of diglyme cause a drastic increase of the selectivity (Table 9).

**Table 9: Influence of diglyme on the selectivity.**

| # | Diglyme (equiv) | Diglyme (vol%) | $ee_{(R,R)}$ (%) | $ee_{(S,R)}$ (%) | $dr_{(R,R+S,S):(S,R+R,S)}$ |
|---|-----------------|----------------|------------------|------------------|----------------------------|
| 1 | -               | 0              | 36               | 48               | 62:38                      |
| 2 | 2.0             | 15.6           | 93               | 51               | 85:15                      |
| 3 | 4.0             | 31.4           | 97               | 76               | 90:10                      |
| 4 | 6.0             | 47.0           | 95               | 65               | 88:12                      |
| 5 | 10              | 78.2           | 96               | 76               | 89:11                      |
| 6 | -               | 100            | 94               | 65               | 89:11                      |

## Influence of MeCN on the Reaction Rate

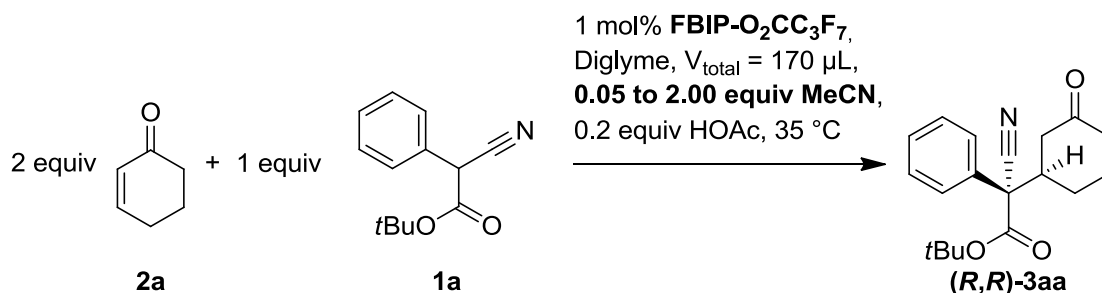

To investigate the influence of MeCN to the reaction rate of the catalysis reaction the experiments were performed in diglyme with varying amounts of MeCN (0.05 to 2.00 equiv of MeCN). The total reaction volume of each experiment was 170  $\mu\text{L}$  of the solvent mixture. The yield-time data shows a decrease of the initial reaction rate with increased MeCN amounts (Figure 17). The following initial reaction rates were calculated from the slope of the yield-time data (Table 10).

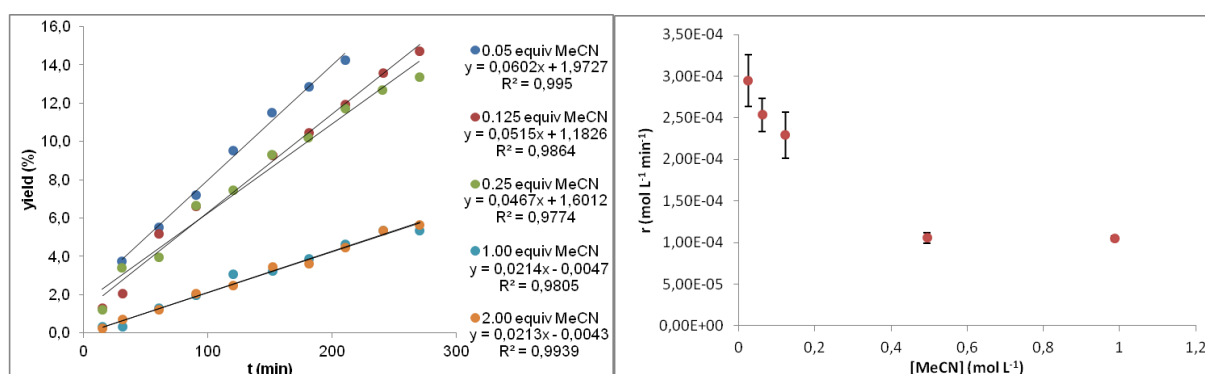

**Figure 17:** Yield-time data for varying amounts of MeCN and initial reaction rates as a function of the MeCN concentration.

**Table 10: Initial reaction rates for varying amounts of MeCN.**

| # | MeCN (equiv) | [MeCN] (mol L <sup>-1</sup> ) | <i>r</i> (mol L <sup>-1</sup> min <sup>-1</sup> ) |
|---|--------------|-------------------------------|---------------------------------------------------|
| 1 | 0.05         | $2.44 \cdot 10^{-2}$          | $2.94 \cdot 10^{-4} \pm 3.12 \cdot 10^{-5}$       |
| 2 | 0.125        | $6.16 \cdot 10^{-2}$          | $2.54 \cdot 10^{-4} \pm 1.98 \cdot 10^{-5}$       |
| 3 | 0.25         | $1.23 \cdot 10^{-1}$          | $2.29 \cdot 10^{-4} \pm 2.79 \cdot 10^{-5}$       |
| 4 | 1            | $4.95 \cdot 10^{-1}$          | $1.06 \cdot 10^{-4} \pm 6.37 \cdot 10^{-6}$       |
| 5 | 2            | $9.87 \cdot 10^{-1}$          | $1.05 \cdot 10^{-4} \pm 2.80 \cdot 10^{-6}$       |

Logarithmic transformation of the initial reaction rate data results in a straight line with a slope of  $-0.32$  (Figure 18) revealing a broken, negative reaction order of  $-0.32$  for MeCN under these reaction conditions.

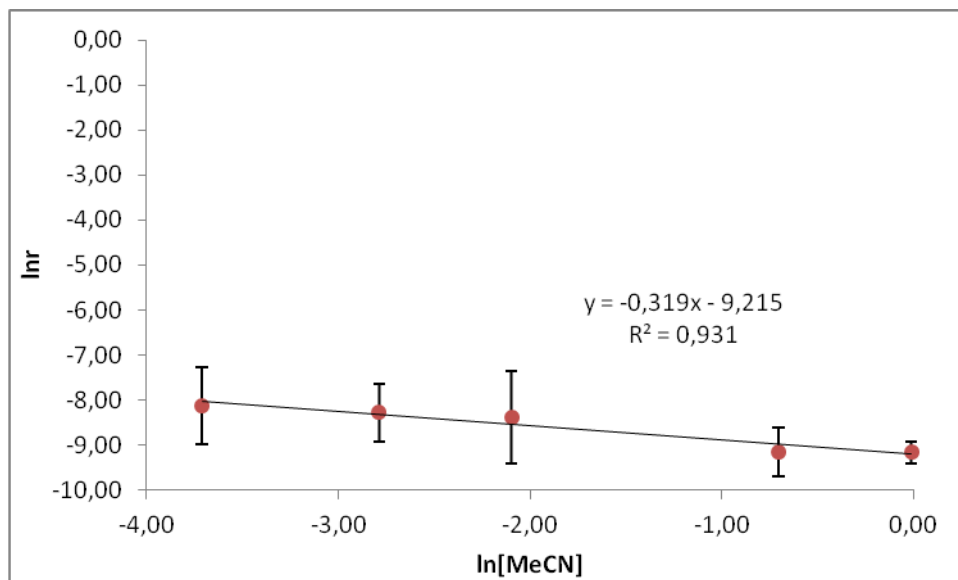

**Figure 18:** Determination of the reaction order of MeCN.

## Course of the Reaction

The investigation of the course of the reaction was performed to gain a detailed insight into the evolution of the enantio- and diastereoselectivity of the product formation. For this purpose the reaction was carried out according to GP3, yet on a larger scale with 0.46 mmol **1a** in 850  $\mu\text{L}$  of diglyme. For the analysis 25  $\mu\text{L}$  of the reaction mixture were added to 500  $\mu\text{L}$  acetonitrile to stop the reaction and release product and starting material from the catalyst. The sample was filtered over a short pad of silica to completely remove the catalyst. The filter cake was further washed with petrol ether: ethyl acetate (4:1). After removal of the solvent and an excess of enone **2a** the samples were analyzed by RP-HPLC and chiral stationary phase HPLC to determine yield, enantiomeric excess and diastereomeric ratio (Table 11).

**Table 11: Collected data during the reaction.**

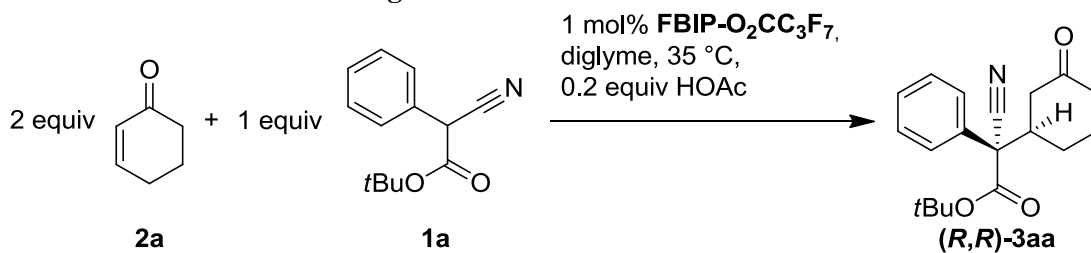

| #  | Time (min) | Conv. (%) | $ee_{(R,R)}$ (%) | $ee_{(S,R)}$ (%) | $dr_{(R,R+S,S)}$ :<br>$(S,R+R,S)$ |
|----|------------|-----------|------------------|------------------|-----------------------------------|
| 1  | 9.77       | 2.02      | 98               | 54               | 44.87:1                           |
| 2  | 54.62      | 8.94      | 99               | 61               | 21.37:1                           |
| 3  | 120.03     | 16.44     | 98               | 78               | 16.30:1                           |
| 4  | 174.32     | 21.83     | 99               | 73               | 13.34:1                           |
| 5  | 234.17     | 28.68     | 97               | 86               | 13.01:1                           |
| 6  | 298.17     | 33.68     | 95               | 83               | 14.90:1                           |
| 7  | 371.43     | 38.12     | 96               | 90               | 9.11:1                            |
| 8  | 420.88     | 43.42     | 95               | 79               | 8.31:1                            |
| 9  | 478.23     | 48.39     | 93               | 77               | 8.17:1                            |
| 10 | 538.8      | 50.37     | 95               | 75               | 8.35:1                            |
| 11 | 598.33     | 51.49     | 95               | 75               | 8.28:1                            |
| 12 | 20h        | >99       | 94               | 71               | 8.10:1                            |

The yield-time data shows a curve with slowly decreasing slope (Figure 19). The reaction was followed for nearly 10h to a yield of 51%.

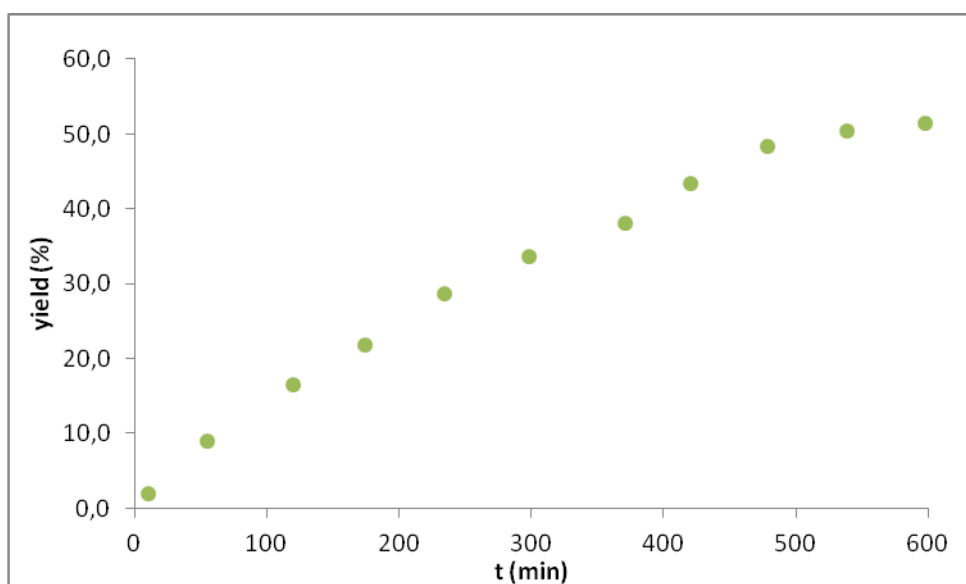

**Figure 19:** Time depending yields of the **FBIP-O<sub>2</sub>CC<sub>3</sub>F<sub>7</sub>** catalyzed reaction.

The development of the enantiomeric excess of the two diastereomers is shown in Figure 20. The major (*R,R*)-enantiomer is formed right from the beginning on with high enantioselectivity (Table 11, #1). The *ee* stays at a high value during the reaction. In contrast, the enantiomeric excess of the (*S,R*)-enantiomer is increasing in the first hours until it reaches its final value after around 5h.

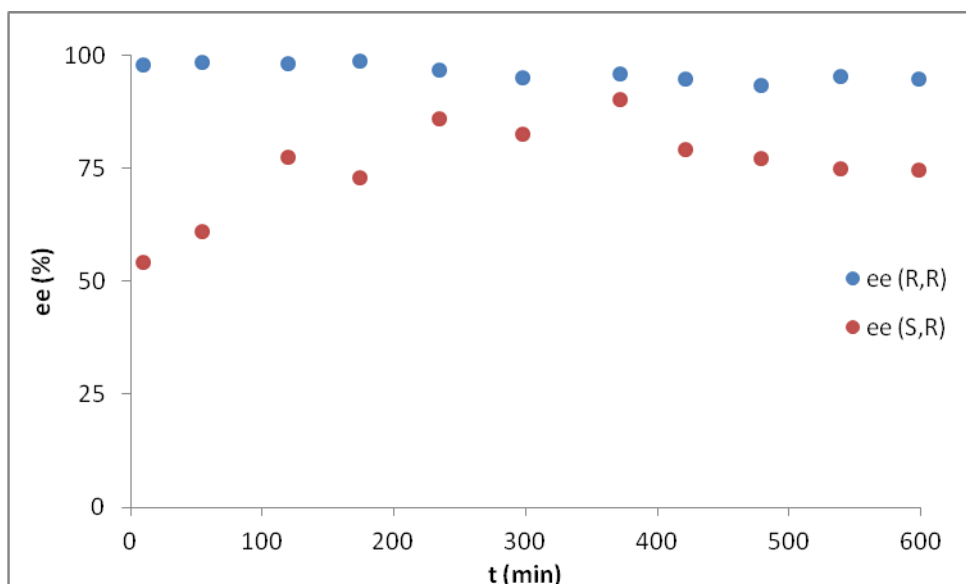

**Figure 20:** Development of the enantioselectivity of the **FBIP-O<sub>2</sub>CC<sub>3</sub>F<sub>7</sub>** catalyzed reaction.

The development of the diastereomeric excess is presented in Figure 21. The reaction starts with remarkably high diastereoselectivity for the desired diastereomer (Table 11, #1 & #2). With increasing reaction time the *dr* decreases until the final value is reached after approximately 7h.

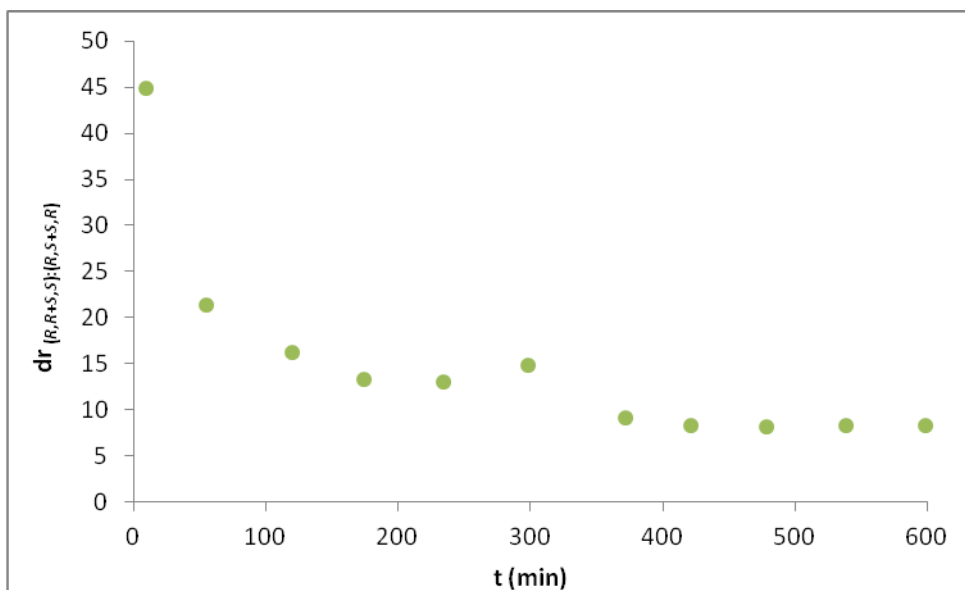

**Figure 21:** Development of the diastereomeric ratio of the **FBIP-O<sub>2</sub>CC<sub>3</sub>F<sub>7</sub>** catalyzed reaction.

## Derivation of the Theoretical Rate Law from the Proposed Mechanism

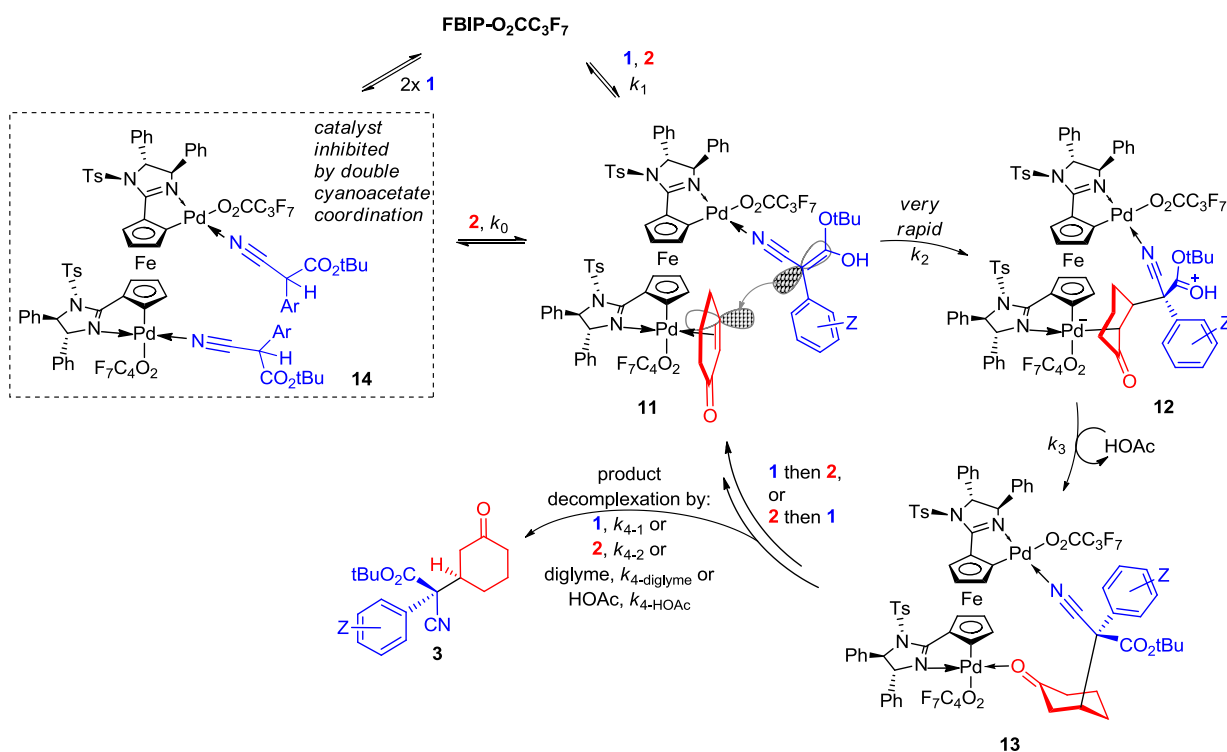

A theoretical rate law was derived from the proposed mechanism by application of steady state kinetics simplifications with nearly steady state concentrations of catalyst species **11-13** in the catalytic cycle, a rate limiting product decomplexation from **13** and an off-cycle catalyst reservoir **14** – that means two resting states **13** and **14**. The rate constants of each elementary

step are defined in Scheme 2.  $[\text{cat}_0]$  is the initial concentration of the activated catalyst, *i.e.* if two resting states are present, the following simplification is possible:  $[\mathbf{13}] + [\mathbf{14}] \approx [\text{cat}_0]$ ; and  $[\mathbf{13}] \approx [\text{cat}_0 - \mathbf{14}]$ .

Assumption of a rate limiting product decomplexation from **13** via an associative ligand exchange with **1**, **2**, HOAc or diglyme:

$$\frac{d[\mathbf{3}]}{dt} = [\mathbf{13}](k_{4-1}[\mathbf{1}] + k_{4-2}[\mathbf{2}] + k_{4\text{-diglyme}}[\text{diglyme}] + k_{4\text{-HOAc}}[\text{HOAc}])$$

Steady state concentration of compound **13**:

$$\frac{d[\mathbf{13}]}{dt} \approx 0 = -[\mathbf{13}](k_{4-1}[\mathbf{1}] + k_{4-2}[\mathbf{2}] + k_{4\text{-diglyme}}[\text{diglyme}] + k_{4\text{-HOAc}}[\text{HOAc}]) + k_3[\mathbf{12}][\text{HOAc}]$$

$$[\mathbf{13}] = \frac{k_3[\mathbf{12}][\text{HOAc}]}{k_{4-1}[\mathbf{1}] + k_{4-2}[\mathbf{2}] + k_{4\text{-diglyme}}[\text{diglyme}] + k_{4\text{-HOAc}}[\text{HOAc}]}$$

Steady state concentration of compound **12**:

$$\frac{d[\mathbf{12}]}{dt} \approx 0 = -k_3[\mathbf{12}][\text{HOAc}] + k_2[\mathbf{11}][\text{c}]$$

$$[\mathbf{12}] = \frac{k_2[\mathbf{11}]}{k_3[\text{HOAc}]}$$

Steady state concentration of compound **11**:

$$\frac{d[\mathbf{11}]}{dt} \approx 0 = k_1[\text{FBIP-O}_2\text{CC}_3\text{F}_7][\mathbf{1}][\mathbf{2}] - k_{-1}[\mathbf{11}] + k_0[\mathbf{2}][\mathbf{14}] - k_{-0}[\mathbf{11}][\mathbf{1}] - k_2[\mathbf{11}] + k_{4-1}[\mathbf{13}][\mathbf{1}] + k_{4-2}[\mathbf{13}][\mathbf{2}] + k_{4\text{-diglyme}}[\mathbf{13}][\text{diglyme}] + k_{4\text{-HOAc}}[\mathbf{13}][\text{HOAc}]$$

$$[\mathbf{11}] = \frac{k_1[\text{FBIP-O}_2\text{CC}_3\text{F}_7][\mathbf{1}][\mathbf{2}] + k_0[\mathbf{2}][\mathbf{14}] + k_{4-1}[\mathbf{13}][\mathbf{1}] + k_{4-2}[\mathbf{13}][\mathbf{2}]}{k_{-1} + k_{-0}[\mathbf{1}] + k_2} + \frac{k_{4\text{-diglyme}}[\mathbf{13}][\text{diglyme}] + k_{4\text{-HOAc}}[\mathbf{13}][\text{HOAc}]}{k_{-1} + k_{-0}[\mathbf{1}] + k_2}$$

Application of the steady state concentration of **13** results in the rate law:

$$\frac{d[\mathbf{3}]}{dt} = \frac{k_3[\mathbf{12}][\text{HOAc}](k_{4-1}[\mathbf{1}] + k_{4-2}[\mathbf{2}] + k_{4\text{-diglyme}}[\text{diglyme}] + k_{4\text{-HOAc}}[\text{HOAc}])}{k_{4-1}[\mathbf{1}] + k_{4-2}[\mathbf{2}] + k_{4\text{-diglyme}}[\text{diglyme}] + k_{4\text{-HOAc}}[\text{HOAc}]}$$

$$= k_3[\mathbf{12}][\text{HOAc}]$$

Substitution of **[12]** by the steady state concentration results in:



$$\frac{d[3]}{dt} = \frac{k_3 k_2 [11][HOAc]}{k_3 [HOAc]} = k_2 [11]$$

Application of the steady state concentration of **11** results in:

$$\frac{d[3]}{dt} = k_2 \frac{k_1 [FBIP-O_2CC_3F_7][1][2] + k_0 [2][14] + k_{4-1} [13][1] + k_{4-2} [13][2]}{k_{-1} + k_{-0}[1] + k_2} + k_2 \frac{k_{4-diglyme} [13][diglyme] + k_{4-HOAc} [13][HOAc]}{k_{-1} + k_{-0}[1] + k_2}$$

The assumption of two resting states **13** (rate limiting product-decomplexation) and **14** (off-cycle catalyst reservoir), and thus a very small concentration of **FBIP-O<sub>2</sub>CC<sub>3</sub>F<sub>7</sub>** results in following empirical rate law:

$$\frac{d[3]}{dt} = k_2 \frac{k_0 [2][14] + k_{4-1} [13][1] + k_{4-2} [13][2] + k_{4-diglyme} [13][diglyme] + k_{4-HOAc} [13][HOAc]}{k_{-1} + k_{-0}[1] + k_2}$$

$$\frac{d[3]}{dt} = k_2 \frac{k_0 [2][14] + [cat_0 - 14](k_{4-1} [1] + k_{4-2} [2] + k_{4-diglyme} [diglyme] + k_{4-HOAc} [HOAc])}{k_{-1} + k_{-0}[1] + k_2}$$

The cyanoacetate **1** thus shows a broken reaction order and the reaction rate also depends on diglyme and acetic acid which might facilitate product decomplexation.

The derived reaction orders in the theoretical rate law are thus in good agreement to the empirical orders:

$$\frac{d[3]}{dt} = k \cdot [FBIP-O_2CC_3F_7]^{0.84} \cdot [1]^{1.05} \cdot [2]^{0.47} \cdot [HOAc]^{0.20} \cdot [diglyme]^{0.46}$$

## Kinetic Investigations of the FIP Catalyzed Asymmetric Michael-Addition

### Reaction Order of the Catalyst $\text{FIP-O}_2\text{CC}_3\text{F}_7$

The determination of the reaction order of the catalyst  $\text{FIP-O}_2\text{CC}_3\text{F}_7$  was done in four slightly different series:

- normal procedure as mentioned above with 0.10 to 1.25 mol% catalyst,
- use of 0.10 to 1.25 mol% catalyst with additional 5 equiv MeCN per catalyst molecule,
- 0.50 to 1.50 mol% catalyst with reverse substrate addition (cyanoacetate **1a** is added as final component),
- use of 0.10 to 1.00 mol% of the dimeric catalyst under normal conditions.

All four series gave similar results, which are presented in detail in the following section.

#### a) Normal Procedure with 0.10 to 1.25 mol% Catalyst

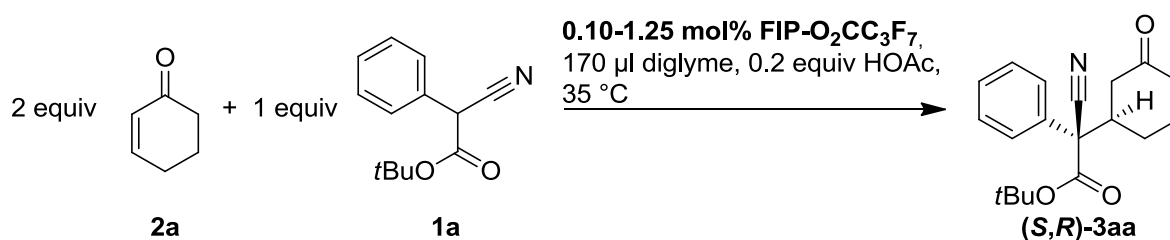

In the first series the reaction order of the catalyst  $\text{FIP-O}_2\text{CC}_3\text{F}_7$  was determined with catalyst amounts from 0.10 to 1.25 mol%, while the concentrations of all other components were kept constant.

The yield-time graph (Figure 22, *left*) shows that almost identical reaction rates are observed for the tested catalyst concentrations. With higher loadings only slightly increased initial reaction rates have been noticed (Figure 22, *right*). The initial reaction rates (Table 12) were calculated from the slope of the yield-time data for each series.

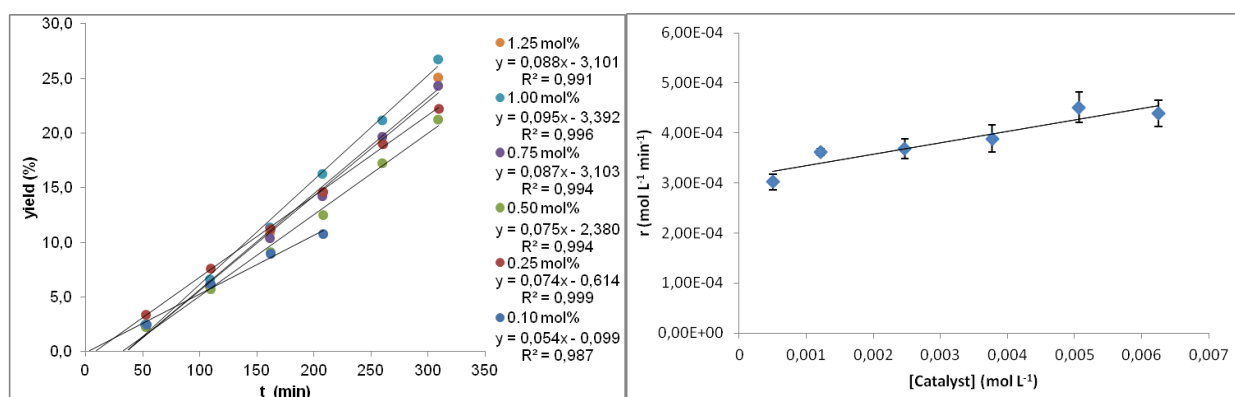

**Figure 22:** *Left:* Yield-time data for varying amounts of catalyst **FIP-O<sub>2</sub>CC<sub>3</sub>F<sub>7</sub>**. *Right:* Dependency of the initial reaction rate from the catalyst concentration.

**Table 12:** Initial reaction rates for varying amounts of catalyst **FIP-O<sub>2</sub>CC<sub>3</sub>F<sub>7</sub>**.

| # | <b>FIP-O<sub>2</sub>CC<sub>3</sub>F<sub>7</sub></b><br>(mol%) | [catalyst]<br>(mmol L <sup>-1</sup> ) | <i>r</i><br>(mol L <sup>-1</sup> min <sup>-1</sup> ) |
|---|---------------------------------------------------------------|---------------------------------------|------------------------------------------------------|
| 1 | 0.10                                                          | 0.50                                  | $3.02 \cdot 10^{-4} \pm 1.51 \cdot 10^{-5}$          |
| 2 | 0.25                                                          | 1.22                                  | $3.62 \cdot 10^{-4} \pm 6.66 \cdot 10^{-6}$          |
| 3 | 0.50                                                          | 2.47                                  | $3.68 \cdot 10^{-4} \pm 1.96 \cdot 10^{-5}$          |
| 4 | 0.75                                                          | 3.77                                  | $3.89 \cdot 10^{-4} \pm 2.69 \cdot 10^{-5}$          |
| 5 | 1.00                                                          | 5.07                                  | $4.51 \cdot 10^{-4} \pm 3.11 \cdot 10^{-5}$          |
| 6 | 1.25                                                          | 6.25                                  | $4.39 \cdot 10^{-4} \pm 2.65 \cdot 10^{-5}$          |

Logarithmic transformation of the obtained reaction rate data results in a straight line with a slope of 0.15 (Figure 23, *left*) revealing a reaction order of **0.15** for the catalyst **FIP-O<sub>2</sub>CC<sub>3</sub>F<sub>7</sub>**, according to equation 3.

Extrapolation of the yield-time data to  $t_0 = 0$  min (y-axis intercepts in Figure 22, *left*) results in the following plot of the product yield at  $t_0 = 0$  min and the corresponding catalyst loading (Figure 23, *right*). The negative values indicate an induction period.

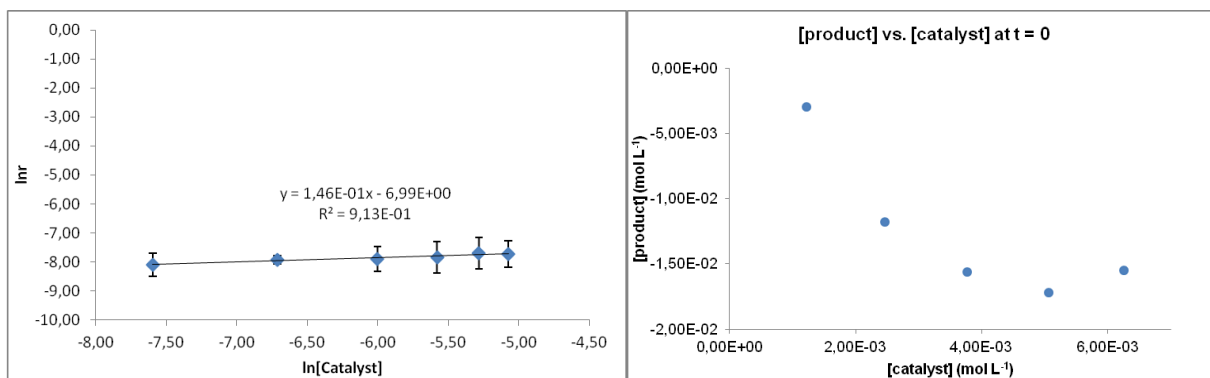

**Figure 23:** *Left:* Determination of the reaction order for the catalyst **FIP-O<sub>2</sub>CC<sub>3</sub>F<sub>7</sub>**. *Right:* Dependency of the extrapolated product-yield data at  $t_0 = 0$  min on the catalyst loading.

*b) Use of 0.10 to 1.25 mol% Catalyst and Additional 5 equiv MeCN per Catalyst*

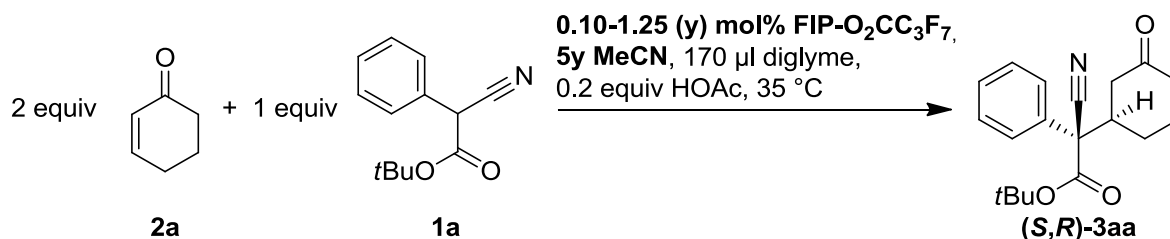

The second series was performed with catalyst amounts from 0.10 to 1.25 mol% in the presence of additional 5 equiv MeCN per catalyst molecule, while all other concentrations were kept constant. MeCN was investigated as an additive to avoid dimerization of the catalyst.

The yield-time graph (Figure 24, *left*) again shows that almost identical reaction rates are observed for the tested catalyst concentrations. With higher loadings only slightly increased initial reaction rates are achieved (Figure 24, *right*). The initial reaction rates (Table 13) were calculated from the slope of the yield-time data for each test series.

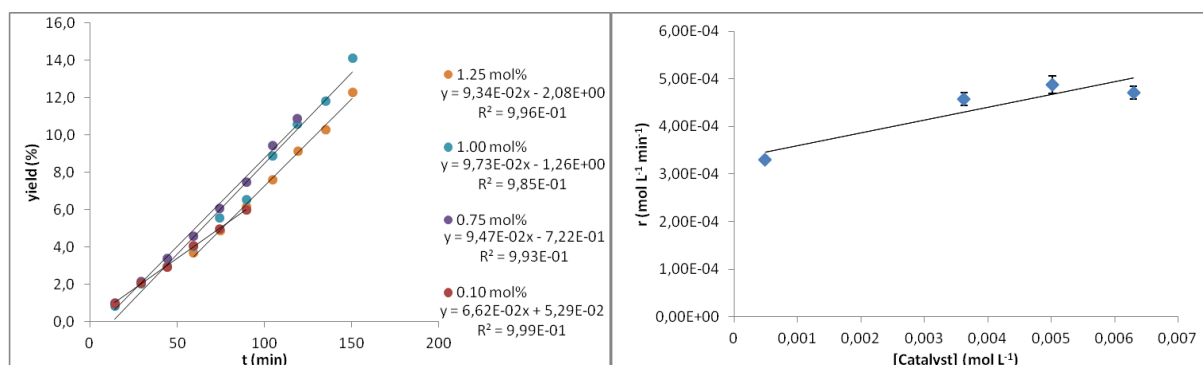

**Figure 24:** *Left:* Yield-time data for varying amounts of catalyst **FIP-O<sub>2</sub>CC<sub>3</sub>F<sub>7</sub>** with additional MeCN. *Right:* Dependency of the initial reaction rate from the catalyst concentration.



The yield-time graph (Figure 26, *left*) shows that almost identical reaction rates are observed for the tested catalyst concentrations also with reverse order of substrate addition. With higher loadings only slightly increased initial reaction rates are achieved (Figure 26, *right*). The initial reaction rates (Table 14) were calculated from the slope of the yield-time data for each test series.

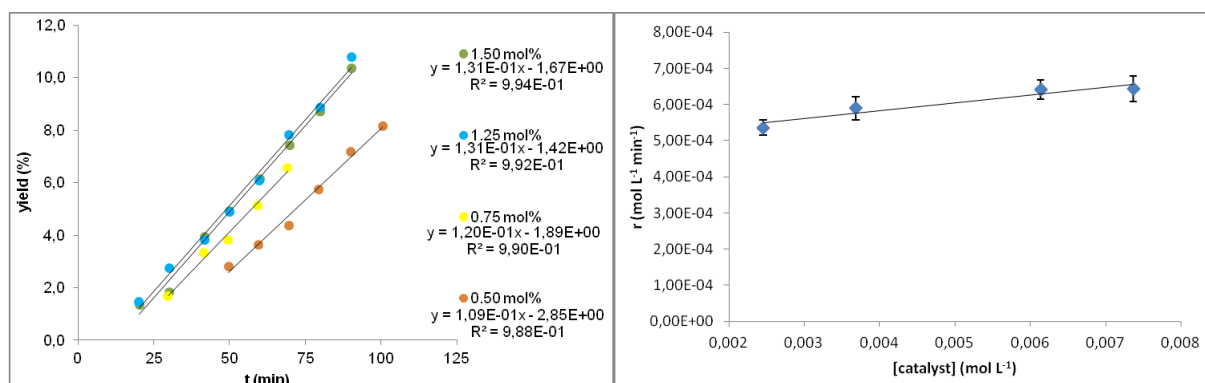

**Figure 26:** *Left:* Yield-time data for varying amounts of catalyst **FIP-O<sub>2</sub>CC<sub>3</sub>F<sub>7</sub>** with reverse addition order of the substrates. *Right:* Dependency of the initial reaction rate from the catalyst concentration.

**Table 14: Initial reaction rates for varying amounts of catalyst **FIP-O<sub>2</sub>CC<sub>3</sub>F<sub>7</sub>**.**

| # | <b>FIP-O<sub>2</sub>CC<sub>3</sub>F<sub>7</sub></b><br>(mol%) | [catalyst]<br>(mmol L <sup>-1</sup> ) | <i>r</i><br>(mol L <sup>-1</sup> min <sup>-1</sup> ) |
|---|---------------------------------------------------------------|---------------------------------------|------------------------------------------------------|
| 1 | 0.50                                                          | 2.45                                  | $5.36 \cdot 10^{-4} \pm 2.07 \cdot 10^{-5}$          |
| 2 | 0.75                                                          | 3.68                                  | $5.90 \cdot 10^{-4} \pm 3.12 \cdot 10^{-5}$          |
| 3 | 1.25                                                          | 6.14                                  | $6.42 \cdot 10^{-4} \pm 2.61 \cdot 10^{-5}$          |
| 4 | 1.50                                                          | 7.36                                  | $6.44 \cdot 10^{-4} \pm 3.45 \cdot 10^{-5}$          |

Logarithmic transformation of the obtained reaction rate data results in a straight line with a slope of 0.17 (Figure 27, *left*) revealing a reaction order of **0.17** for the catalyst **FIP-O<sub>2</sub>CC<sub>3</sub>F<sub>7</sub>**, in agreement to equation 3.

Extrapolation of the yield-time data to  $t_0 = 0$  min (y-axis intercepts in Figure 26, *left*) results in the following plot of the product yield at  $t_0 = 0$  min and the corresponding catalyst loading (Figure 27, *right*). The negative values indicate an induction period.

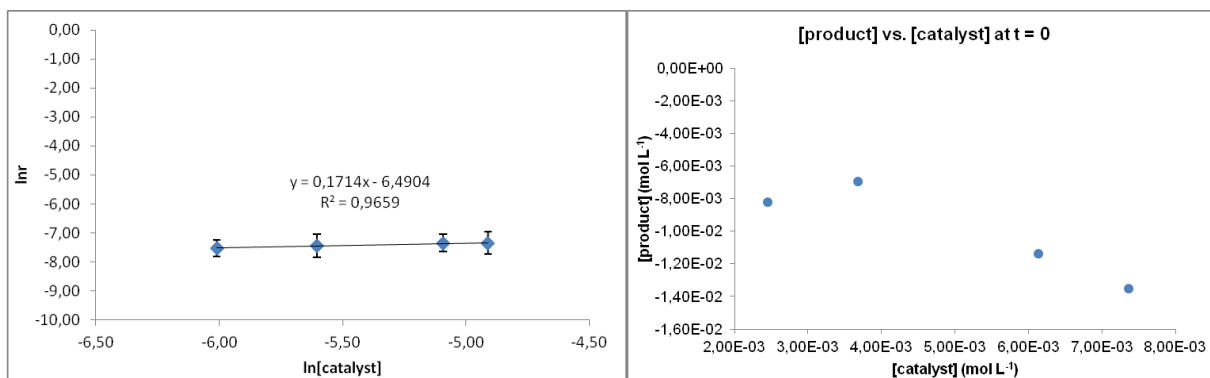

**Figure 27:** *Left:* Determination of the reaction order for the catalyst **FIP-O<sub>2</sub>CC<sub>3</sub>F<sub>7</sub>** with reverse addition order of the substrates. *Right:* Dependency of the extrapolated product-yield data at  $t_0 = 0$  min on the catalyst loading.

d) Use of 0.10 to 1.00 mol% of Dimeric Catalyst

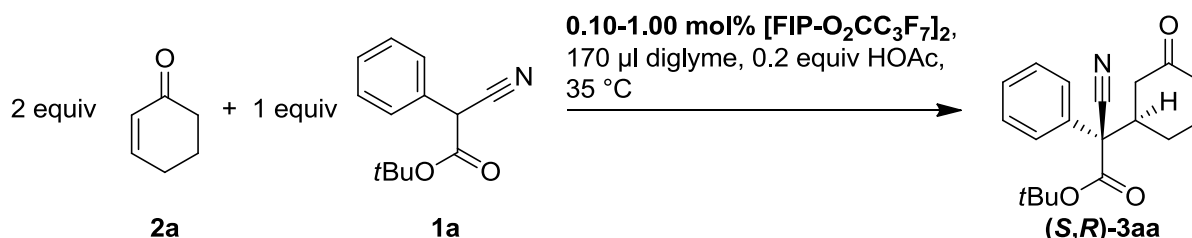

The fourth series was performed with catalyst amounts from 0.10 to 1.00 mol%, while all other concentrations were kept constant. Activation of the catalyst was done in the absence of acetonitrile to form a dimeric catalyst species **[FIP-O<sub>2</sub>CC<sub>3</sub>F<sub>7</sub>]<sub>2</sub>**. The catalysis was performed following the general procedure.

The yield-time graph (Figure 28, *left*) shows that similar reaction rates are observed for the tested catalyst concentrations. With higher loadings only slightly increased initial reaction rates have been noticed (Figure 28, *right*). The initial reaction rates (Table 15) were calculated from the slope of the yield-time data for each test series.

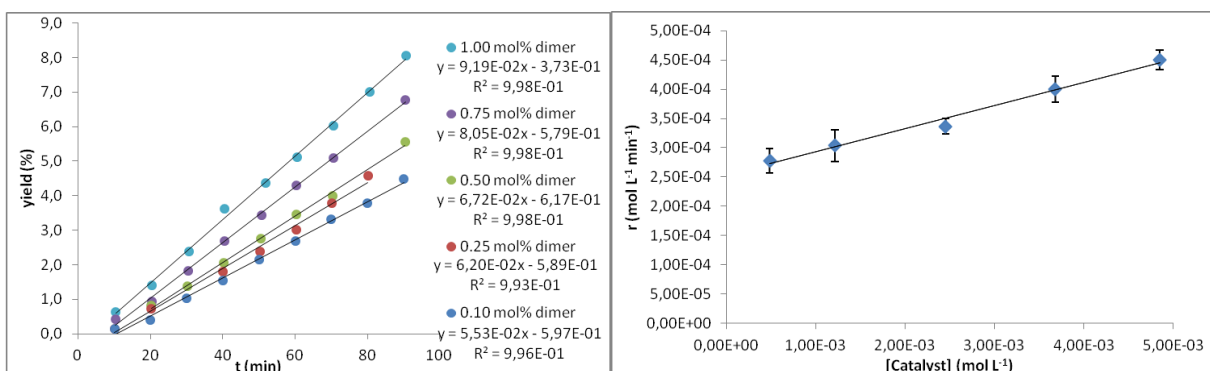

**Figure 28:** *Left:* Yield-time data for varying amounts of dimeric catalyst **[FIP-O<sub>2</sub>CC<sub>3</sub>F<sub>7</sub>]<sub>2</sub>**. *Right:* Dependency of the initial reaction rate from the catalyst concentration.

**Table 15: Initial reaction rates for varying amounts of catalyst [FIP-O<sub>2</sub>CC<sub>3</sub>F<sub>7</sub>]<sub>2</sub>.**

| # | FIP-O <sub>2</sub> CC <sub>3</sub> F <sub>7</sub><br>(mol%) | [catalyst]<br>(mmol L <sup>-1</sup> ) | <i>r</i><br>(mol L <sup>-1</sup> min <sup>-1</sup> ) |
|---|-------------------------------------------------------------|---------------------------------------|------------------------------------------------------|
| 1 | 0.10                                                        | 0.49                                  | 2.78·10 <sup>-4</sup> ± 2.12·10 <sup>-5</sup>        |
| 2 | 0.25                                                        | 1.22                                  | 3.04·10 <sup>-4</sup> ± 2.69·10 <sup>-5</sup>        |
| 3 | 0.50                                                        | 2.45                                  | 3.37·10 <sup>-4</sup> ± 1.36·10 <sup>-5</sup>        |
| 4 | 0.75                                                        | 3.68                                  | 4.00·10 <sup>-4</sup> ± 2.19·10 <sup>-5</sup>        |
| 5 | 1.00                                                        | 4.50                                  | 4.50·10 <sup>-4</sup> ± 1.63·10 <sup>-5</sup>        |

Logarithmic transformation of the obtained reaction rate data results in a straight line with a slope of 0.20 (Figure 29, *left*) revealing a reaction order of **0.20** for the dimeric catalyst [FIP-O<sub>2</sub>CC<sub>3</sub>F<sub>7</sub>]<sub>2</sub>, according to equation 3.

Extrapolation of the yield-time data to *t*<sub>0</sub> = 0 min (y-axis intercepts in Figure 28, *left*) results in the following plot of the product yield at *t*<sub>0</sub> = 0 min and the corresponding catalyst loading (Figure 29, *right*). The negative values indicate an induction period.

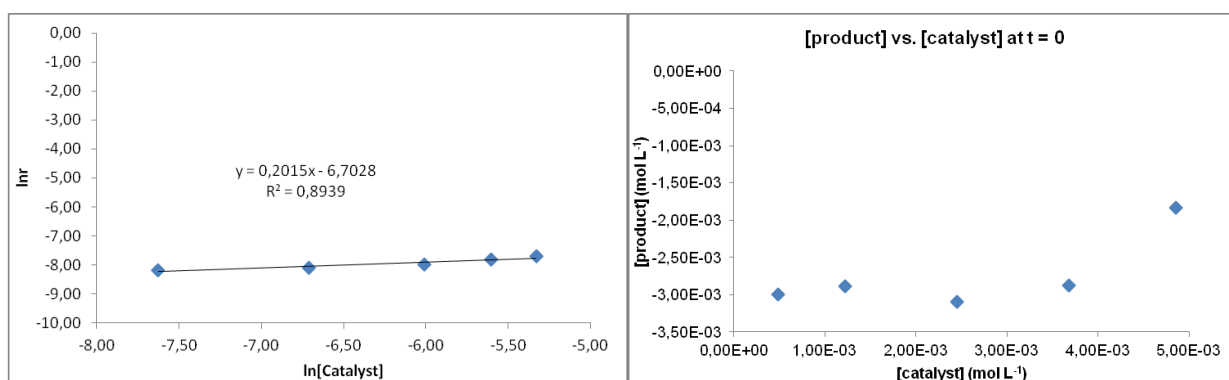

**Figure 29:** *Left:* Determination of the reaction order for the dimeric catalyst [FIP-O<sub>2</sub>CC<sub>3</sub>F<sub>7</sub>]<sub>2</sub>. *Right:* Dependency of the extrapolated product-yield data at *t*<sub>0</sub> = 0 min on the catalyst loading.

#### *Summary of the Determination of the Reaction Order for the Catalyst FIP-O<sub>2</sub>CC<sub>3</sub>F<sub>7</sub>*

All four series have provided the same result. Under all tested reaction conditions the reaction order of the catalyst FIP-O<sub>2</sub>CC<sub>3</sub>F<sub>7</sub> is broken ranging from **0.15** to **0.20**. The very similar initial reaction rates of all experiments (*Left*) and the corresponding logarithmic data (*Right*) for the determination of the reaction order are shown together in Figure 30.



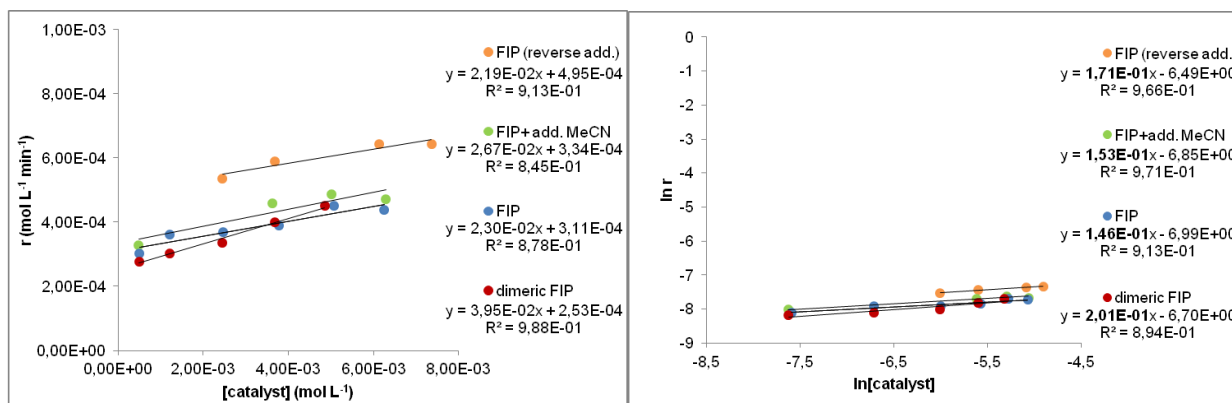

**Figure 30:** *Left:* Initial reaction rates of the four kinetic series with varying amounts of catalyst. *Right:* Logarithmic initial reaction rates for the determination of the reaction rate of the catalyst **FIP-O<sub>2</sub>CC<sub>3</sub>F<sub>7</sub>**.

In all four series an induction period is observed, which could not be suppressed by changing the reaction conditions (additional MeCN, reverse addition order of the substrates or a MeCN free, dimeric catalyst). The induction period might be caused by slow generation of a reactive catalyst-substrate complex. The slow generation of the active catalyst-substrate complex might be caused by an equilibrium of a monomeric and a dimeric catalyst reservoir, where only the monomeric form is active or by slow ligand exchange (e.g. enone coordination might be necessary for a productive reaction pathway), also see chapter “Investigation of the Non-Linear Effect of FIP-O<sub>2</sub>CC<sub>3</sub>F<sub>7</sub>”.

## Reaction Order of Acetic Acid

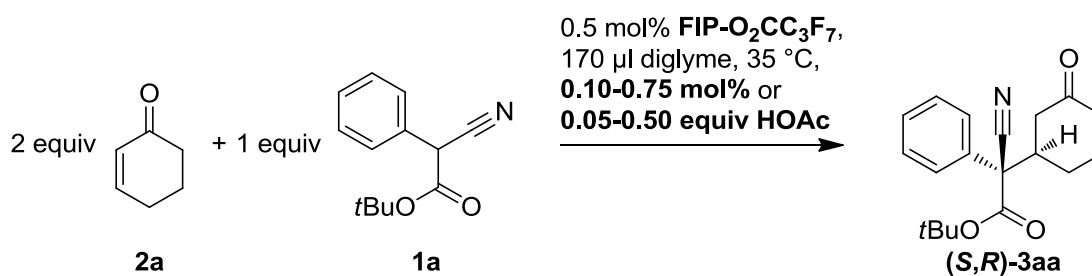

For the determination of the reaction order of acetic acid the catalysis was performed with a wide range of acetic acid amounts. Either acid amounts smaller or almost equal to the concentration of palladium were used (0.10 to 0.75 mol%), or larger amounts (0.05 to 0.50 equiv) were used.

Nearly identical reaction rates were obtained for  $[\text{HOAc}] \leq [\text{Pd}]$  (Figure 31, *top*) pointing to a zero order kinetic. In case of  $[\text{HOAc}] \gg [\text{Pd}]$  the yield-time graph shows a slight dependency of

the reaction rate from the acetic acid amount (Figure 31, *bottom*). Higher acid amounts result in slightly higher reaction rates.

The initial reaction rates (Table 16) were calculated from the slope of the yield-time data for each test series.

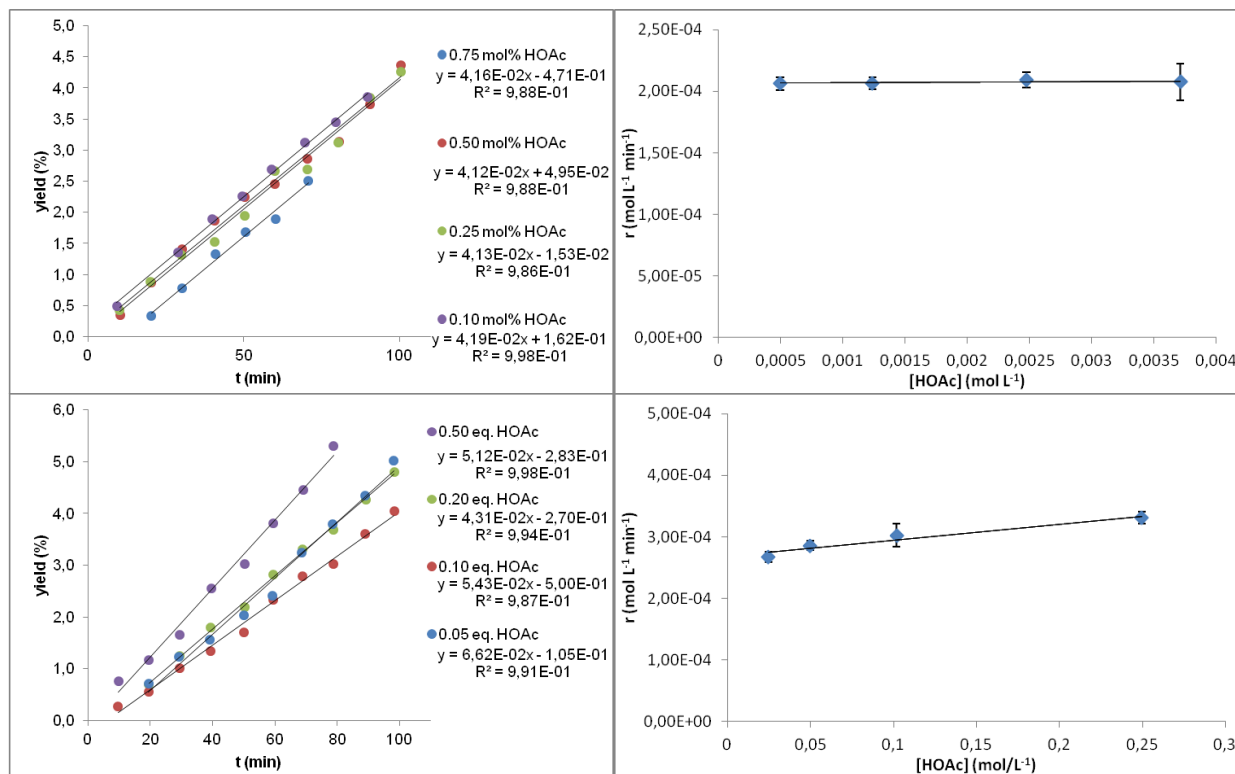

**Figure 31:** *Top:* Yield-time data and dependency of the initial reaction rate for varying amounts of HOAc, where  $[\text{HOAc}] \leq [\text{Pd}]$ . *Bottom:* Yield-time data and dependency of the initial reaction rate for varying amounts of HOAc, where  $[\text{HOAc}] \gg [\text{Pd}]$ .

**Table 16: Initial reaction rates for varying amounts of HOAc.**

| # | HOAc<br>(mol%) | $[\text{HOAc}]$<br>( $\text{mmol L}^{-1}$ ) | $r$<br>( $\text{mol L}^{-1} \text{min}^{-1}$ ) |
|---|----------------|---------------------------------------------|------------------------------------------------|
| 1 | 0.10           | 0.49                                        | $2.06 \cdot 10^{-4} \pm 5.14 \cdot 10^{-6}$    |
| 2 | 0.25           | 1.24                                        | $2.07 \cdot 10^{-4} \pm 4.73 \cdot 10^{-6}$    |
| 3 | 0.50           | 2.47                                        | $2.09 \cdot 10^{-4} \pm 6.23 \cdot 10^{-6}$    |
| 4 | 0.75           | 3.71                                        | $2.07 \cdot 10^{-4} \pm 1.46 \cdot 10^{-5}$    |
| 5 | 5              | 24.7                                        | $2.68 \cdot 10^{-4} \pm 8.02 \cdot 10^{-6}$    |
| 6 | 10             | 49.7                                        | $2.85 \cdot 10^{-4} \pm 7.61 \cdot 10^{-6}$    |
| 7 | 20             | 101.8                                       | $3.02 \cdot 10^{-4} \pm 1.87 \cdot 10^{-4}$    |
| 8 | 50             | 249.6                                       | $3.31 \cdot 10^{-4} \pm 9.77 \cdot 10^{-6}$    |

Logarithmic transformation of the obtained reaction rate data and the corresponding plots result in straight lines with a slope of 0.005 for  $[\text{HOAc}] \leq [\text{Pd}]$  (Figure 32, *left*) and 0.09 for  $[\text{HOAc}] \gg [\text{Pd}]$  (Figure 32, *right*). Corresponding to equation 3 the reaction order of acetic acid is determined to be **zero**. Both experiments lead to the same result.

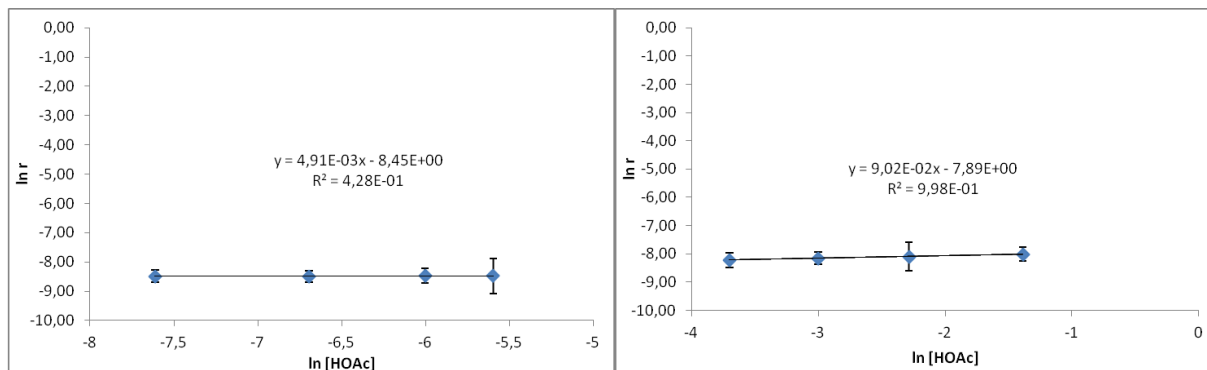

**Figure 32:** Determination of the reaction order for acetic acid. *Left:*  $[\text{HOAc}] \leq [\text{Pd}]$ . *Right:*  $[\text{HOAc}] \gg [\text{Pd}]$ .

## Reaction Order of Enone 2a

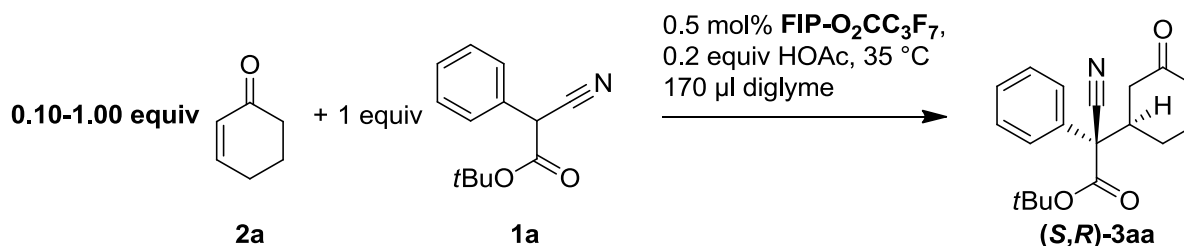

For the determination of the reaction order of the enone **2a** the catalysis was performed with enone **2a** amounts from 0.10 to 1.00 equiv, while all other concentrations were kept constant. The yield-time data shows a dependency of the initial reaction rate on the enone concentration (Figure 33, *left*). With higher concentrations the reaction occurs faster (Figure 33, *right*). The following initial reaction rates (

Table 17) were calculated from the slope of the yield-time data.

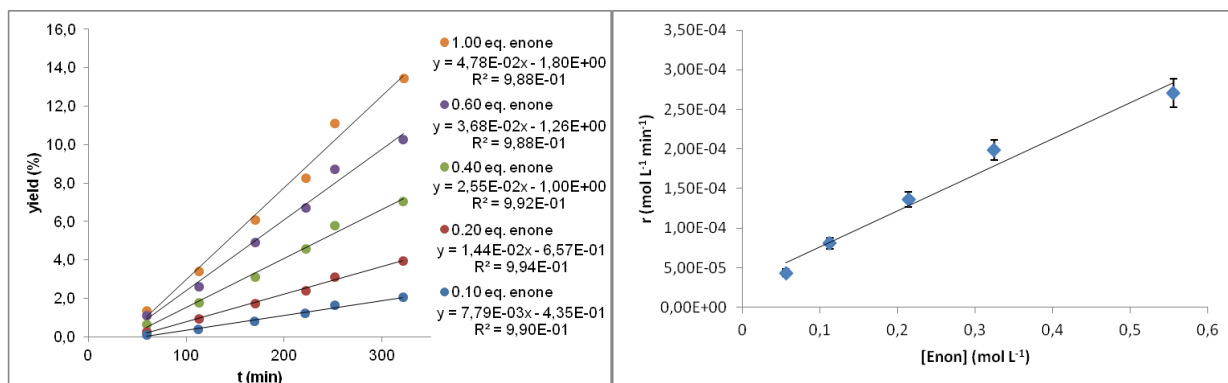

**Figure 33:** *Left:* Yield-time data for varying amounts of enone. *Right:* Plot of the initial reaction rates as a function of the enone concentration.

**Table 17: Initial reaction rates for varying amounts of enone.**

| # | Amount enone (equiv) | [enone] (mol L <sup>-1</sup> ) | <i>r</i> (mol L <sup>-1</sup> min <sup>-1</sup> ) |
|---|----------------------|--------------------------------|---------------------------------------------------|
| 1 | 0.10                 | 0.056                          | $4.35 \cdot 10^{-5} \pm 4.44 \cdot 10^{-6}$       |
| 2 | 0.20                 | 0.113                          | $8.10 \cdot 10^{-5} \pm 6.72 \cdot 10^{-6}$       |
| 3 | 0.40                 | 0.214                          | $1.36 \cdot 10^{-4} \pm 9.88 \cdot 10^{-6}$       |
| 4 | 0.60                 | 0.324                          | $1.99 \cdot 10^{-4} \pm 1.31 \cdot 10^{-5}$       |
| 5 | 1.00                 | 0.555                          | $2.71 \cdot 10^{-4} \pm 1.80 \cdot 10^{-5}$       |

Logarithmic transformation of the initial reaction rate data results in a straight line with a slope of 0.81 (Figure 34) revealing a reaction order of **0.81** for the enone, according to equation 3.

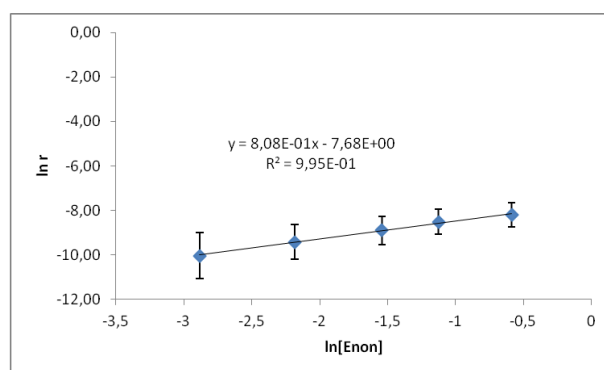

**Figure 34:** Determination of the reaction order for the enone.

## Reaction Order of $\alpha$ -Phenyl- $\alpha$ -cyanoacetate (**1a**)

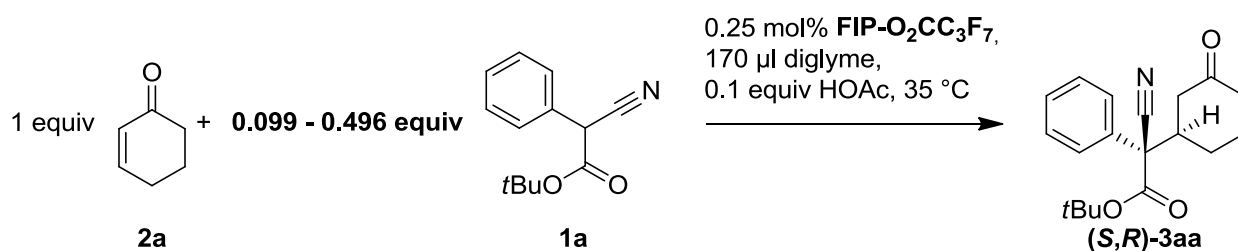

For the determination of the reaction order of the  $\alpha$ -phenyl- $\alpha$ -cyanoacetate **1a** the catalysis was performed with  $\alpha$ -phenyl- $\alpha$ -cyanoacetate amounts from 0.099 to 0.496 equiv, while all other concentrations were kept constant. The [product]-time data shows a dependency of the reaction rate from the cyanoacetate concentration (Figure 35, *left*). With higher cyanoacetate concentrations the reaction proceeds faster (Figure 35, *right*). The following initial reaction rates (Table 18) were calculated from the slope of the [product]-time data.

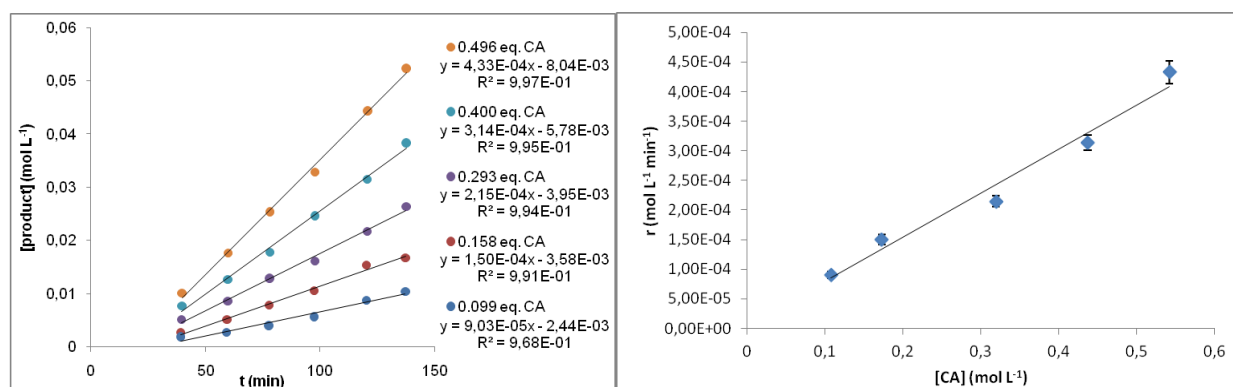

**Figure 35:** *Left:* [Product]-time data for varying amounts of  $\alpha$ -phenyl- $\alpha$ -cyanoacetate. *Right:* Initial reaction rates as a function of the cyanoacetate concentration.

**Table 18:** Initial reaction rates for varying amounts of  $\alpha$ -phenyl- $\alpha$ -cyanoacetate.

| # | Amount CA (equiv) | [CA] (mol L <sup>-1</sup> ) | <i>r</i> (mol L <sup>-1</sup> min <sup>-1</sup> ) |
|---|-------------------|-----------------------------|---------------------------------------------------|
| 1 | 0.099             | 0.108                       | $9.03 \cdot 10^{-5} \pm 5.30 \cdot 10^{-6}$       |
| 2 | 0.158             | 0.173                       | $15.0 \cdot 10^{-5} \pm 9.03 \cdot 10^{-6}$       |
| 3 | 0.293             | 0.217                       | $23.1 \cdot 10^{-5} \pm 9.26 \cdot 10^{-6}$       |
| 4 | 0.400             | 0.437                       | $31.4 \cdot 10^{-5} \pm 1.32 \cdot 10^{-5}$       |
| 5 | 0.496             | 0.542                       | $43.3 \cdot 10^{-5} \pm 1.91 \cdot 10^{-5}$       |

Logarithmic transformation of the initial reaction rate data results in a straight line with a slope of 0.91 (Figure 36) revealing a reaction order of **0.91** for the  $\alpha$ -phenyl- $\alpha$ -cyanoacetate, according to equation 3.

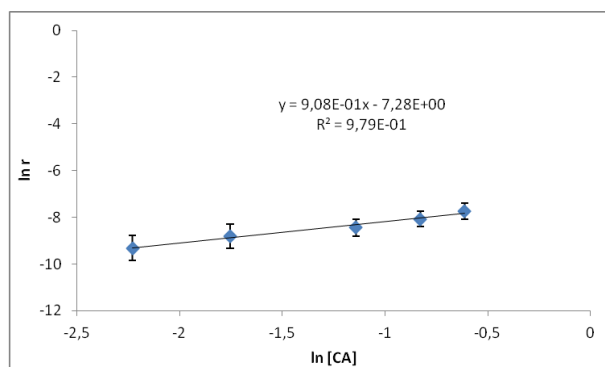

**Figure 36:** Determination of the reaction order for the  $\alpha$ -phenyl- $\alpha$ -cyanoacetate.

### Influence of Diglyme on the Reaction Rate

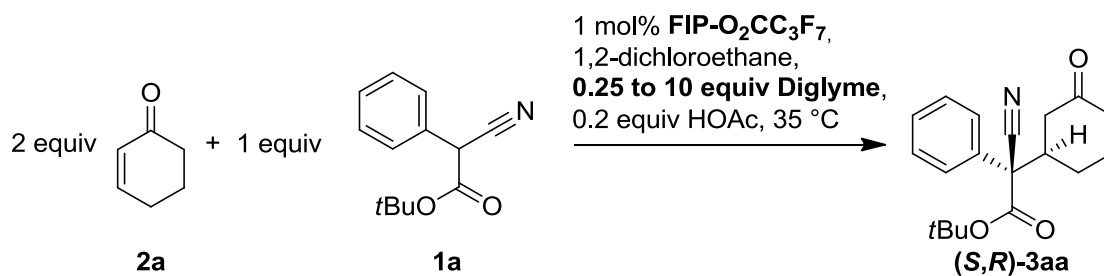

To investigate the influence of diglyme on the reaction rate of the catalysis reaction the experiments were performed in 1,2-dichloroethane with varying amounts of diglyme (0.25 to 10 equiv of diglyme). The total reaction volume of each experiment was 170  $\mu\text{L}$  solvent mixture. The yield-time data shows a dependency for the diglyme amounts on the reaction rate (Figure 37). The following initial reaction rates were calculated from the slope of the yield-time data (Table 19).

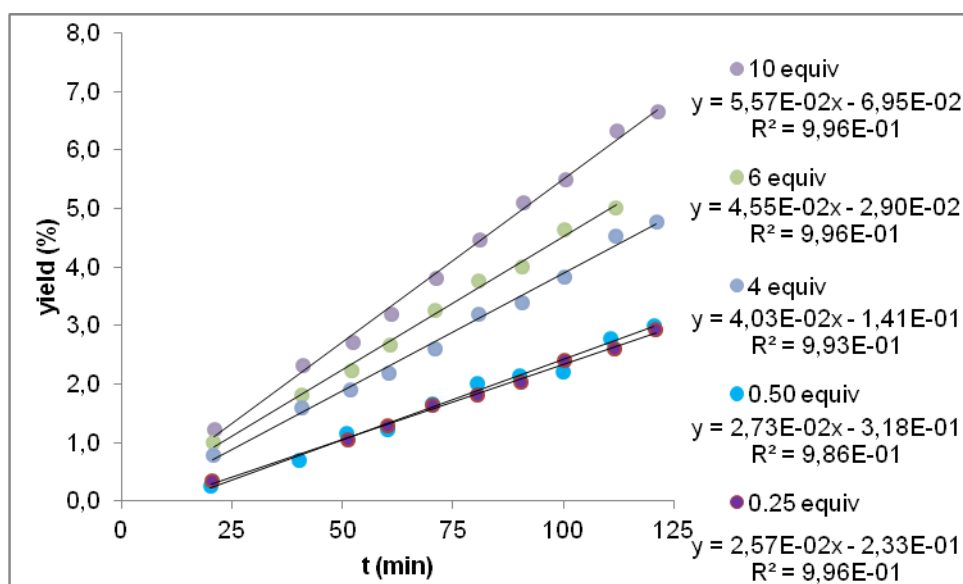

**Figure 37:** Yield-time data for varying amounts of diglyme.

**Table 19: Initial reaction rates for varying amounts of diglyme.**

| # | Diglyme (equiv) | Diglyme (vol%) | [Diglyme] (mol L <sup>-1</sup> ) | <i>r</i> (mol L <sup>-1</sup> min <sup>-1</sup> ) |
|---|-----------------|----------------|----------------------------------|---------------------------------------------------|
| 1 | 0.25            | 2.0            | $1.24 \cdot 10^{-1}$             | $1.27 \cdot 10^{-4} \pm 4.04 \cdot 10^{-6}$       |
| 2 | 0.5             | 3.9            | $2.47 \cdot 10^{-1}$             | $1.35 \cdot 10^{-4} \pm 6.75 \cdot 10^{-6}$       |
| 3 | 4.0             | 31.4           | 1.98                             | $1.99 \cdot 10^{-4} \pm 2.46 \cdot 10^{-6}$       |
| 4 | 6.0             | 47.0           | 2.97                             | $2.25 \cdot 10^{-4} \pm 2.61 \cdot 10^{-6}$       |
| 5 | 10              | 78.2           | 4.95                             | $2.76 \cdot 10^{-4} \pm 3.28 \cdot 10^{-6}$       |

The initial reaction rate as function of the diglyme concentration shows slightly higher initial reaction rates when higher amounts of diglyme are present (Figure 38). Determination of the reaction order for diglyme under these reaction conditions results in a broken reaction order of **0.20**. The influence of diglyme is thus lower than with the bimetallic catalyst **FBIP-O<sub>2</sub>CC<sub>3</sub>F<sub>7</sub>** (reaction order 0.46, for comparison see “Kinetic Investigations to the FBIP Catalyzed Asymmetric Michael-Addition”).

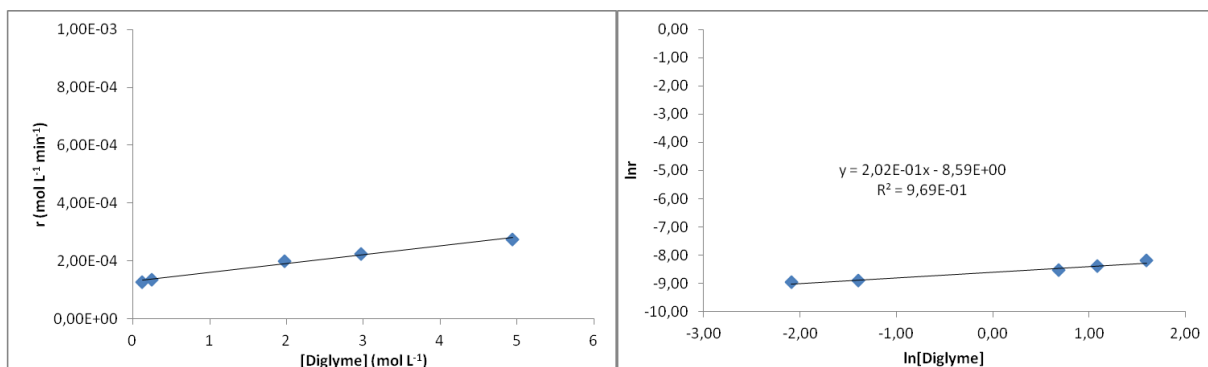

**Figure 38:** Initial reaction rates as a function of the diglyme concentration and the logarithmic data.

In contrast to the reaction with the bimetallic catalyst **FBIP-O<sub>2</sub>CC<sub>3</sub>F<sub>7</sub>** the experiments with the monometallic catalyst **FIP-O<sub>2</sub>CC<sub>3</sub>F<sub>7</sub>** in 1,2-dichloroethane have resulted in poor selectivity data, almost independent on the used amount of diglyme (Table 20). Concerning the enantioselectivity the reactions using a solvent mixture proceeded even worse than with pure 1,2-dichloroethane. However, an improved diastereoselectivity is achieved compared to experiments in pure DCE.

**Table 20: Influence of diglyme on the stereoselectivity.**

| # | Diglyme<br>(equiv) | Diglyme<br>(vol%) | $ee_{(S,R)}$<br>(%) | $ee_{(R,R)}$<br>(%) | $dr_{(S,R+R,S):(R,R+S,S)}$ |
|---|--------------------|-------------------|---------------------|---------------------|----------------------------|
| 1 | -                  | 0                 | 64                  | 35                  | 49:51                      |
| 3 | 0.25               | 2.0               | -15                 | 2                   | 67:33                      |
| 4 | 0.50               | 3.9               | -5                  | 6                   | 66:34                      |
| 5 | 4.0                | 31.4              | 17                  | 30                  | 70:30                      |
| 6 | 6.0                | 47.0              | 22                  | 18                  | 72:28                      |
| 7 | 10                 | 78.2              | 26                  | 15                  | 74:26                      |
| 8 | -                  | 100               | 89                  | 33                  | 71:29                      |



## Influence of MeCN on the Reaction Rate

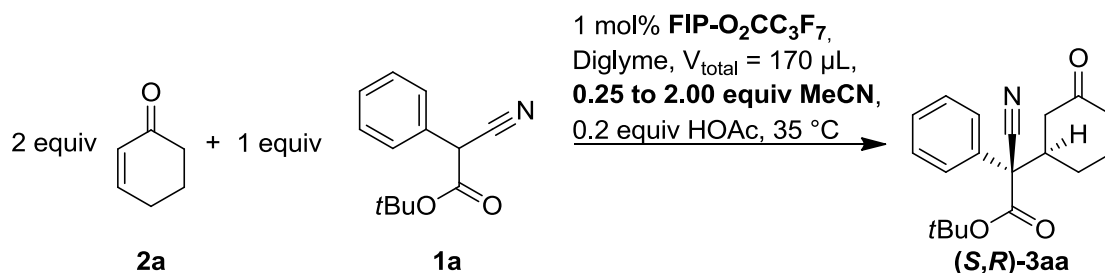

To investigate the influence of MeCN on the reaction rate of the catalysis reaction the experiments were performed in diglyme with varying amounts of MeCN (0.125 to 2.00 equiv of MeCN). The total reaction volume of each experiment was 170  $\mu\text{L}$  solvent mixture. The yield-time data shows a decrease of the initial reaction rate with increased MeCN amounts (Figure 39). The following initial reaction rates were calculated from the slope of the yield-time data (Table 21).

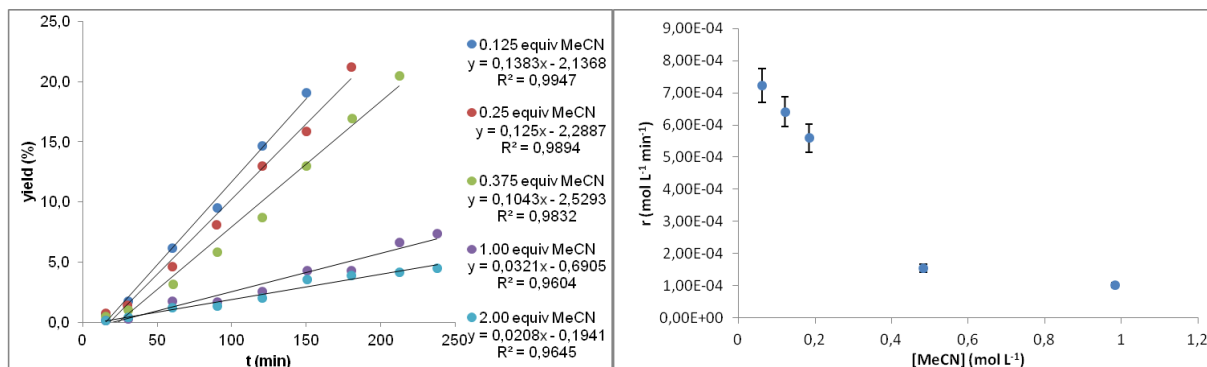

**Figure 39:** Yield-time data for varying amounts of MeCN and initial reaction rates as a function of the MeCN concentration.

**Table 21:** Initial reaction rates for varying amounts of MeCN.

| # | MeCN (equiv) | [MeCN] (mol L <sup>-1</sup> ) | <i>r</i> (mol L <sup>-1</sup> min <sup>-1</sup> ) |
|---|--------------|-------------------------------|---------------------------------------------------|
| 1 | 0.125        | $6.14 \cdot 10^{-2}$          | $7.23 \cdot 10^{-4} \pm 5.31 \cdot 10^{-5}$       |
| 2 | 0.25         | $1.22 \cdot 10^{-1}$          | $6.41 \cdot 10^{-4} \pm 4.64 \cdot 10^{-5}$       |
| 3 | 0.375        | $1.85 \cdot 10^{-1}$          | $5.59 \cdot 10^{-4} \pm 4.35 \cdot 10^{-5}$       |
| 4 | 1.00         | $4.83 \cdot 10^{-1}$          | $1.55 \cdot 10^{-4} \pm 1.27 \cdot 10^{-5}$       |
| 5 | 2.00         | $9.83 \cdot 10^{-1}$          | $1.02 \cdot 10^{-4} \pm 7.39 \cdot 10^{-6}$       |

Logarithmic transformation of the initial reaction rate data results in a straight line with a slope of  $-0.79$  (Figure 40) revealing a broken, negative reaction order of  $-0.79$  for MeCN under these

reaction conditions. The negative reaction order can be explained by reversible coordination of MeCN to the catalyst and thereby inhibition of the active catalyst.

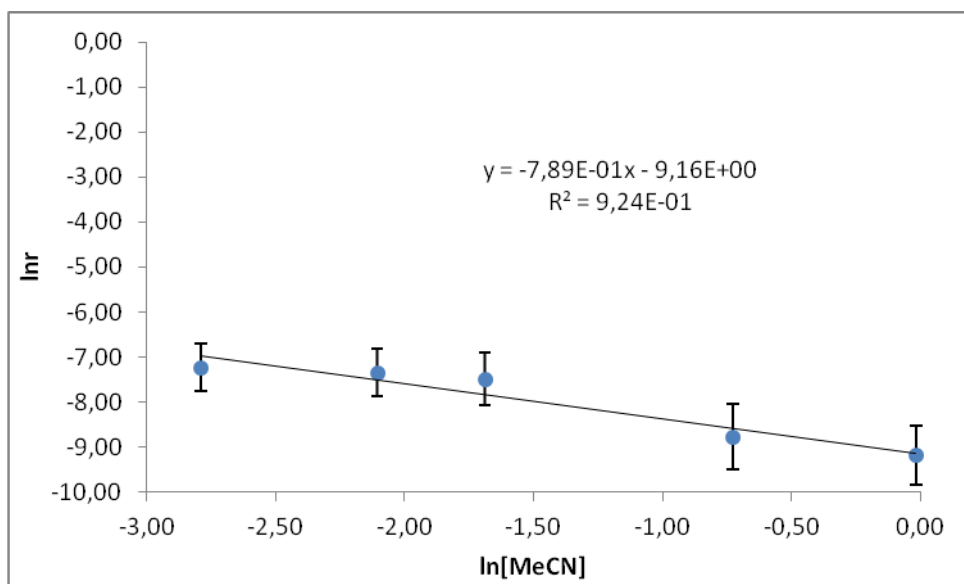

**Figure 40:** Determination of the reaction order of MeCN.

### Investigation of the Non-Linear Effect of FIP-O<sub>2</sub>CC<sub>3</sub>F<sub>7</sub>

For the investigation of the presence of a non-linear effect in the FIP-O<sub>2</sub>CC<sub>3</sub>F<sub>7</sub> catalysis, a series of catalyst mixtures with defined enantiomeric excesses were used in the Michael-addition of **1a** to **2a** following GP3 (Table 22). Both the monomeric and the dimeric systems show a positive non-linear effect (Figure 41).

**Table 22:** Investigation on the non-linear effect of monomeric and dimeric FIP-O<sub>2</sub>CC<sub>3</sub>F<sub>7</sub>.

| # | <i>monomeric catalyst</i>           |                                  | <i>dimeric catalyst</i>           |                                  |
|---|-------------------------------------|----------------------------------|-----------------------------------|----------------------------------|
|   | <i>ee</i> of monomeric catalyst (%) | <i>ee</i> <sub>product</sub> (%) | <i>ee</i> of dimeric catalyst (%) | <i>ee</i> <sub>product</sub> (%) |
| 1 | 0                                   | 3                                | 0                                 | 0                                |
| 2 | 15                                  | 15                               | 15                                | 18                               |
| 3 | 30                                  | 34                               | 30                                | 34                               |
| 4 | 45                                  | 50                               | 45                                | 53                               |
| 5 | 60                                  | 53                               | 60                                | 65                               |
| 6 | 75                                  | 75                               | 75                                | 83                               |
| 7 | >99                                 | 85                               | >99                               | 89                               |

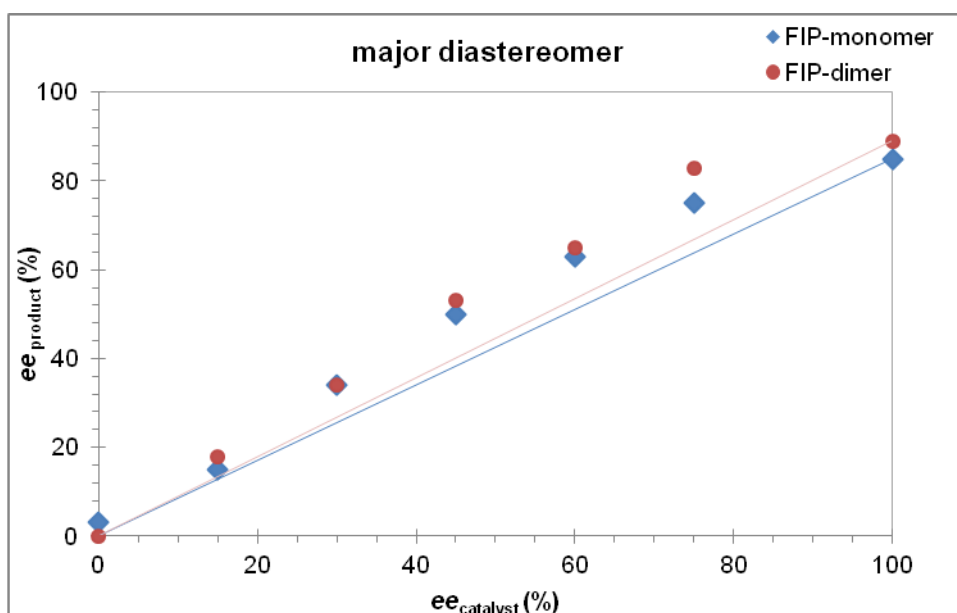

**Figure 41:** Investigation of the non-linear effect of monomeric and dimeric **FIP-O<sub>2</sub>CC<sub>3</sub>F<sub>7</sub>**.

### Spectroscopic Investigation of the Nature of **FIP-O<sub>2</sub>CC<sub>3</sub>F<sub>7</sub>**

The presence of the above mentioned equilibrium between a monomeric and dimeric catalyst species is confirmed by <sup>1</sup>H NMR measurements. The <sup>1</sup>H NMR of **FIP-O<sub>2</sub>CC<sub>3</sub>F<sub>7</sub>** (6.17 mg) in CDCl<sub>3</sub> (600 μL) shows a monomeric (*e.g.*: δ = 5.80 ppm, Cp-*H*) and a dimeric (*e.g.*: δ = 5.75 ppm, Cp-*H*) form with a ratio of 3.8:1 (Figure 42, spectrum a). Addition of 50 equiv of MeCN slightly pushes the equilibrium to the side of the monomeric species (ratio 6.4:1, spectrum b), while with 100 equiv MeCN only the monomeric catalyst **FIP-O<sub>2</sub>CC<sub>3</sub>F<sub>7</sub>** is visible (spectrum c). <sup>1</sup>H-NMR of **FIP-O<sub>2</sub>CC<sub>3</sub>F<sub>7</sub>** in MeCN-D<sub>3</sub> shows that the Cp-*H* and CHPh signals between δ = 4.74 and 4.43 ppm are shifted (spectrum d), pointing to a new species with probably two MeCN molecules coordinating to the Pd center.

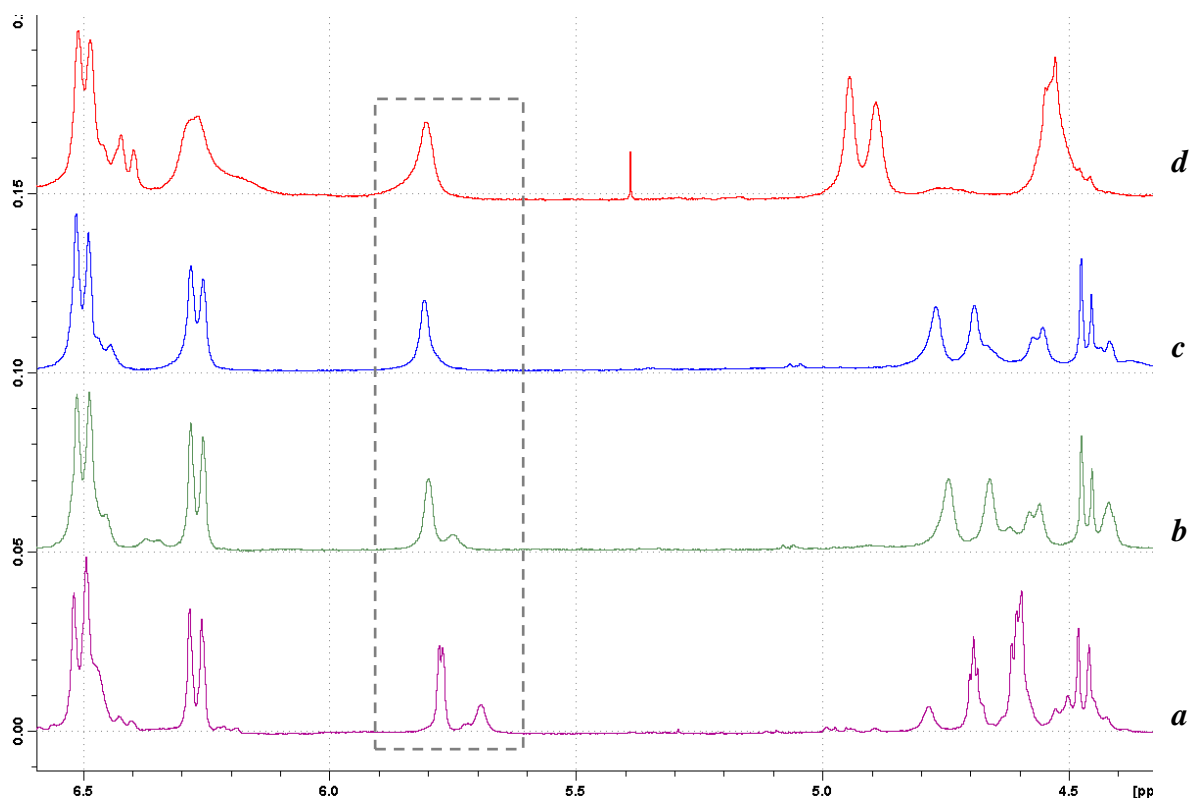

**Figure 42:** Detail of the  $^1\text{H}$  NMR of **FIP-O<sub>2</sub>CC<sub>3</sub>F<sub>7</sub>** in a)  $\text{CDCl}_3$ , b)  $\text{CDCl}_3$  + 50 equiv MeCN, c)  $\text{CDCl}_3$  + 100 equiv MeCN and d)  $\text{MeCN-D}_3$ .

**$^1\text{H}$  NMR (500 MHz,  $\text{CDCl}_3$ , 21 °C) of the monomeric form in the presence of 100 equiv MeCN:**  $\delta$  = 7.55 (*d*,  $J$  = 7.8, 2H, arom. *H*), 7.29 (*d*,  $J$  = 7.8, 2H, arom. *H*), 7.24-7.19 (*m*, 12H, arom. *H*), 7.12-6.99 (*m*, 19H, arom. *H*), 6.89 (*b*, 2H, arom. *H*), 6.50 (*d*,  $J$  = 6.7, 2H, arom. *H*), 6.27 (*d*,  $J$  = 7.8, 1H, arom. *H*), 5.81 (*b*, 1H, Cp-*H*), 4.74-4.42 (*m*, 3H, Cp-*H* and *CHPh*), 2.50 (*s*, 3H,  $\text{C}_6\text{H}_4\text{CH}_3$ ), 2.21 (*s*, 3H,  $\text{Pd}\leftarrow\text{NCCCH}_3$ ), 2.00 (*s*, free  $\text{NCCCH}_3$ ).

## Course of the Reaction

The investigation of the course of the reaction was performed to gain a detailed insight into the evolution of the enantio- and diastereoselectivity of the reaction. For this purpose the reaction was carried out according to GP3, but on a larger scale using 0.46 mmol of **1a** in diglyme (850  $\mu\text{L}$ ). For the analysis 25  $\mu\text{L}$  of the reaction mixture were added to 500  $\mu\text{L}$  of acetonitrile to stop the reaction and release product and starting material from the catalyst. The sample was filtered over a short pad of silica to completely remove the catalyst. The filter cake was washed with petrol ether: ethyl acetate (4:1). After removal of the solvent and an excess of enone **2a** the

samples were analyzed by RP-HPLC and chiral stationary phase HPLC to determine yield, enantiomeric excess and diastereomeric ratio.

Two different experiments were performed:

- normal substrate addition order (enone **2a** is added as last component),
- and reverse substrate addition (cyanoacetate **1a** is added as last component).

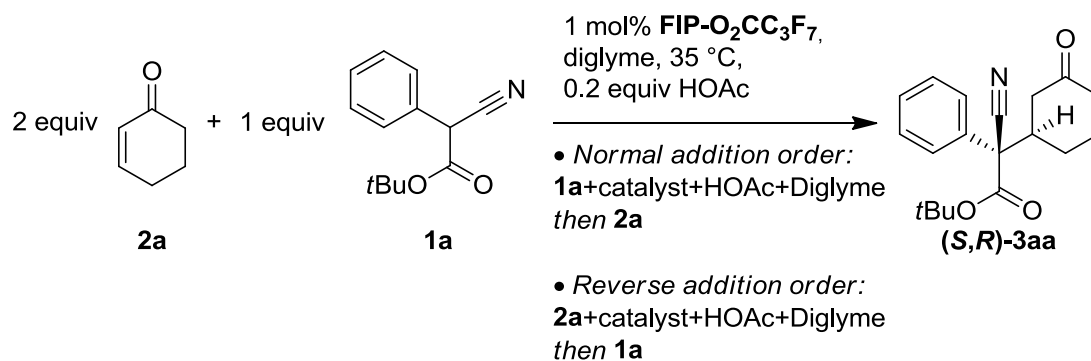

The collected yield, enantioselectivity data and diastereoselectivity data of both experiments are shown in Table 23.

**Table 23: Collected data during the reaction.**

| #  | <i>normal addition order</i> |              |                                   |                                   |                                               | <i>reverse addition order</i> |              |                                   |                                   |                                               |
|----|------------------------------|--------------|-----------------------------------|-----------------------------------|-----------------------------------------------|-------------------------------|--------------|-----------------------------------|-----------------------------------|-----------------------------------------------|
|    | Time<br>(min)                | Conv.<br>(%) | <i>ee</i> <sub>(S,R)</sub><br>(%) | <i>ee</i> <sub>(R,R)</sub><br>(%) | <i>dr</i> <sub>(S,R+R,S):<br/>(R,R+S,S)</sub> | Time<br>(min)                 | Conv.<br>(%) | <i>ee</i> <sub>(S,R)</sub><br>(%) | <i>ee</i> <sub>(R,R)</sub><br>(%) | <i>dr</i> <sub>(S,R+R,S):<br/>(R,R+S,S)</sub> |
| 1  | 9.88                         | 1.90         | 15                                | 28                                | 49:51                                         | 5.17                          | 0.10         | -5                                | 58                                | 48:52                                         |
| 2  | 14.83                        | 2.66         | 16                                | 11                                | 47:53                                         | 10.27                         | 0.29         | 2                                 | 48                                | 46:54                                         |
| 3  | 30.25                        | 2.01         | 50                                | 6                                 | 48:52                                         | 15.5                          | 0.40         | 15                                | 59                                | 44:56                                         |
| 4  | 44.50                        | 3.30         | 52                                | 3                                 | 51:49                                         | 20.12                         | 0.55         | 50                                | 26                                | 46:54                                         |
| 5  | 112.85                       | 10.37        | 73                                | -5                                | 59:41                                         | 25.33                         | 0.82         | 73                                | 23                                | 46:54                                         |
| 6  | 171.92                       | 15.87        | 76                                | -2                                | 62:38                                         | 50.17                         | 1.95         | 75                                | -10                               | 52:48                                         |
| 7  | 236.63                       | 25.07        | 81                                | 1                                 | 65:35                                         | 60.43                         | 2.39         | 76                                | -15                               | 53:47                                         |
| 8  | 310.25                       | 33.89        | 82                                | 8                                 | 67:33                                         | 97.92                         | 4.82         | 74                                | -5                                | 57:43                                         |
| 9  | 359.58                       | 43.90        | 83                                | 11                                | 68:32                                         | 125.92                        | 7.04         | 74                                | -12                               | 56:44                                         |
| 10 | 476.55                       | 49.13        | 85                                | 13                                | 70:30                                         | 180.58                        | 11.89        | 75                                | -5                                | 62:38                                         |
| 11 | 536.23                       | 55.15        | 85                                | 14                                | 70:30                                         | 240.17                        | 17.57        | 84                                | -6                                | 64:36                                         |
| 12 | 591.95                       | 59.61        | 85                                | 14                                | 70:30                                         | 300.67                        | 23.95        | 81                                | -3                                | 65:34                                         |
| 13 | -                            | -            | -                                 | -                                 | -                                             | 362.30                        | 30.18        | 85                                | -2                                | 64:36                                         |
| 14 | 20h                          | 90           | 89                                | 33                                | 71:29                                         | 20h                           | -            | 86                                | 17                                | 69:31                                         |

The yield-time curves of both reactions are similar (Figure 43). The reaction with normal addition order was followed for nearly 10 h. Using the reverse addition order the reaction was monitored for 6 h.

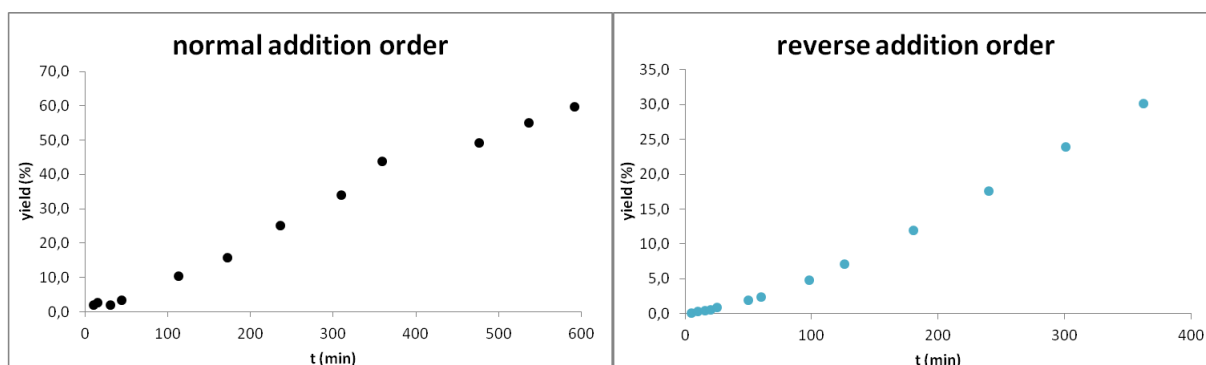

**Figure 43:** Time depending yields for the experiments with normal and reverse addition order of the substrates.

A slight difference for both experiments is the development of the enantiomeric excess (Figure 44). When the reaction is performed with the normal addition order of the substrates the *ee* of both diastereomers is moderate in the first minutes (Table 23, #1 to 5 *normal addition order*) until it reaches its final value after approximately six hours. When the addition order is changed and the cyanoacetate is added as last component, the *ee* of both diastereomers is in the first minutes again only moderate (Table 23, #1 to 4 *reverse addition order*) but increases faster than in the other experiment. The final value of the enantiomeric excesses is already reached after around three hours, but is in general slightly lower than the final *ee* value of the product, if the substrates are added in the normal order (Table 23, #14).

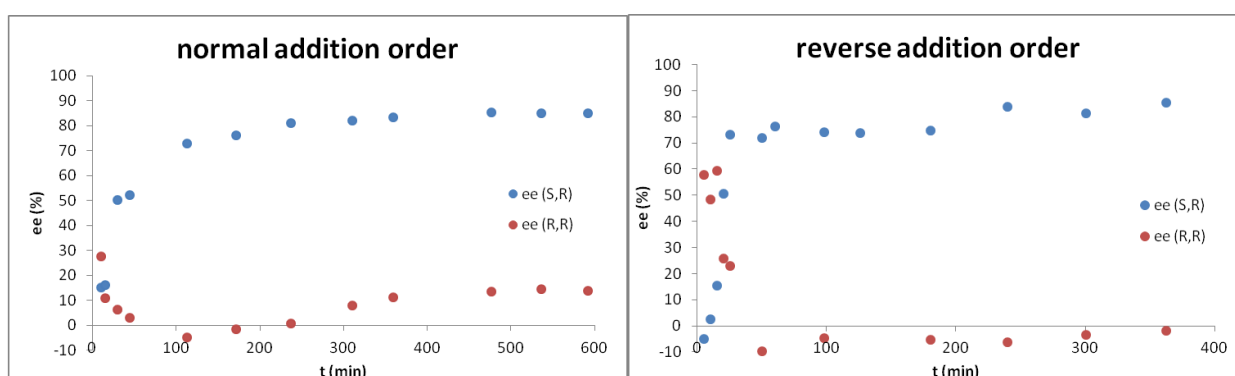

**Figure 44:** Development of the enantioselectivity in the experiments with normal and reverse addition order of the substrates.

A nearly identical course is observed for the development of the diastereomeric ratio for both experiments (Figure 45). Independent from the addition order of the substrates the reaction starts with poor diastereoselectivity (Table 23). With increasing reaction time the *dr* increases slowly

until the final value is reached after several hours. The final diastereomeric ratio is only little lower when the substrates are added in reverse order (Table 23, #14).

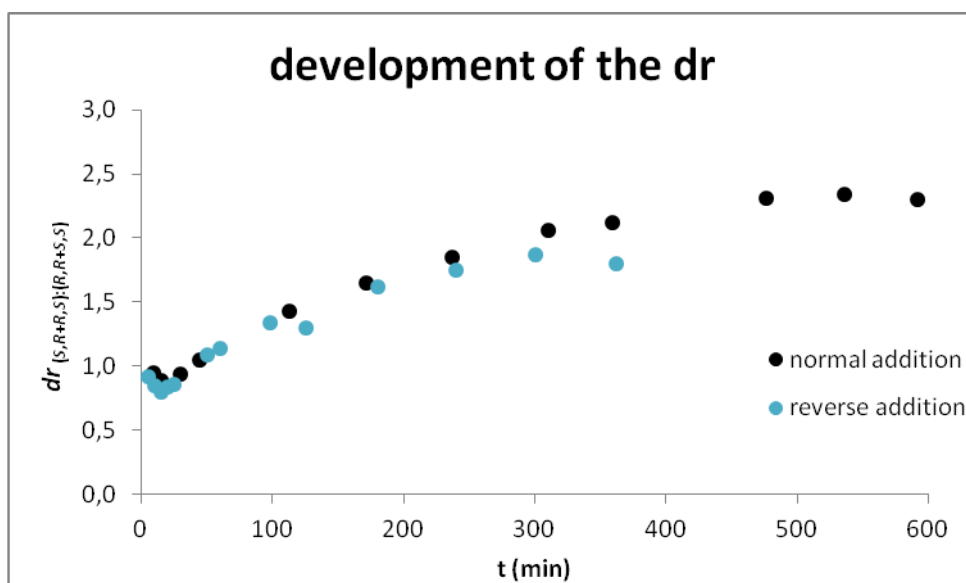

**Figure 45:** Development of the diastereomeric ratio in the experiments with normal and reverse addition order of the substrates.

In general the substrate addition order has only a low impact on the course of the **FIP-O<sub>2</sub>CC<sub>3</sub>F<sub>7</sub>** catalyzed asymmetric Michael-Addition of **1a** to **2a**. Under the tested reaction conditions the catalysis with reverse addition order of the substrates results in a faster formation of the desired (*S,R*)-enantiomer, but proceeds with little lower enantio- and diastereoselectivity in the end.

## References

- (1) Jautze, S.; Seiler, P.; Peters, R. *Angew Chem. Int. Ed.* **2007**, *46*, 1260.
- (2) Weiss, M. E.; Fischer, D. F.; Xin, Z.-q.; Jautze, S.; Schweizer, W. B.; Peters, R. *Angew. Chem. Int. Ed.* **2006**, *45*, 5694.
- (3) Albarella, J. P. *J. Org. Chem.* **1977**, *42*, 2009.
- (4) Wawrzenczyk, C.; Lochynski, S. *Monatsh. Chem.* **1985**, *116*, 99.
- (5) Zimmerman, H. E.; Suryanarayan, V. *Eur. J. Org. Chem.* **2007**, 4091.
- (6) Jautze, S.; Peters, R. *Angew. Chem., Int. Ed.* **2008**, *47*, 9284.
- (7) Anwer, M. K.; Spatola, A. F. *Tetrahedron Lett.* **1985**, *26*, 1381.
- (8) Byrne, A. J.; Barlow, J. W.; Walsh, J. J. *Bioorg. Med. Chem. Lett.* **2011**, 1191.
- (9) Ponnusamy, E.; Fotadar, U.; Spisni, A.; Fiat, D. *Synthesis* **1986**, 84.
- (10) Jung, M. E.; Kaas, S. M. *Tetrahedron Lett.* **1989**, *50*, 4439.
- (11) Mehta, A.; Jaouhari, R.; Benson, T. J.; Douglas, K. T. *Tetrahedron Lett.* **1992**, *33*, 5441.
- (12) Sawamura, M.; Hamashima, H.; Ito, Y. *Tetrahedron* **1994**, *50*, 4439.
- (13) Majima, K.; Tosaki, M.; Ohshima, T.; Shibasaki, M. *Tetrahedron Lett.* **2005**, *46*, 5377.
- (14) Atkins, P. W.; de Paula, J. *Atkins' Physical Chemistry*, 8th ed., Oxford University Press: Oxford, **2006**; pp 797-798 and Pilling, M. J.; Seakins, P. W. *Reaction Kinetics*, Oxford University Press: Oxford, **1995**; pp 16-19.



## NMR Spectra

Silver(I)(bistrifluoromethane)sulfonimide

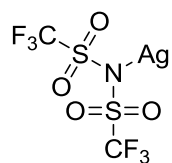

<sup>13</sup>C:

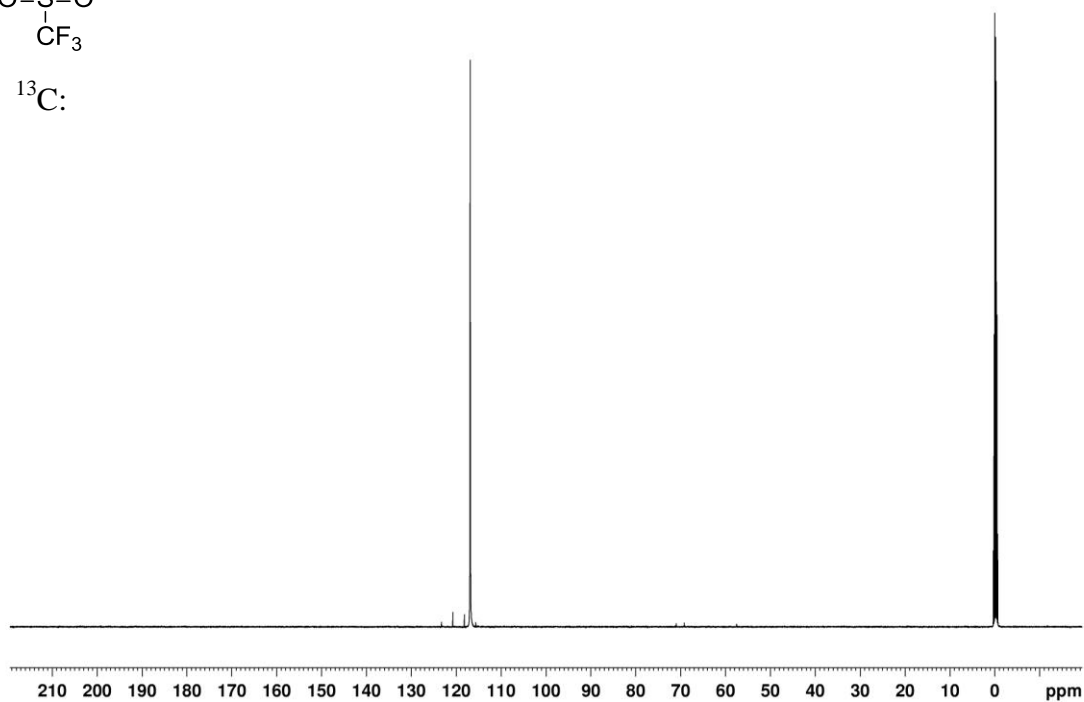

<sup>19</sup>F:

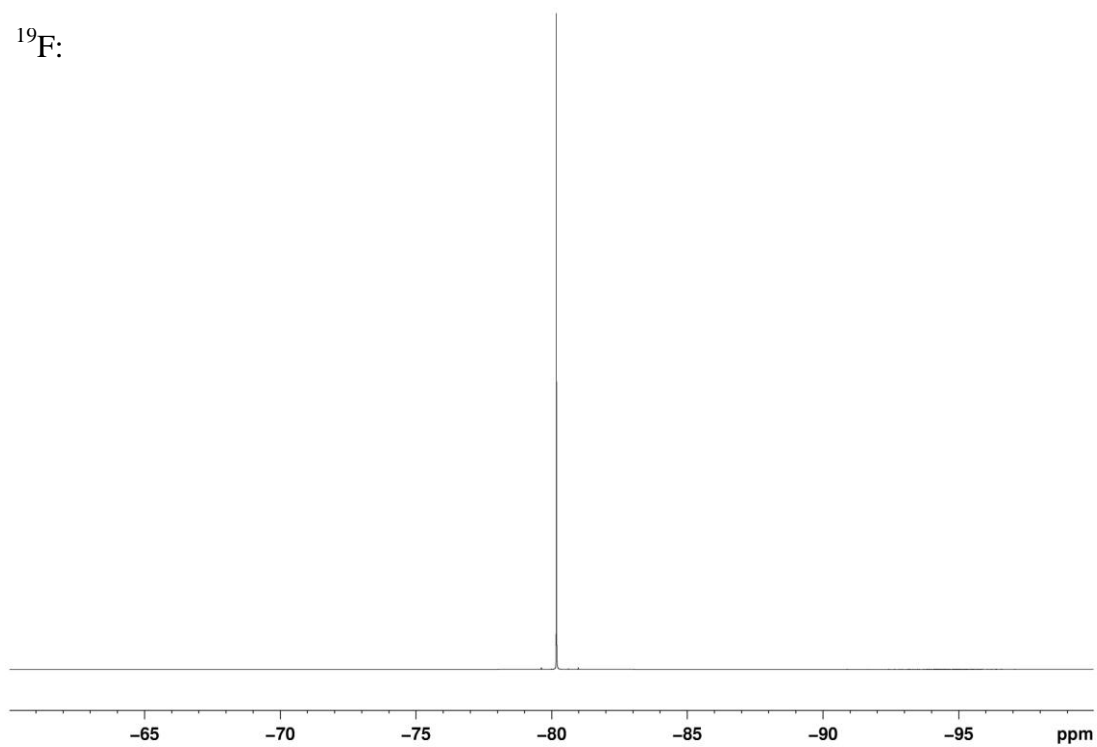

*tert*-Butyl-2-cyano-(*o*-fluorophenyl)acetate (**1k**)

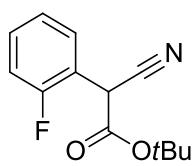

**1k**

$^1\text{H}$ :

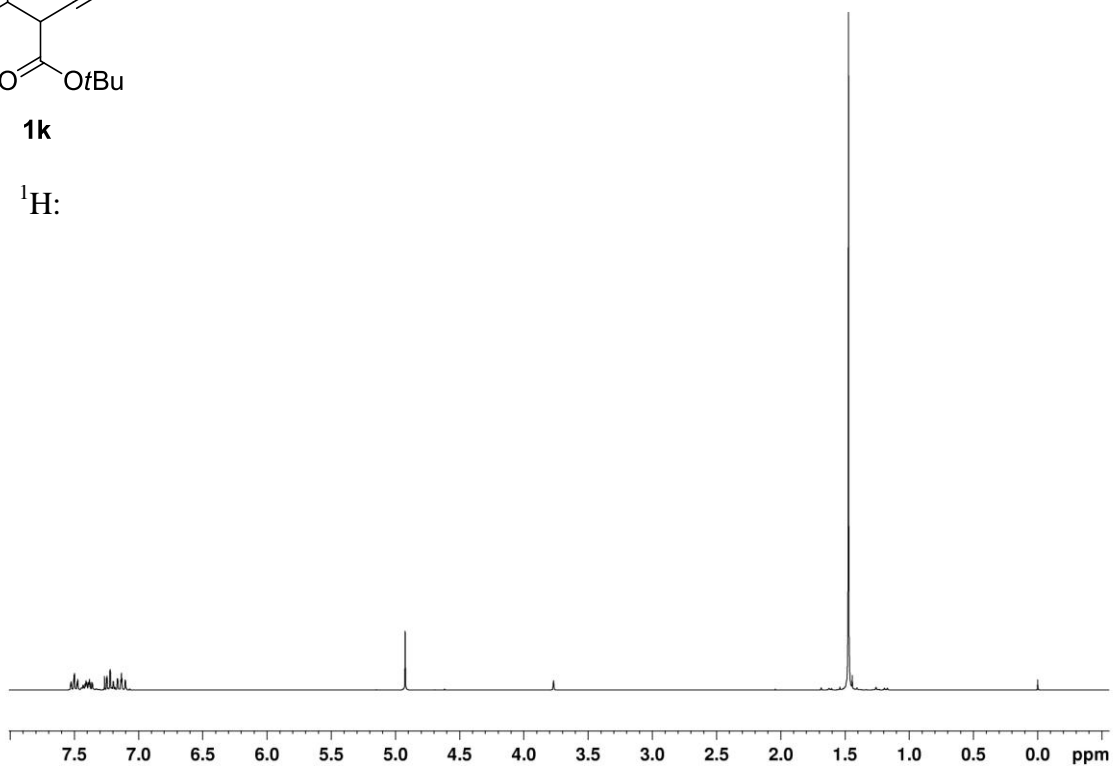

$^{13}\text{C}$ :

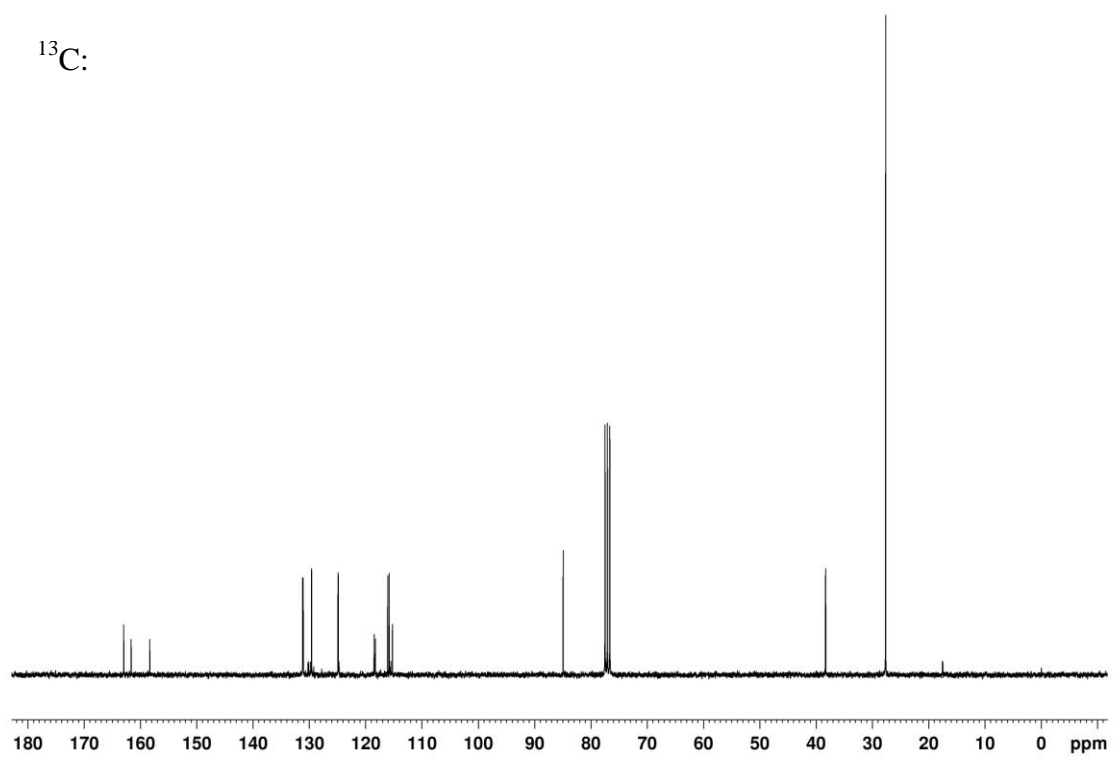

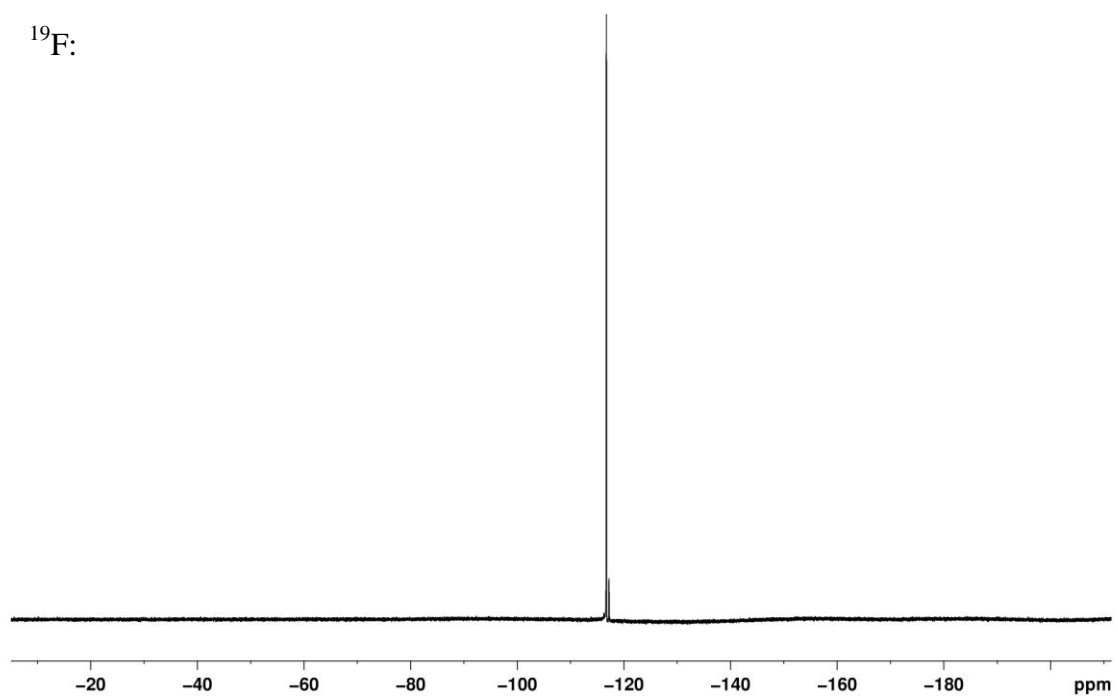

*tert*-Butyl-2-cyano-(*m*-fluorophenyl)acetate (**11**)

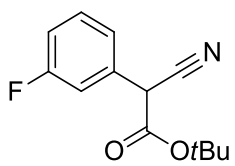

**11**

$^1\text{H}$ :

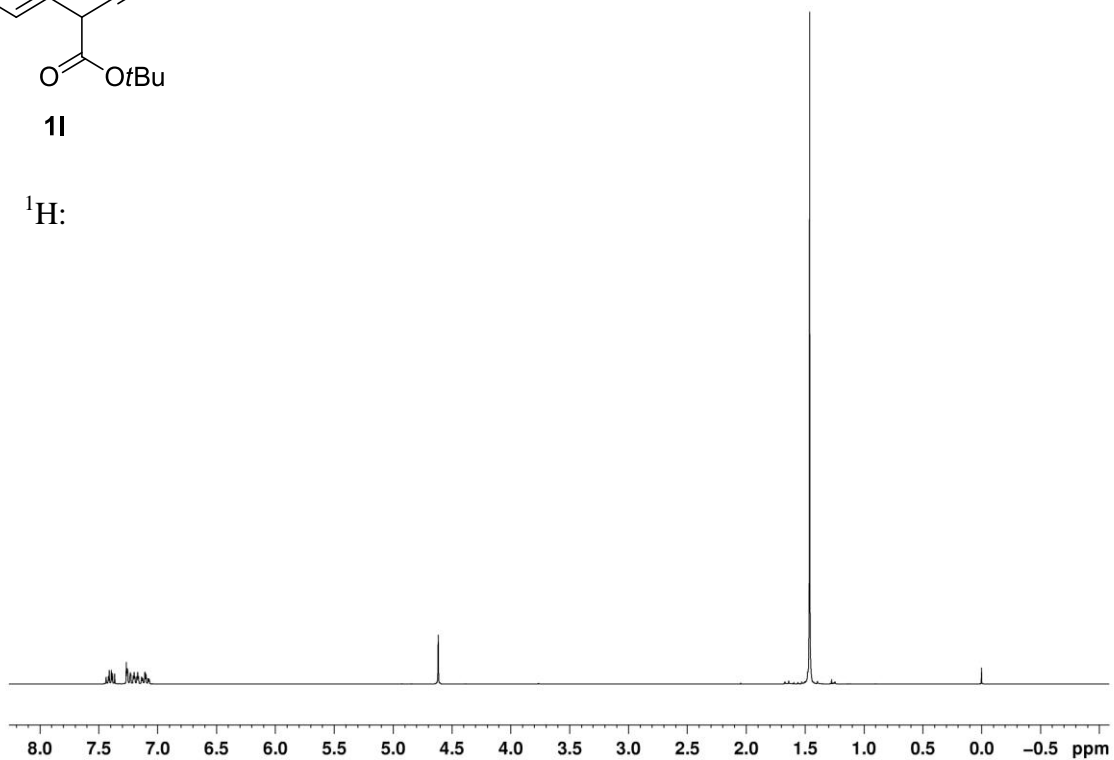

$^{13}\text{C}$ :

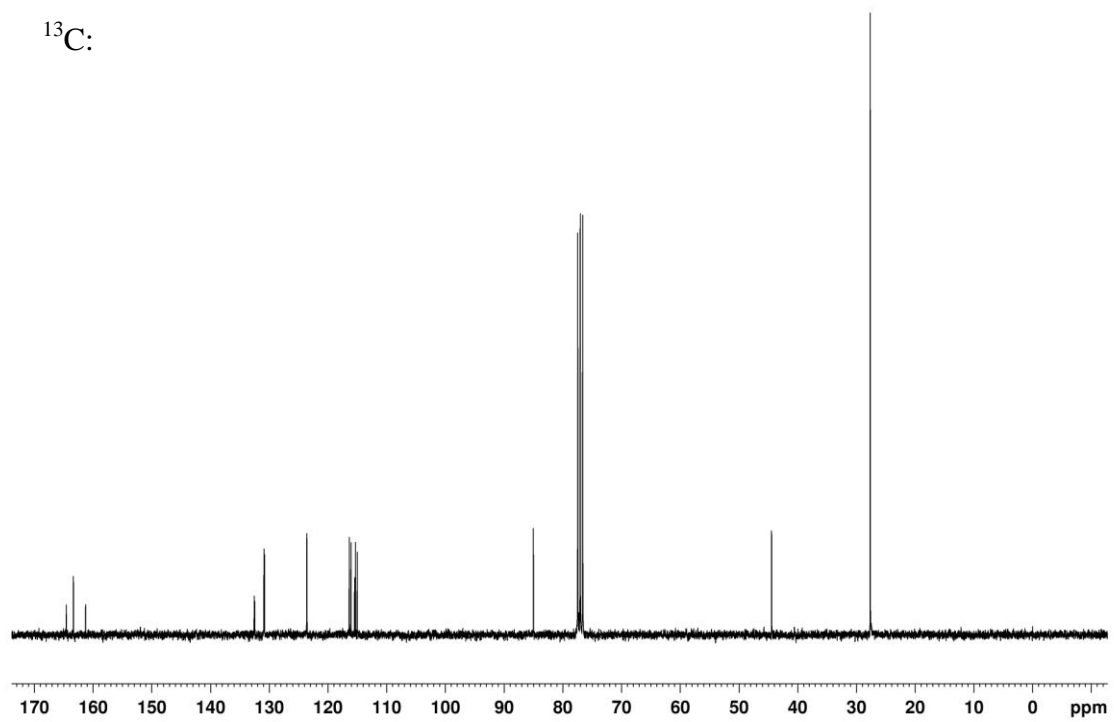

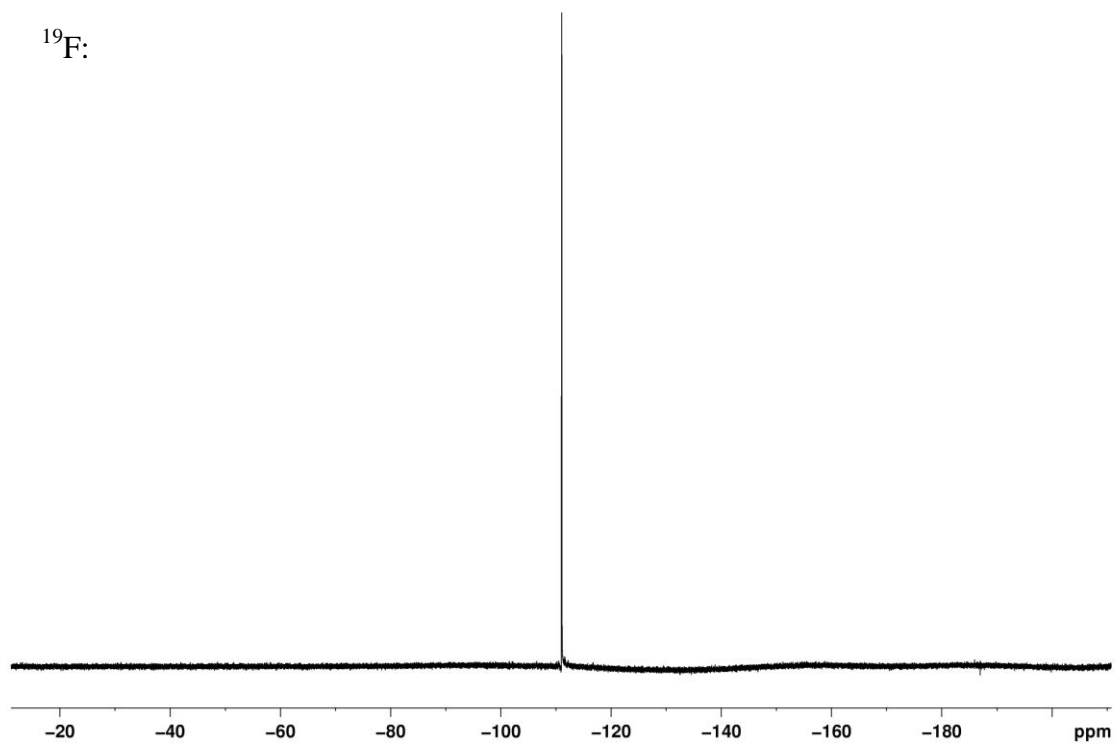

*tert*-Butyl-2-cyano-(4-methoxyphenyl)acetate (**1m**)

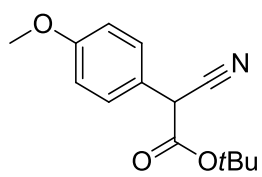

**1m**

$^1\text{H}$ :

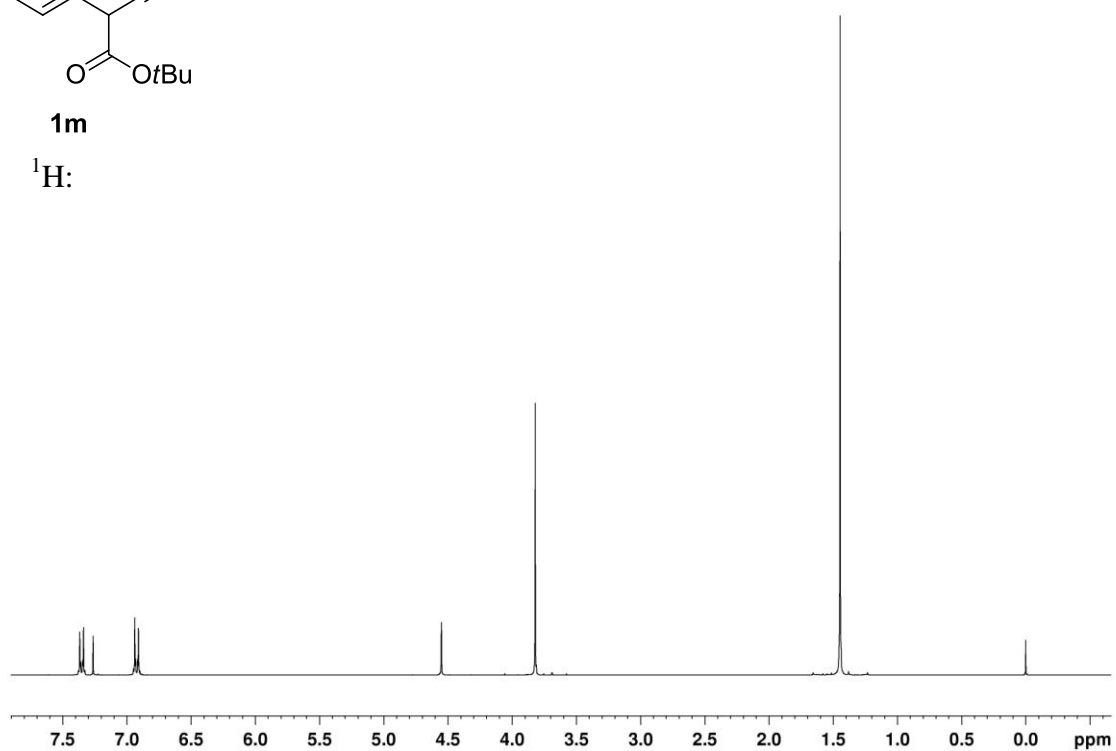

$^{13}\text{C}$ :

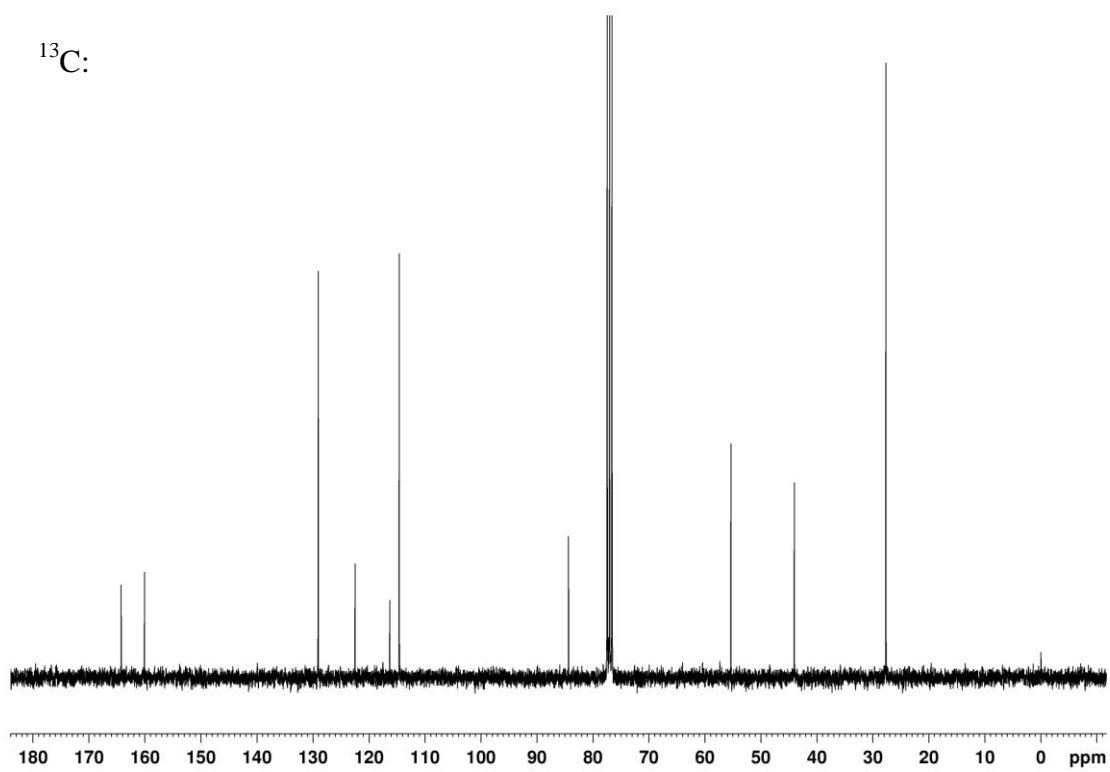

Bis(acetonitrile)[ $\mu$ -[(1*S*<sub>p</sub>,1'*S*<sub>p</sub>)-2,2'-bis[(4*R*,5*R*)-4,5-dihydro-1-[(4-methylphenyl)sulfonyl]-4,5-diphenyl-1*H*-imidazol-2-yl- $\kappa$ N3]-1,1'-ferrocendiyl- $\kappa$ C1:  $\kappa$ C1']]]bis(heptafluorobutyrate- $\kappa$ O)di-palladium(II) (**FBIP-O<sub>2</sub>CC<sub>3</sub>F<sub>7</sub>**)

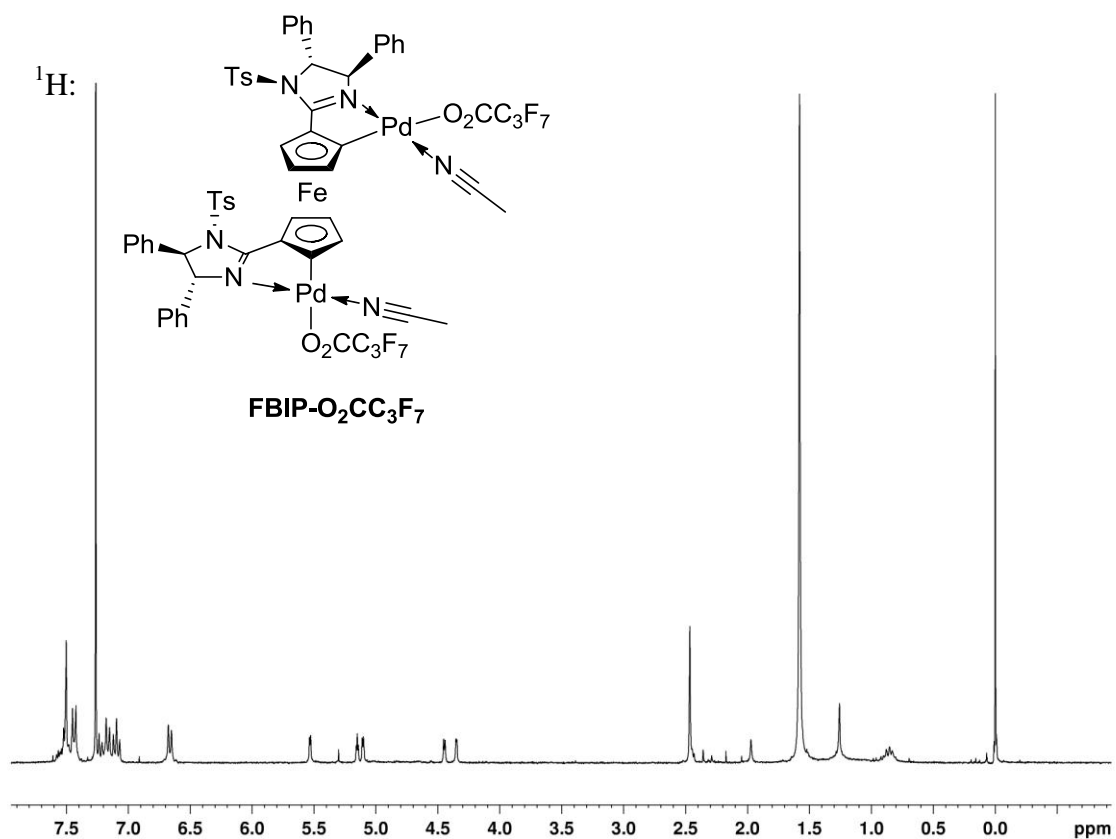

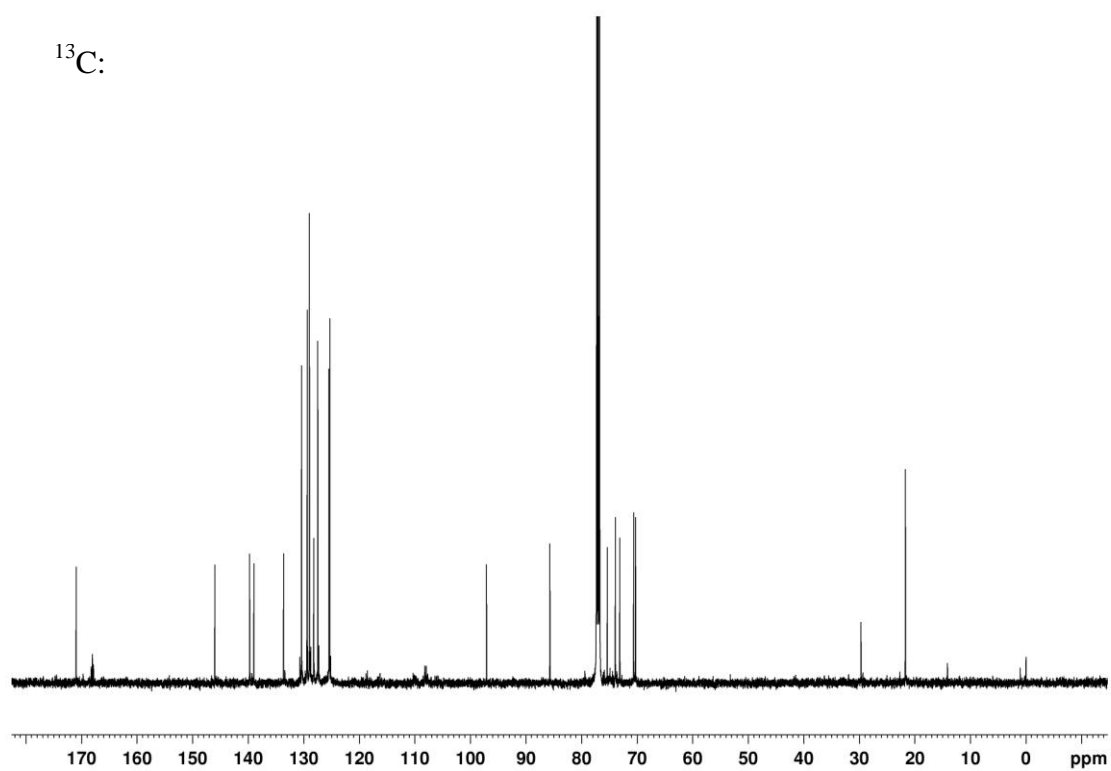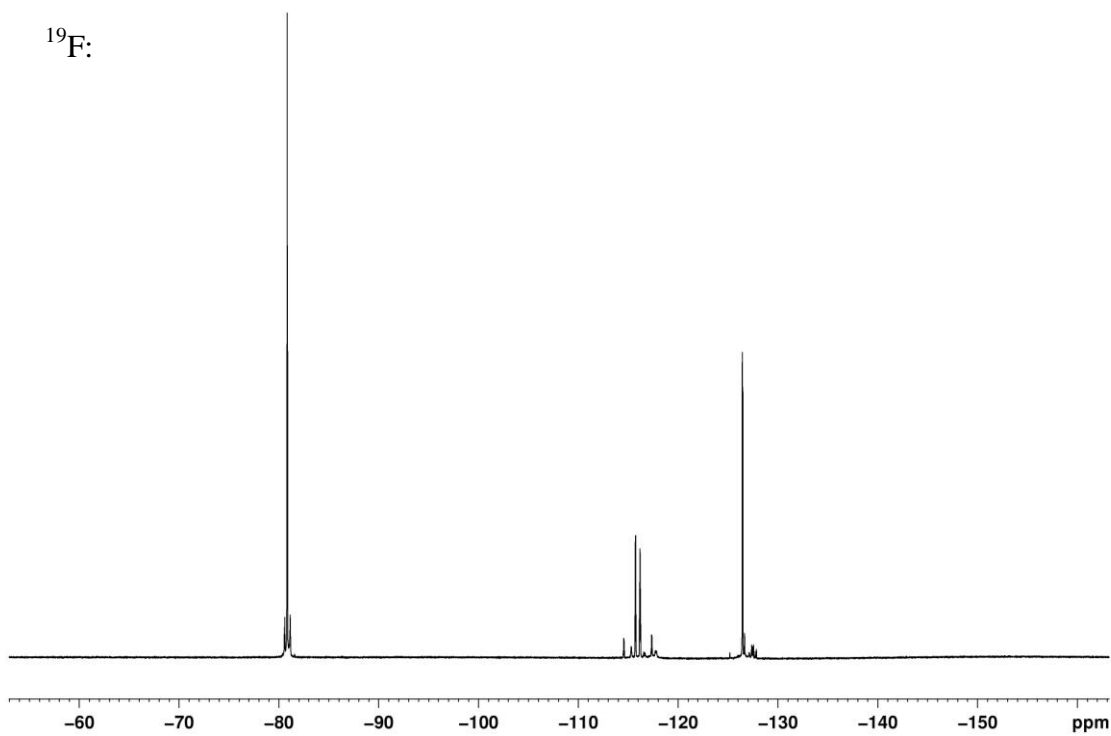



(Acetonitrile- $\kappa N$ )-(heptafluorobutyrate- $\kappa O$ )[(1*S*<sub>p</sub>)-2-[(4*R*,5*R*)-4,5-dihydro-1-[(4-methylphenyl)sulfonyl]-4,5-diphenyl-1*H*-imidazol-2-yl- $\kappa N3$ ]-1',2',3',4',5'-pentaphenylferrocenyl- $\kappa C$ ]-palladium(II) (**FIP-O<sub>2</sub>CC<sub>3</sub>F<sub>7</sub>**)

<sup>1</sup>H: mixture of monomeric and dimeric form

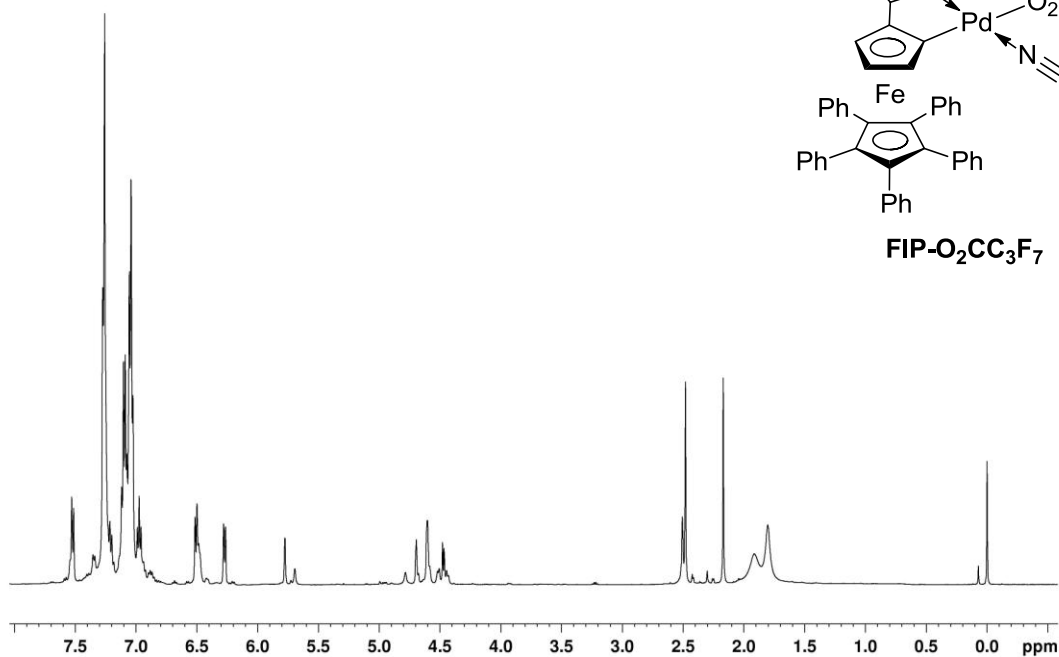

<sup>1</sup>H: monomeric form (**FIP-O<sub>2</sub>CC<sub>3</sub>F<sub>7</sub>** + 100 equiv MeCN)

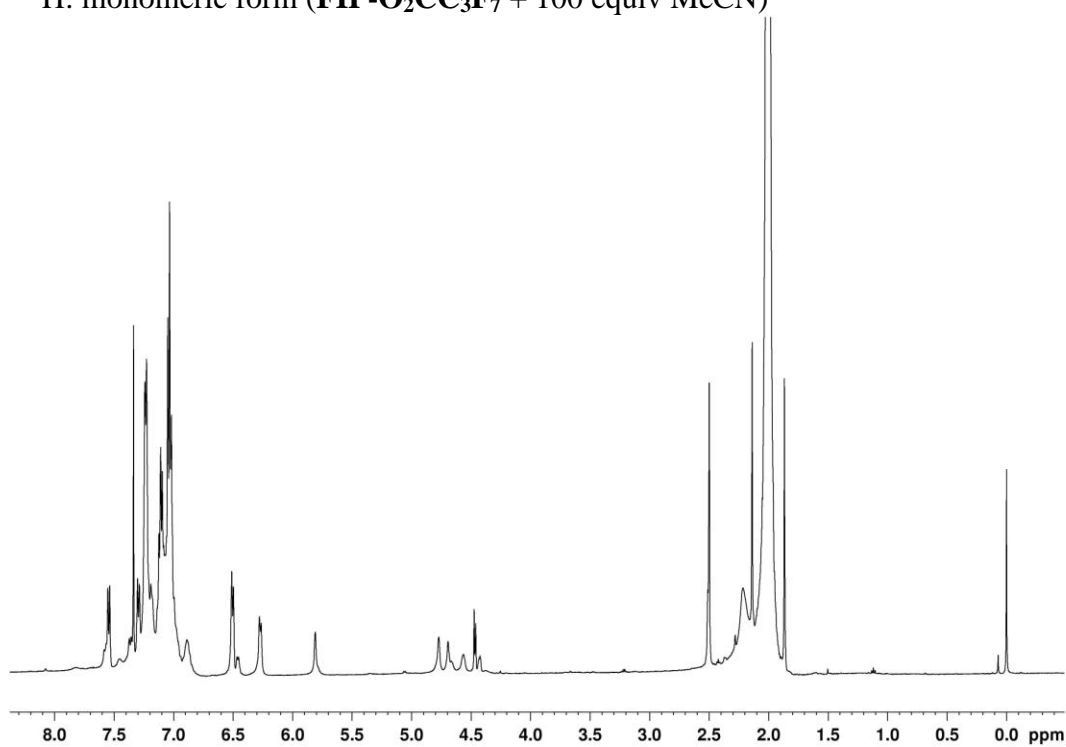

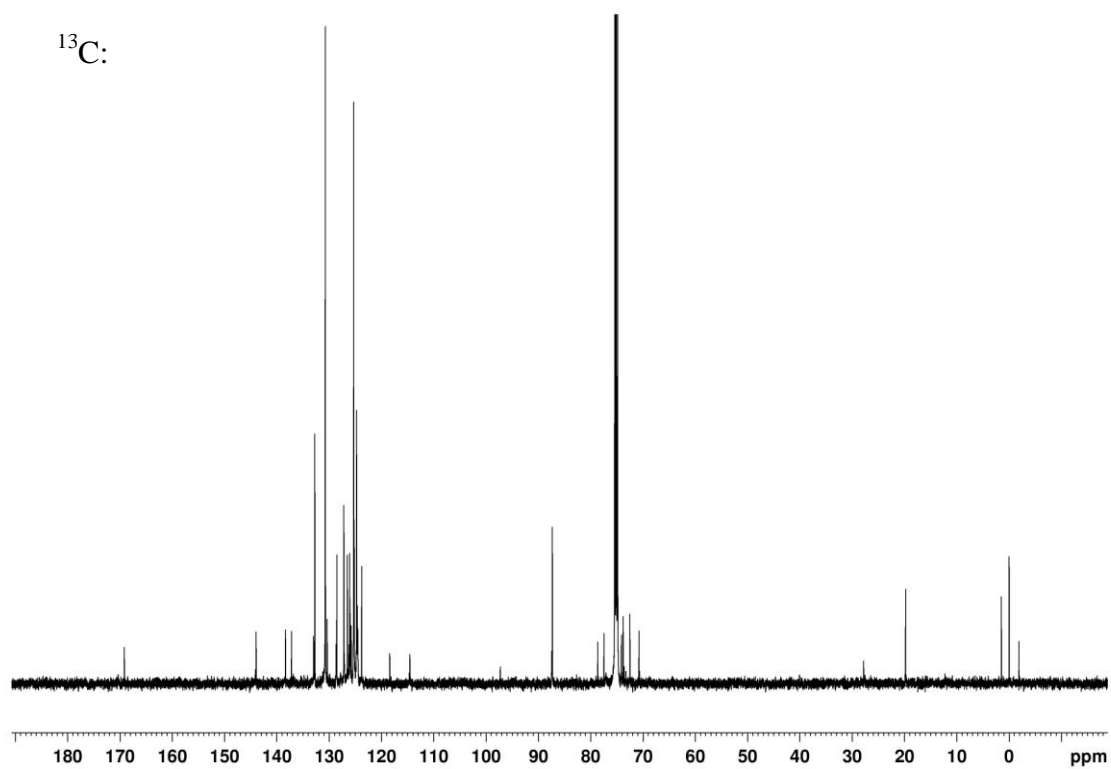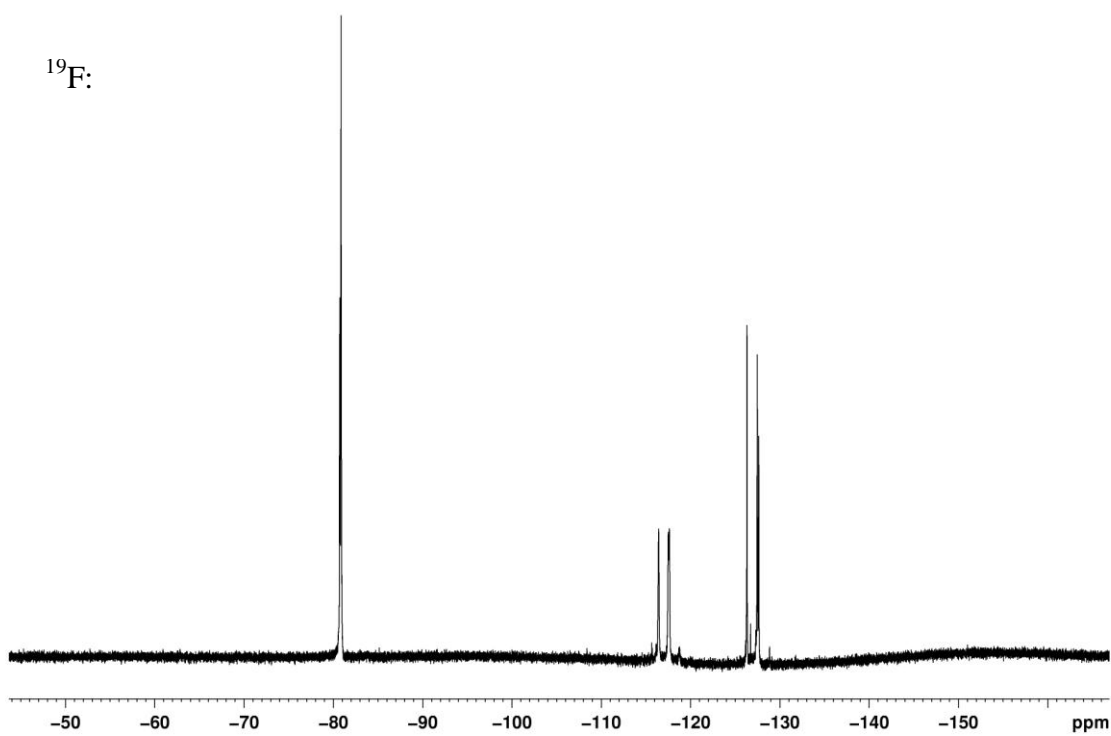

*tert*-Butyl-2-cyano-2-(3-oxocyclohexyl)-2-phenylacetate ((*R,R*)-**3aa**)

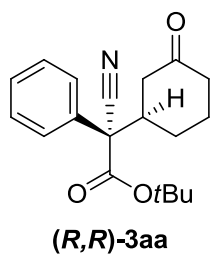

<sup>1</sup>H:

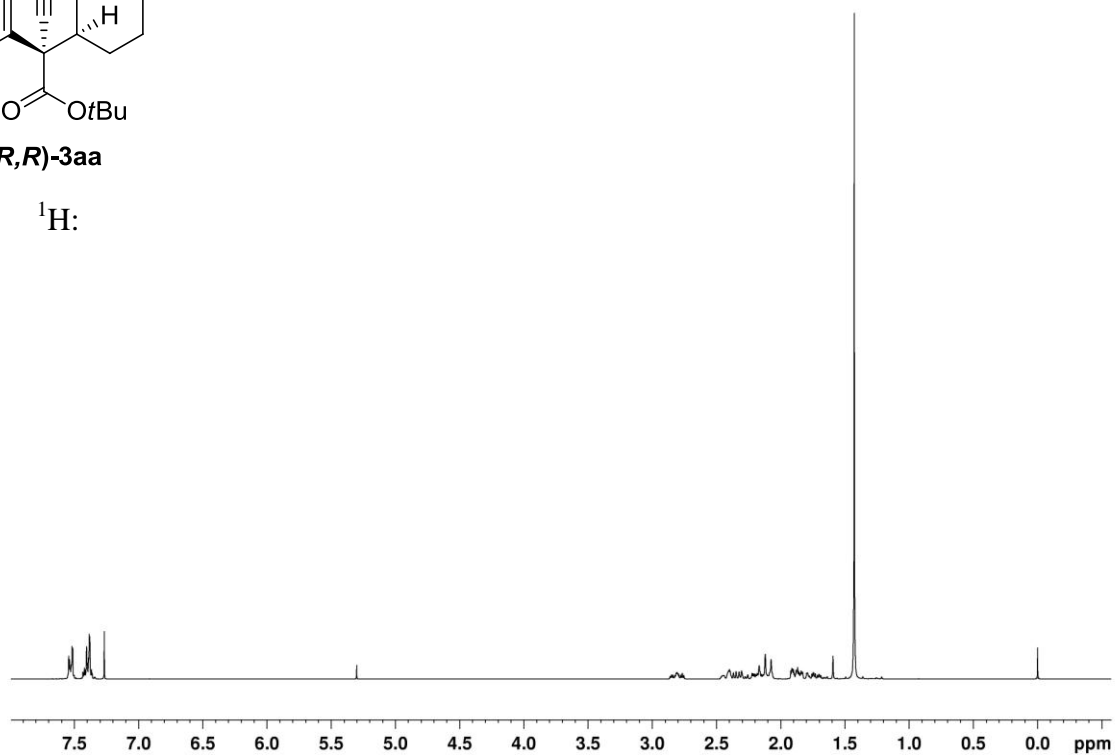

<sup>13</sup>C:

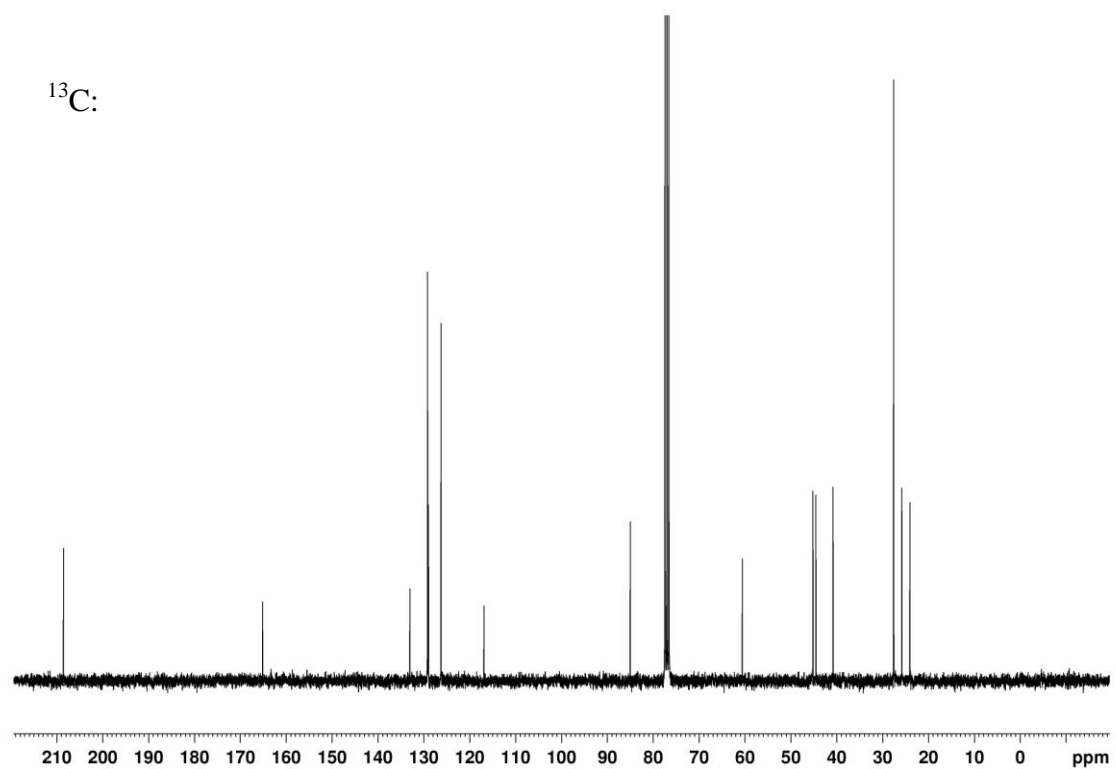

*tert*-Butyl-2-cyano-2-(3-oxocyclohexyl)-2-phenylacetate ((*S,R*)-**3aa**)

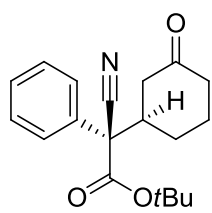

**(*S,R*)-3aa**

$^1\text{H}$ :

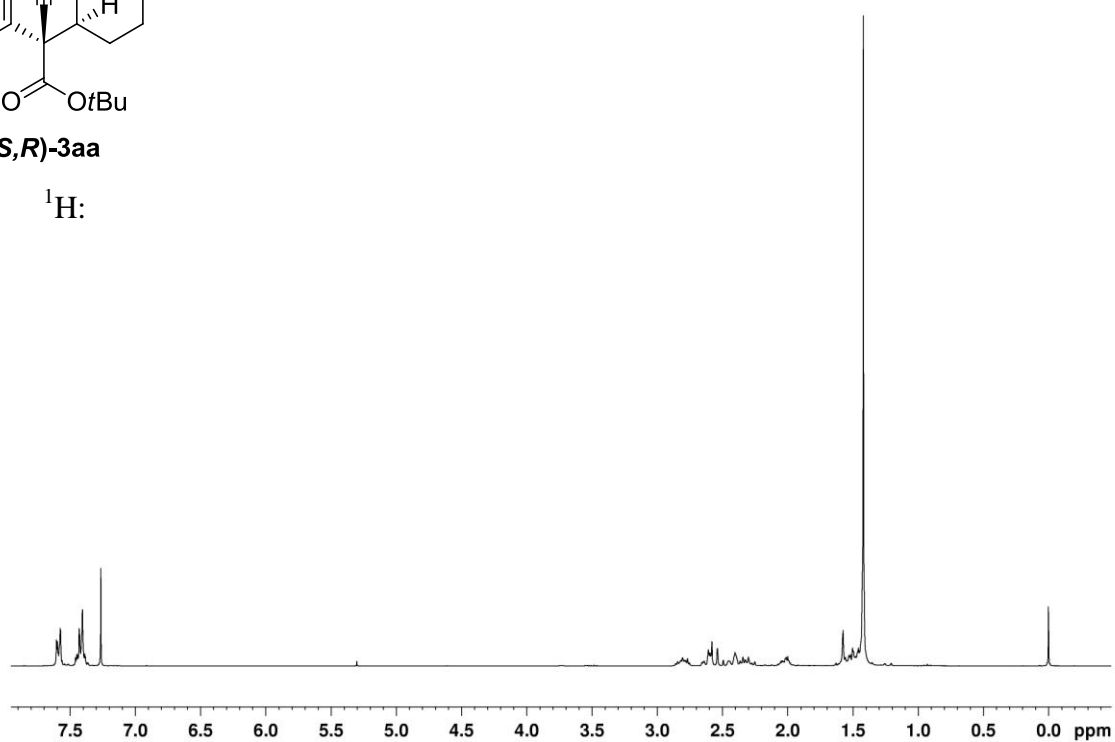

$^{13}\text{C}$ :

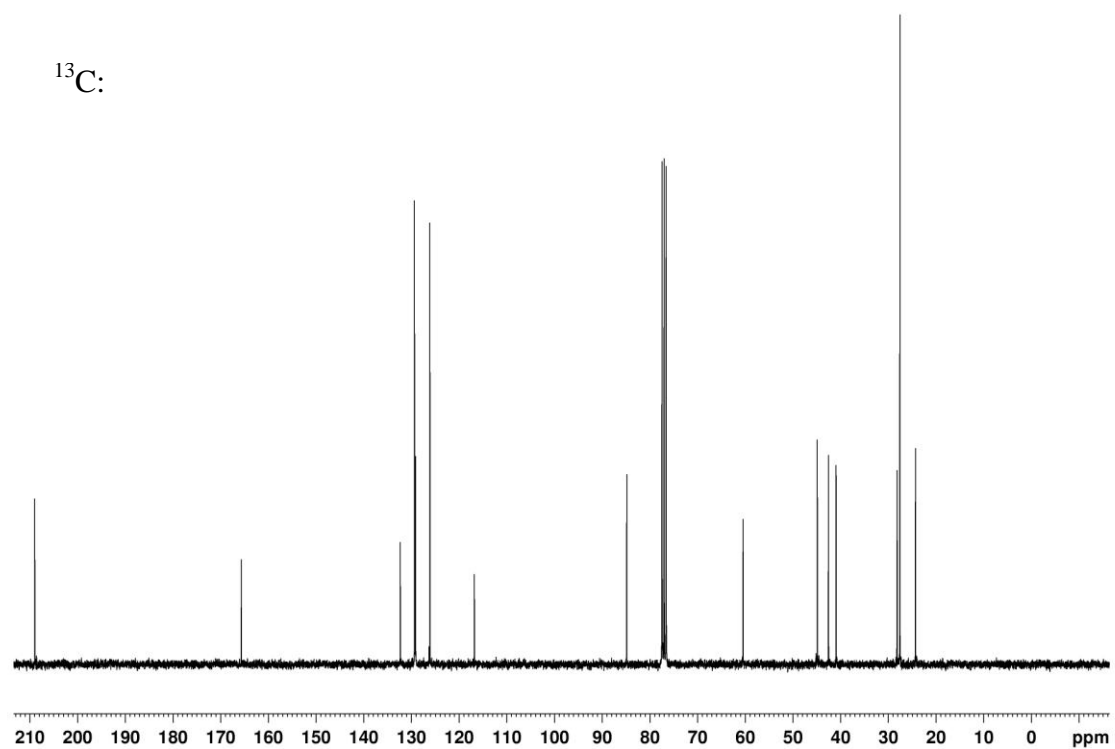

*tert*-Butyl-2-cyano-2-(3-oxocyclohexyl)-2-(3-(trifluoromethyl)phenyl)acetate ((*R,R*)-**3ba**)

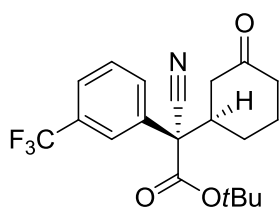

(*R,R*)-**3ba**

<sup>1</sup>H:

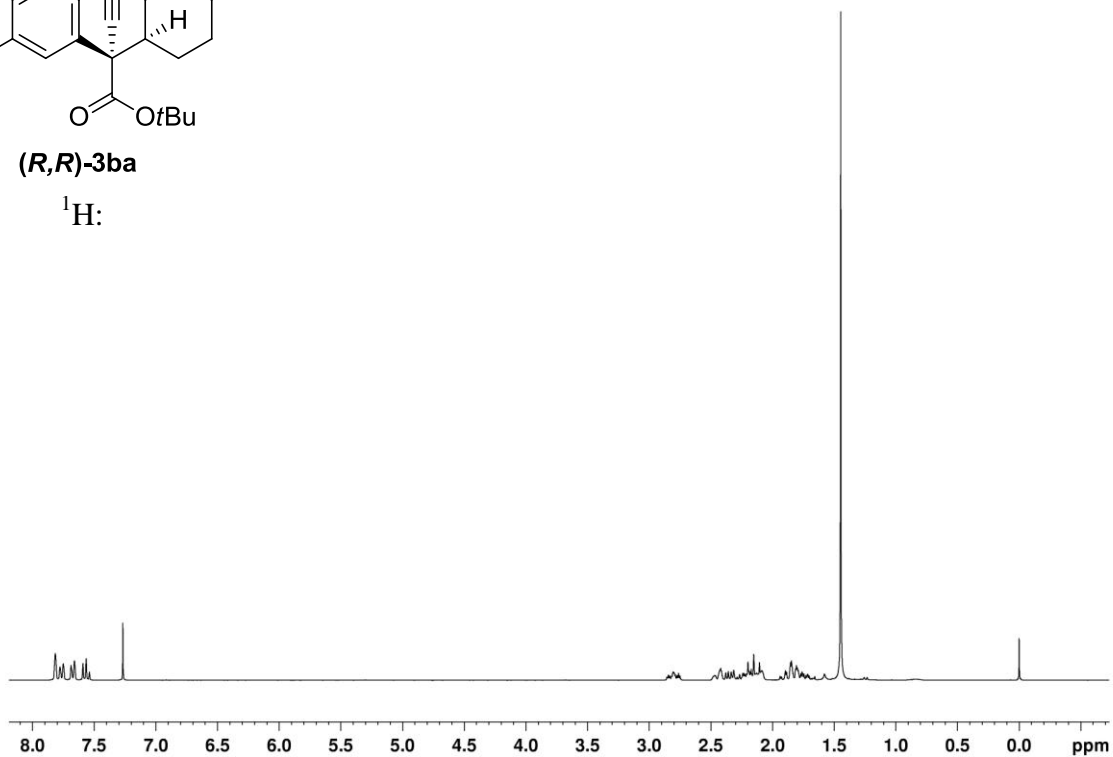

<sup>13</sup>C:

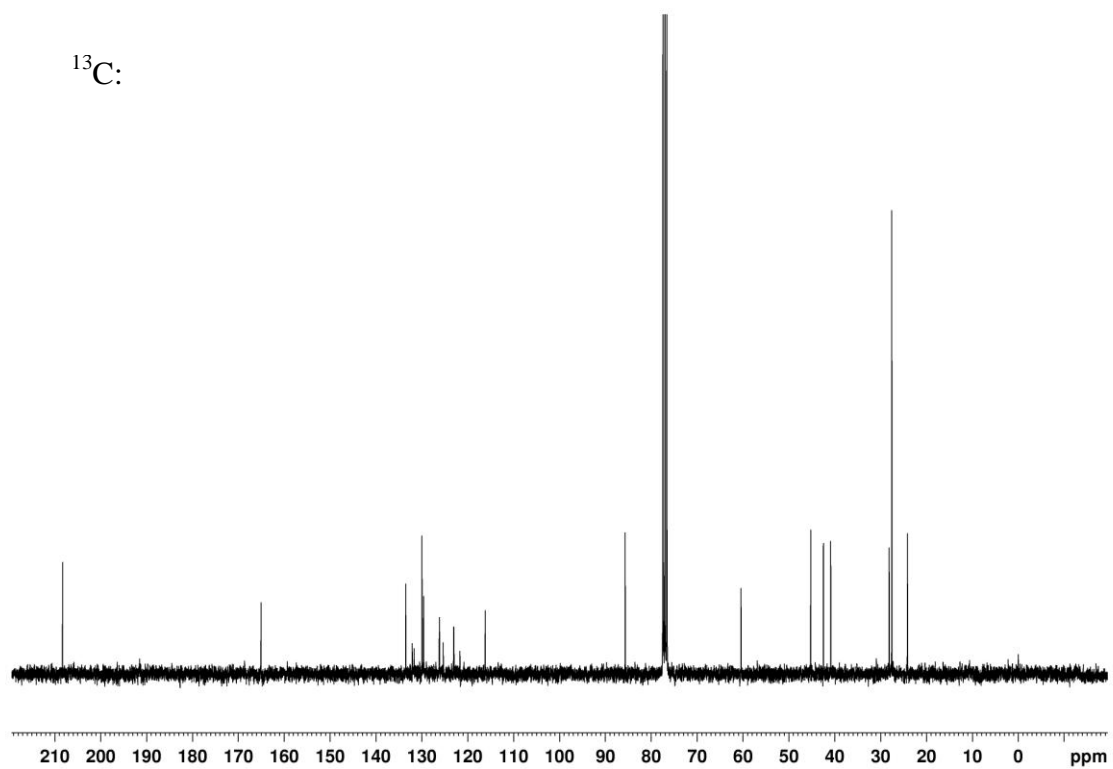

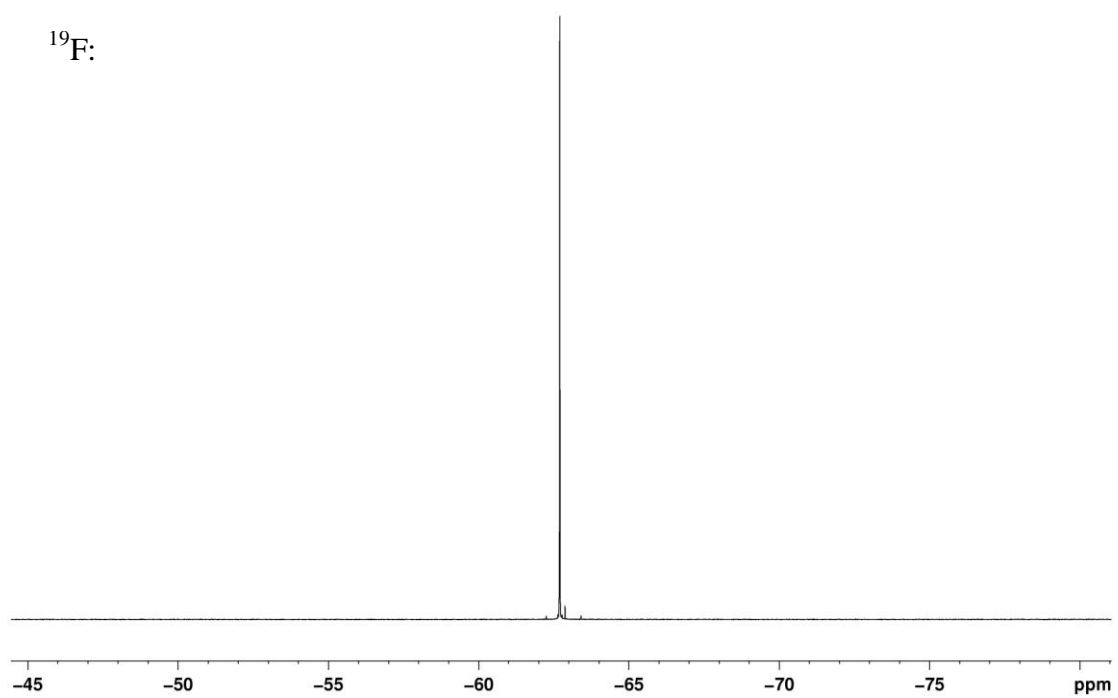

*tert*-Butyl-2-cyano-2-(3-oxocyclohexyl)-2-(3-(trifluoromethyl)phenyl)acetate ((*S,R*)-**3ba**)

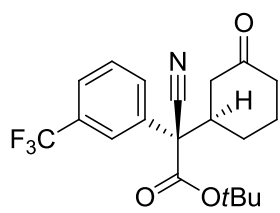

(*S,R*)-**3ba**

<sup>1</sup>H:

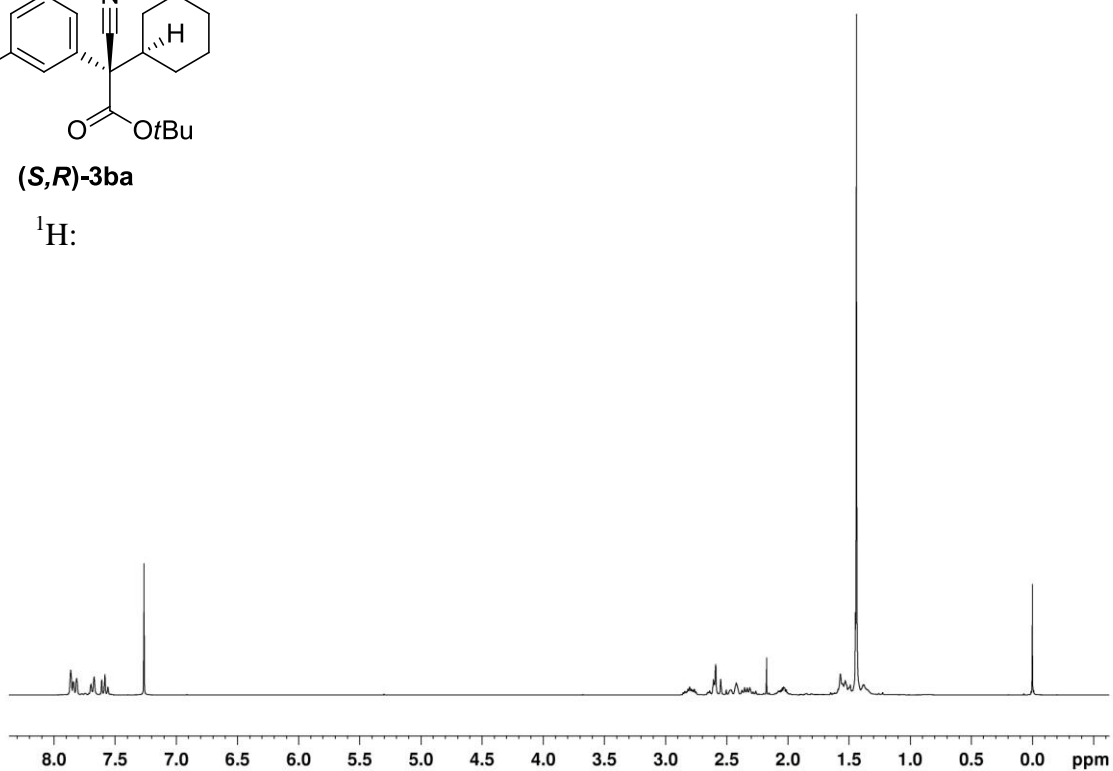

<sup>13</sup>C:

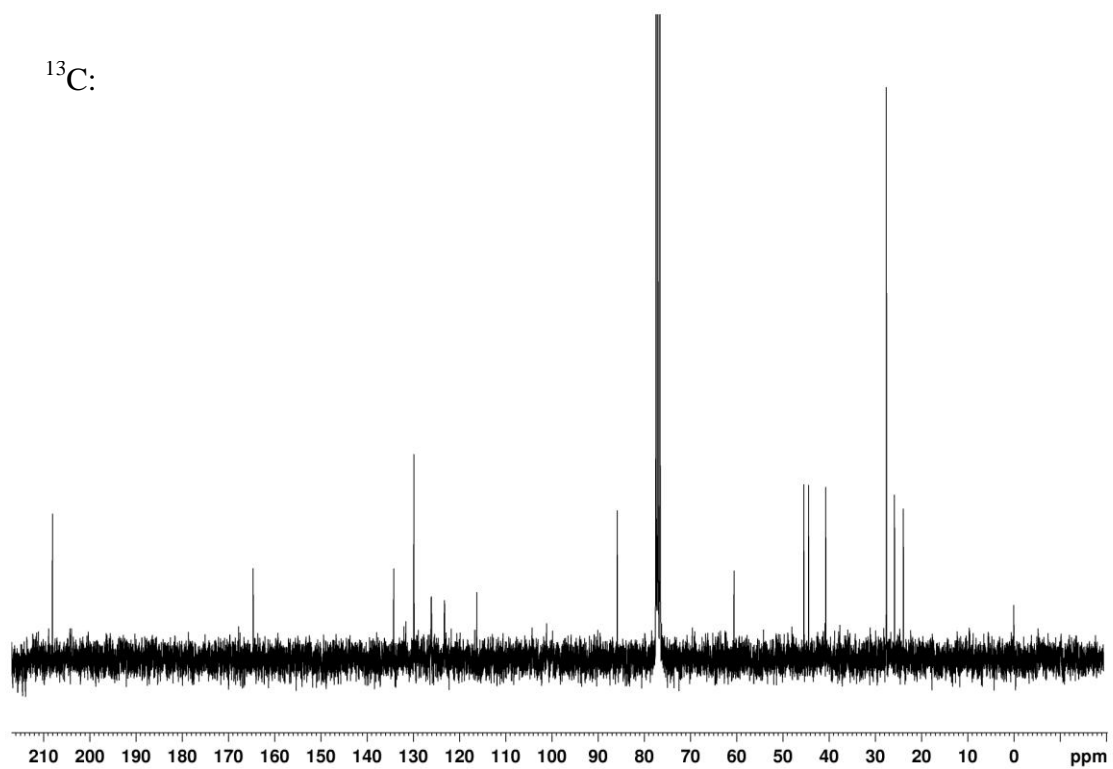

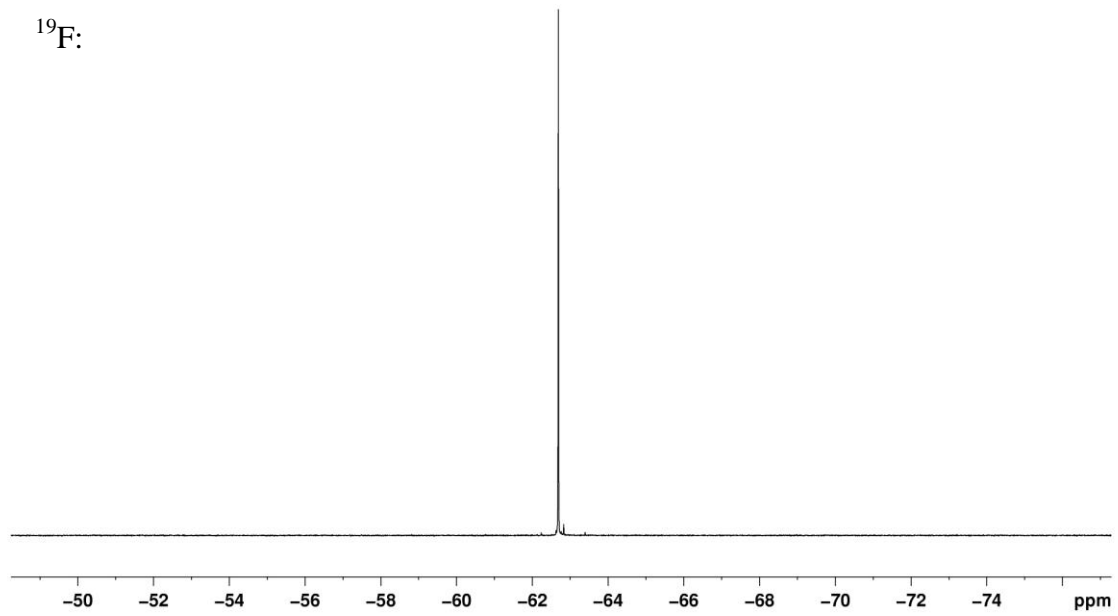



*tert*-Butyl-2-cyano-2-(3-bromophenyl)-2-(3-oxocyclohexyl)acetate ((*R,R*)-**3ca**)

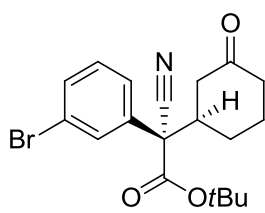

(*R,R*)-**3ca**

<sup>1</sup>H:

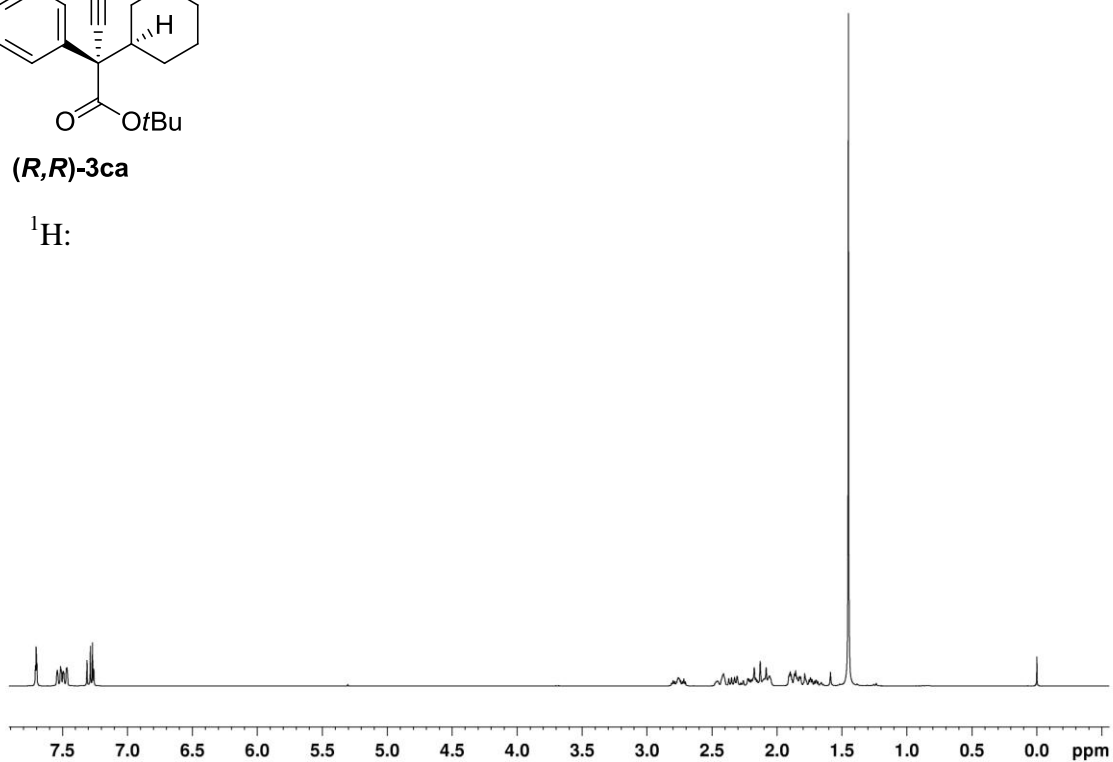

<sup>13</sup>C:

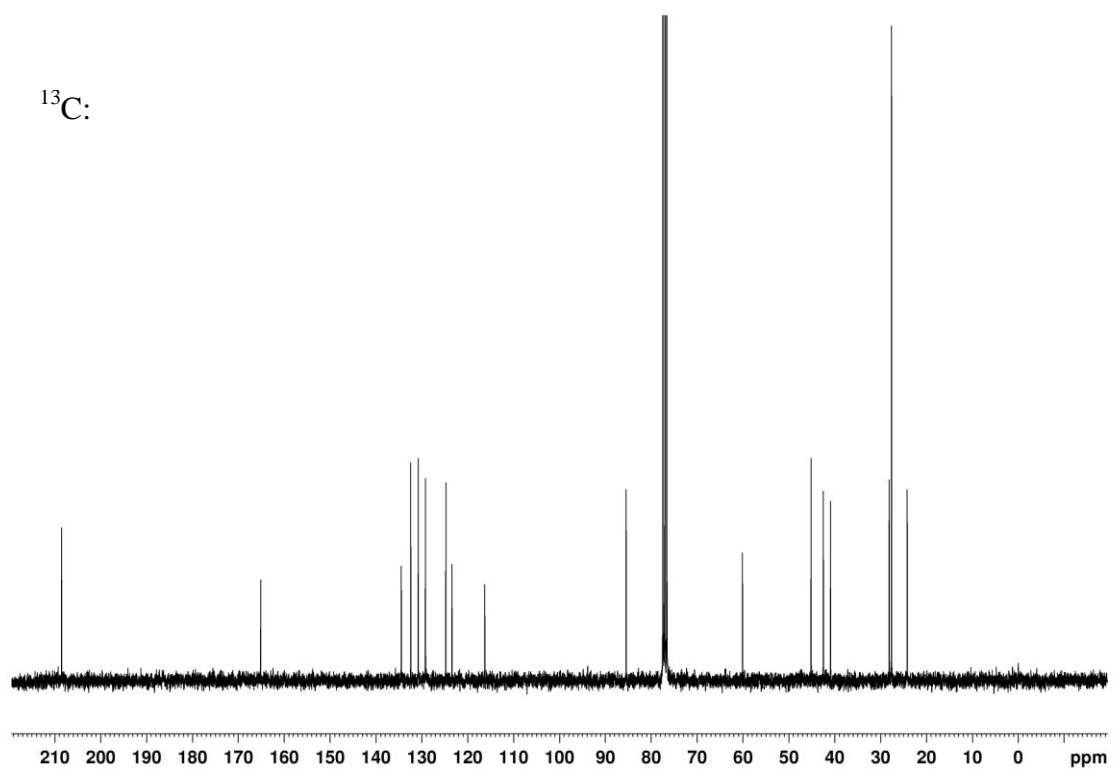

*tert*-Butyl-2-cyano-2-(3-bromophenyl)-2-(3-oxocyclohexyl)acetate ((*S,R*)-**3ca**)

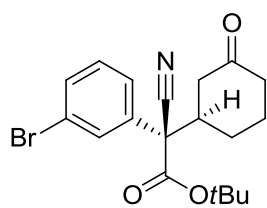

(*S,R*)-**3ca**

$^1\text{H}$ :

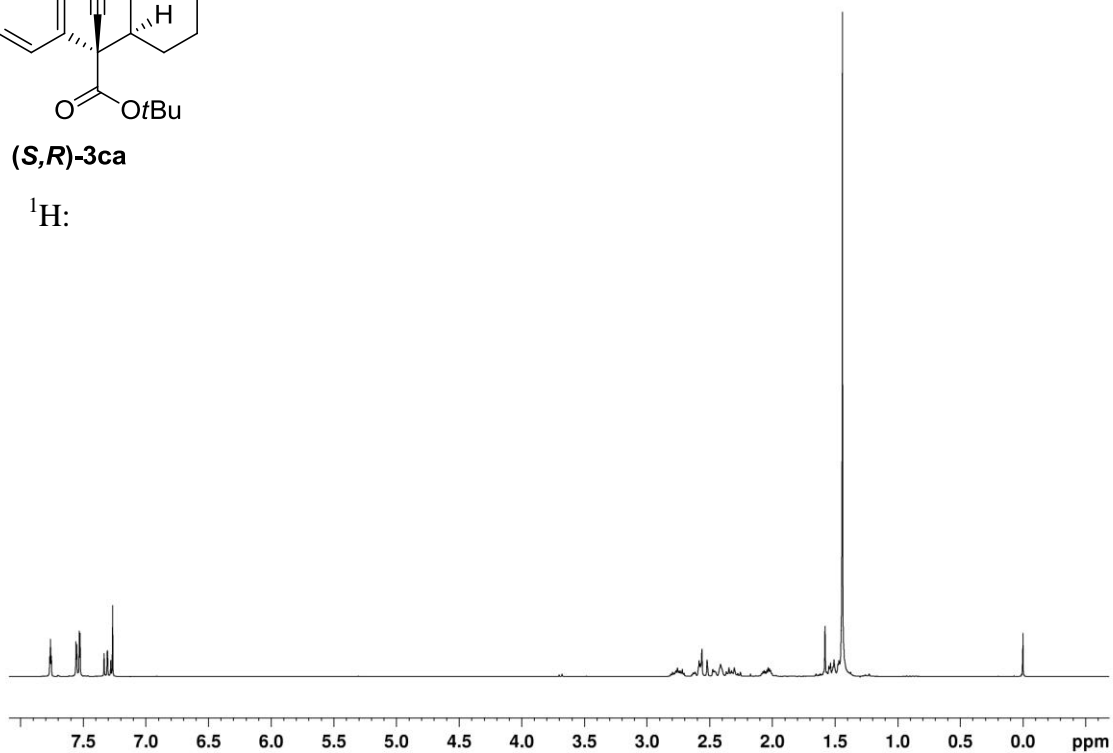

$^{13}\text{C}$ :

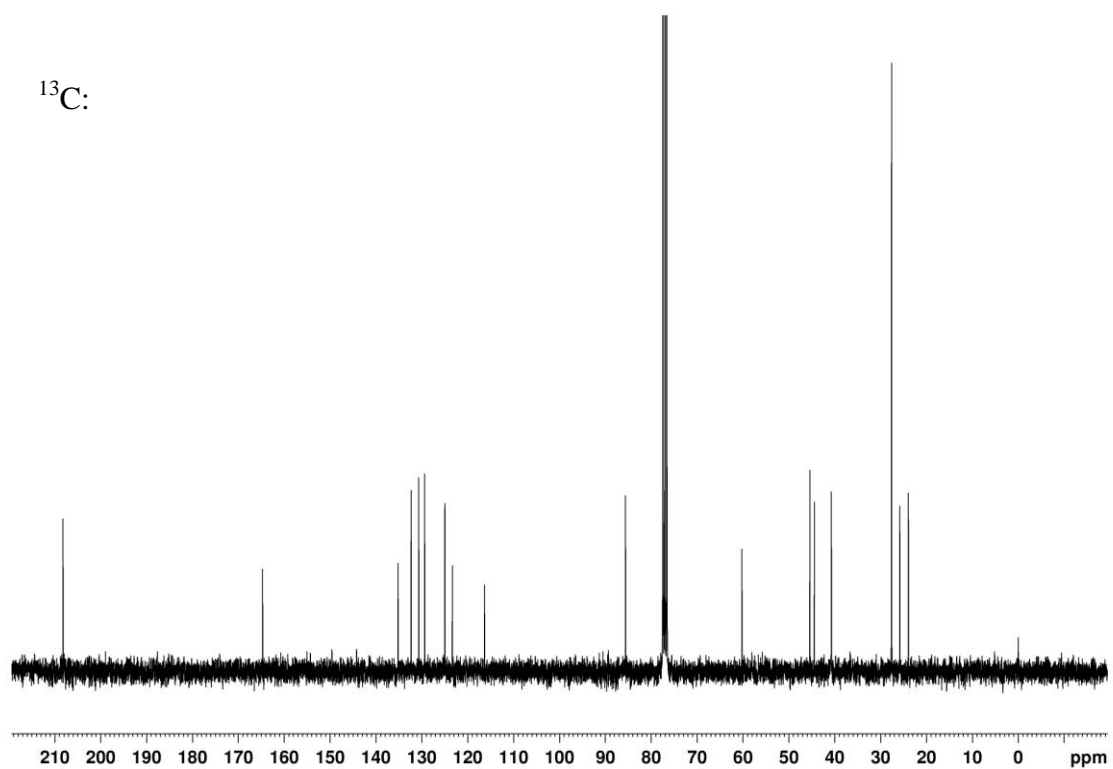

*tert*-Butyl-2-cyano-2-(3-chlorophenyl)-2-(3-oxocyclohexyl)acetate ((*R,R*)-**3da**)

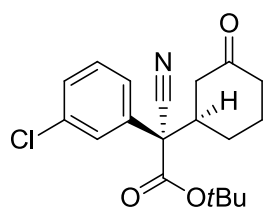

**(*R,R*)-3da**

$^1\text{H}$ :

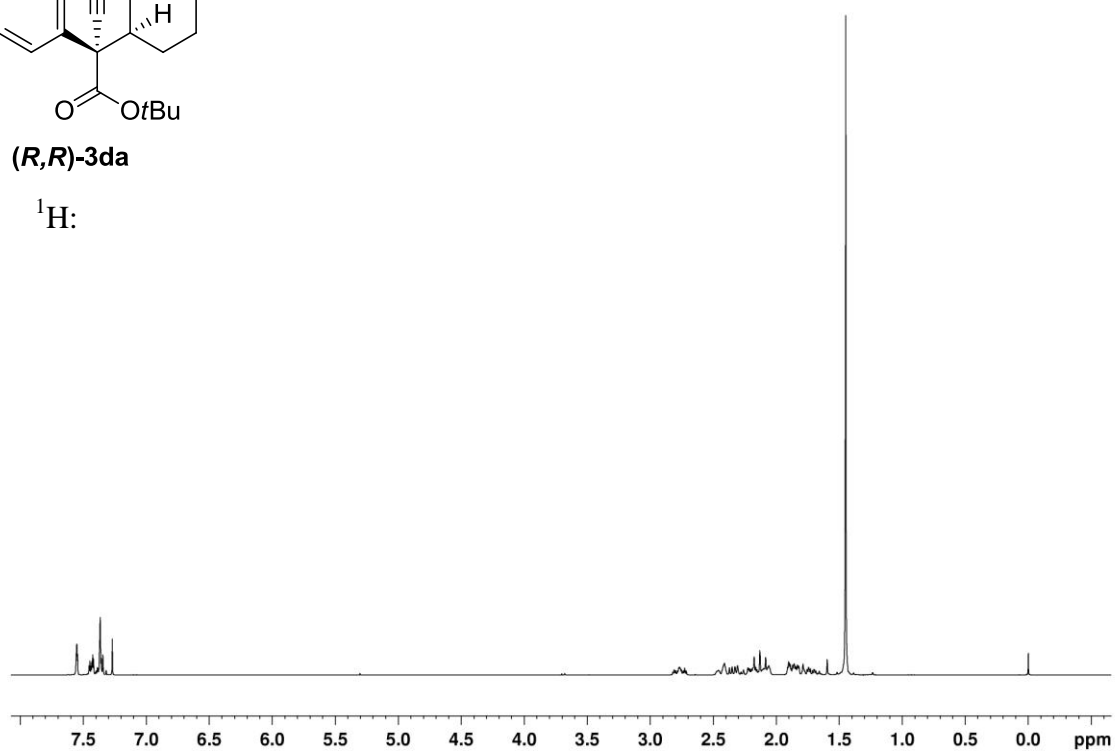

$^{13}\text{C}$ :

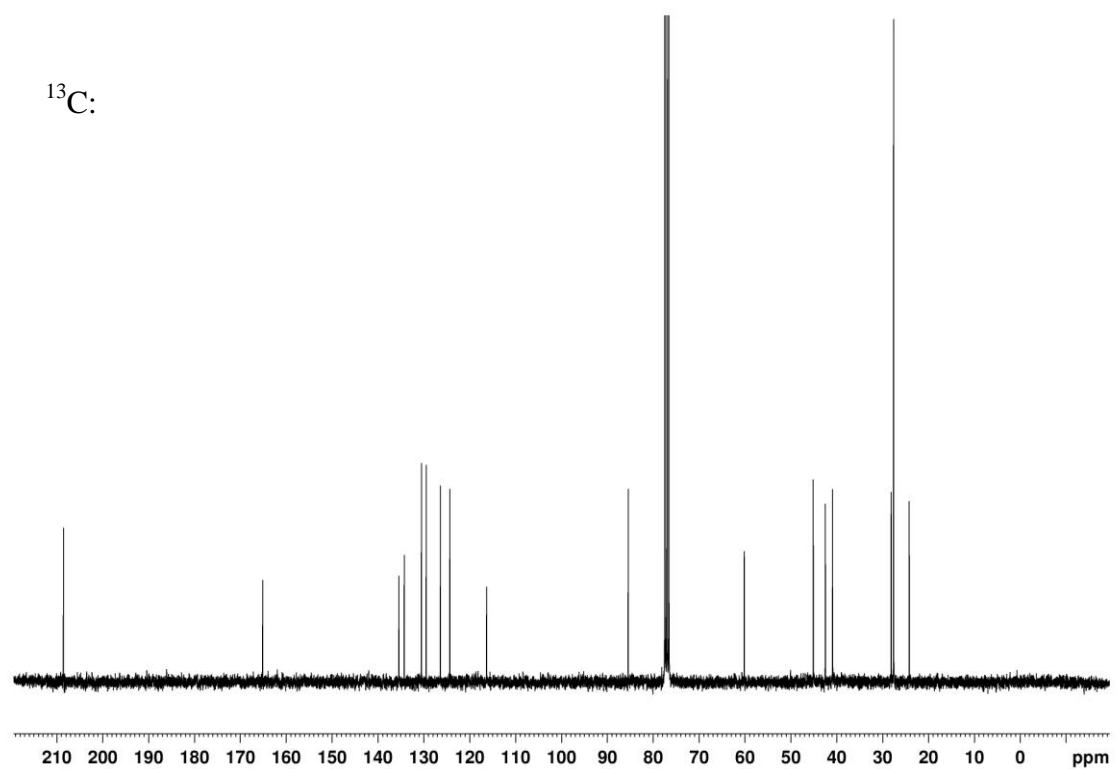

*tert*-Butyl-2-cyano-2-(3-chlorophenyl)-2-(3-oxocyclohexyl)acetate ((*S,R*)-**3da**)

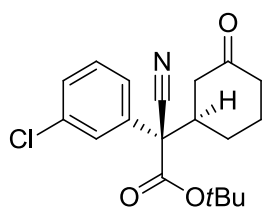

(*S,R*)-**3da**

$^1\text{H}$ :

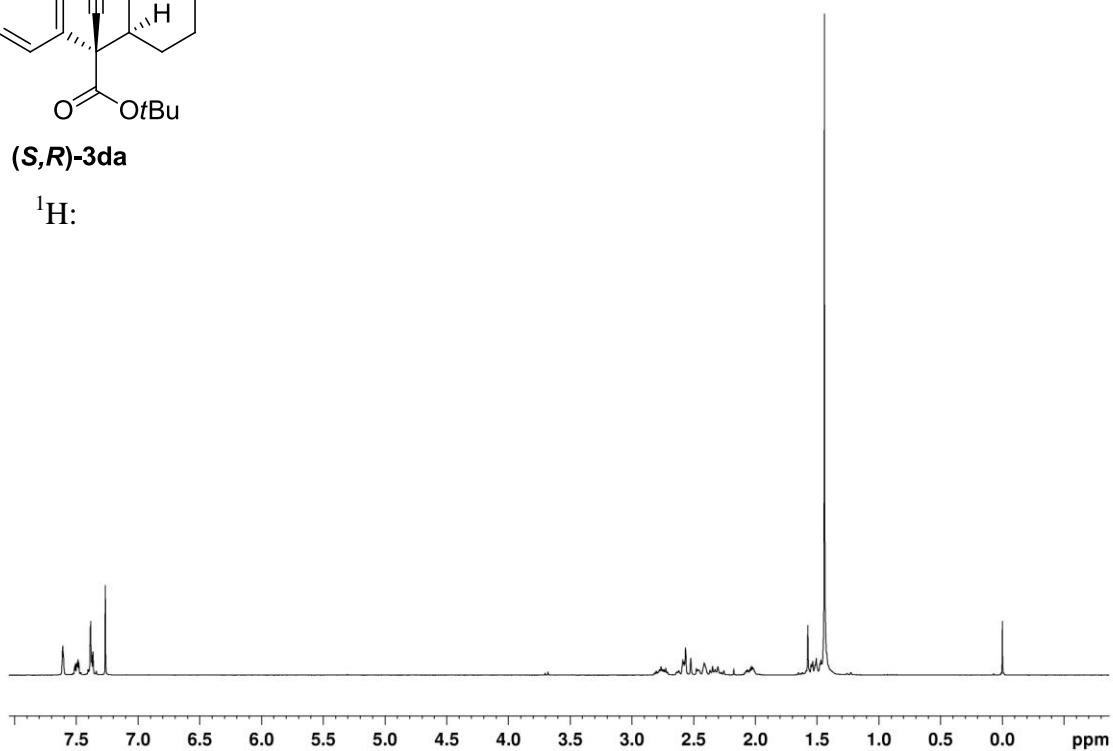

$^{13}\text{C}$ :

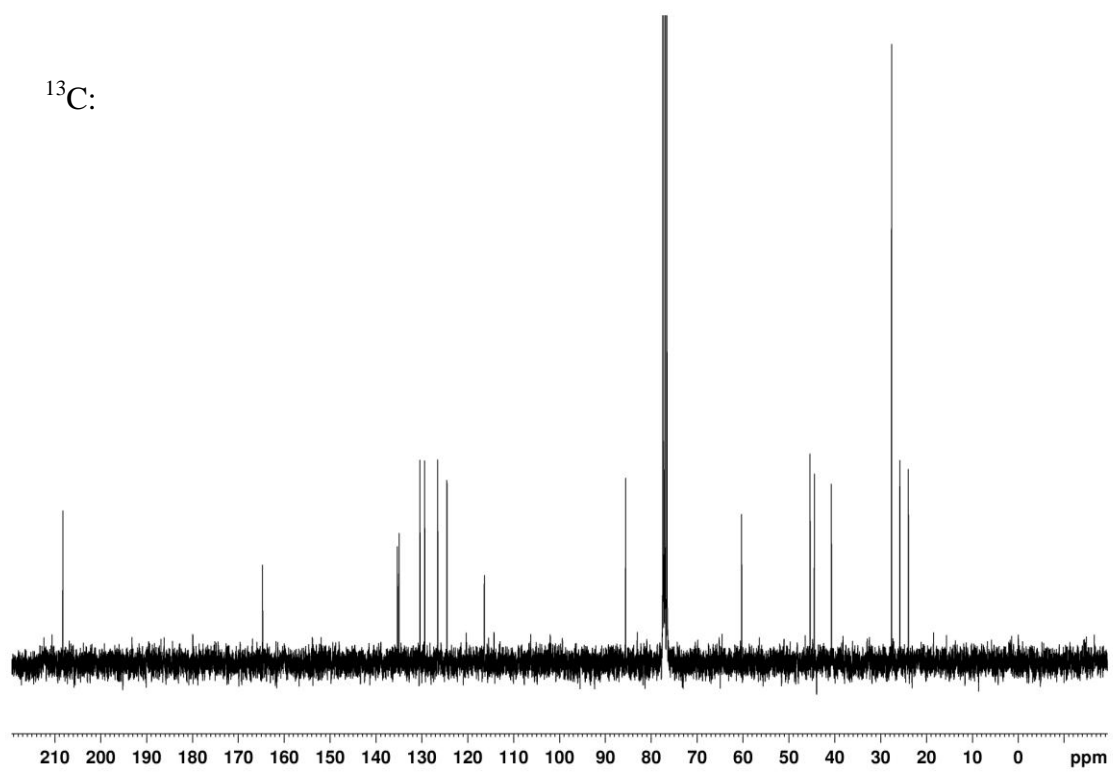

*tert*-Butyl-2-cyano-2-(3-methoxyphenyl)-2-(3-oxocyclohexyl)-acetate ((*R,R*)-**3ea**)

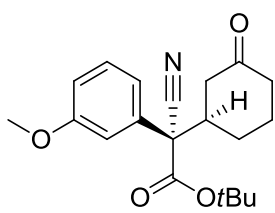

(*R,R*)-**3ea**

$^1\text{H}$ :

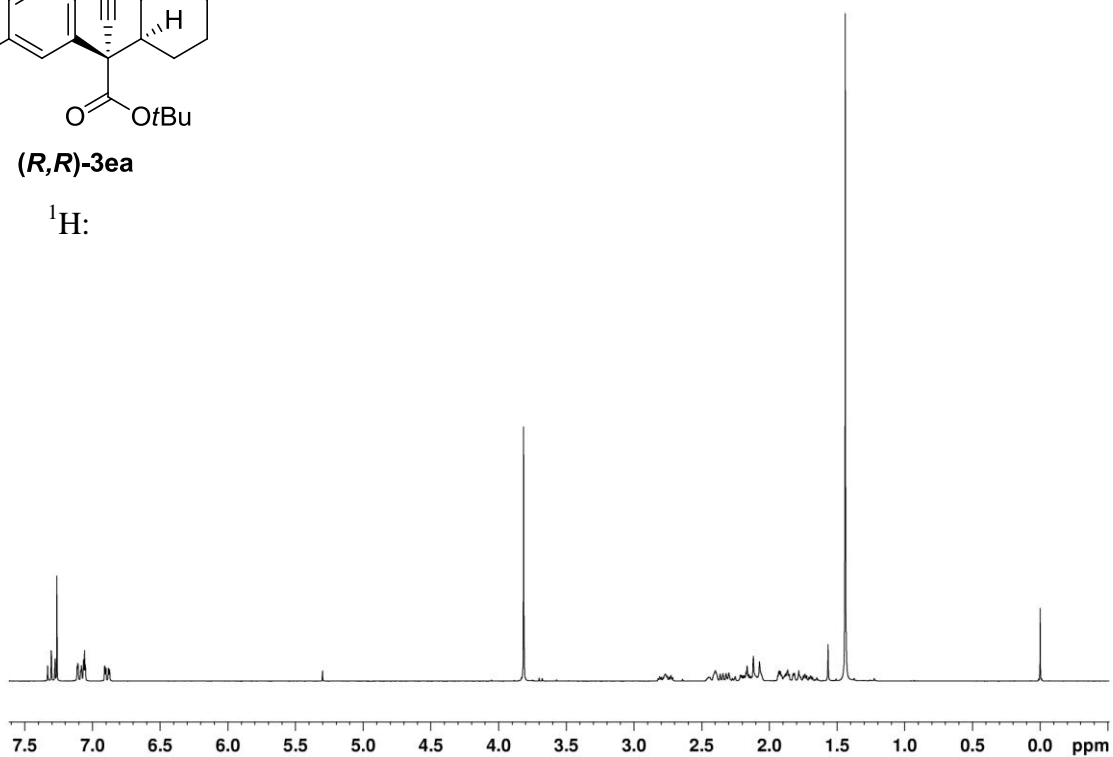

$^{13}\text{C}$ :

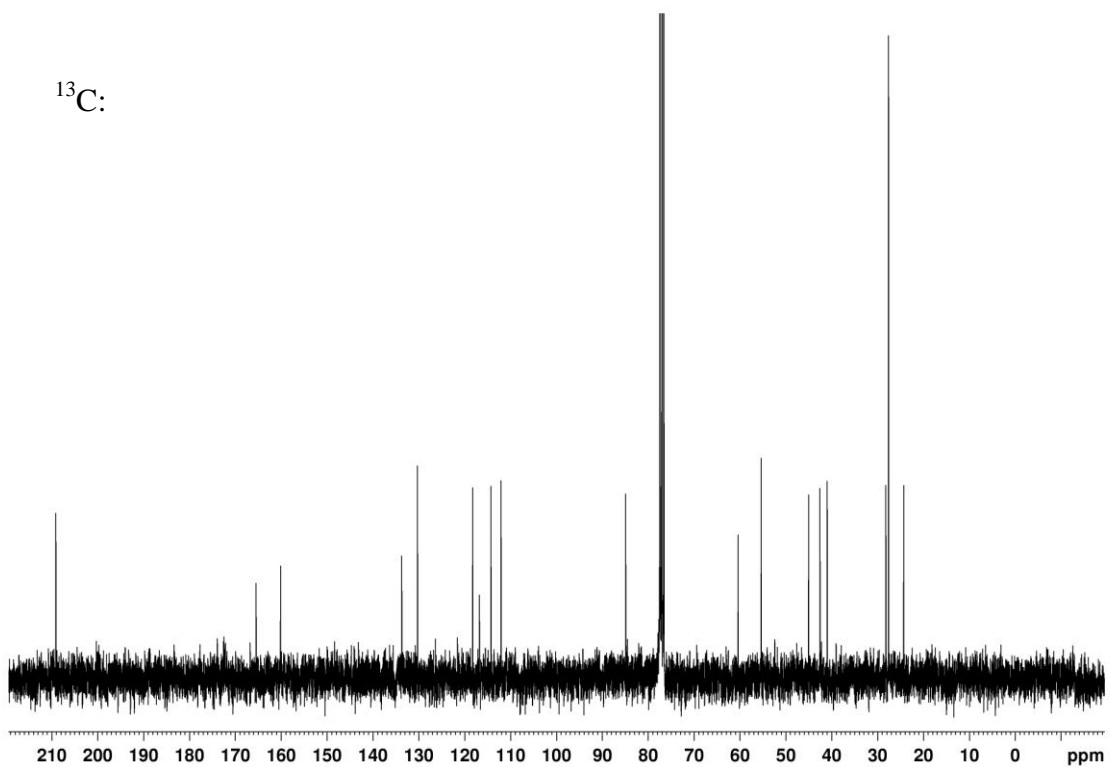

*tert*-Butyl-2-cyano-2-(3-methoxyphenyl)-2-(3-oxocyclohexyl)-acetate ((*S,R*)-**3ea**)

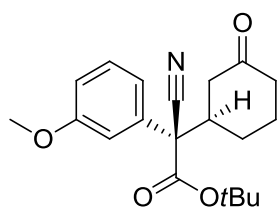

**(*S,R*)-3ea**

$^1\text{H}$ :

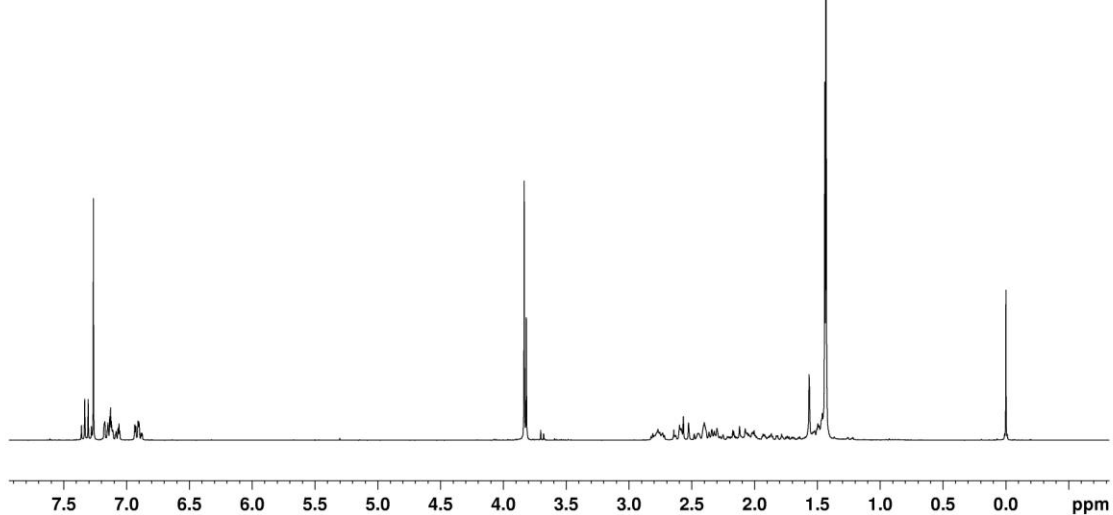

$^{13}\text{C}$ :

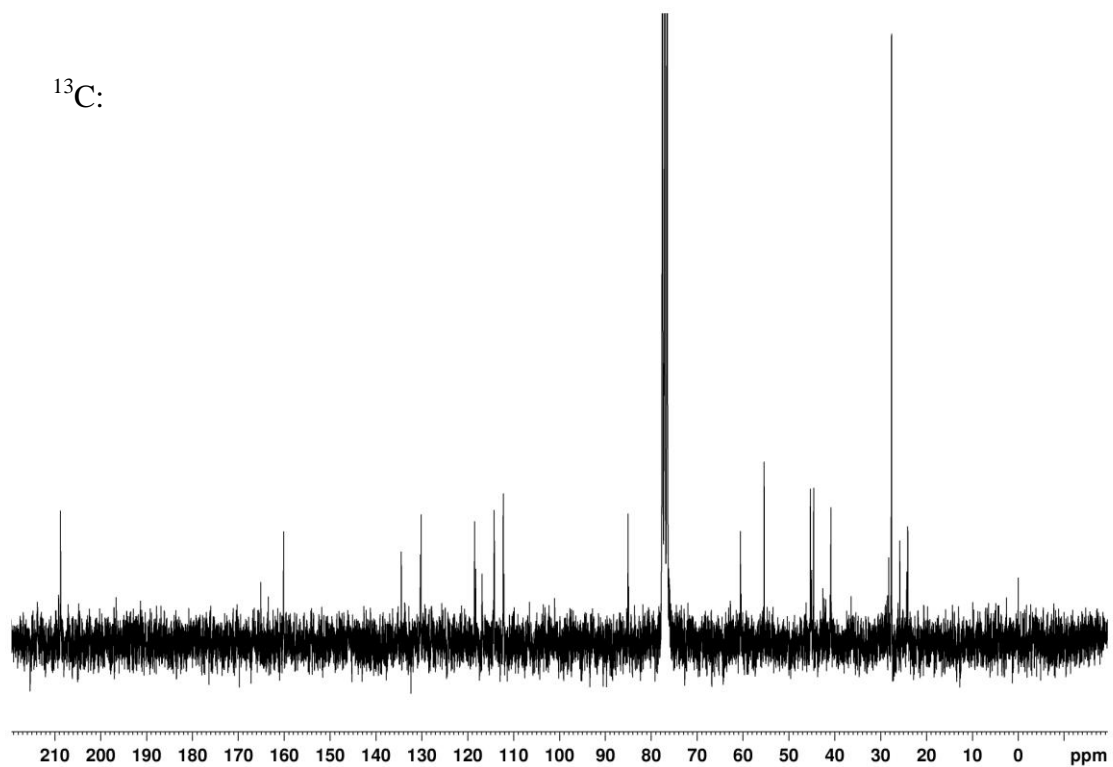

*tert*-Butyl-2-cyano-2-(3-oxocyclohexyl)-2-(*m*-tolyl)-acetate ((*R,R*)-**3fa**)

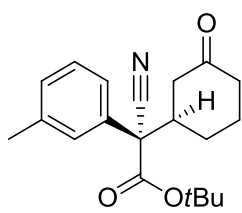

**(*R,R*)-3fa**

<sup>1</sup>H:

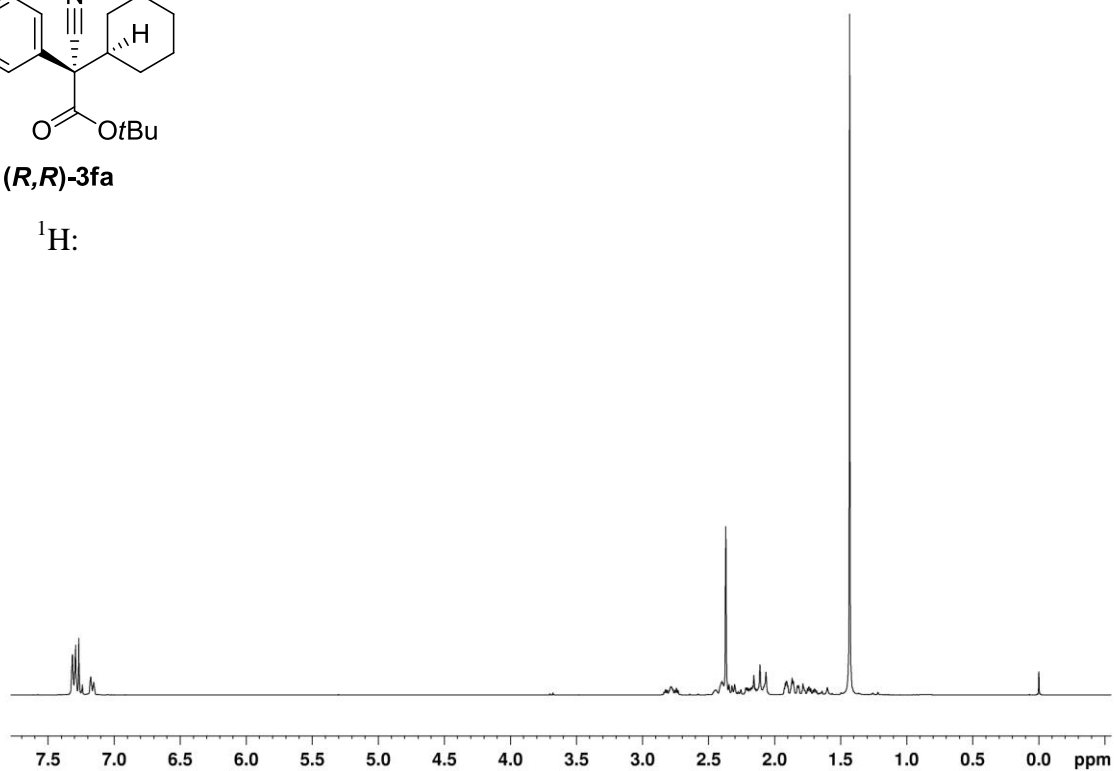

<sup>13</sup>C:

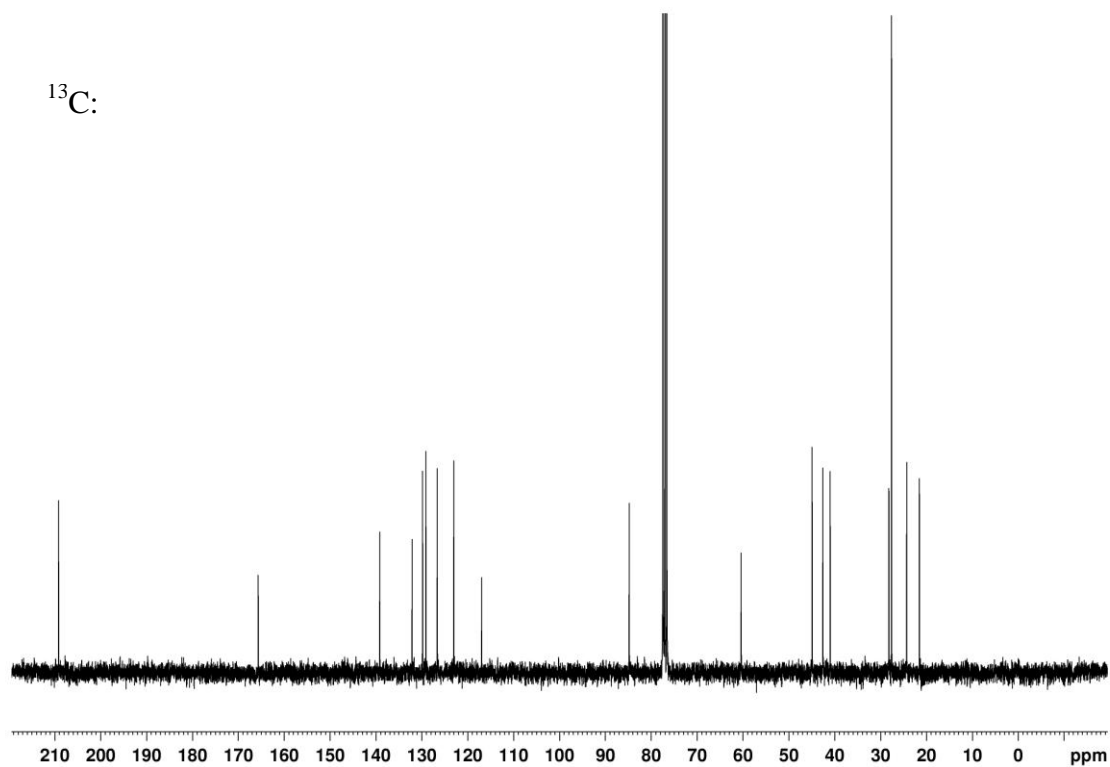

*tert*-Butyl-2-cyano-2-(3-oxocyclohexyl)-2-(*m*-tolyl)-acetate ((*S,R*)-**3fa**)

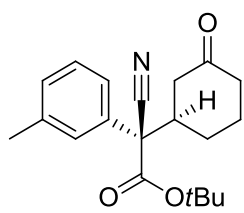

**(*S,R*)-3fa**

$^1\text{H}$ :

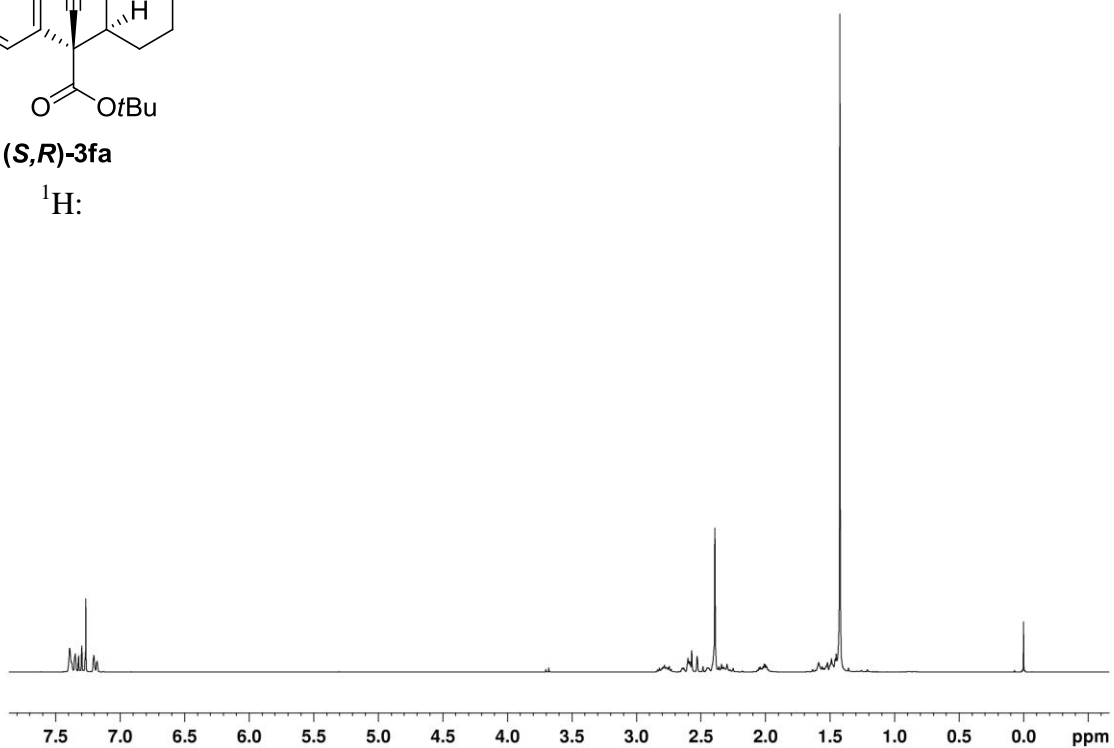

$^{13}\text{C}$ :

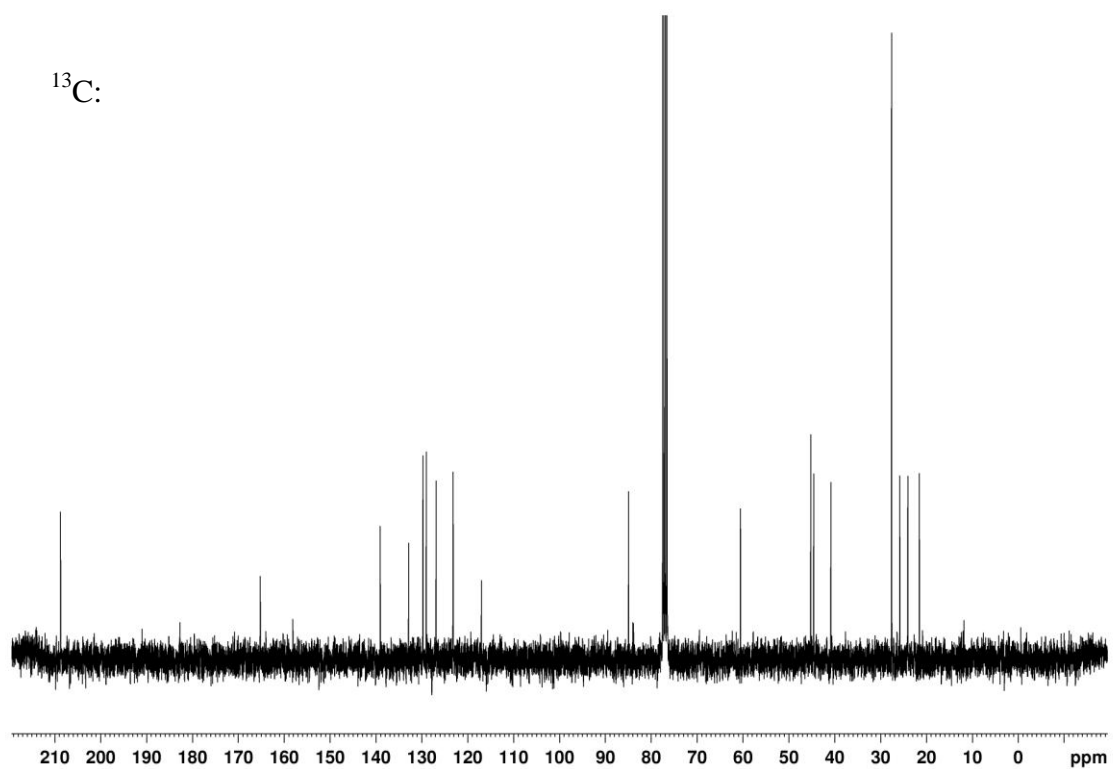



*tert*-Butyl-2-cyano-2-(4-fluorophenyl)-2-(3-oxocyclohexyl)-acetate ((*R,R*)-**3ga**)

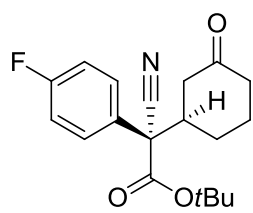

(*R,R*)-**3ga**

$^1\text{H}$ :

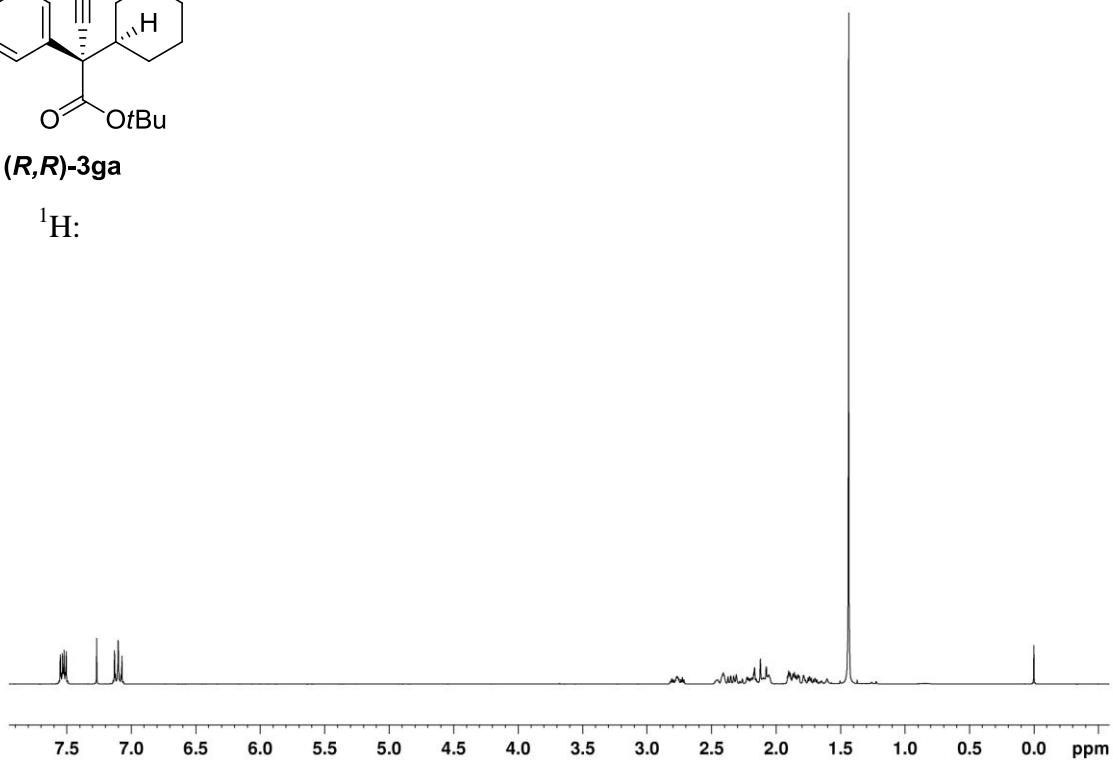

$^{13}\text{C}$ :

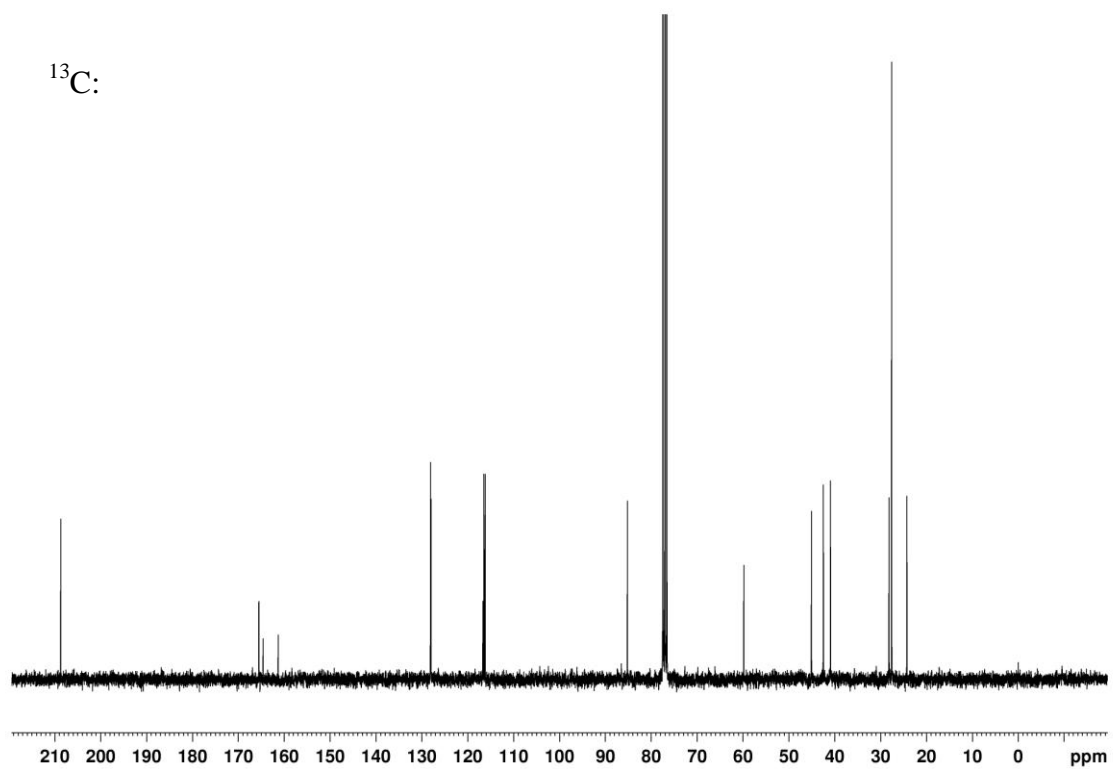

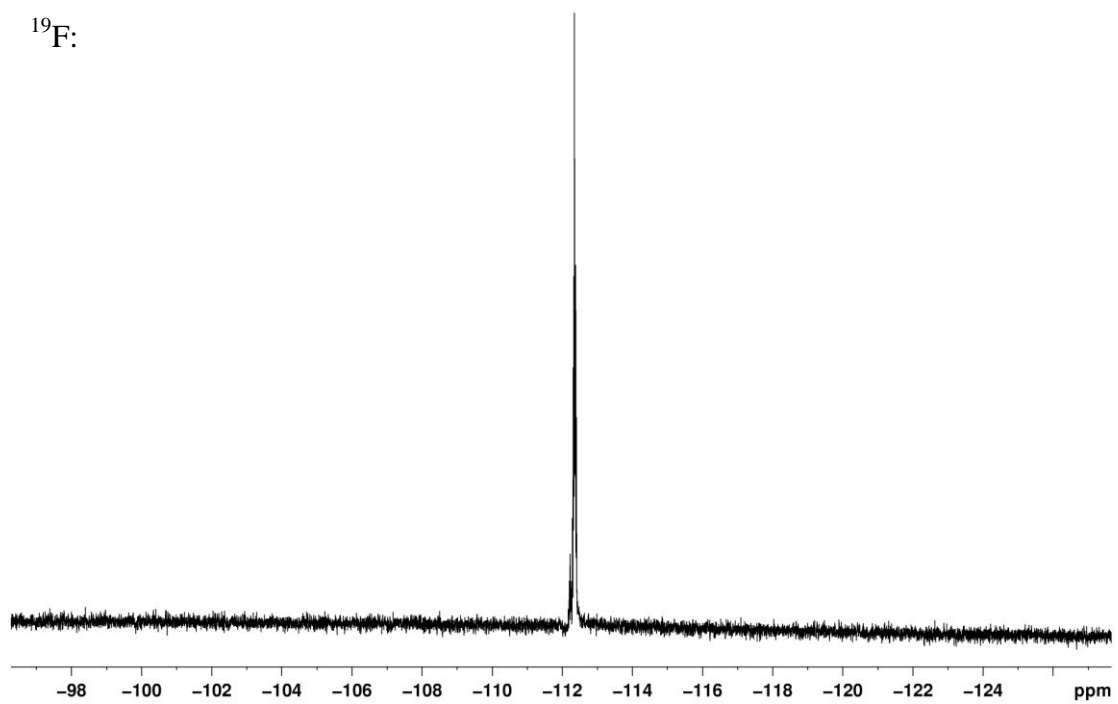

*tert*-Butyl-2-cyano-2-(4-fluorophenyl)-2-(3-oxocyclohexyl)-acetate ((*S,R*)-**3ga**)

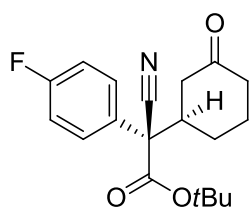

(*S,R*)-**3ga**

<sup>1</sup>H:

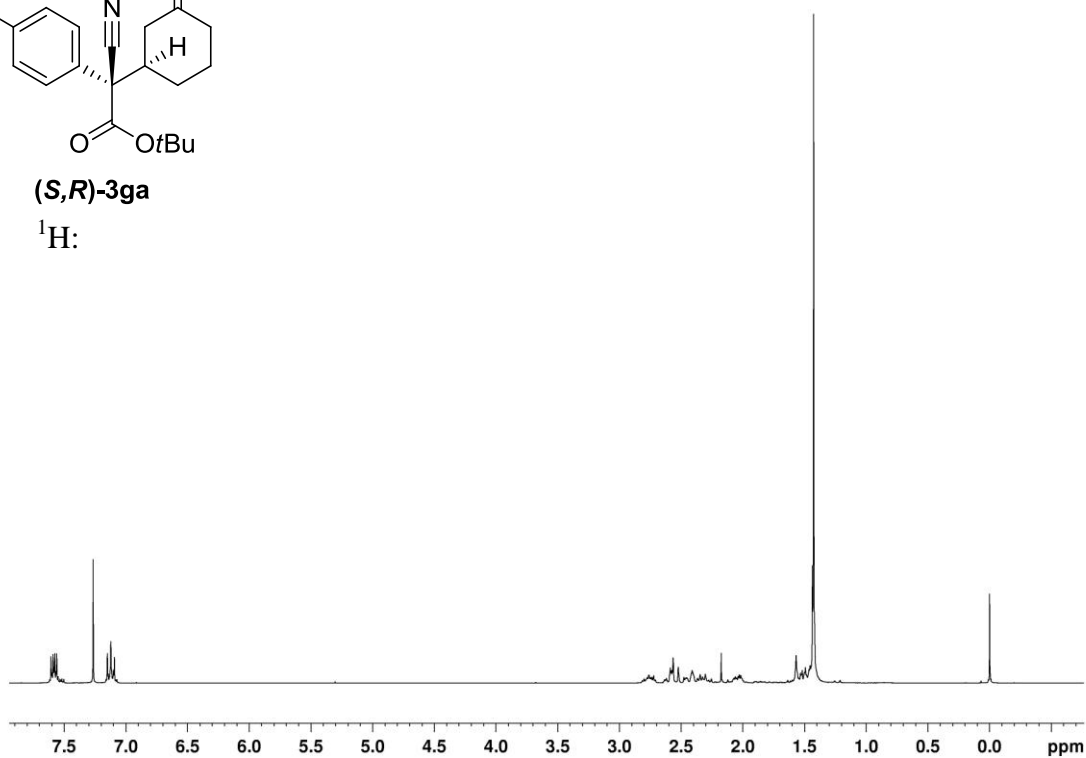

<sup>13</sup>C:

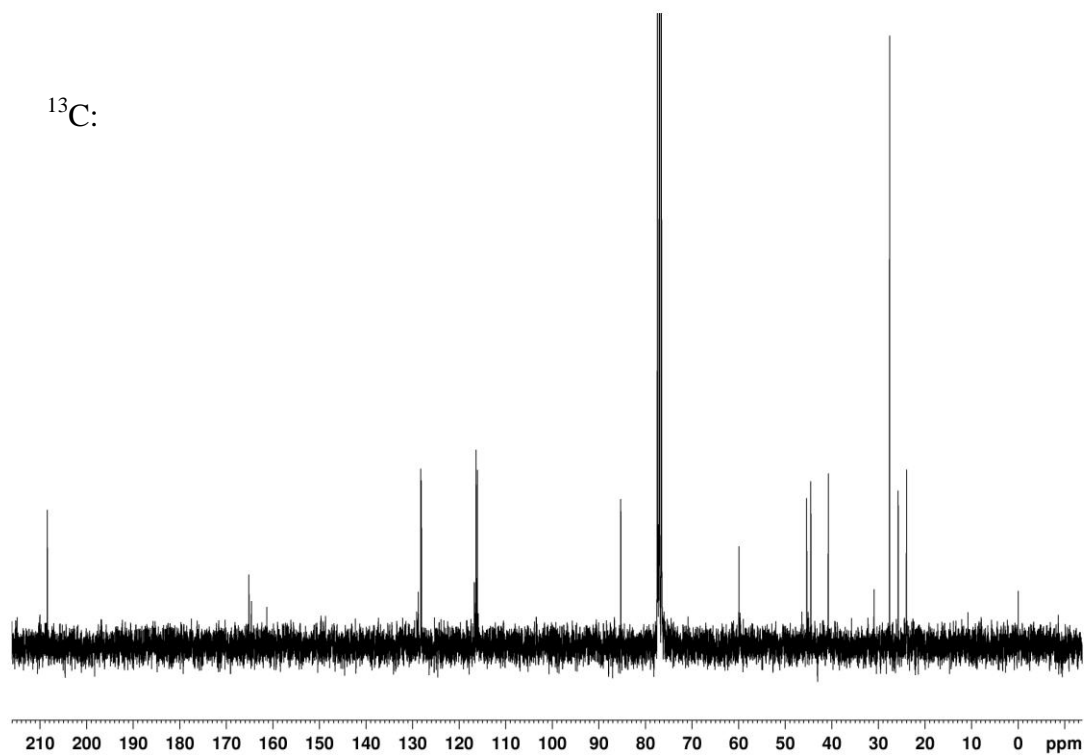

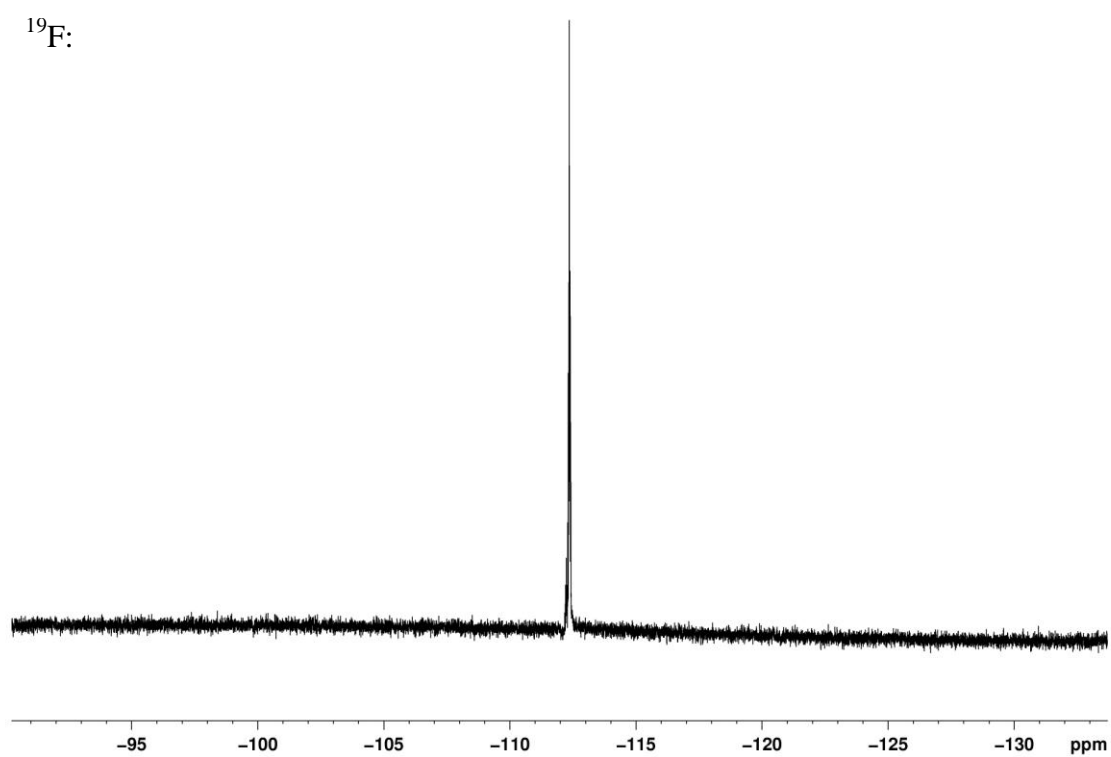

*tert*-Butyl-2-cyano-2-(4-chlorophenyl)-2-(3-oxocyclohexyl)-acetate ((*R,R*)-**3ha**)

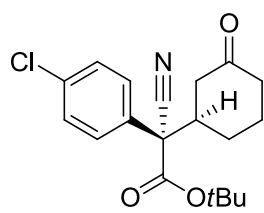

**(*R,R*)-3ha**

$^1\text{H}$ :

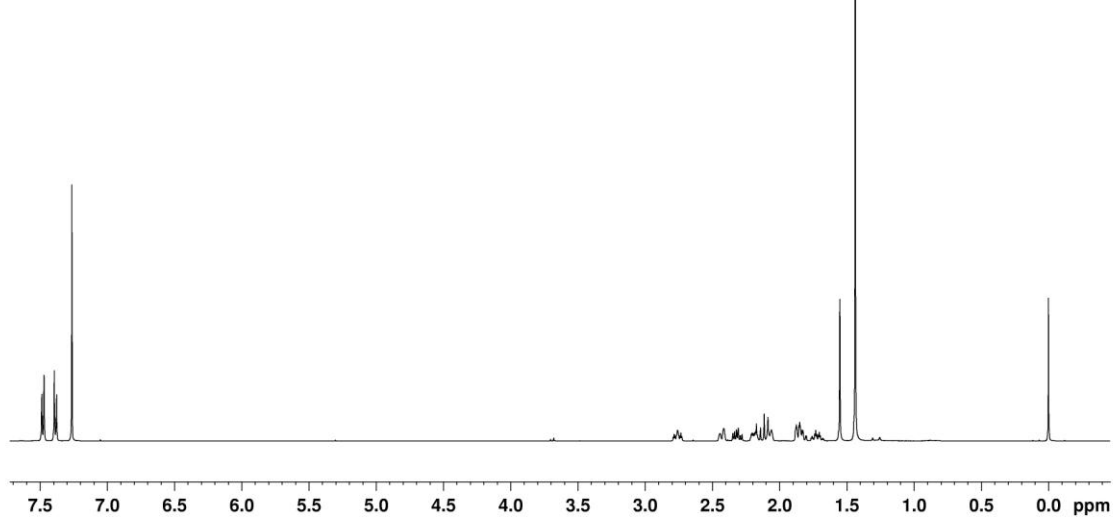

$^{13}\text{C}$ :

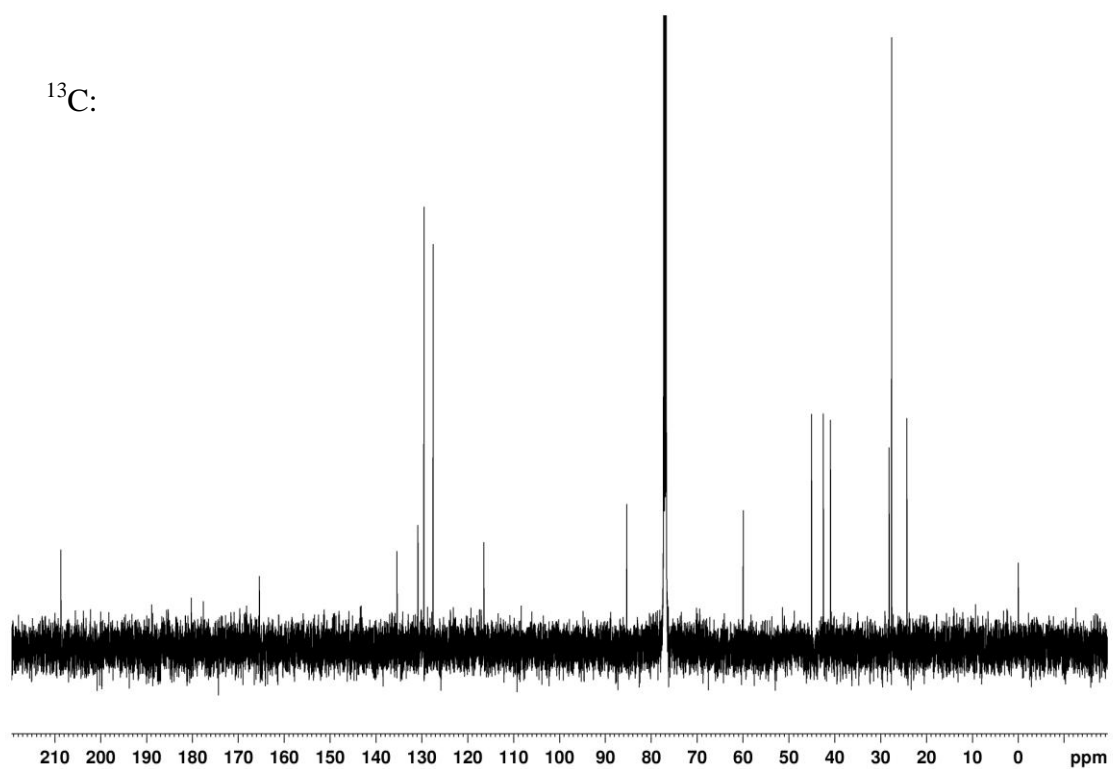

*tert*-Butyl-2-cyano-2-(4-chlorophenyl)-2-(3-oxocyclohexyl)-acetate ((*S,R*)-**3ha**)

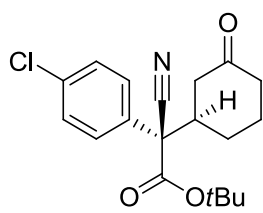

(*S,R*)-**3ha**

$^1\text{H}$ :

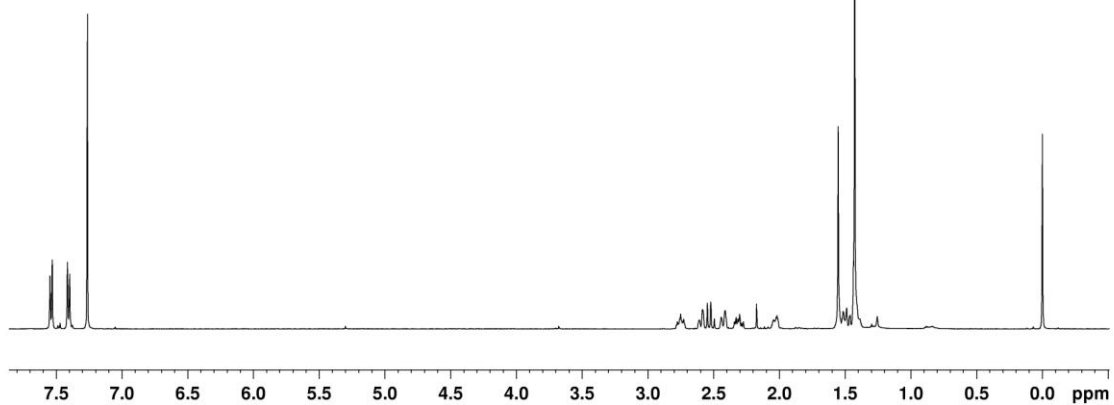

$^{13}\text{C}$ :

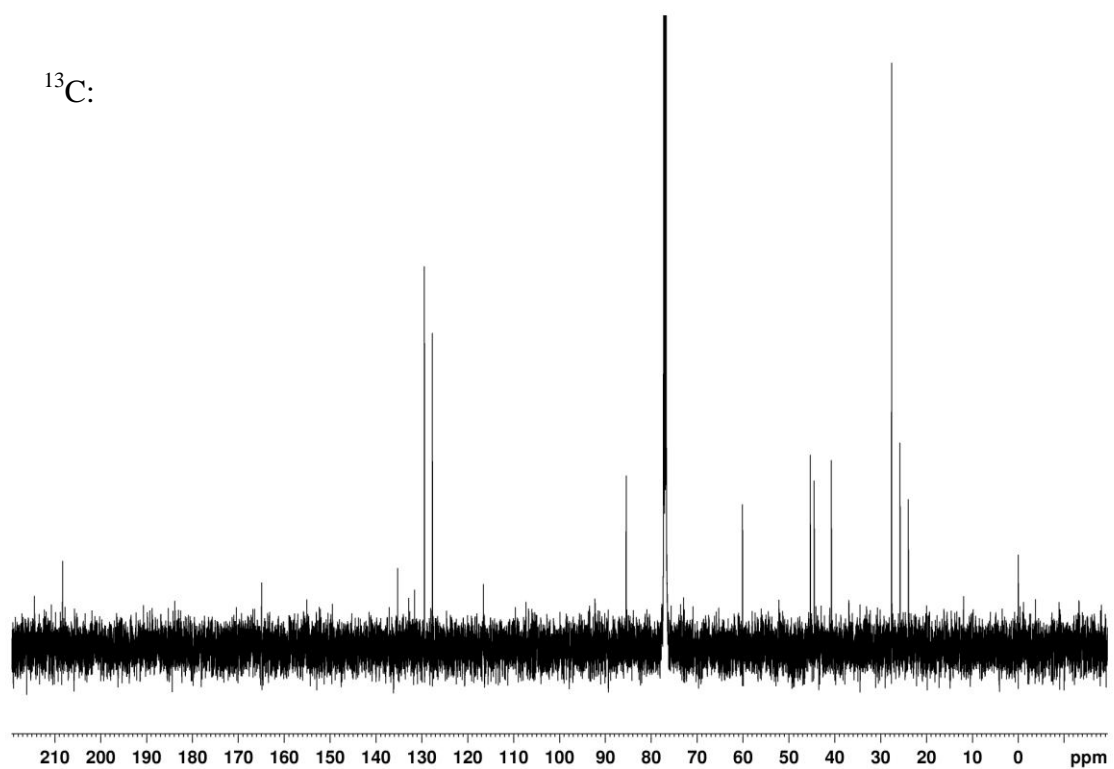

*tert*-Butyl-2-cyano-2-(4-bromophenyl)-2-(3-oxocyclohexyl)-acetate ((*R,R*)-**3ia**)

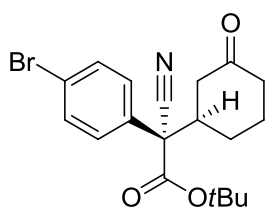

(*R,R*)-**3ia**

<sup>1</sup>H:

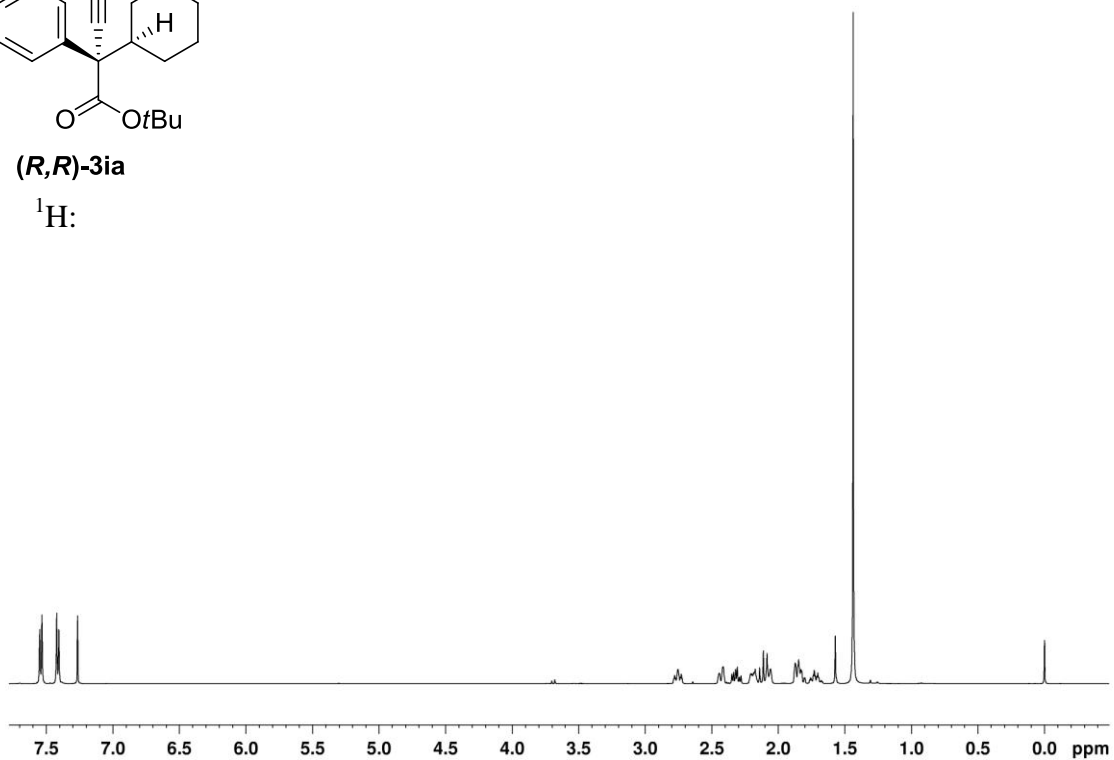

<sup>13</sup>C:

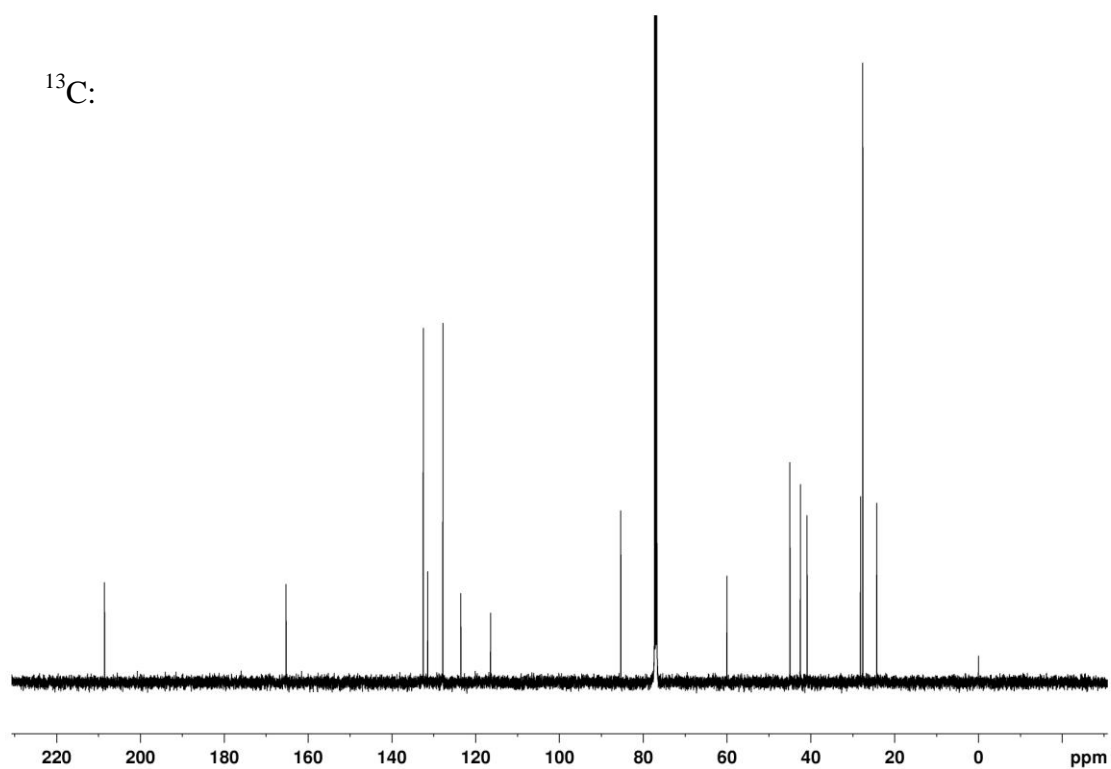

*tert*-Butyl-2-cyano-2-(4-bromophenyl)-2-(3-oxocyclohexyl)-acetate ((*S,R*)-**3ia**)

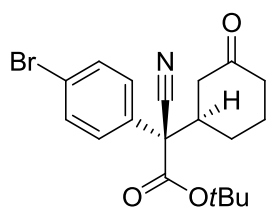

**(*S,R*)-3ia**

<sup>1</sup>H:

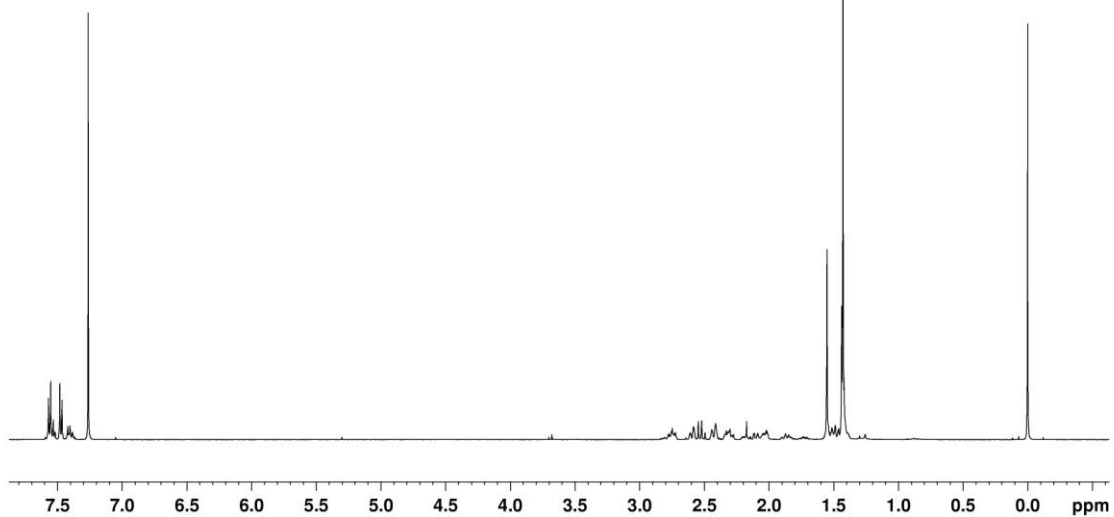

<sup>13</sup>C:

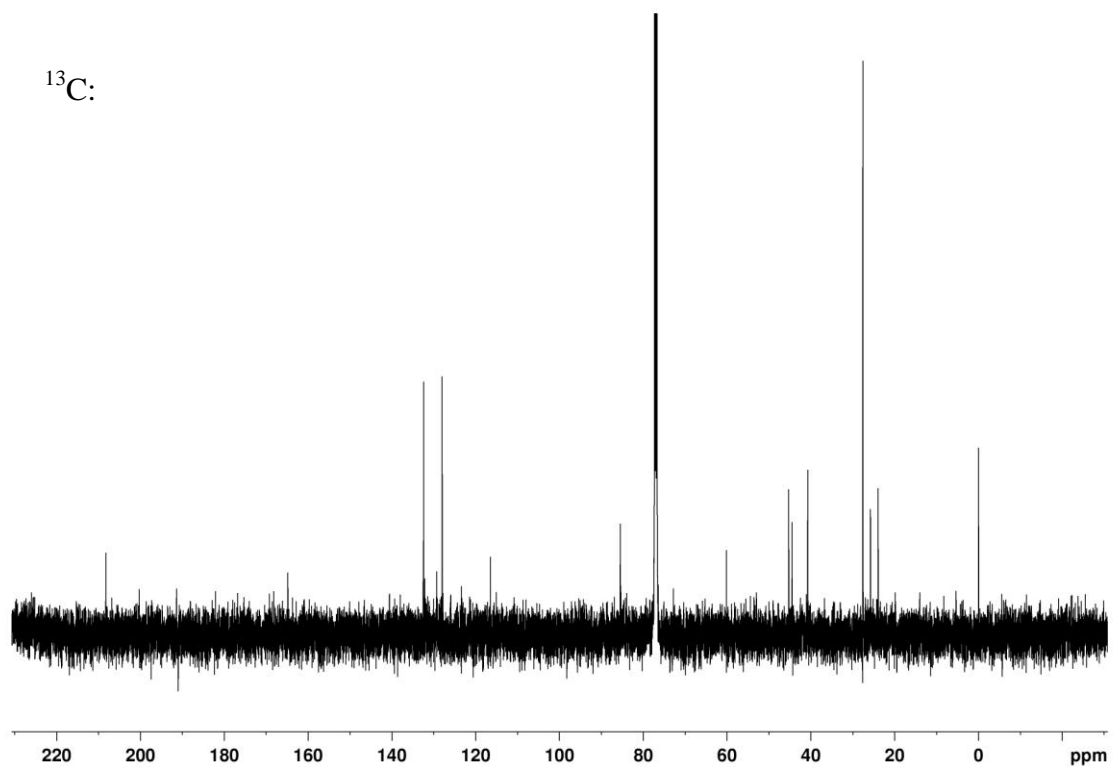



*tert*-Butyl-2-cyano-2-(3-oxocyclohexyl)-2-(*p*-tolyl)-acetate ((*R,R*)-3ja)

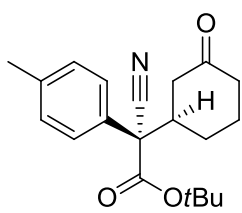

(*R,R*)-3ja

<sup>1</sup>H:

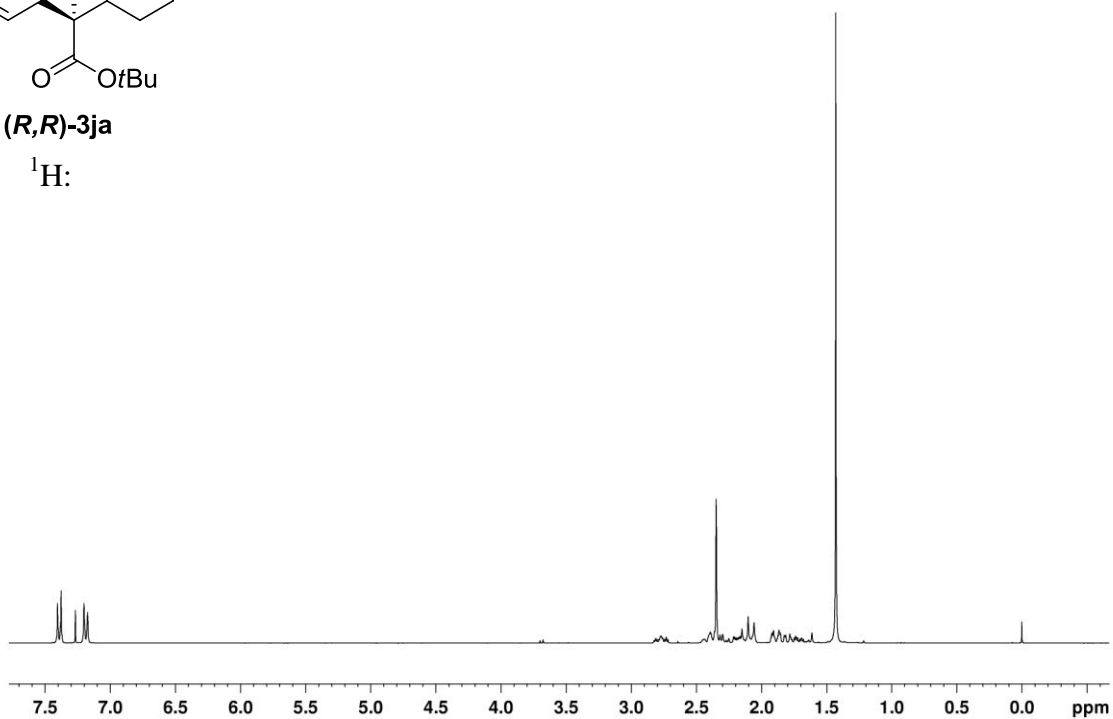

<sup>13</sup>C:

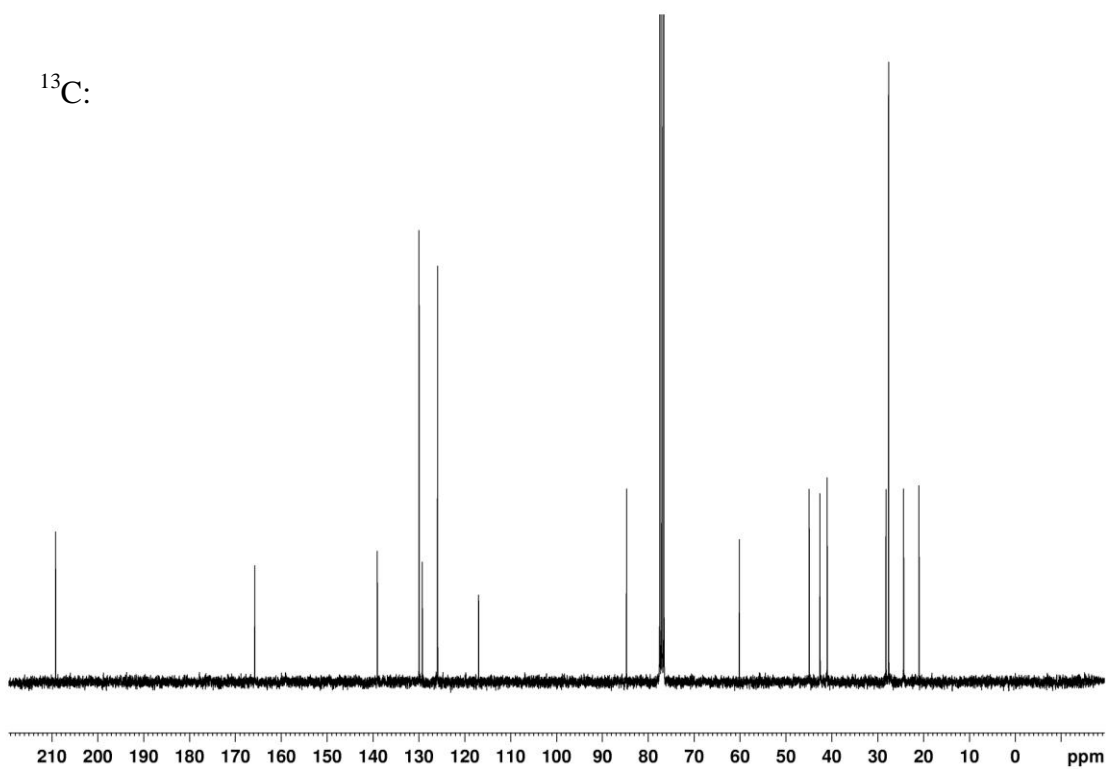

*tert*-Butyl-2-cyano-2-(3-oxocyclohexyl)-2-(*p*-tolyl)-acetate ((*S,R*)-**3ja**)

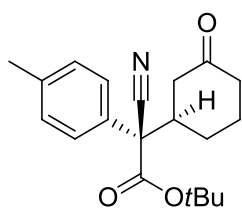

**(*S,R*)-3ja**

<sup>1</sup>H:

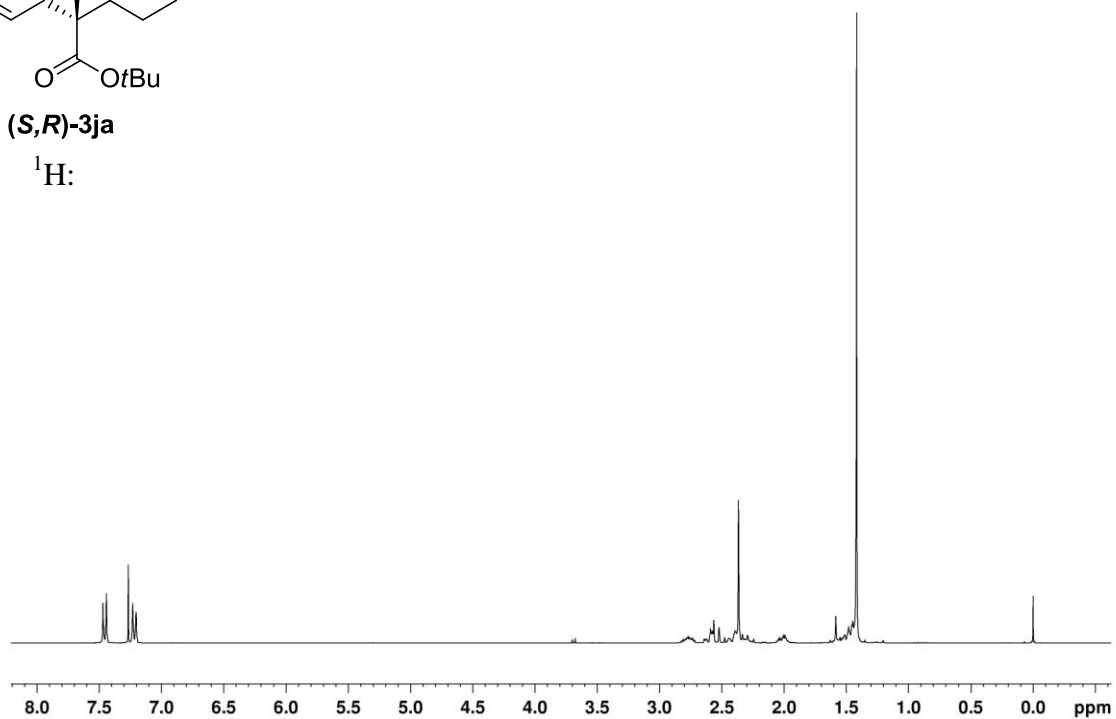

<sup>13</sup>C:

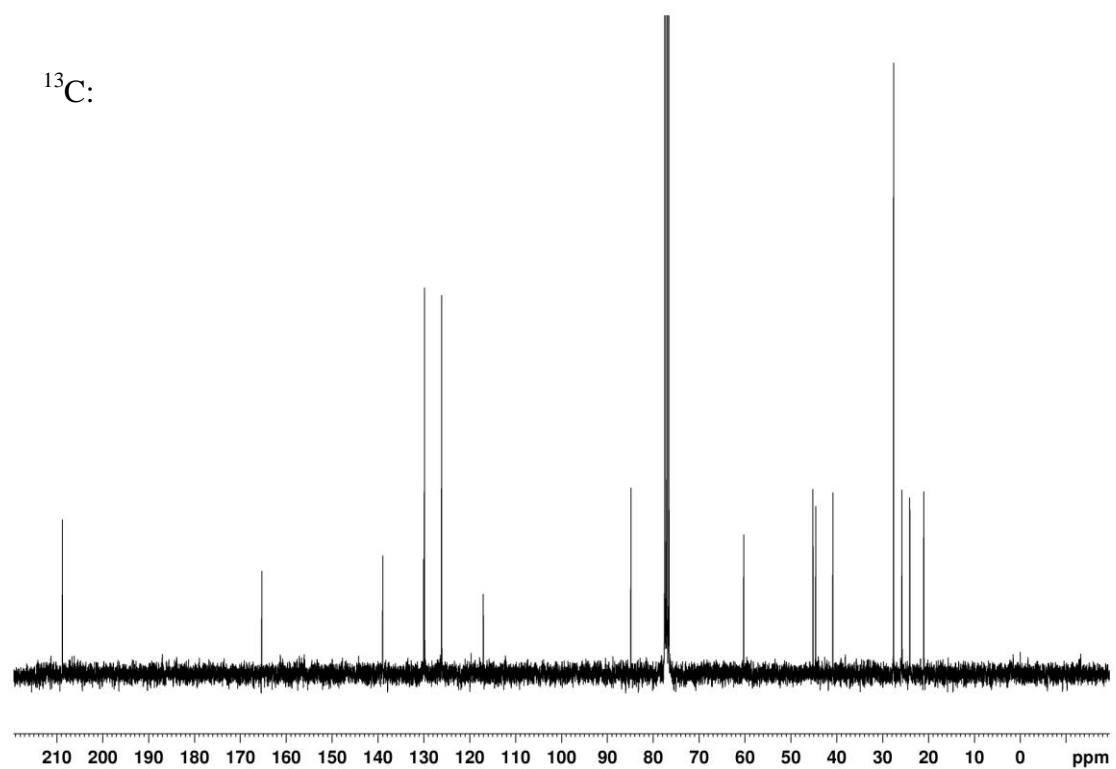

*tert*-Butyl-2-cyano-2-(2-fluorophenyl)-2-(3-oxocyclohexyl)-acetate ((*R,R*)-**3ka**)

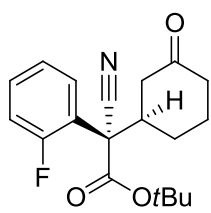

(*R,R*)-**3ka**

<sup>1</sup>H:

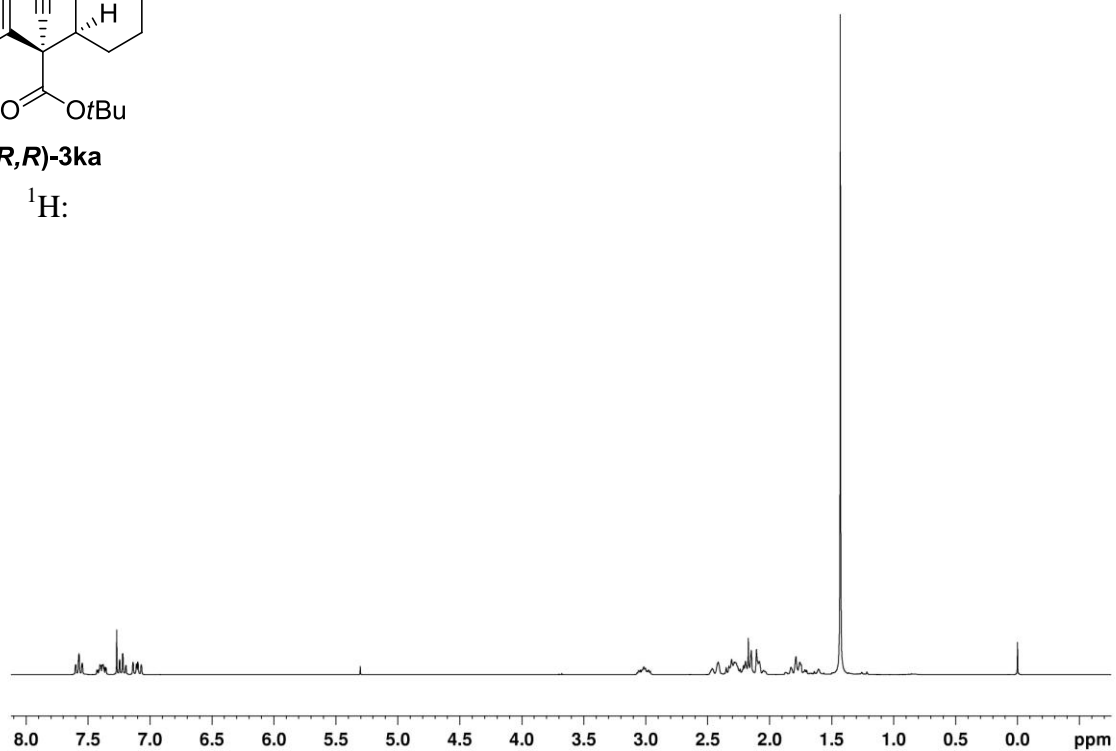

<sup>13</sup>C:

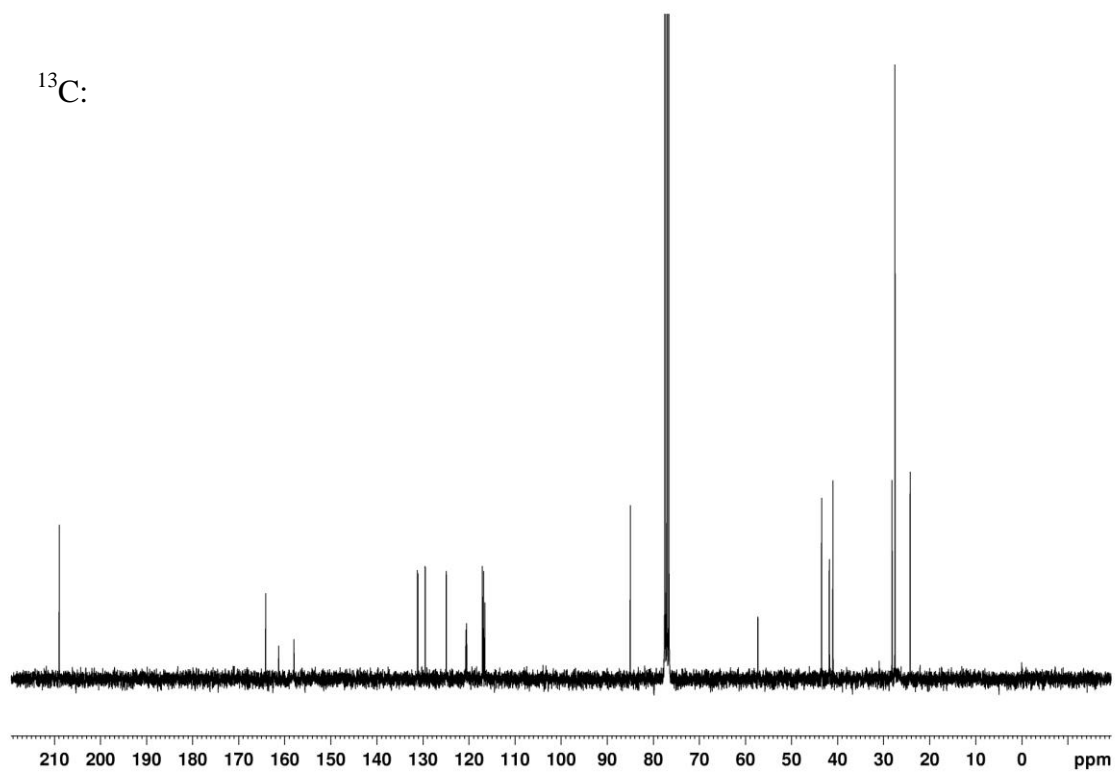

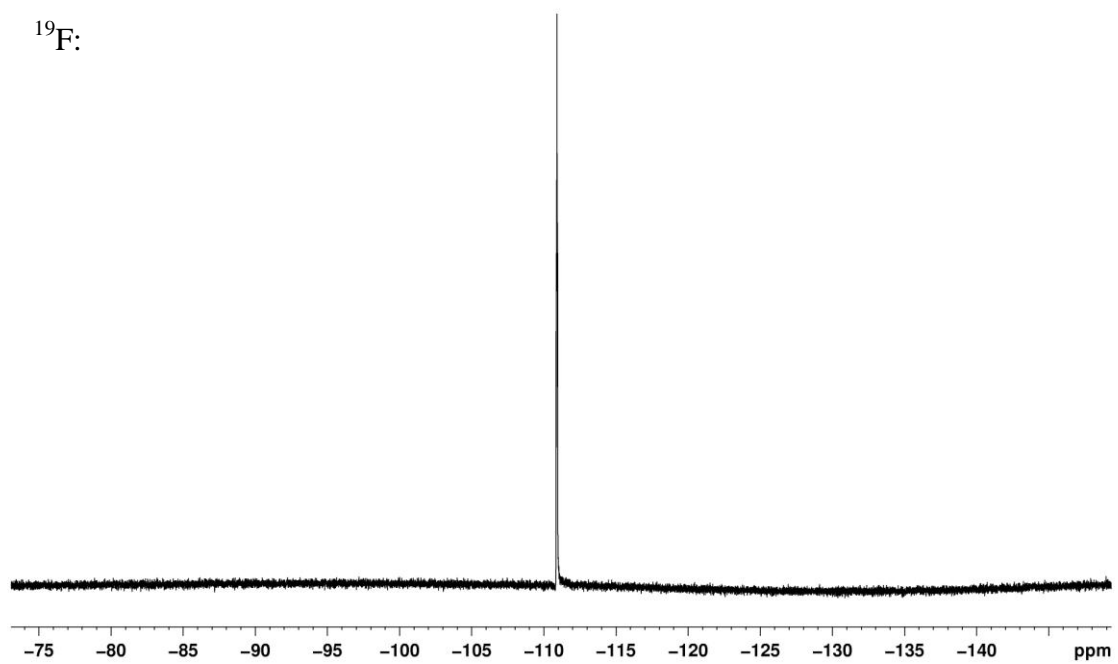

*tert*-Butyl-2-cyano-2-(2-fluorophenyl)-2-(3-oxocyclohexyl)-acetate ((*S,R*)-**3ka**)

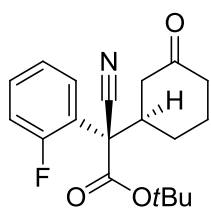

(*S,R*)-**3ka**

<sup>1</sup>H:

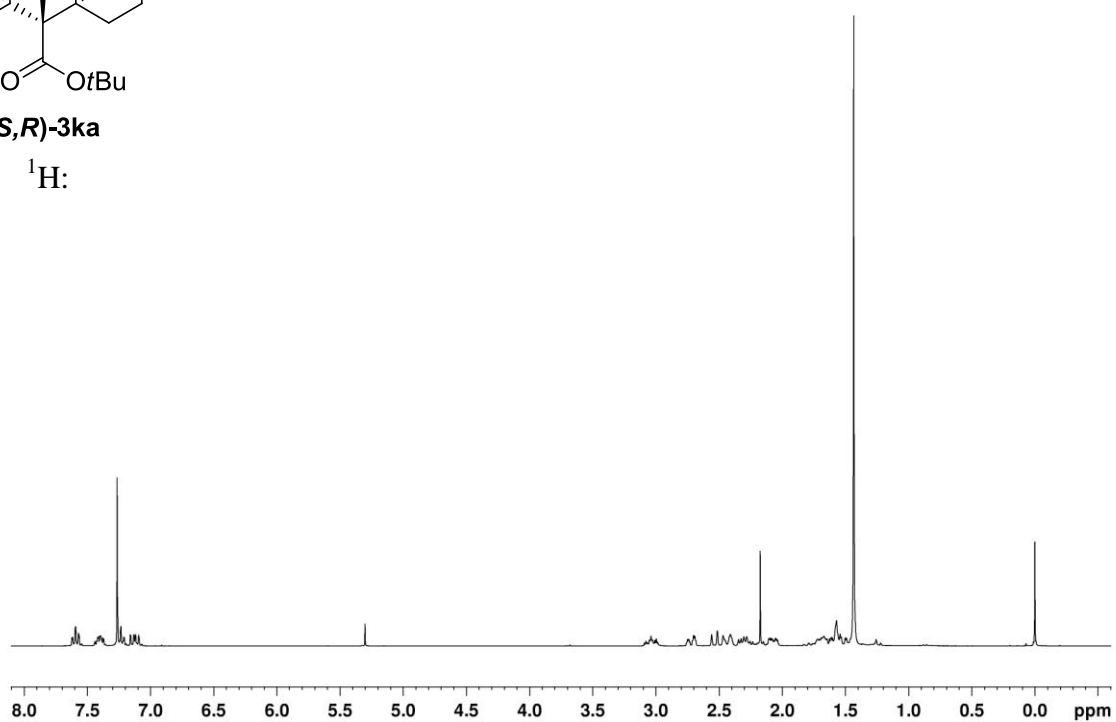

<sup>13</sup>C:

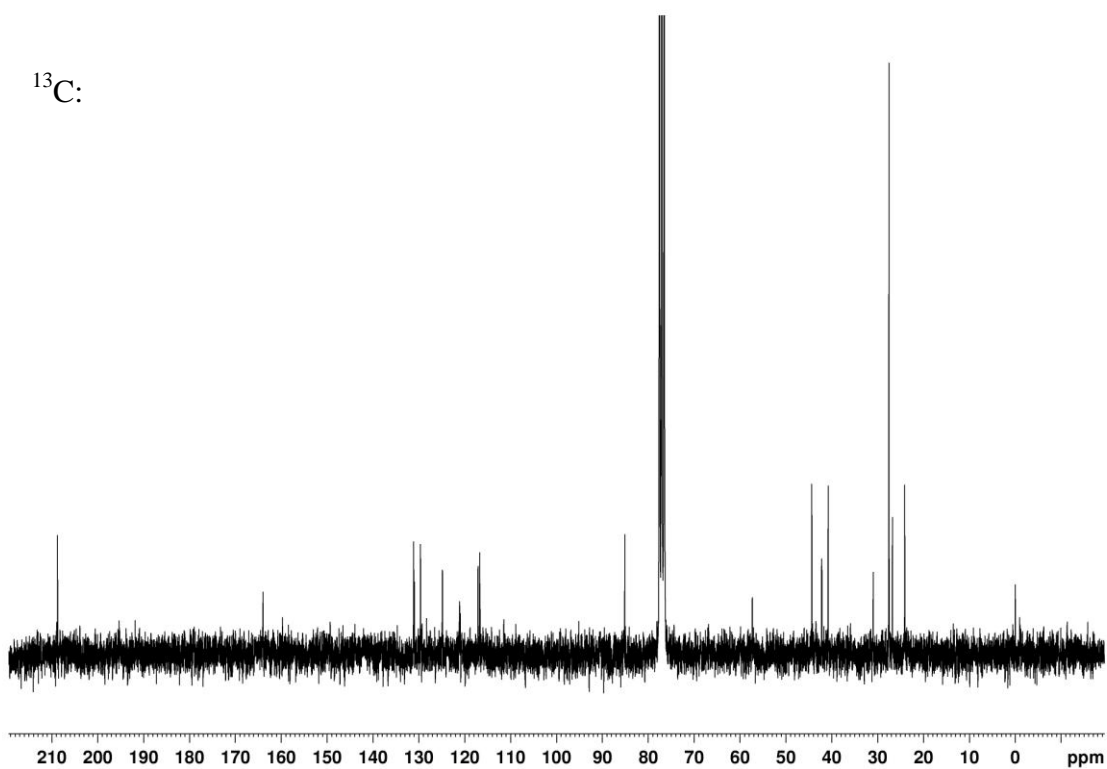

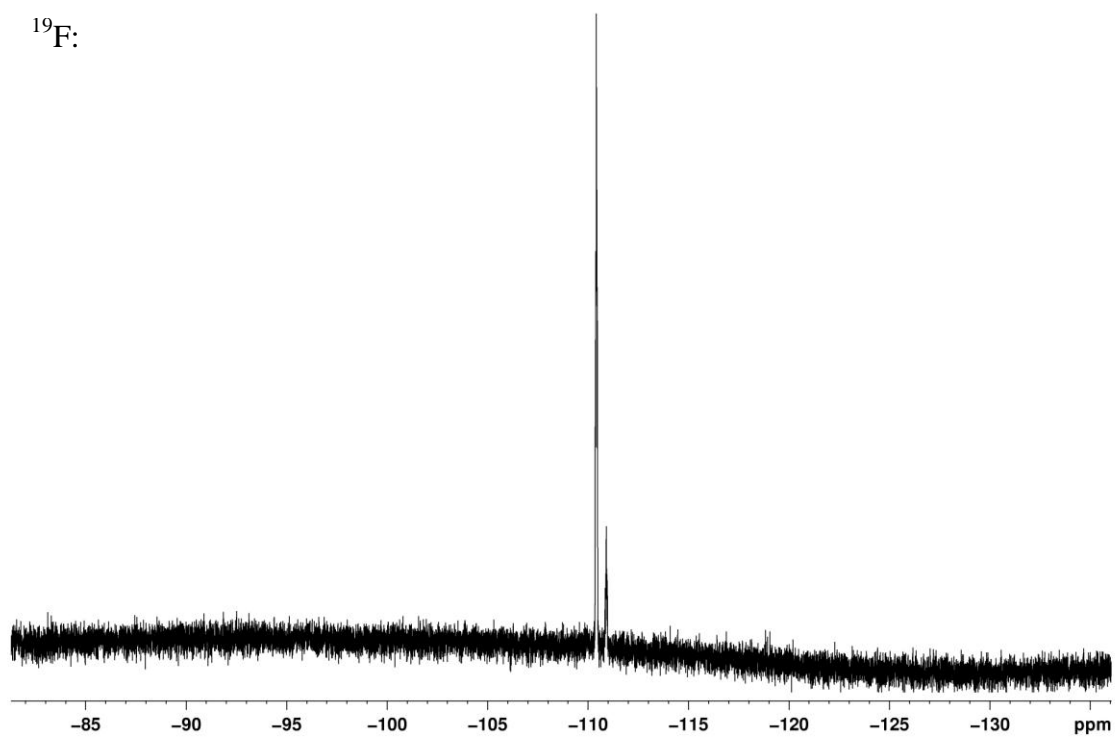

*tert*-Butyl-2-cyano-2-(3-fluorophenyl)-2-(3-oxocyclohexyl)-acetate ((*R,R*)-**3la**)

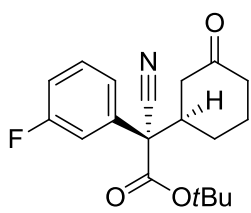

**(*R,R*)-3la**

$^1\text{H}$ :

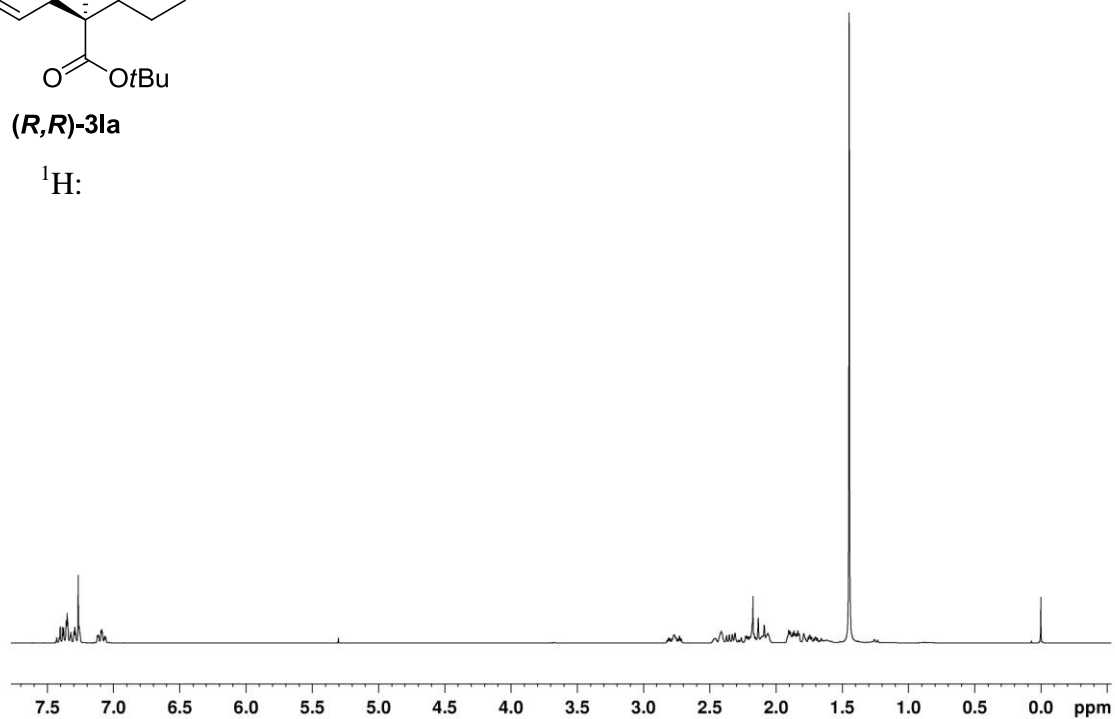

$^{13}\text{C}$ :

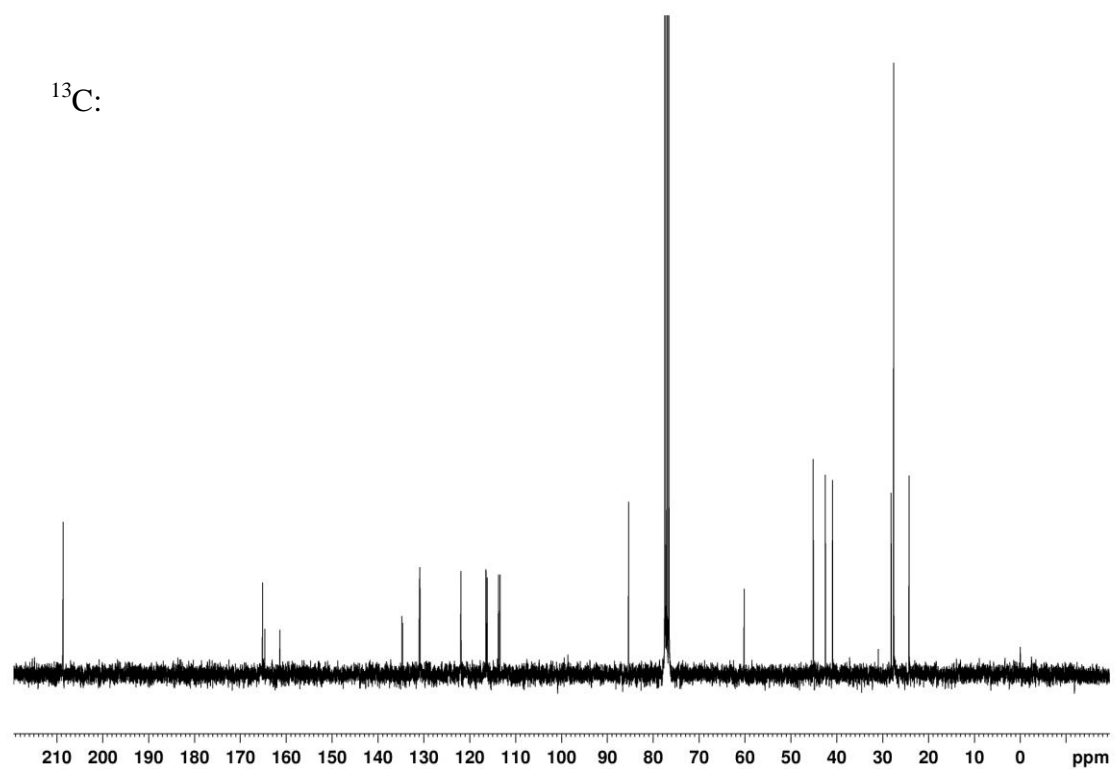

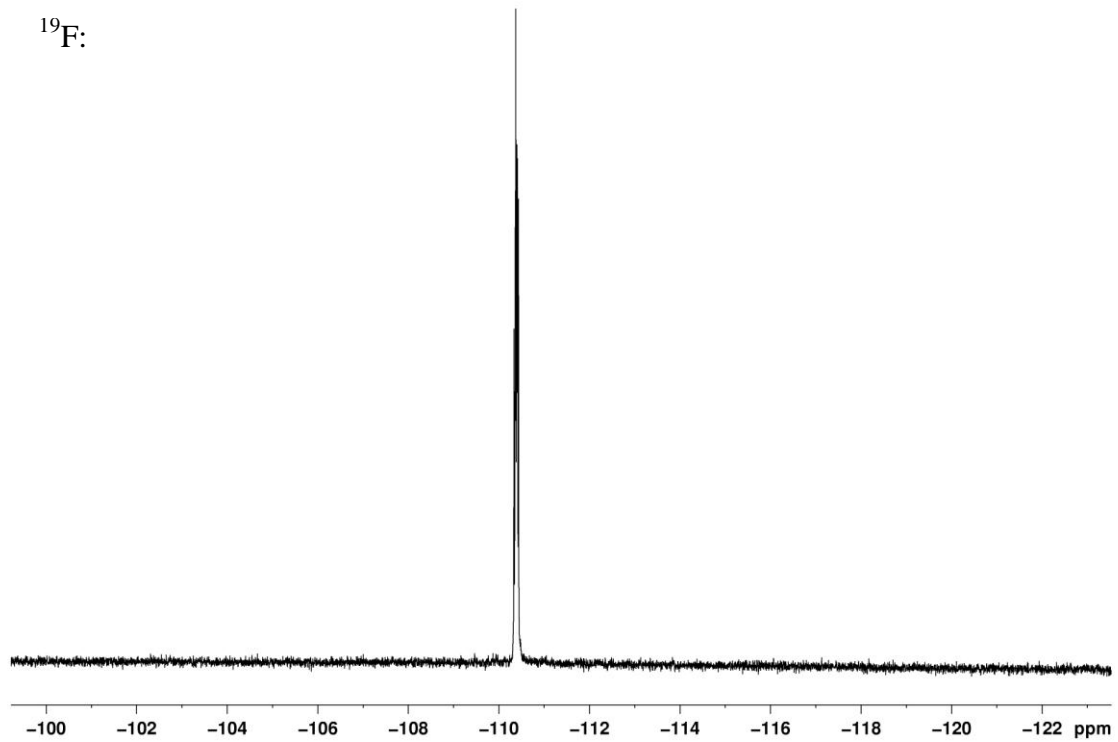



*tert*-Butyl-2-cyano-2-(3-fluorophenyl)-2-(3-oxocyclohexyl)-acetate ((*S,R*)-**3la**)

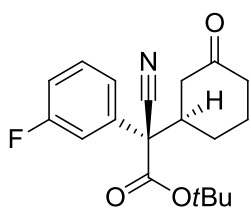

**(*S,R*)-3la**

$^1\text{H}$ :

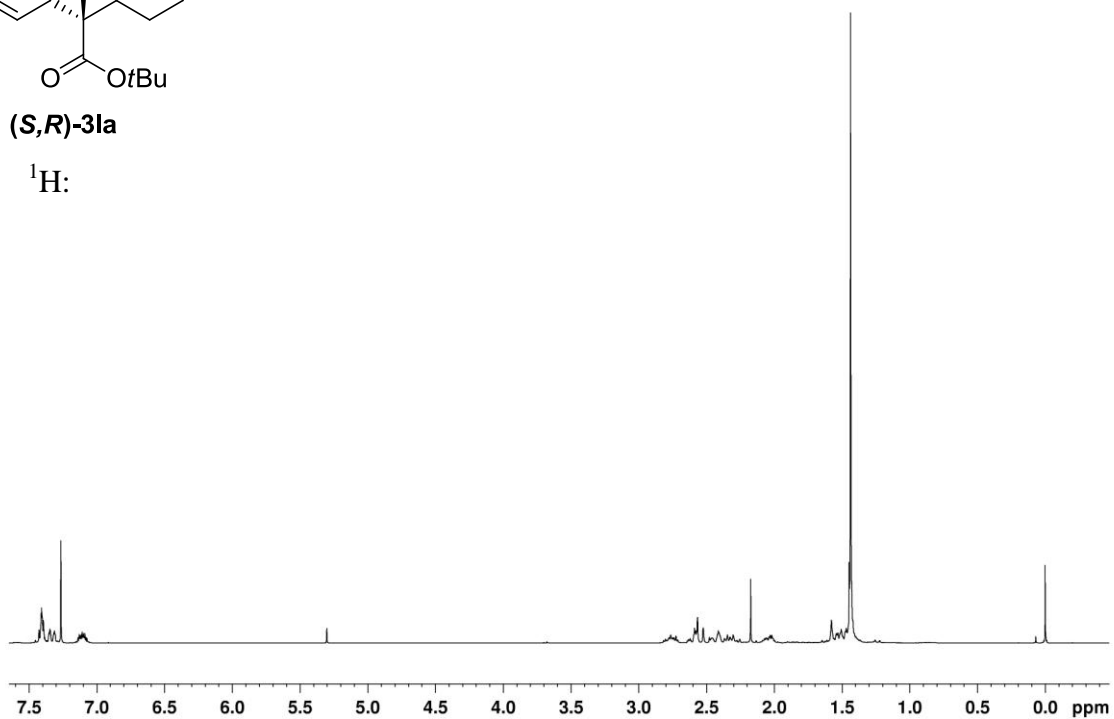

$^{13}\text{C}$ :

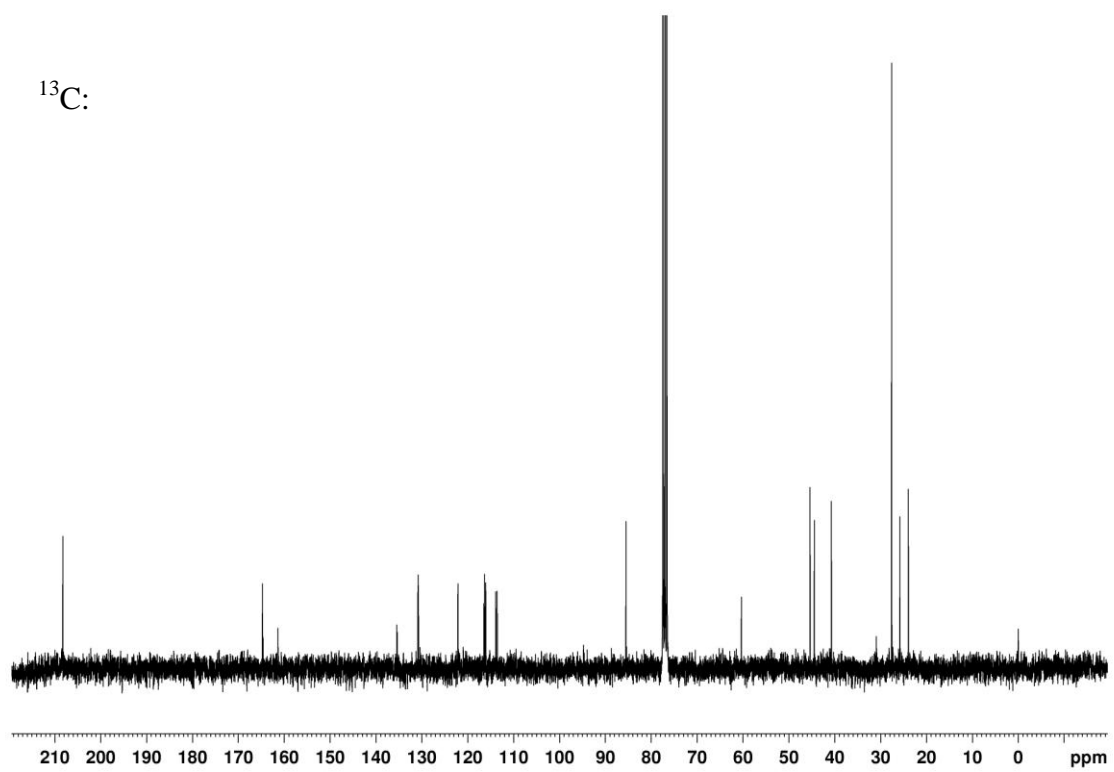

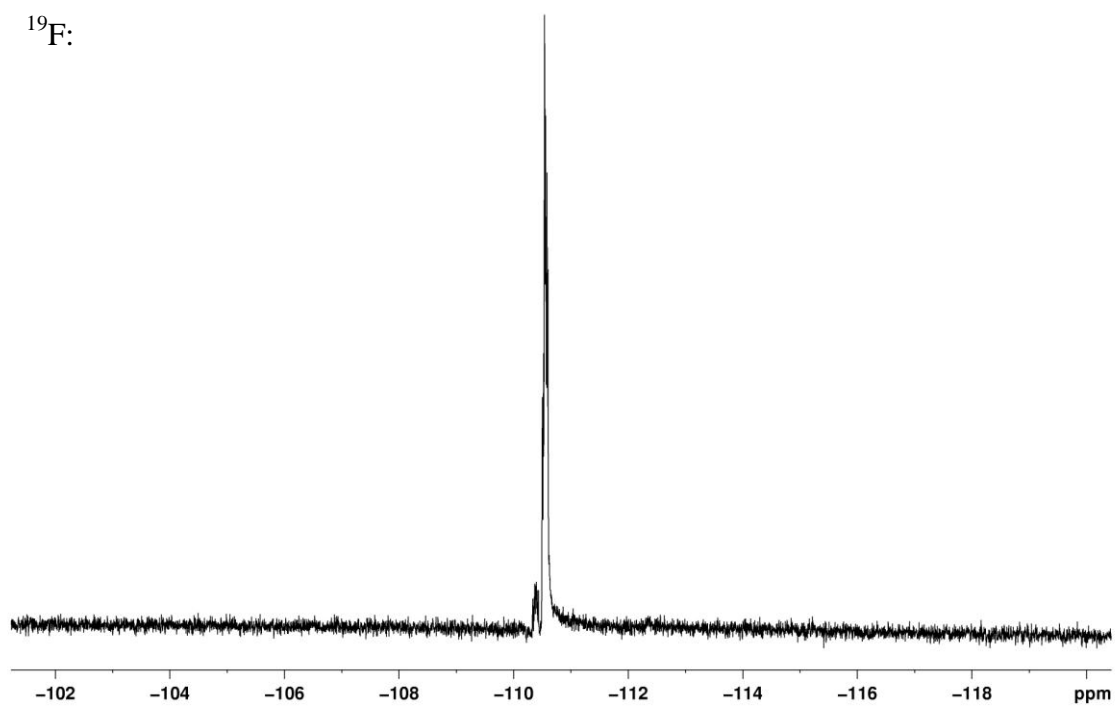

*tert*-Butyl-2-cyano-2-(4-methoxyphenyl)-2-(3-oxocyclohexyl)-acetate (**3ma**)

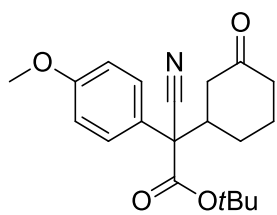

**3ma**

$^1\text{H}$ :

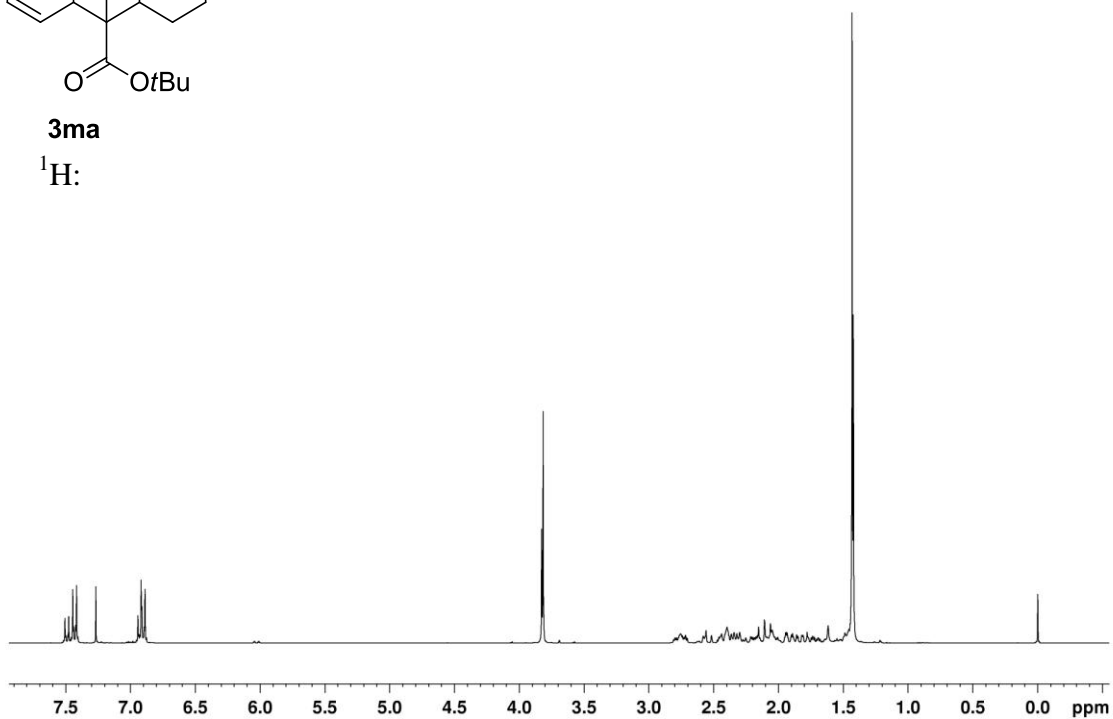

$^{13}\text{C}$ :

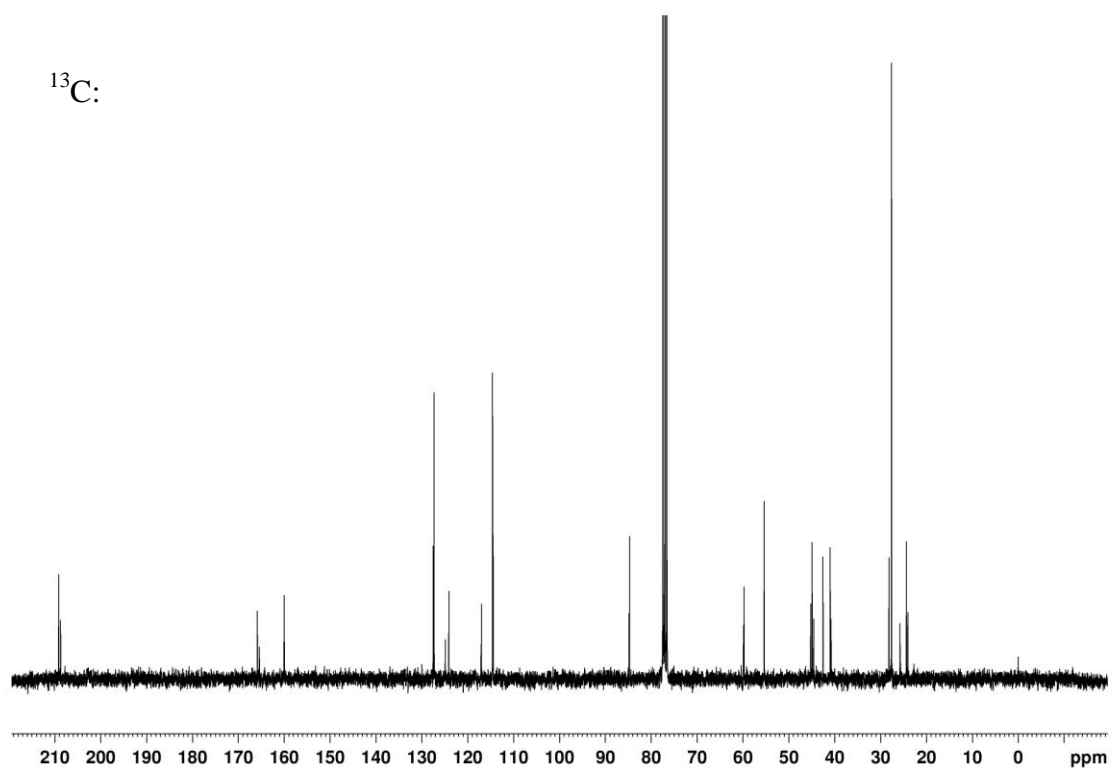

*tert*-Butyl-2-cyano-2-(3-oxocyclopentyl)-2-phenylacetate (**3ab**)

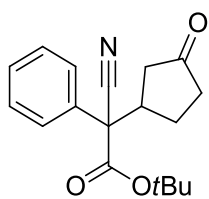

**3ab**

$^1\text{H}$ :

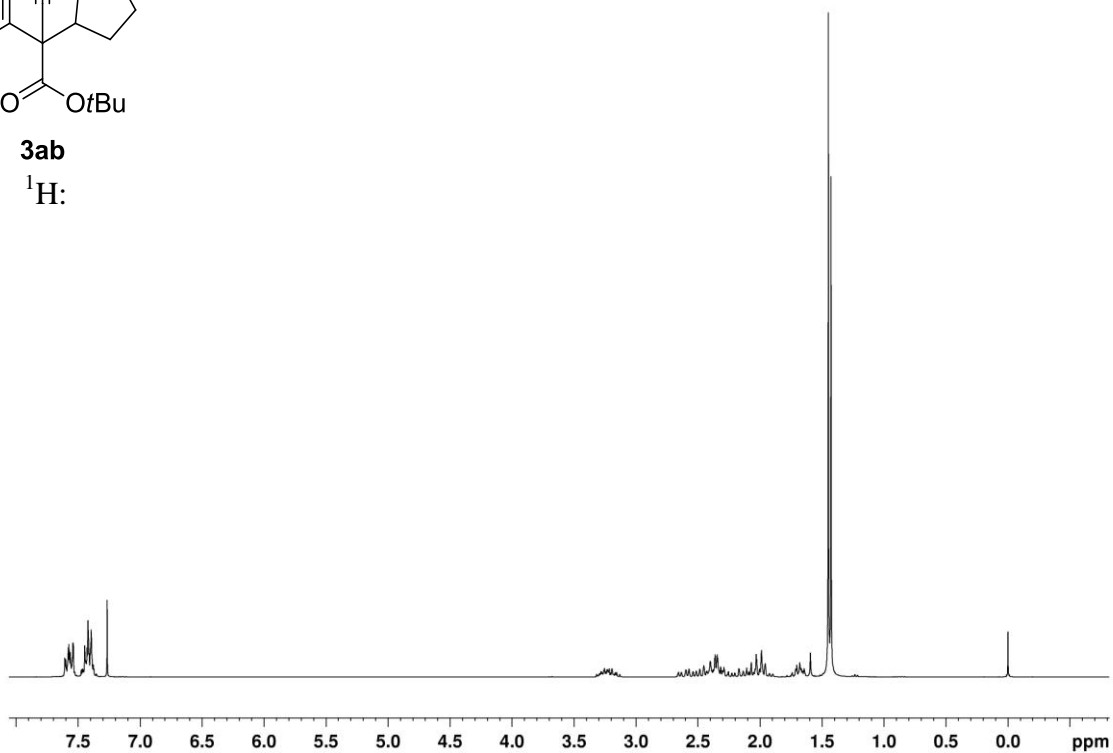

$^{13}\text{C}$ :

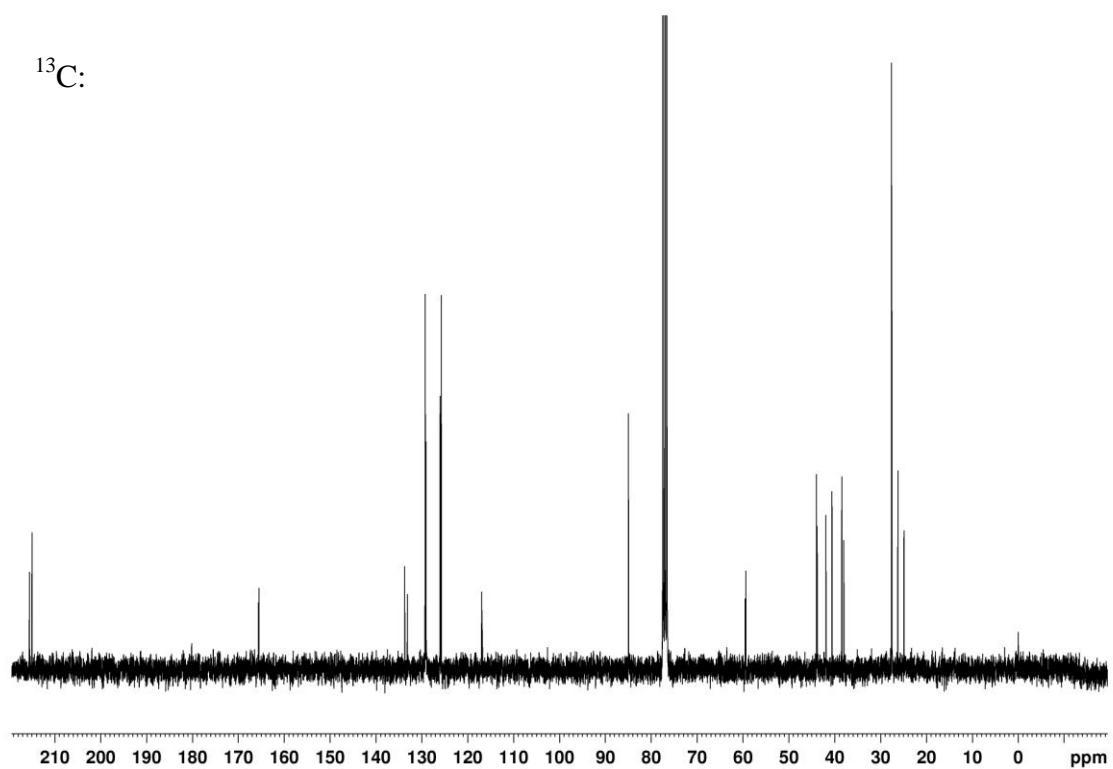

*tert*-Butyl-2-cyano-2-(3-oxocycloheptyl)-2-phenylacetate ((*R,R*)-**3ac**)

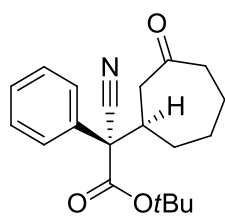

**(*R,R*)-3ac**

<sup>1</sup>H:

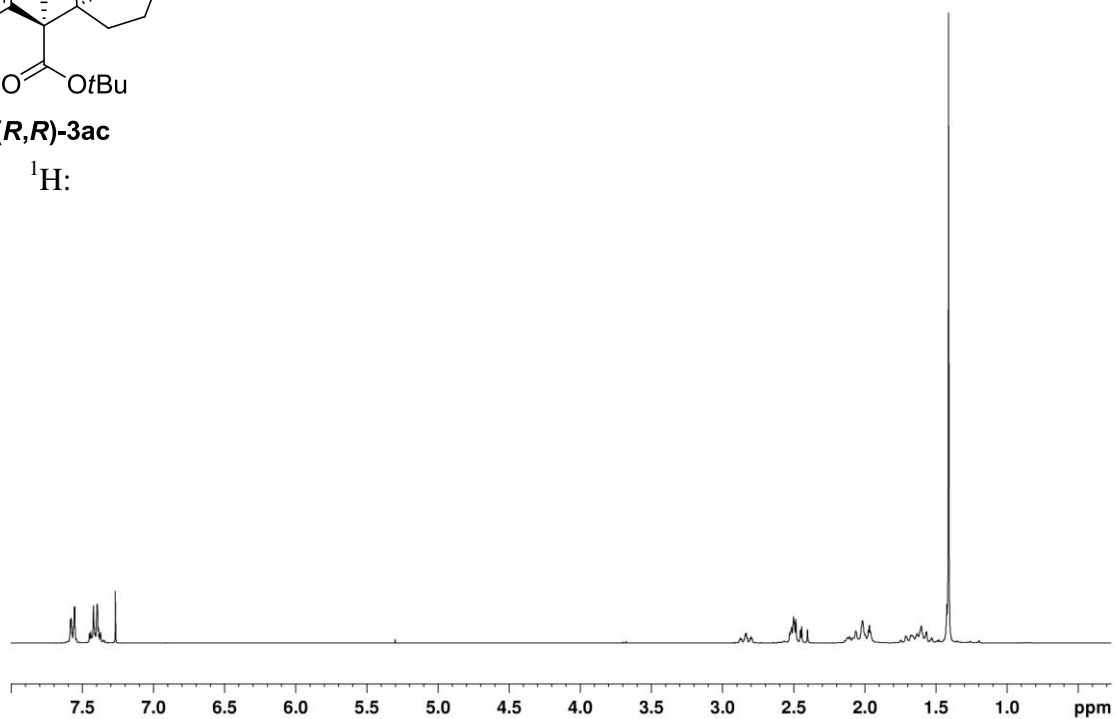

<sup>13</sup>C:

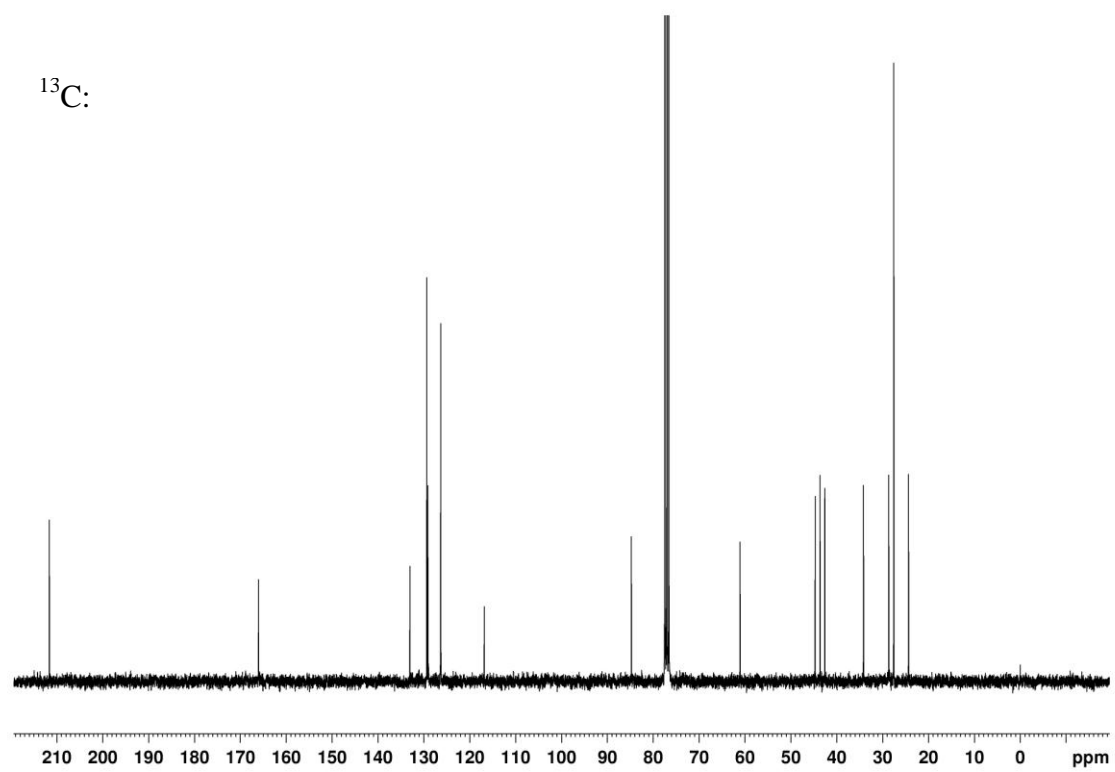

*tert*-Butyl-2-cyano-2-(3-oxocycloheptyl)-2-phenylacetate (**3ac**)

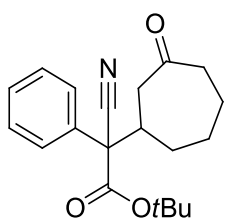

**3ac**

<sup>1</sup>H:

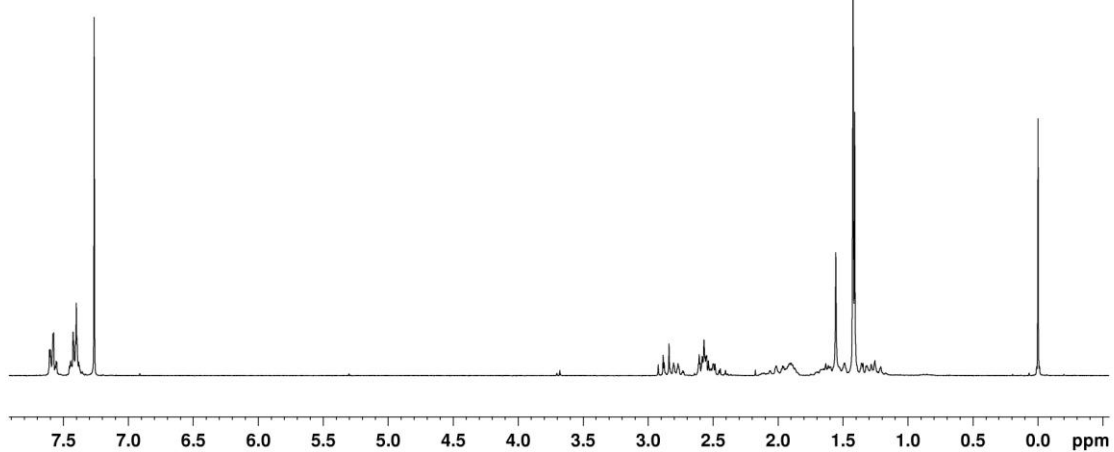

<sup>13</sup>C:

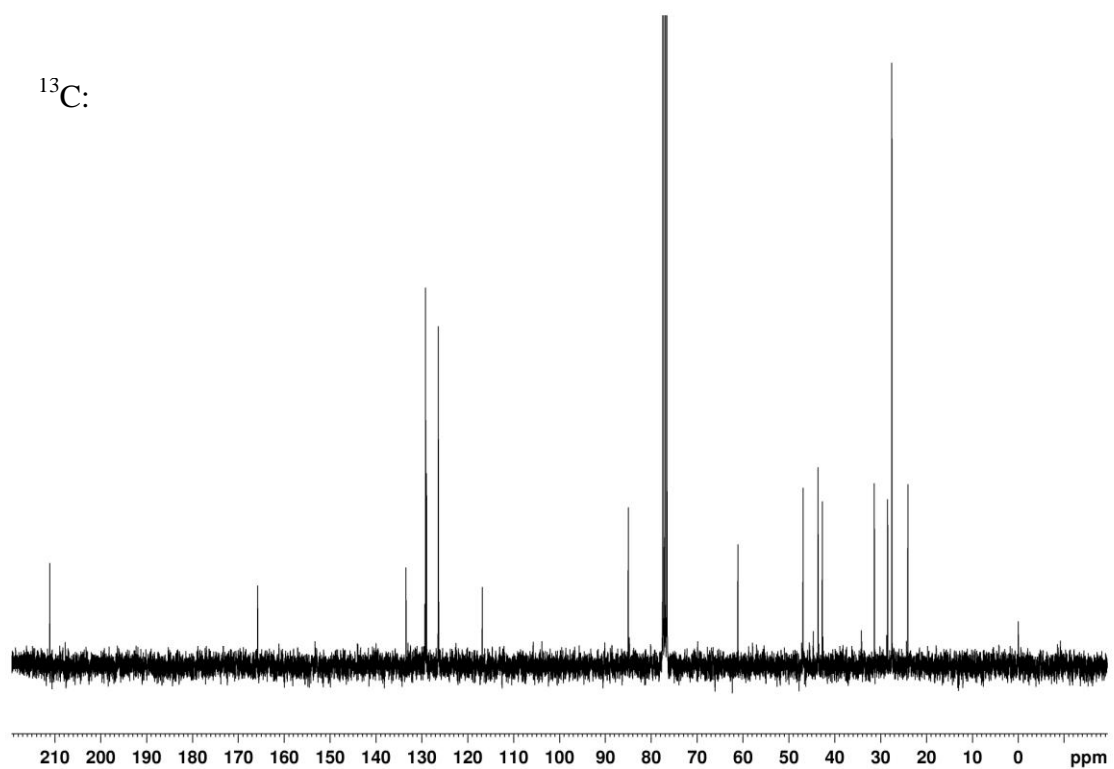

*tert*-Butyl-2-cyano-2-(3,3-dimethyl-5-oxocyclohexyl)-2-phenylacetate ((*R,R*)-**3ad**)

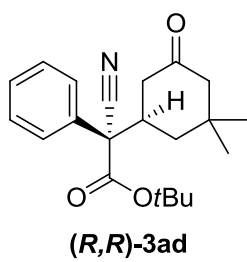

<sup>1</sup>H:

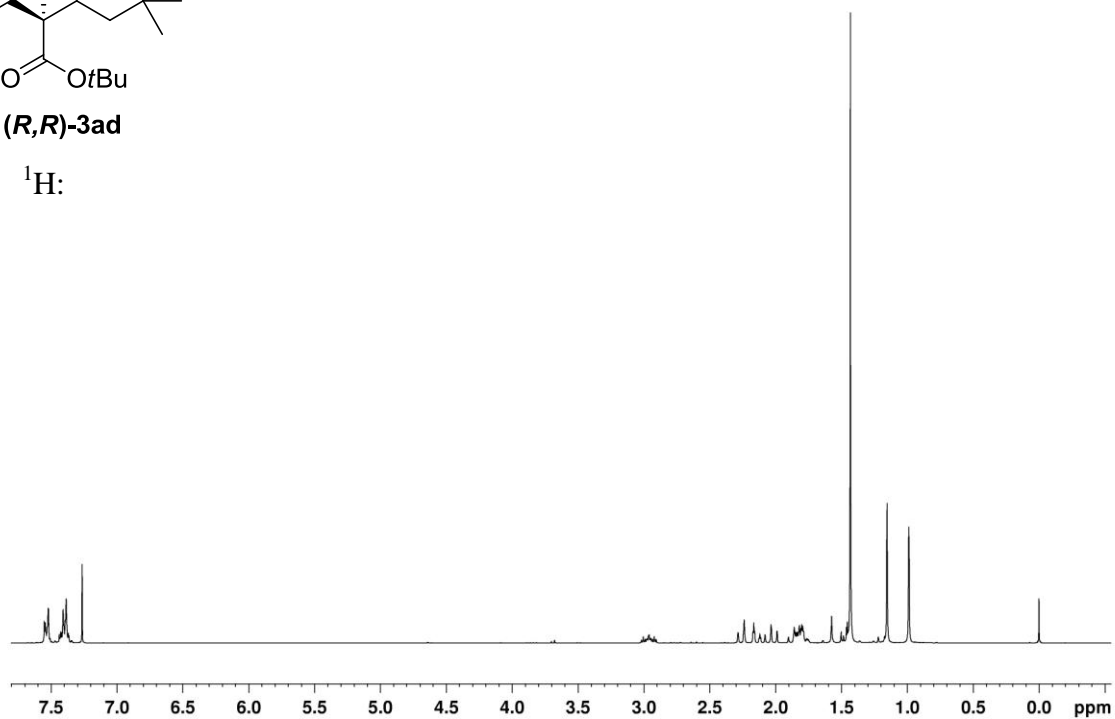

<sup>13</sup>C:

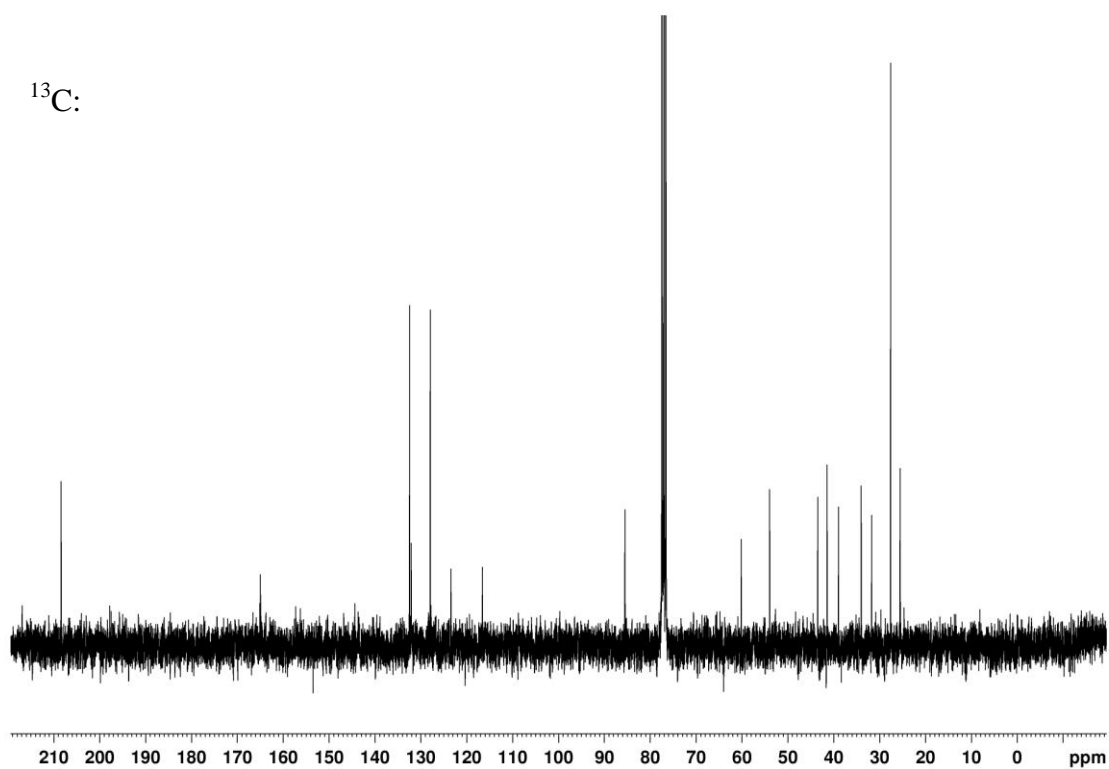

*tert*-Butyl-2-cyano-2-(3,3-dimethyl-5-oxocyclohexyl)-2-phenylacetate (**3ad**)

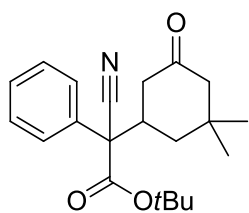

**3ad**

$^1\text{H}$ :

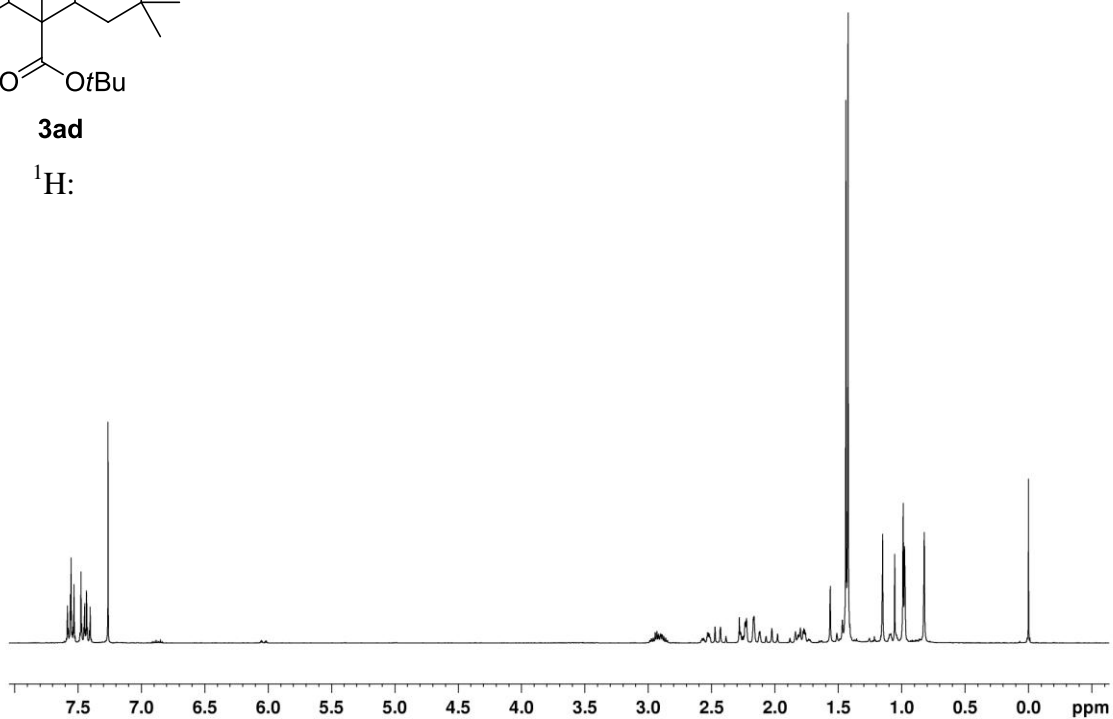

$^{13}\text{C}$ :

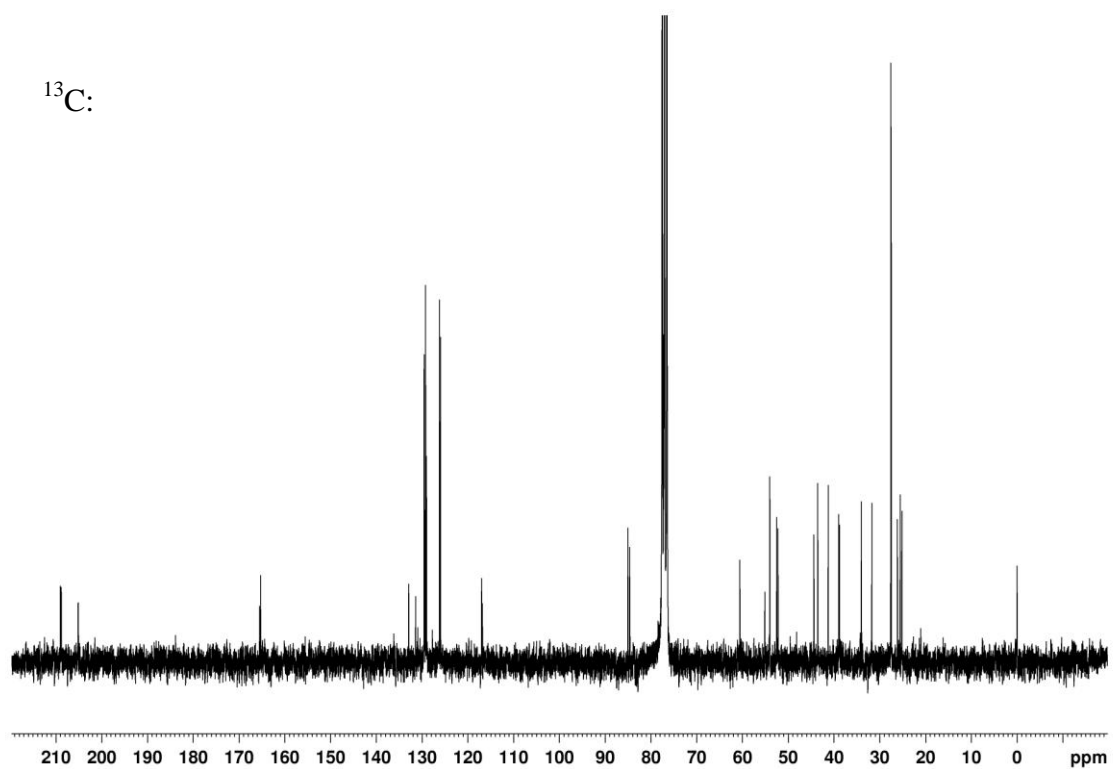



*tert*-Butyl-2-cyano-2-(4-chlorophenyl)-2-(3,3-dimethyl-5-oxocyclohexyl)acetate ((*R,R*)-**3hd**)

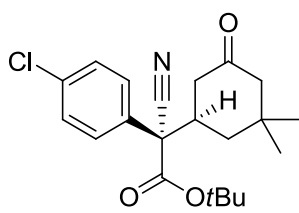

(*R,R*)-**3hd**

<sup>1</sup>H:

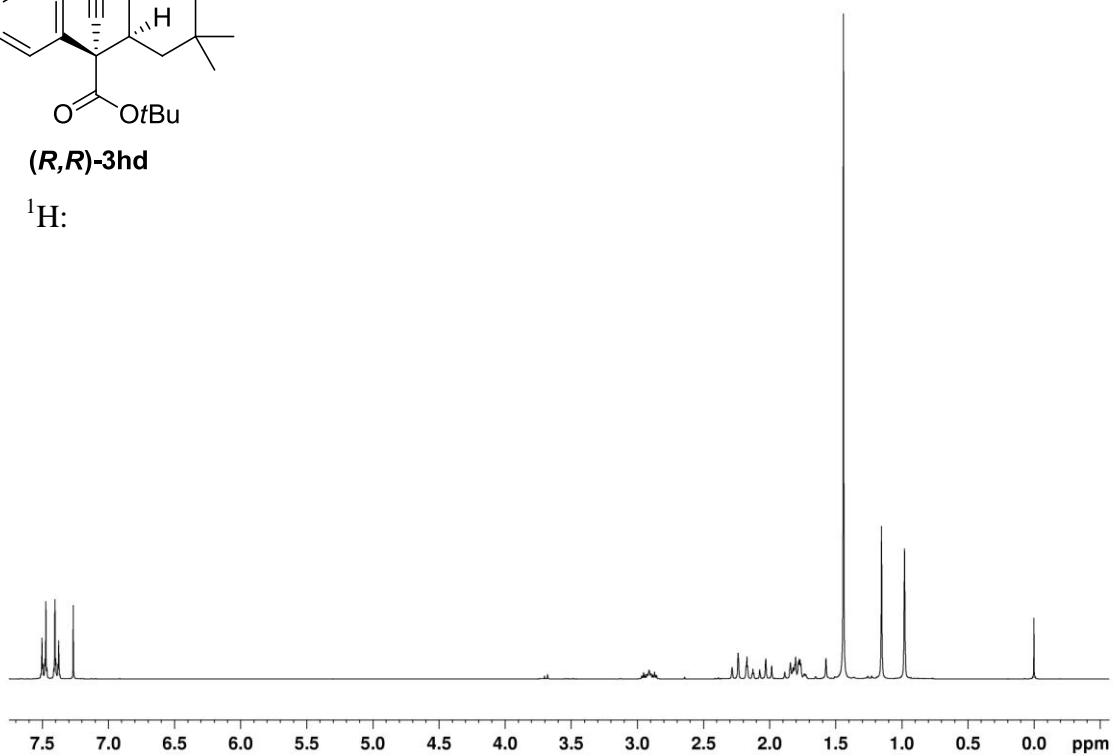

<sup>13</sup>C:

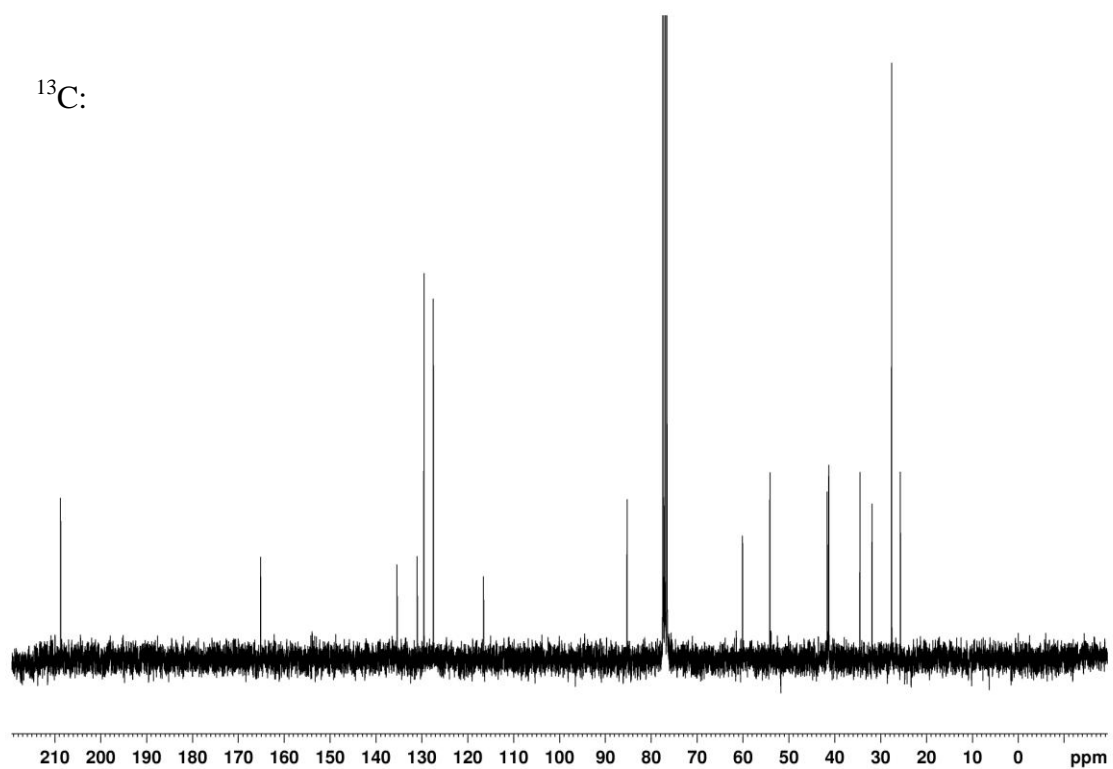

*tert*-Butyl-2-cyano-2-(4-chlorophenyl)-2-(3,3-dimethyl-5-oxocyclohexyl)acetate ((*S,R*)-**3hd**)

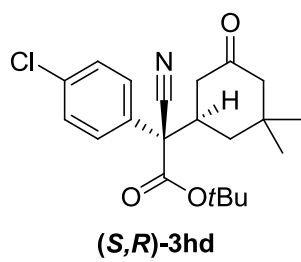

<sup>1</sup>H:

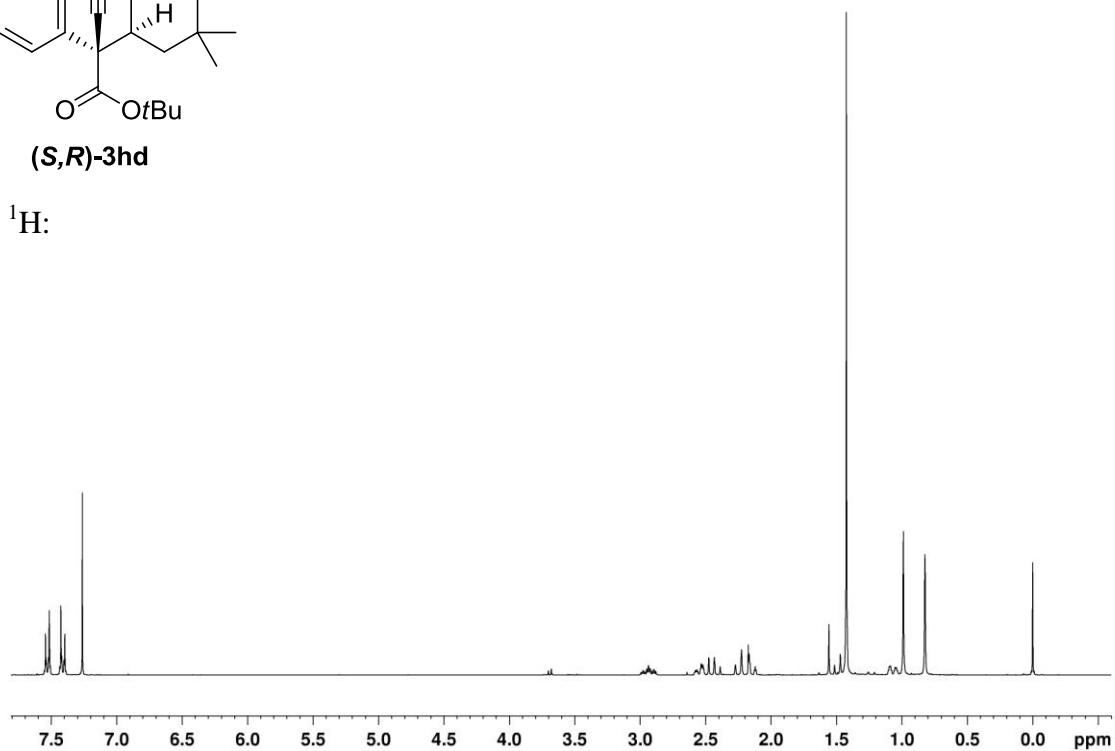

<sup>13</sup>C:

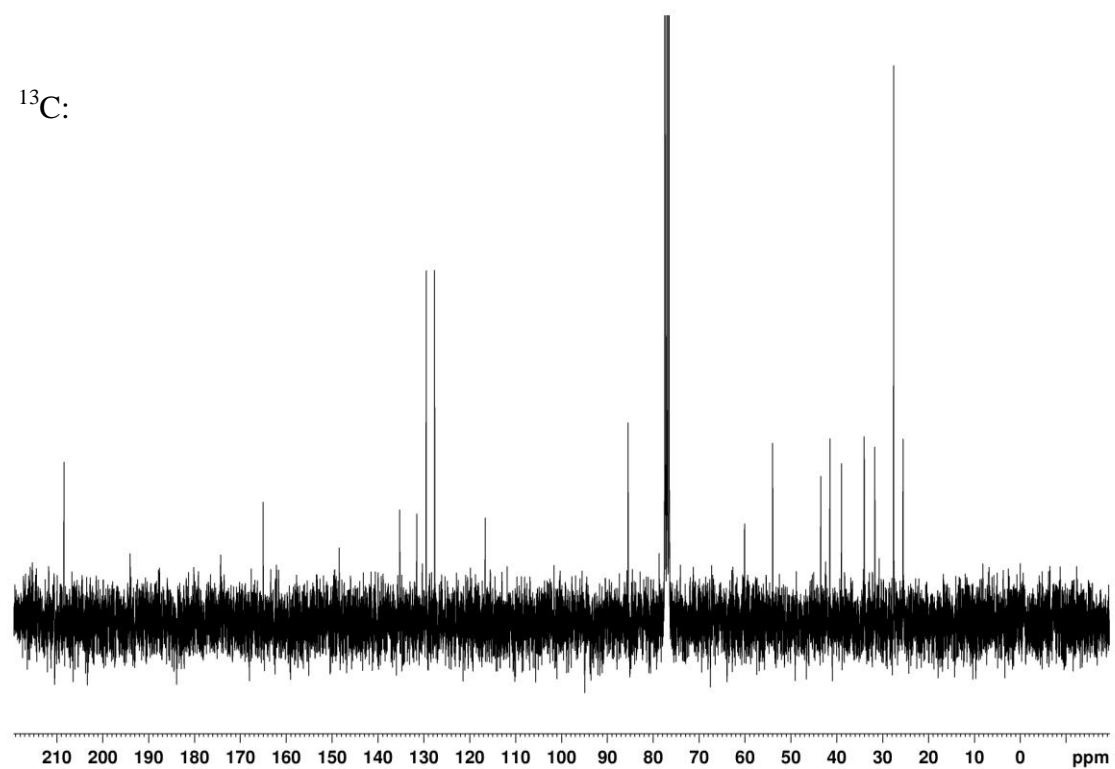

*tert*-Butyl-2-cyano-2-(4-bromophenyl)-2-(3,3-dimethyl-5-oxocyclohexyl)acetate ((*R,R*)-**3id**)

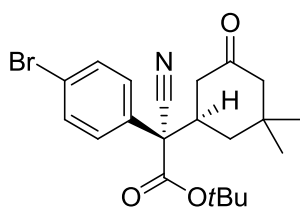

(*R,R*)-**3id**

<sup>1</sup>H:

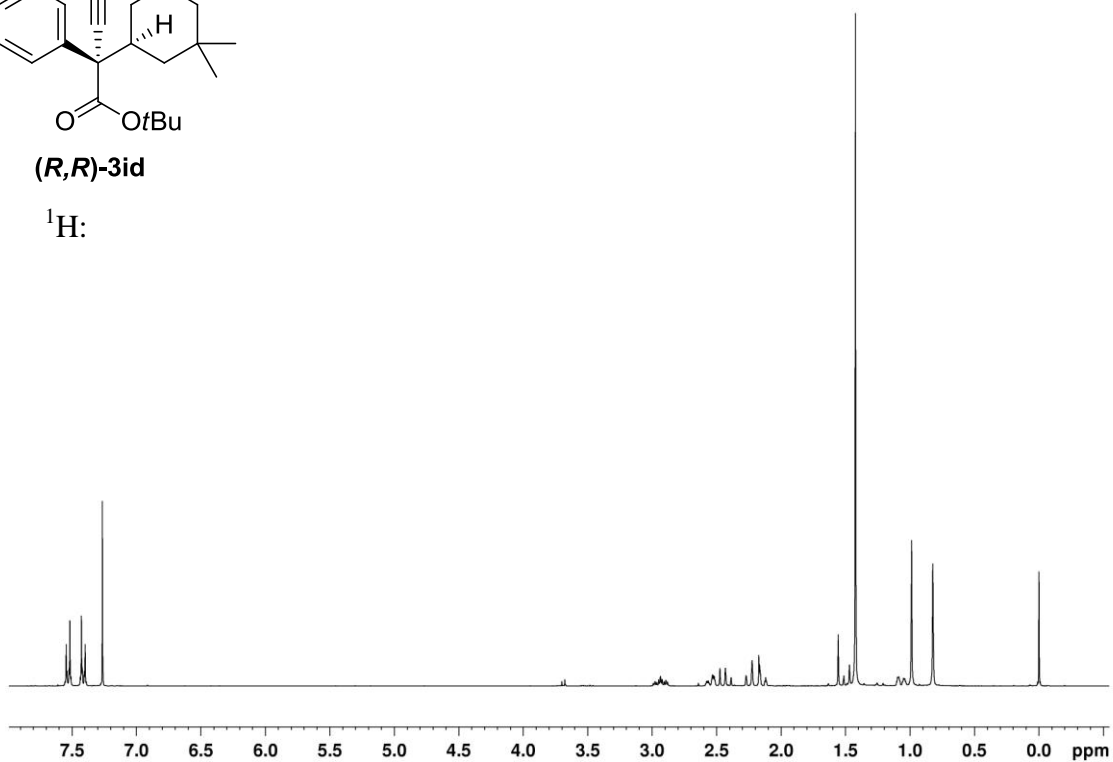

<sup>13</sup>C:

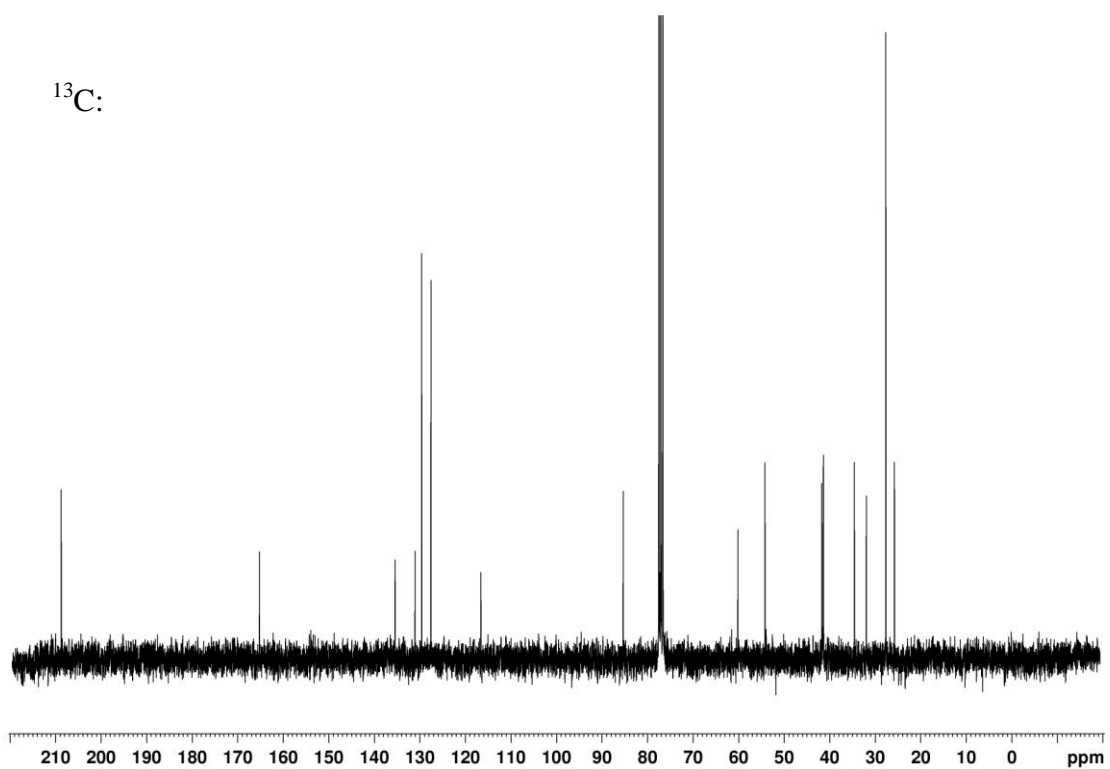

*tert*-Butyl-2-cyano-2-(4-bromophenyl)-2-(3,3-dimethyl-5-oxocyclohexyl)acetate ((*S,R*)-**3id**)

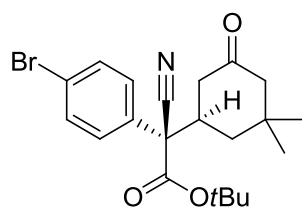

**(*S,R*)-3id**

<sup>1</sup>H:

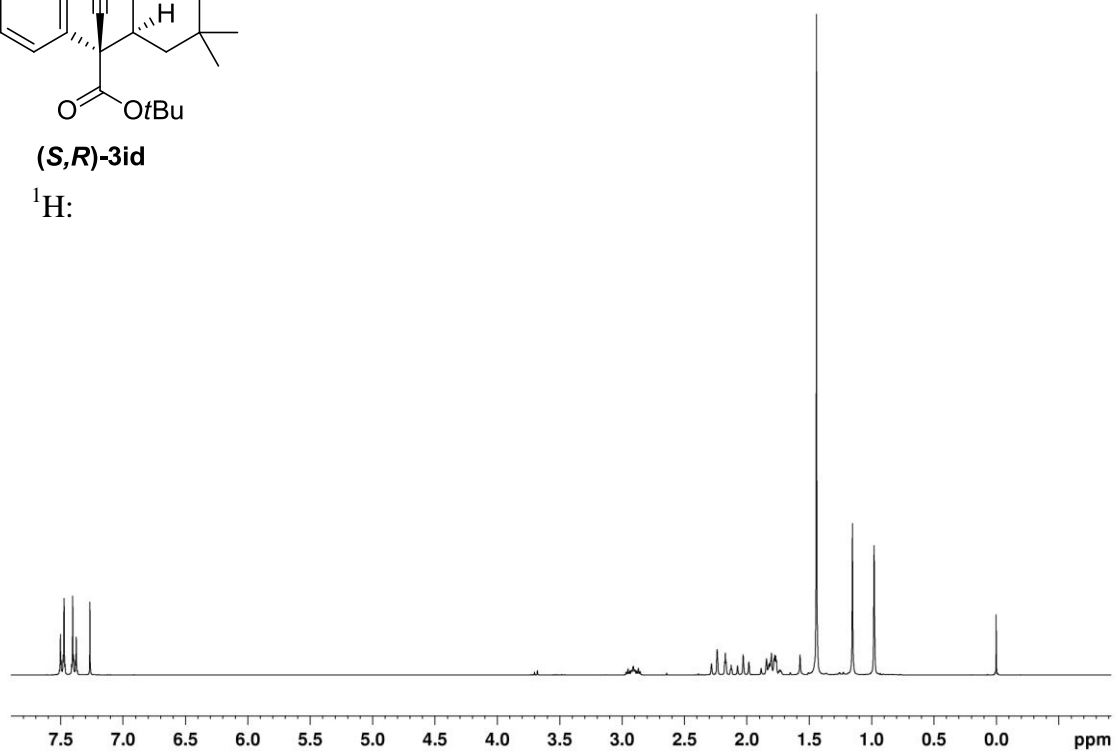

<sup>13</sup>C:

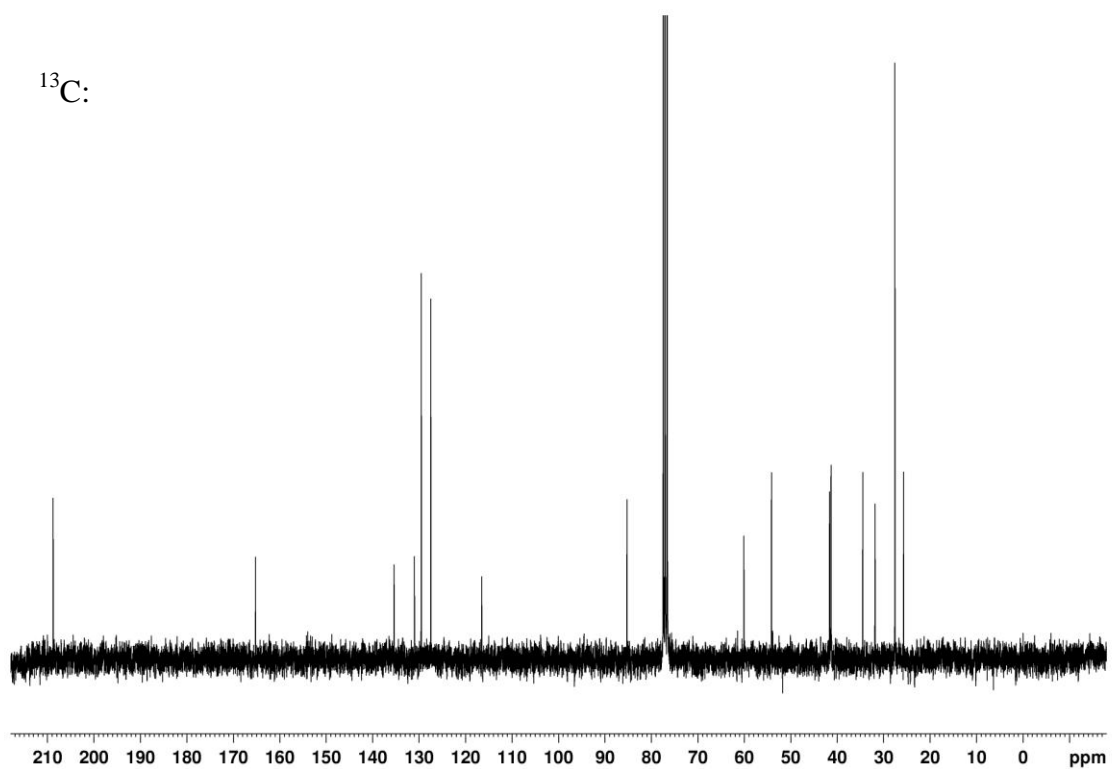

*tert*-Butyl-2-cyano-2-(3-oxo-2,3-dihydro-1H-inden-1-yl)-2-phenylacetate (**3ae**)

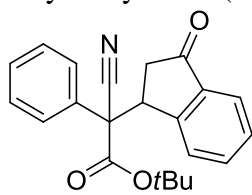

**3ae** (diastereomer a + some b)

$^1\text{H}$ :

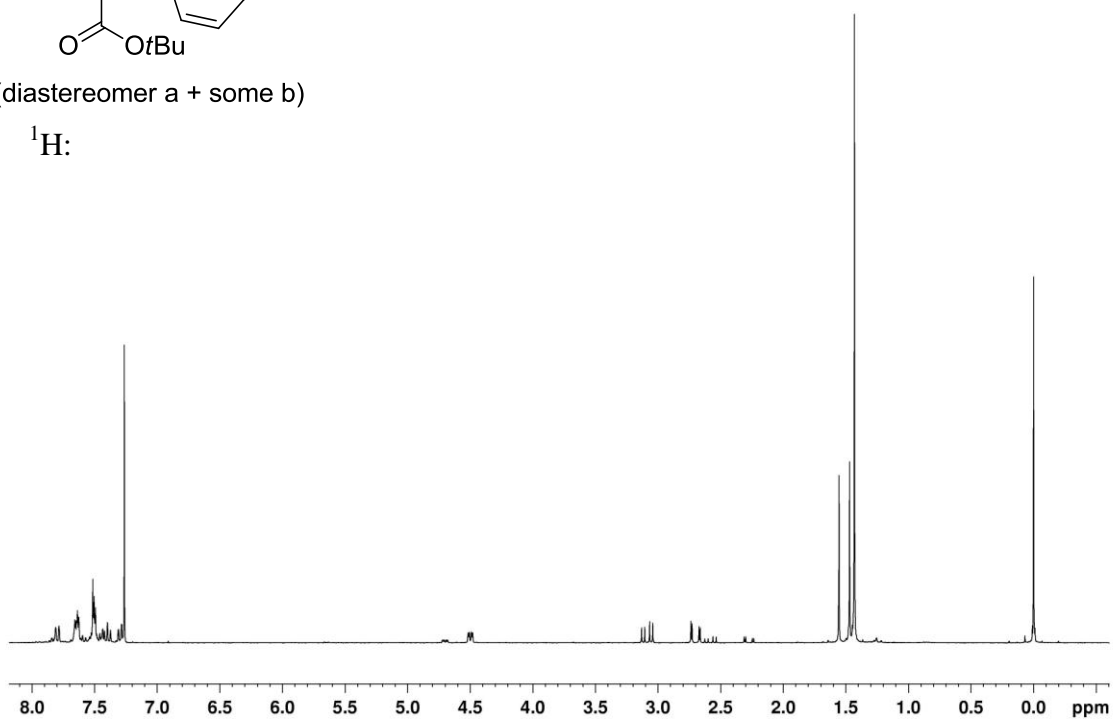

$^{13}\text{C}$ :

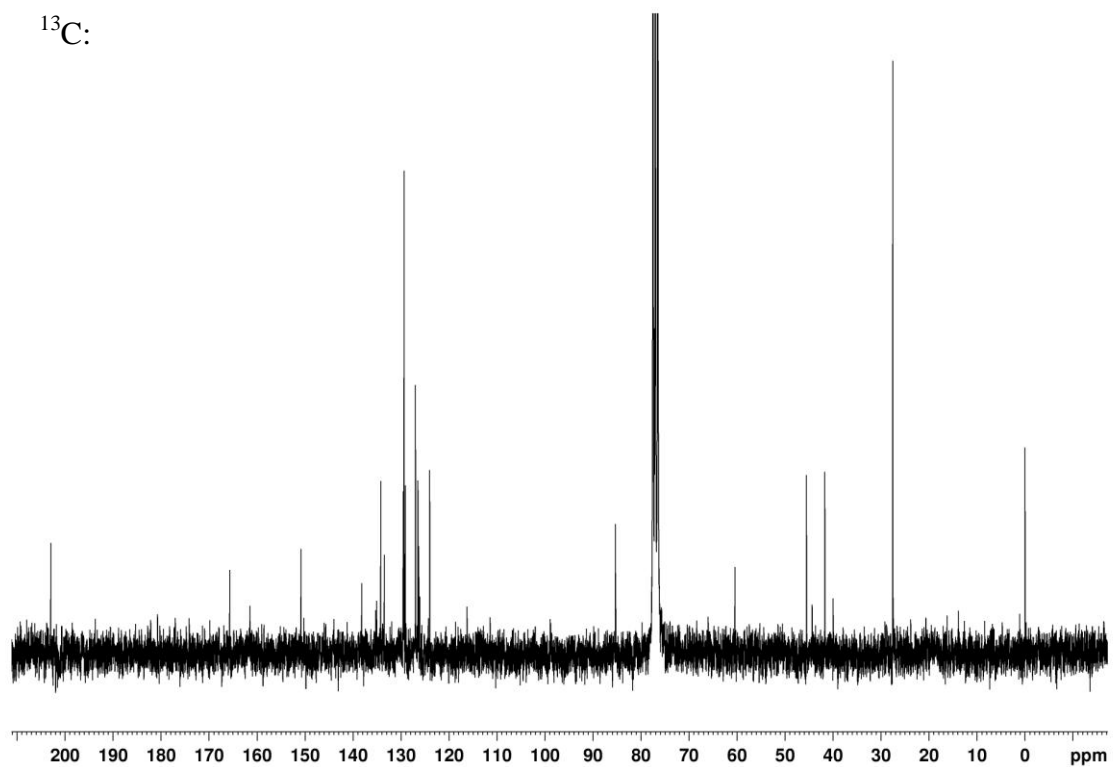

*tert*-Butyl-2-cyano-2-(3-oxo-2,3-dihydro-1H-inden-1-yl)-2-phenylacetate (**3ae**)

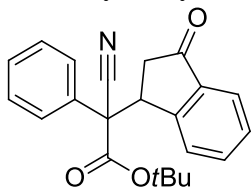

**3ea** (diastereomer b)

$^1\text{H}$ :

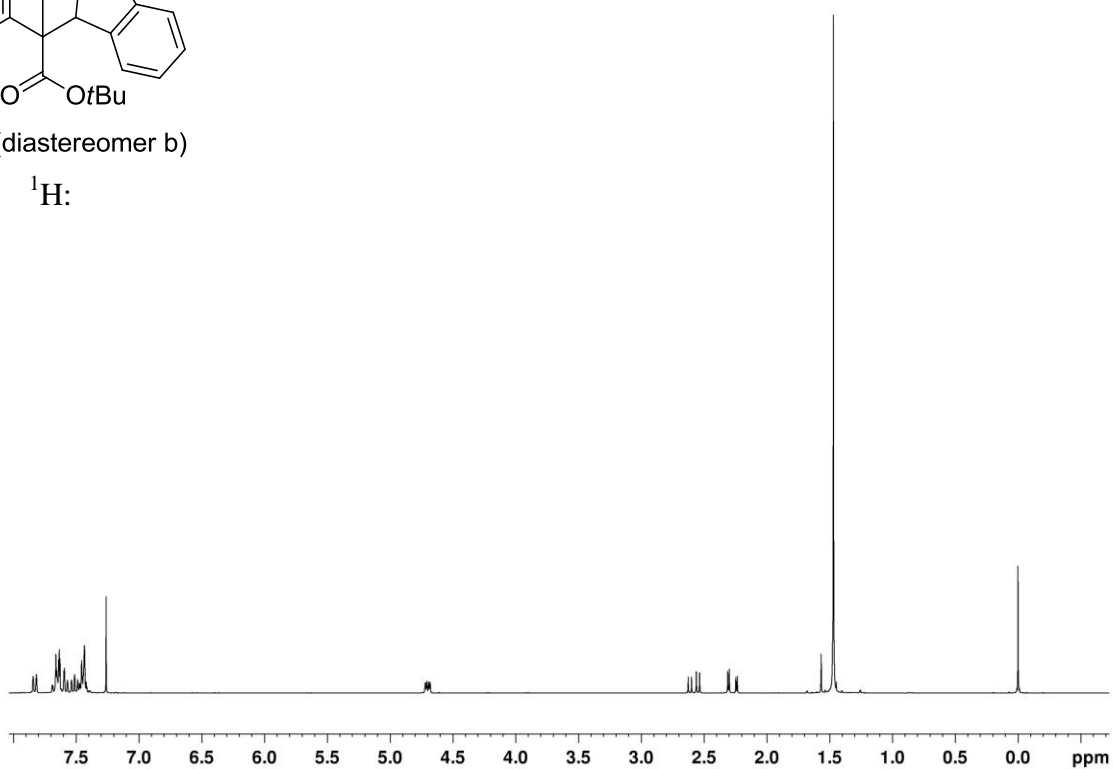

$^{13}\text{C}$ :

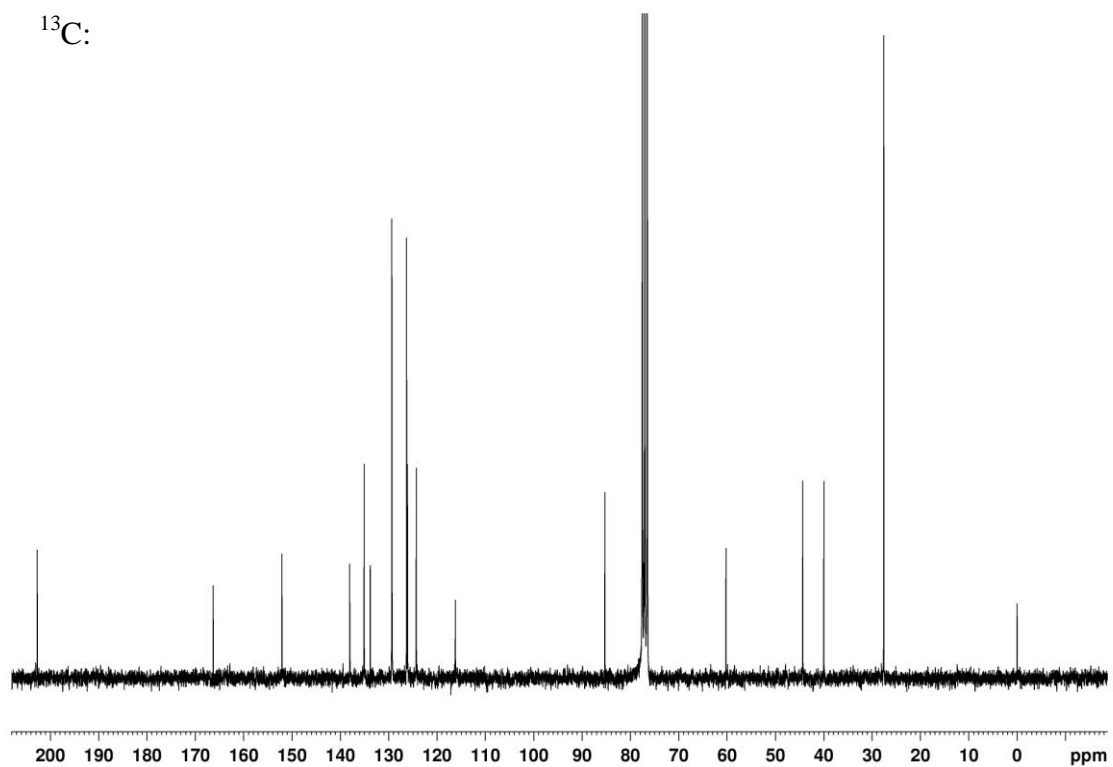

Ethyl-2-cyano-2-(3-oxocyclohexyl)-2-phenylacetate ((*R,R*)-**3a'a**)

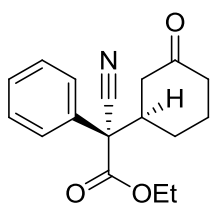

(*R,R*)-**3a'a**

$^1\text{H}$ :

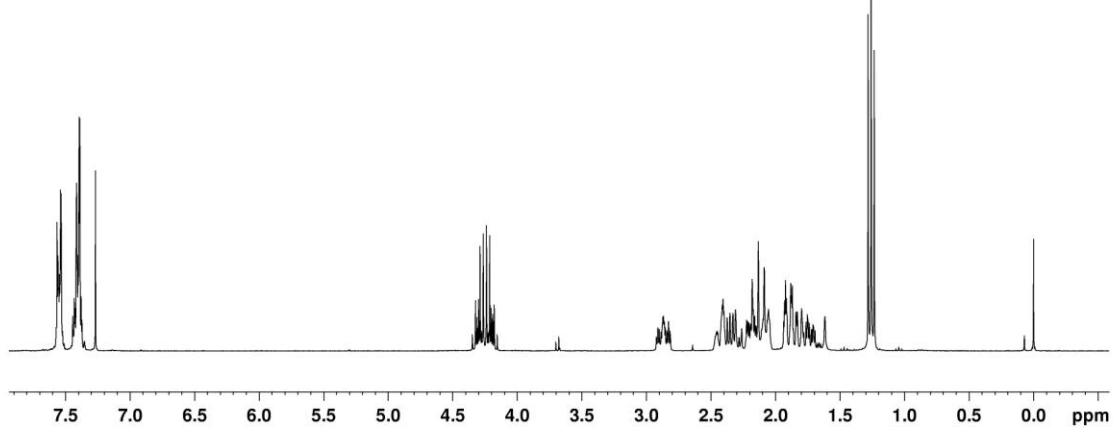

$^{13}\text{C}$ :

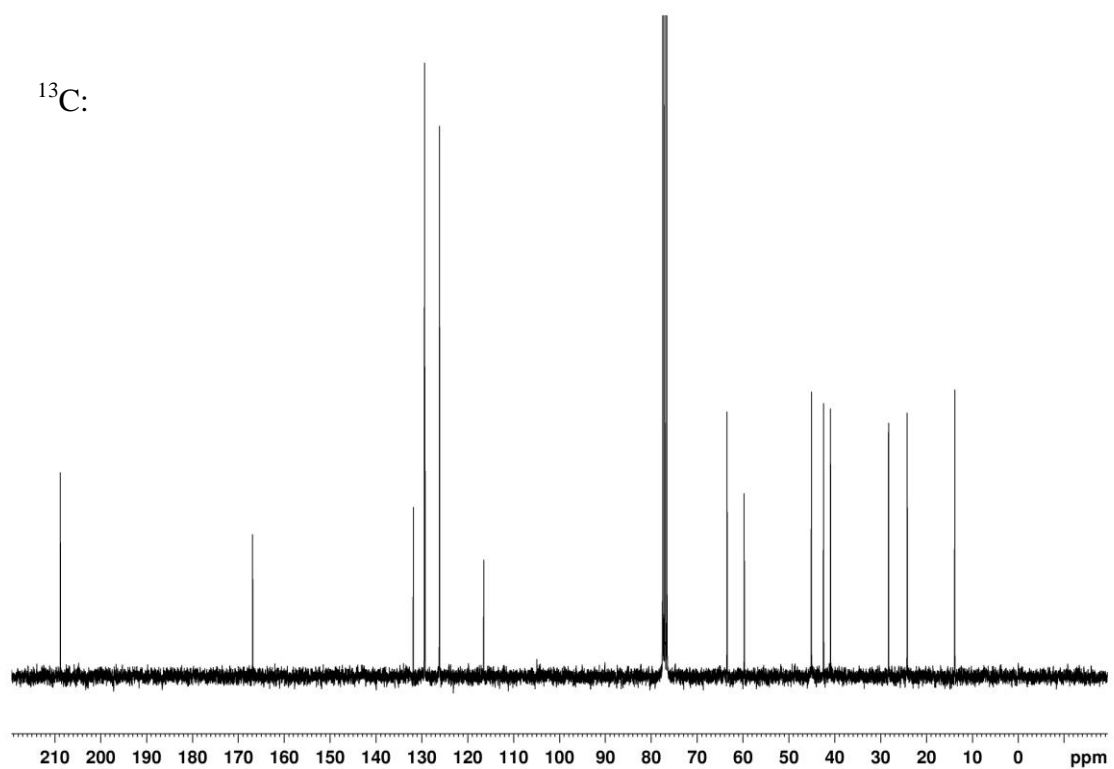

Ethyl-2-cyano-2-(3-oxocyclohexyl)-2-phenylacetate ((*S,R*)-**3a'a**)

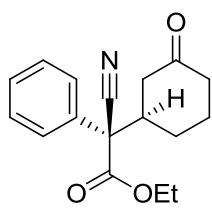

(*S,R*)-**3a'a**

$^1\text{H}$ :

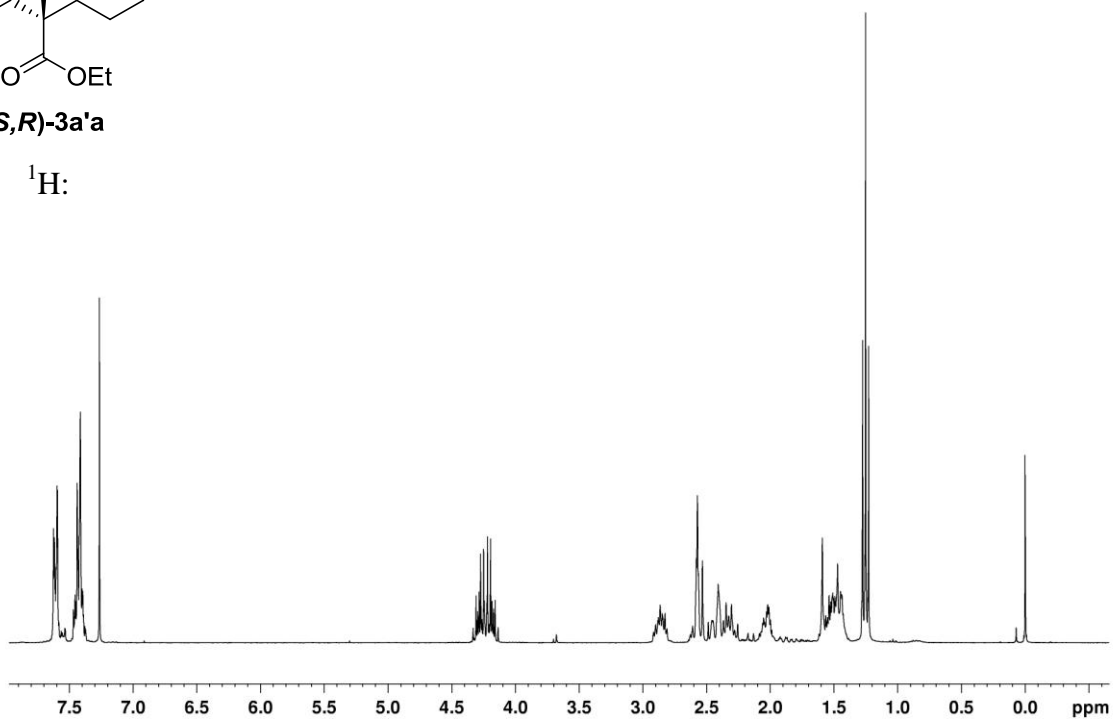

$^{13}\text{C}$ :

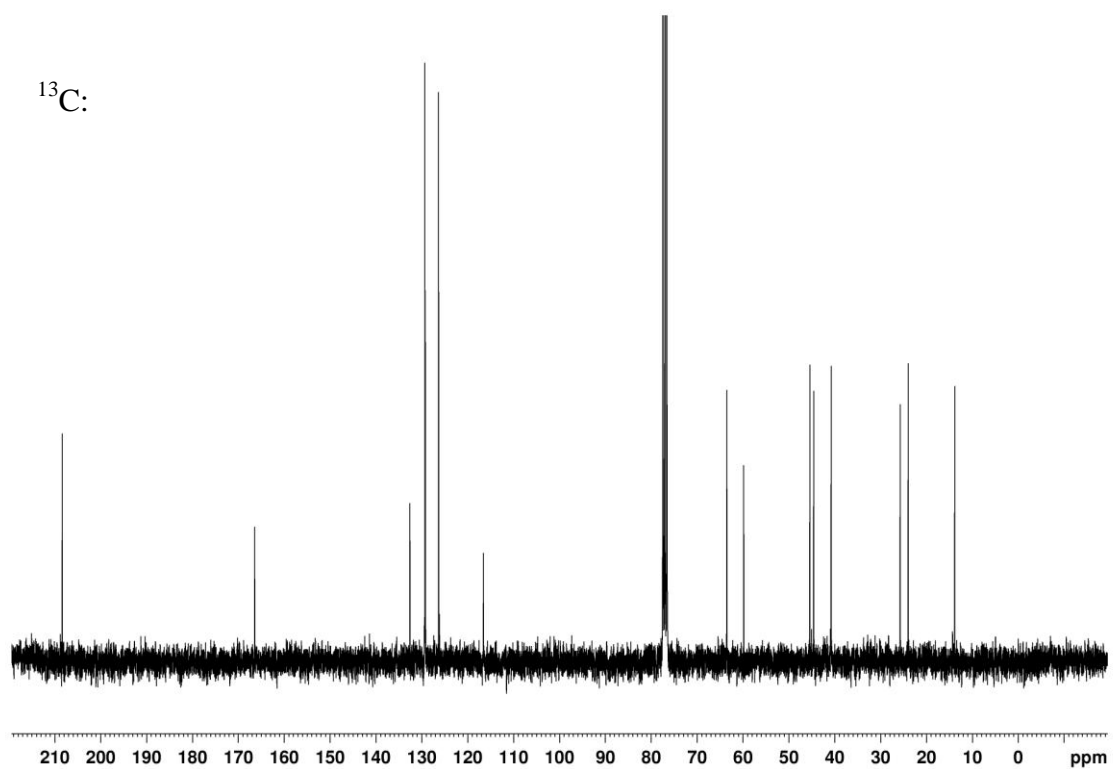



*tert*-Butyl-2-cyano-2-(3-hydroxycyclohexyl)-2-(4-methoxyphenyl)-acetate ((*R,R,S*)-6ma)

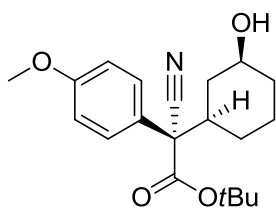

(*R,R,S*)-6ma

<sup>1</sup>H:

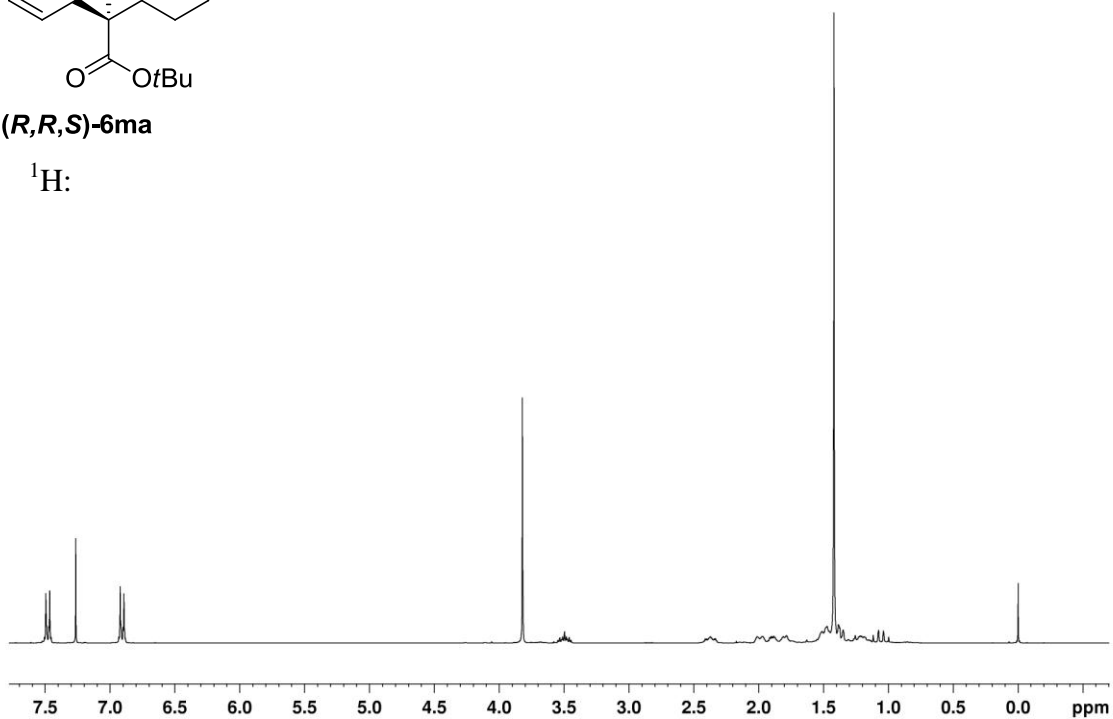

<sup>13</sup>C:

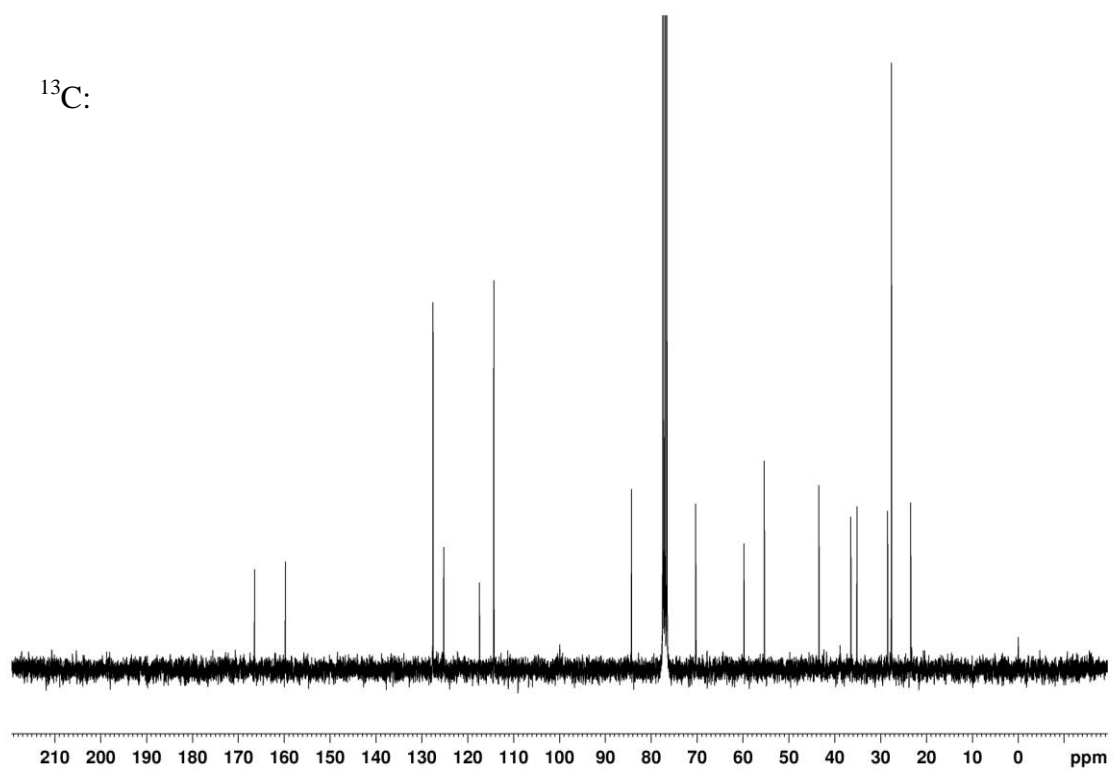

*tert*-Butyl-2-cyano-2-(3-hydroxycyclohexyl)-2-(4-methoxyphenyl)-acetate ((*S,R,S*)-**6ma**)

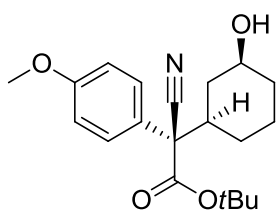

**(*S,R,S*)-6ma**

<sup>1</sup>H:

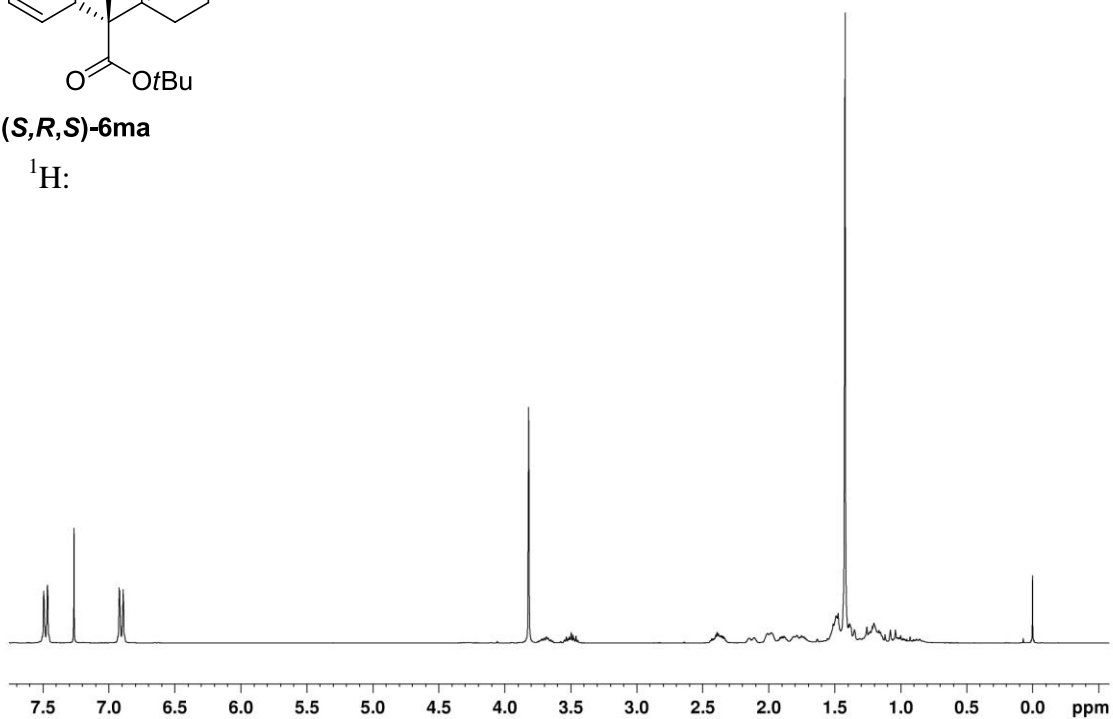

<sup>13</sup>C:

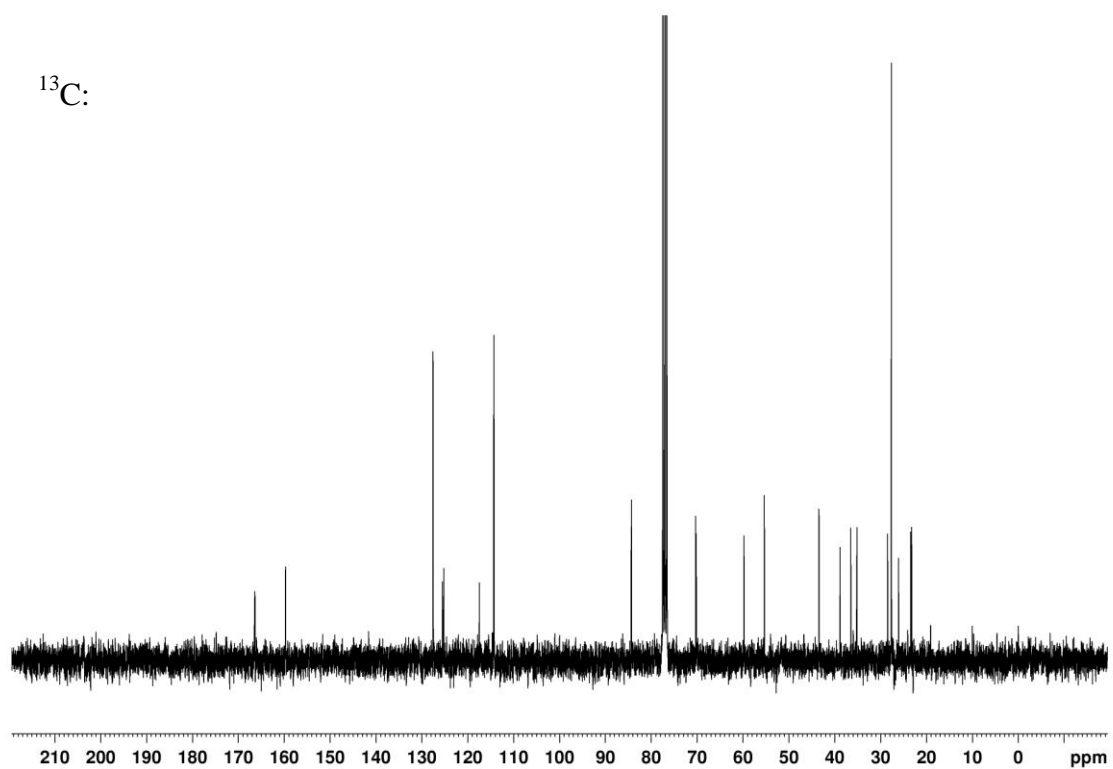

*(R)*-*tert*-Butyl-2-cyano-2-((*R*)-2-oxooxepan-4-yl)-2-phenylacetate (**(*R,R*)-4aa**)

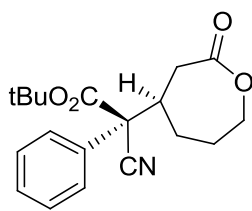

**(*R,R*)-4aa**

<sup>1</sup>H:

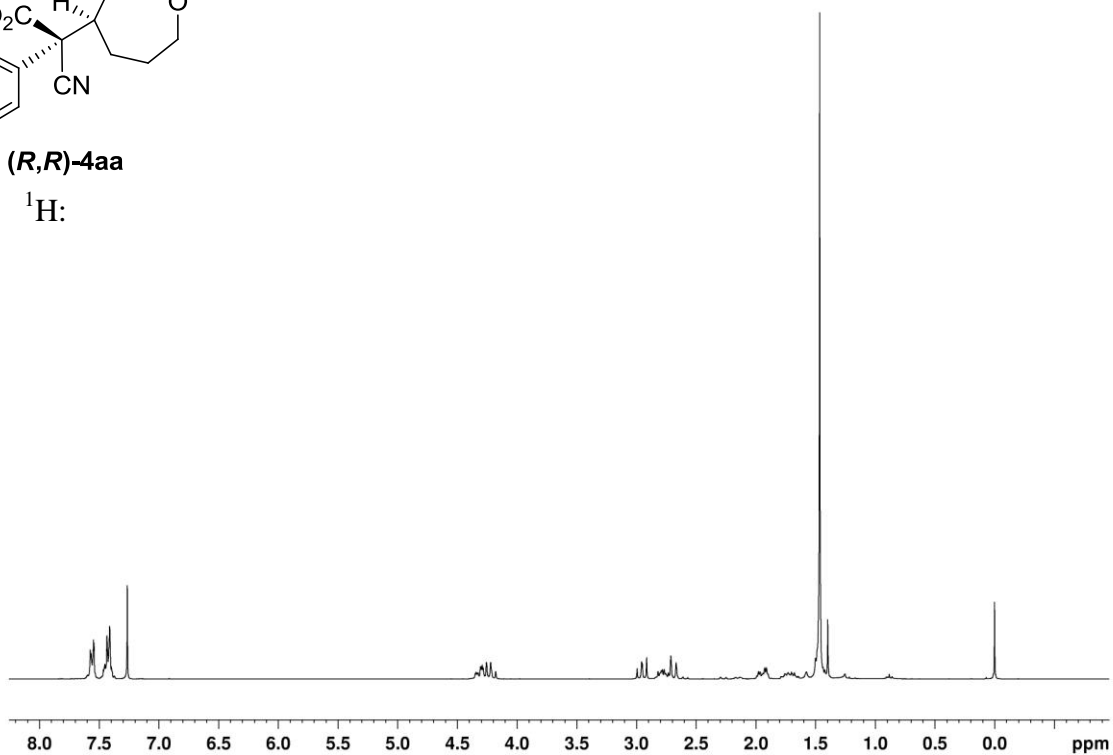

<sup>13</sup>C:

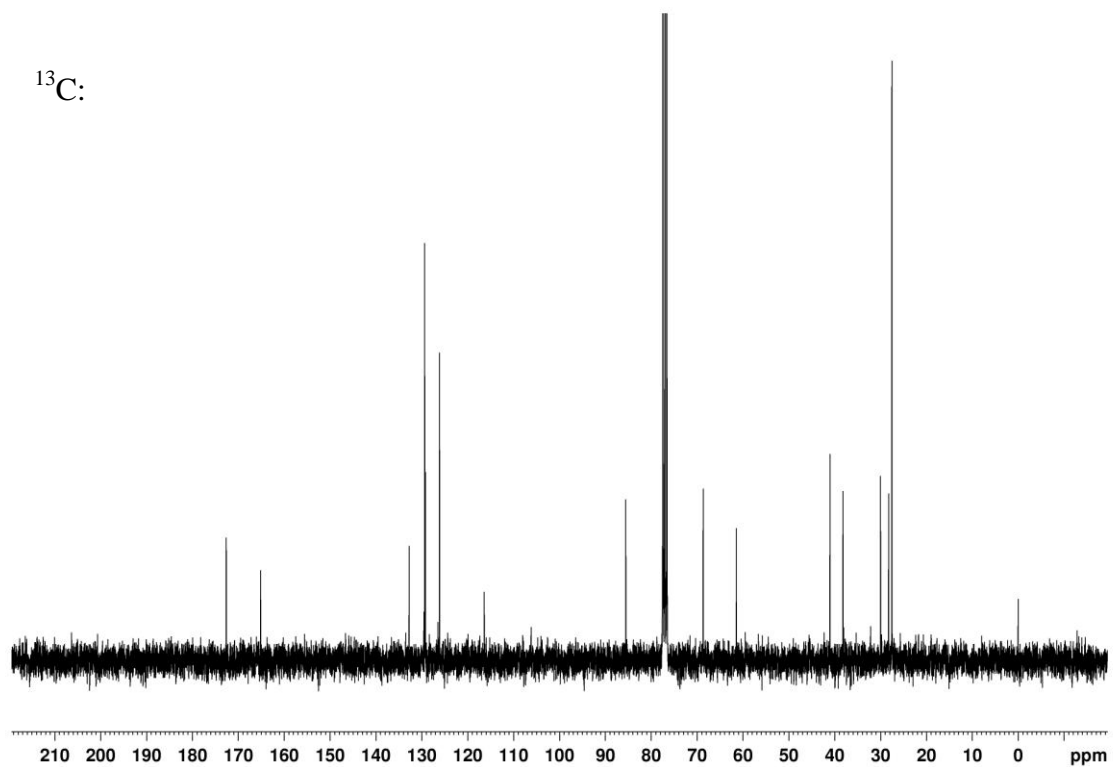

*(R)*-*tert*-Butyl-2-(4-bromophenyl)-2-cyano-2-((*R*)-2-oxooxepan-4-yl)acetate ((*R,R*)-4ia)

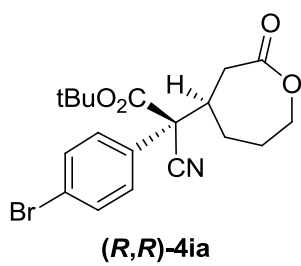

**(*R,R*)-4ia**

<sup>1</sup>H:

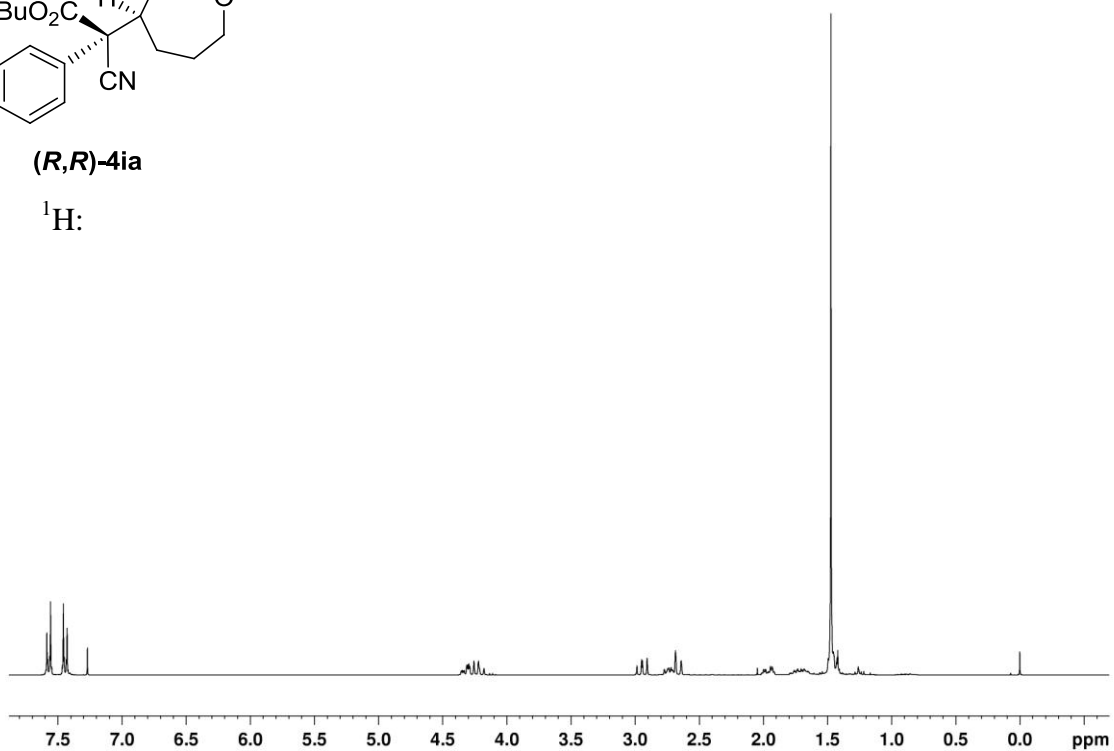

<sup>13</sup>C:

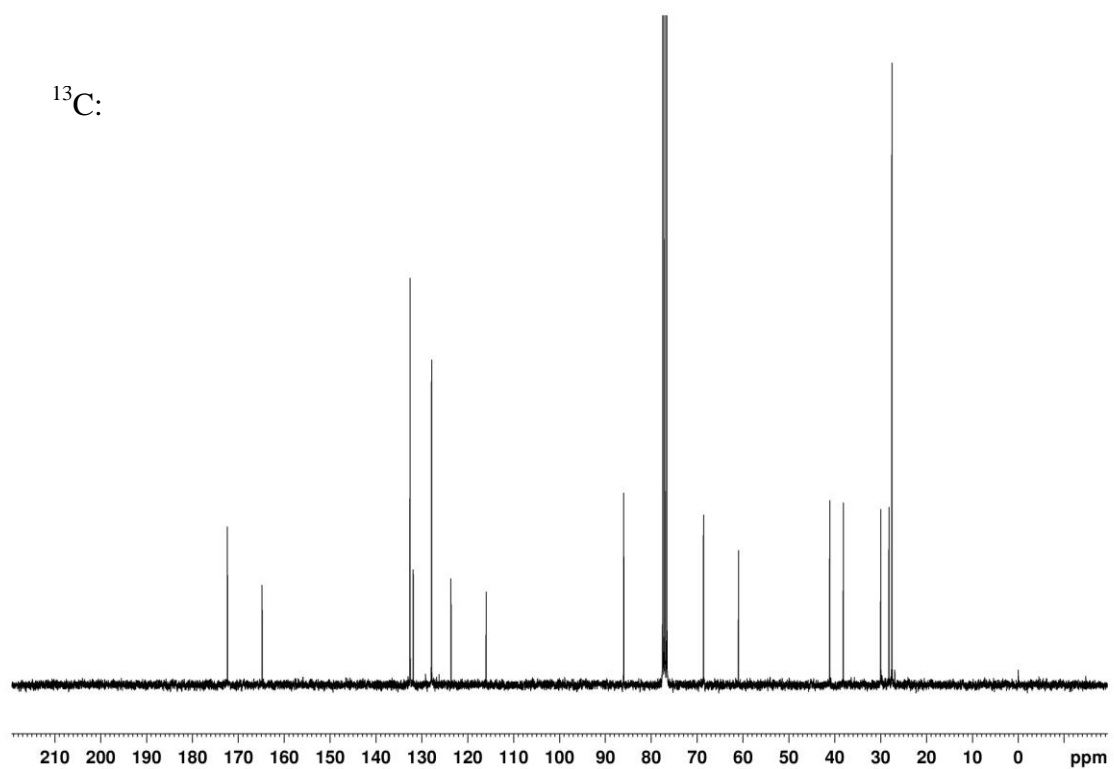

(2*R*,3*R*)-*tert*-butyl-2-cyano-3-(3-hydroxypropyl)-5-oxo-2-phenylheptanoate ((*R,R*)-**5**)

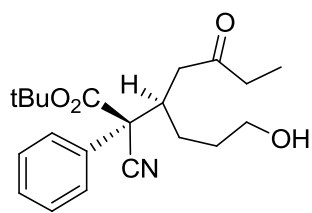

(*R,R*)-**5**

$^1\text{H}$ :

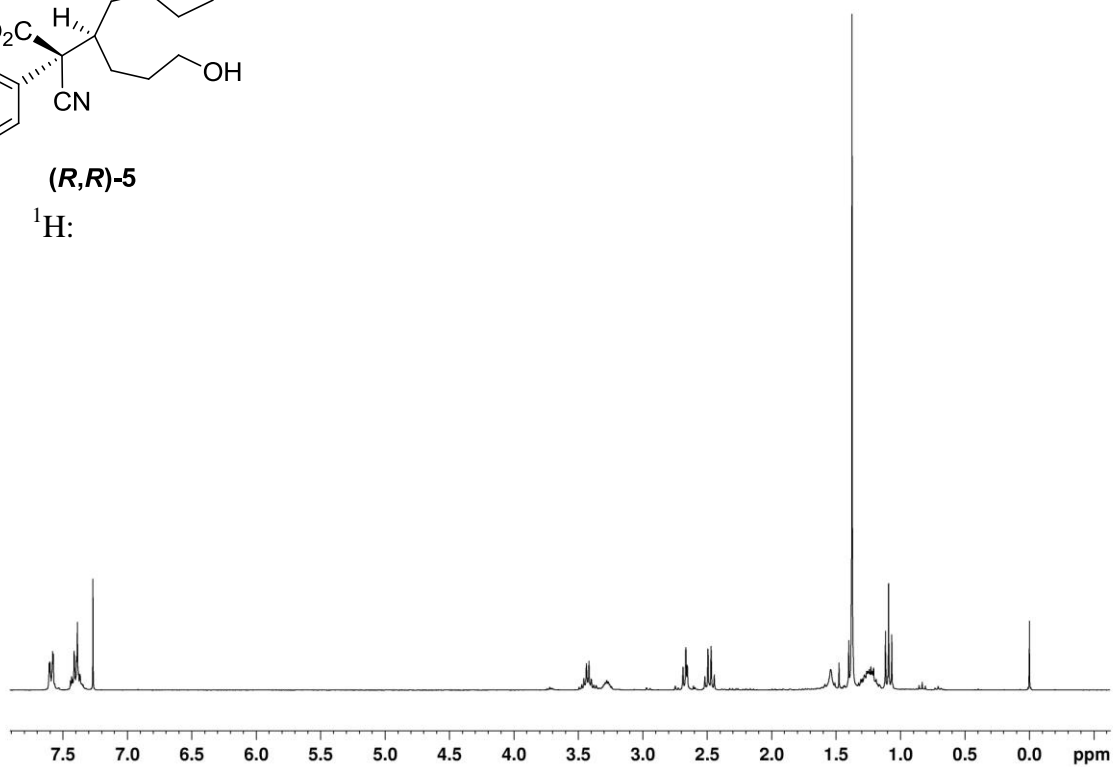

$^{13}\text{C}$ :

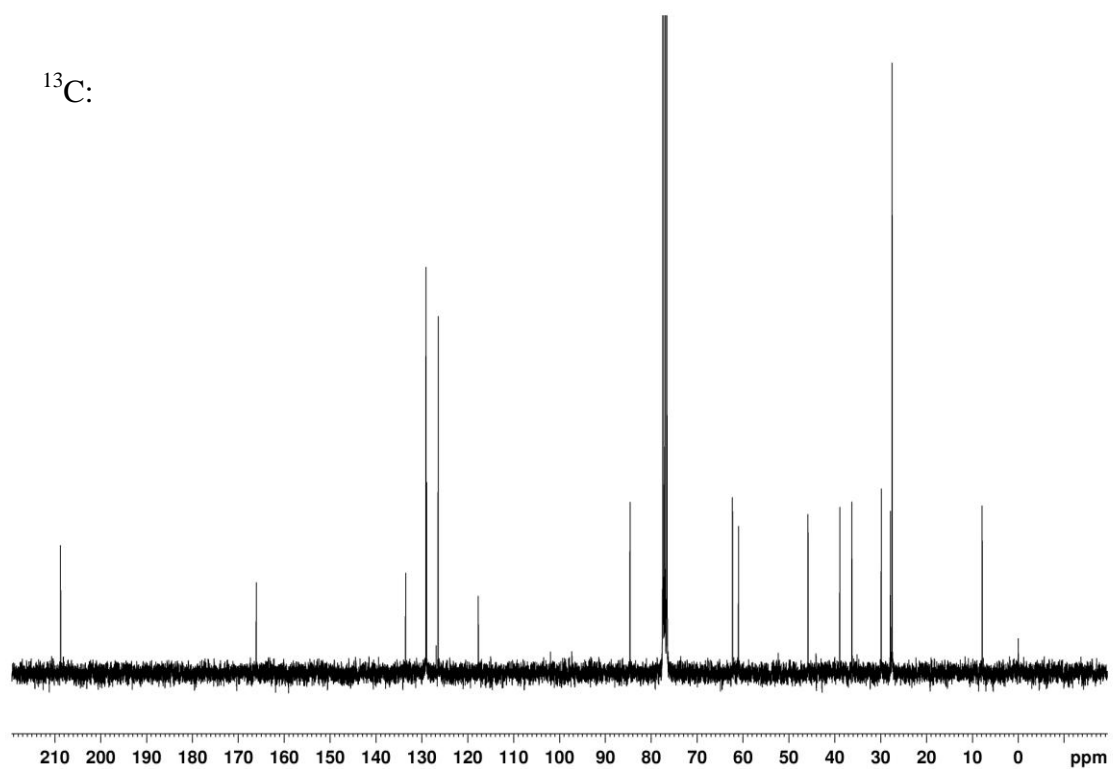

*(R)*-*tert*-Butyl-2-cyano-2-((1*R*,3*S*)-3-hydroxycyclohexyl)-2-phenylacetate ((*R,R,S*)-**6aa**)

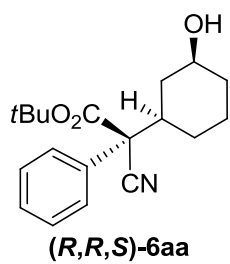

<sup>1</sup>H:

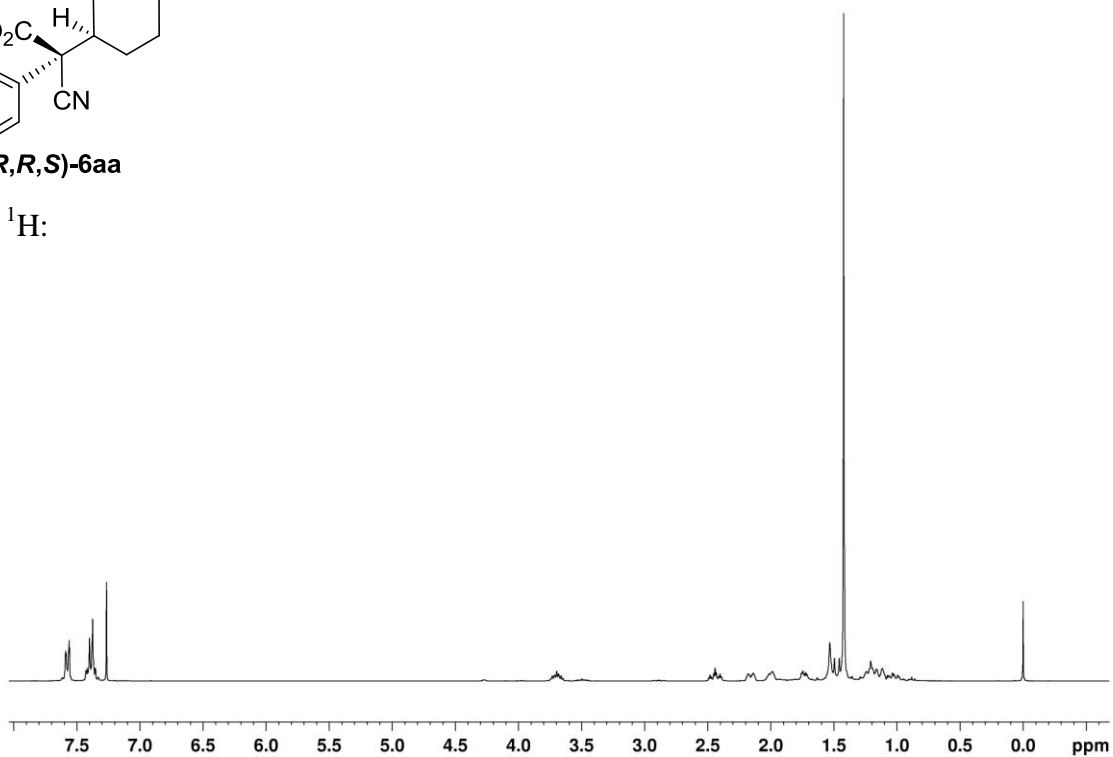

<sup>13</sup>C:

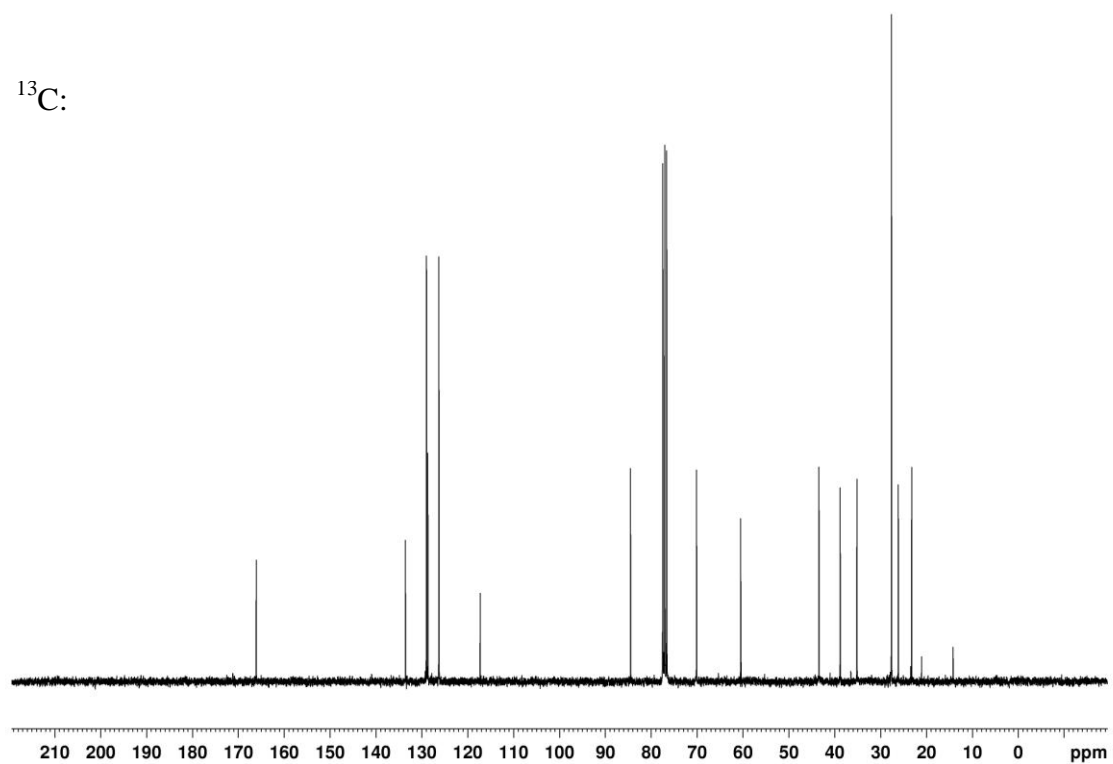

*(R)*-*tert*-Butyl-3-amino-2-((1*R*,3*S*)-3-hydroxycyclohexyl)-3-oxo-2-phenylpropanoate ((*R,R,S*)-7)

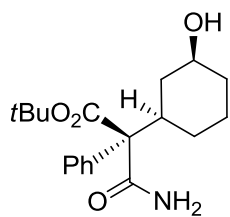

**(*R,R,S*)-7**

<sup>1</sup>H:

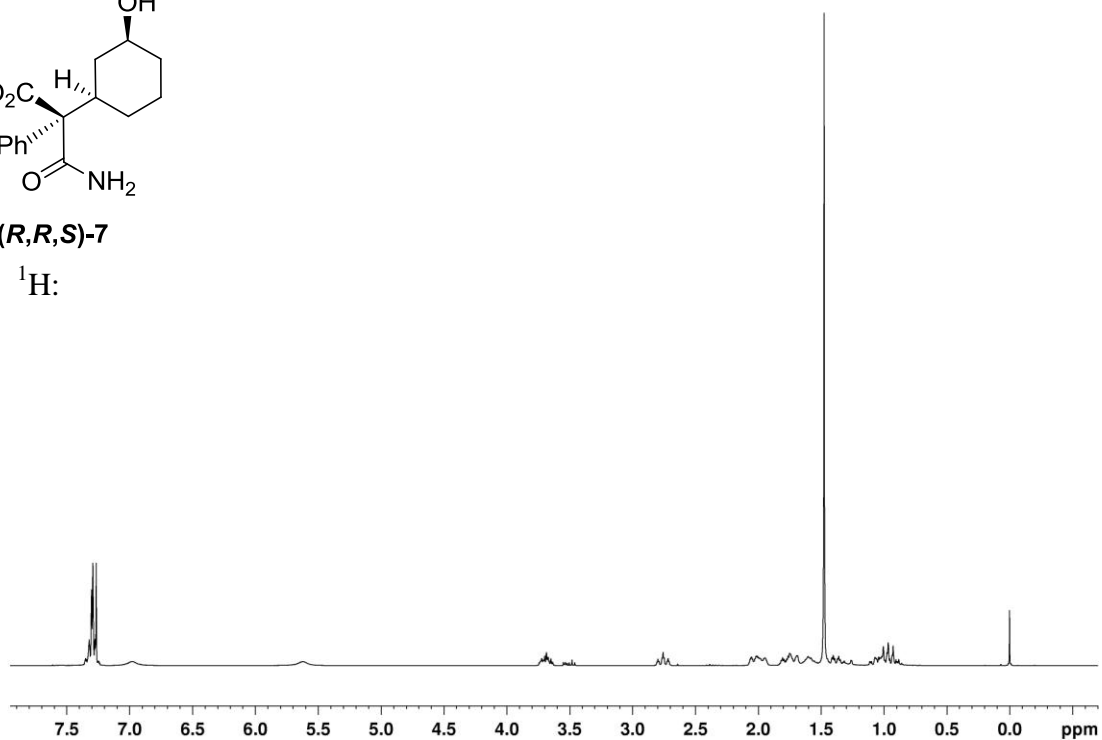

<sup>13</sup>C:

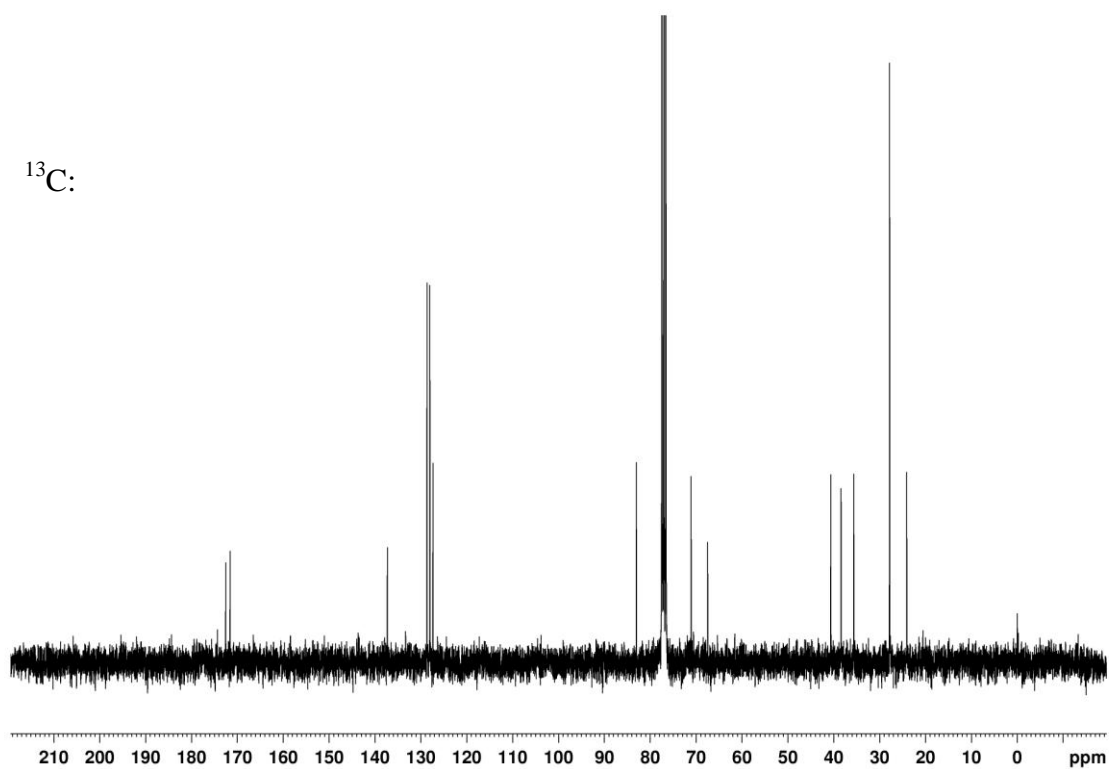

(*S*)-*tert*-Butyl-2-((*tert*-butoxycarbonyl)amino)-2-((1*R*,3*S*)-3-hydroxycyclohexyl)-2-phenylacetate ((*S*,*R*,*S*)-**8**)

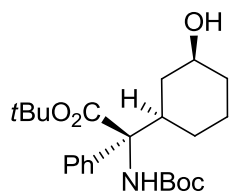

**(*S*,*R*,*S*)-8**

<sup>1</sup>H:

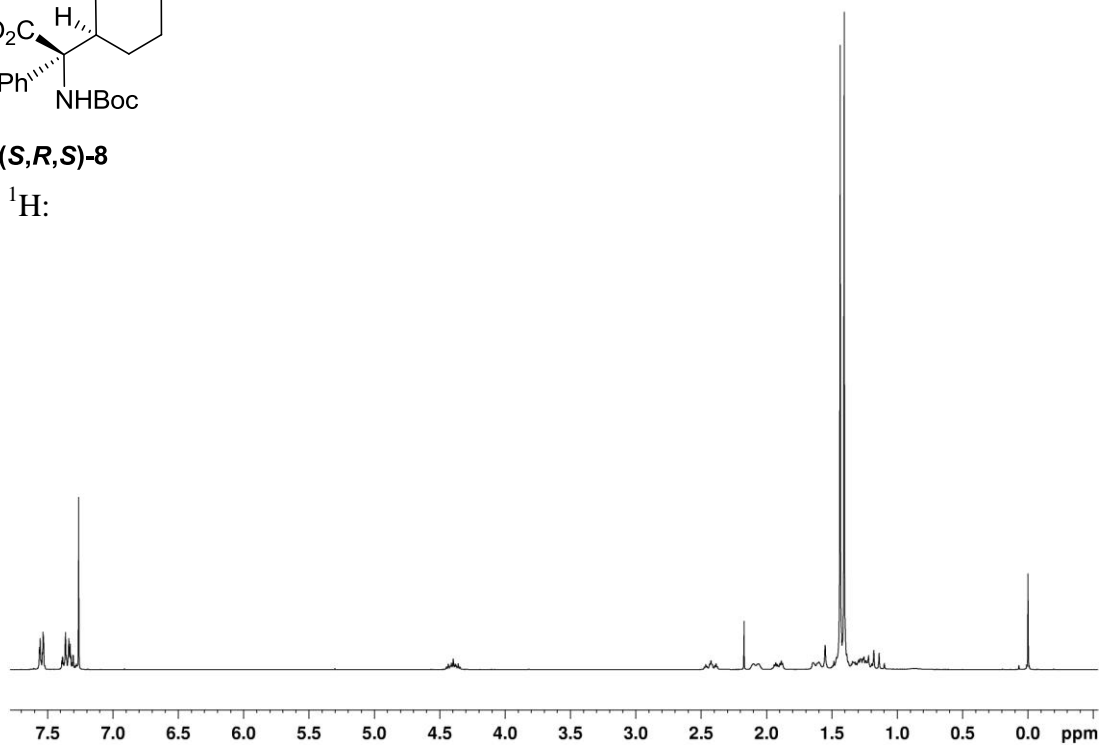

<sup>13</sup>C:

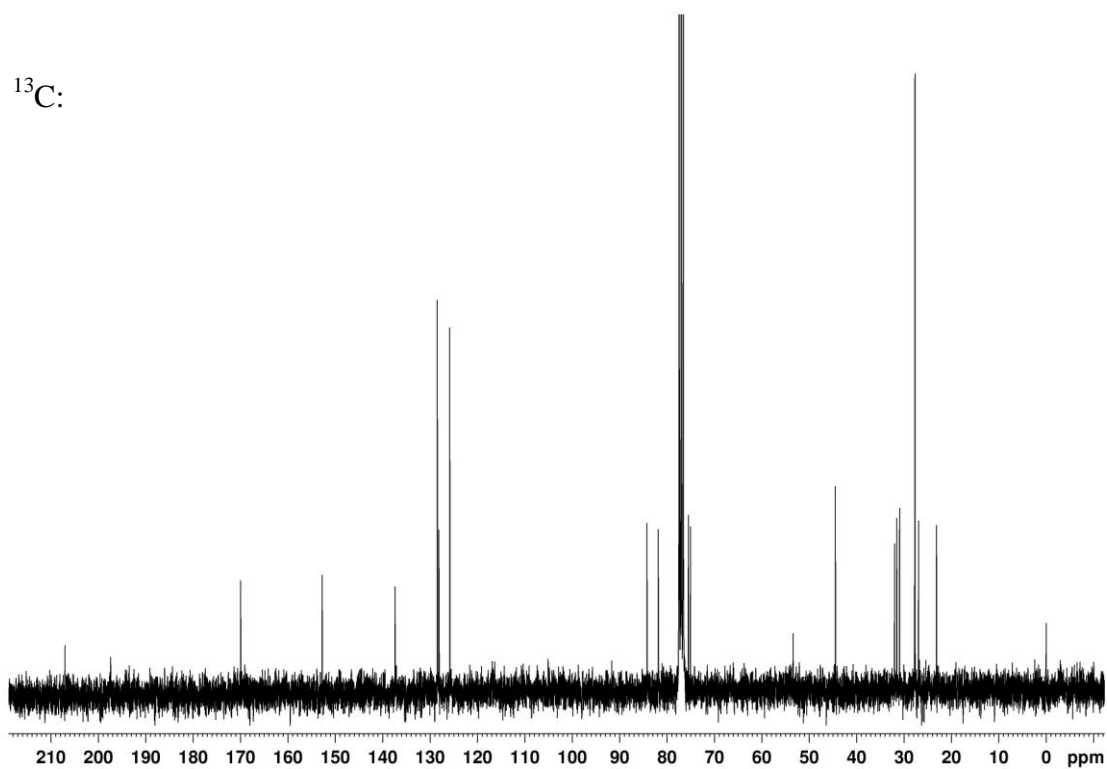



(*S*)-*tert*-Butyl-2-amino-2-((*1R,3S*)-3-hydroxycyclohexyl)-2-phenylacetate

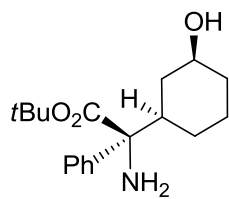

$^1\text{H}$ :

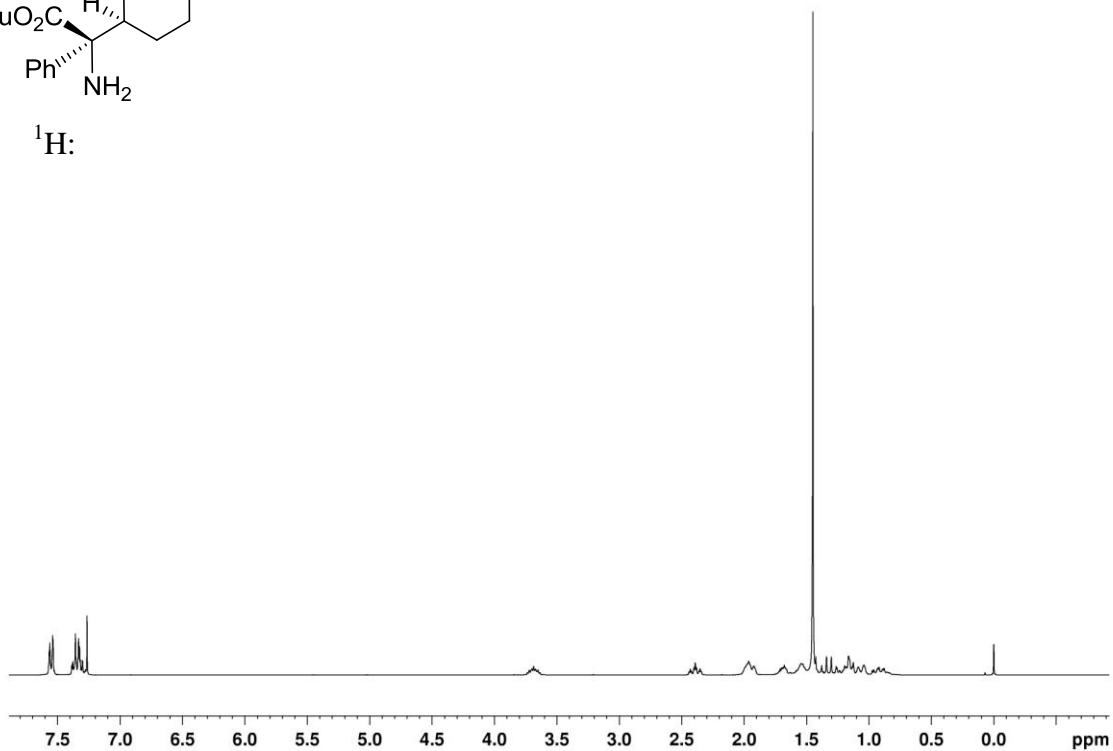

$^{13}\text{C}$ :

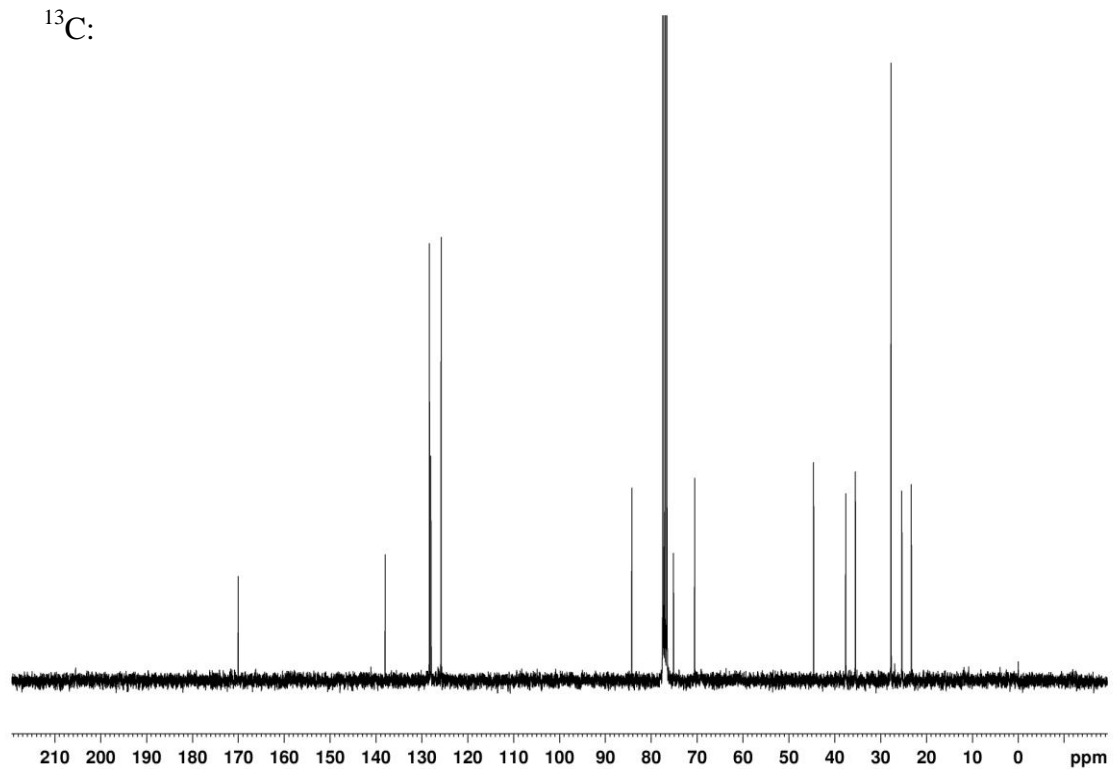

(*R*)-*tert*-Butyl-2-cyano-2-((1*R*,3*S*)-3-methoxycyclohexyl)-2-phenylacetate

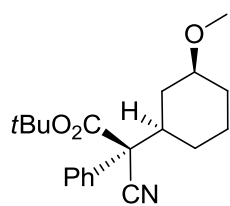

$^1\text{H}$ :

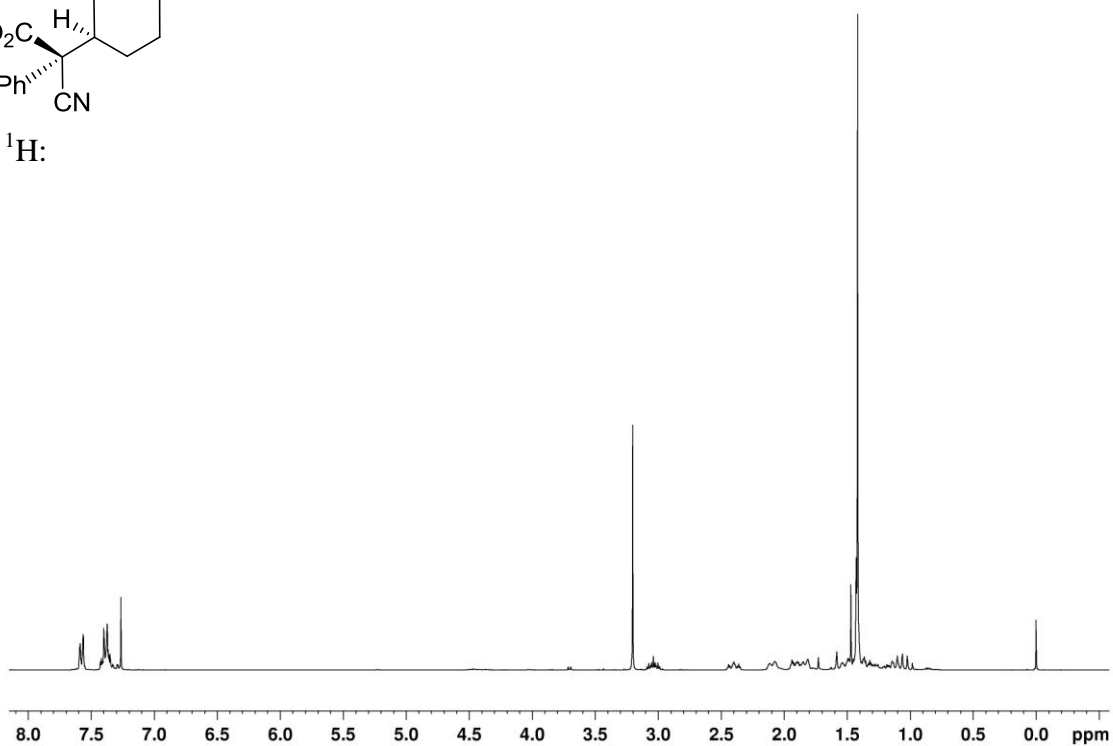

$^{13}\text{C}$ :

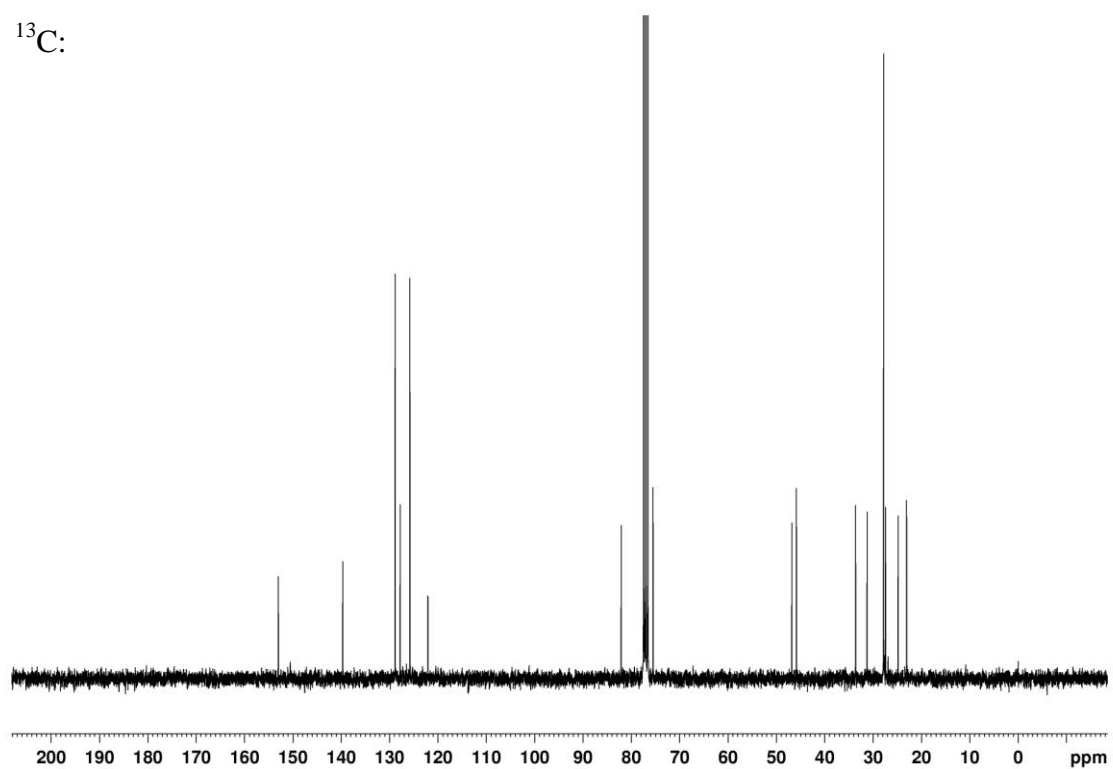

(*R*)-2-cyano-2-((1*R*,3*S*)-3-methoxycyclohexyl)-2-phenylacetamide ((*R,R,S*)-**9**)

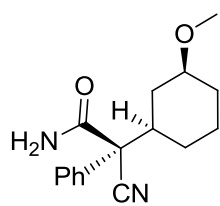

**(*R,R,S*)-9**

<sup>1</sup>H:

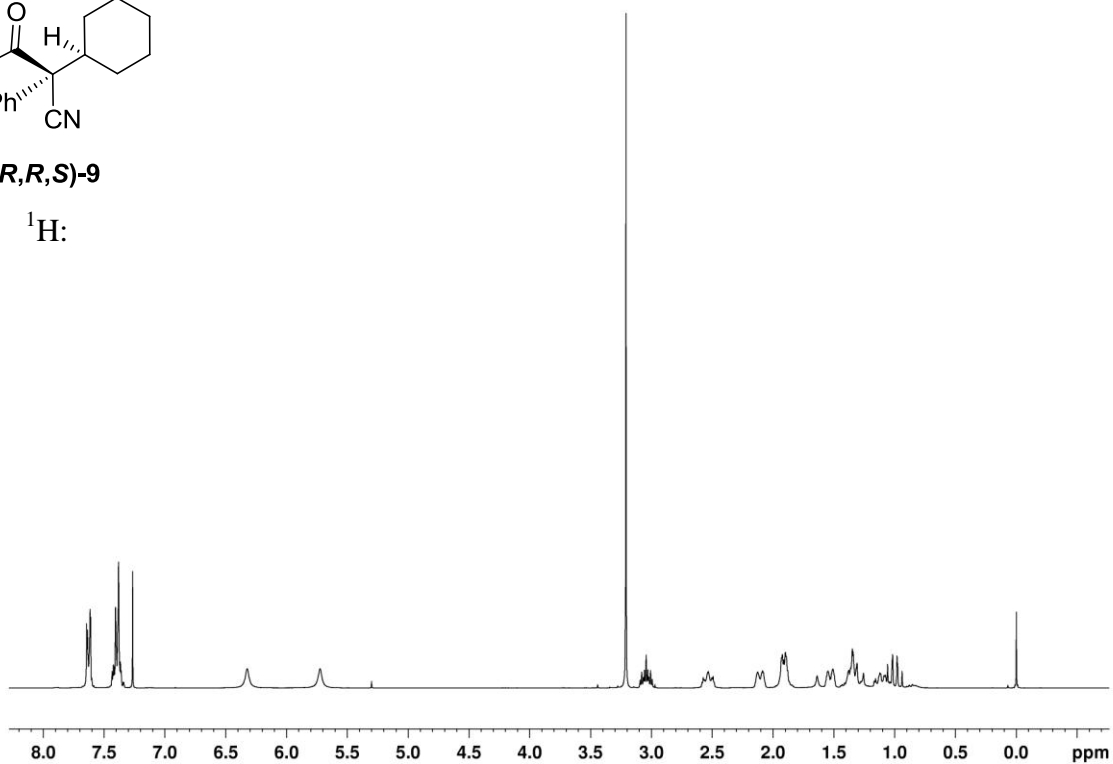

<sup>13</sup>C:

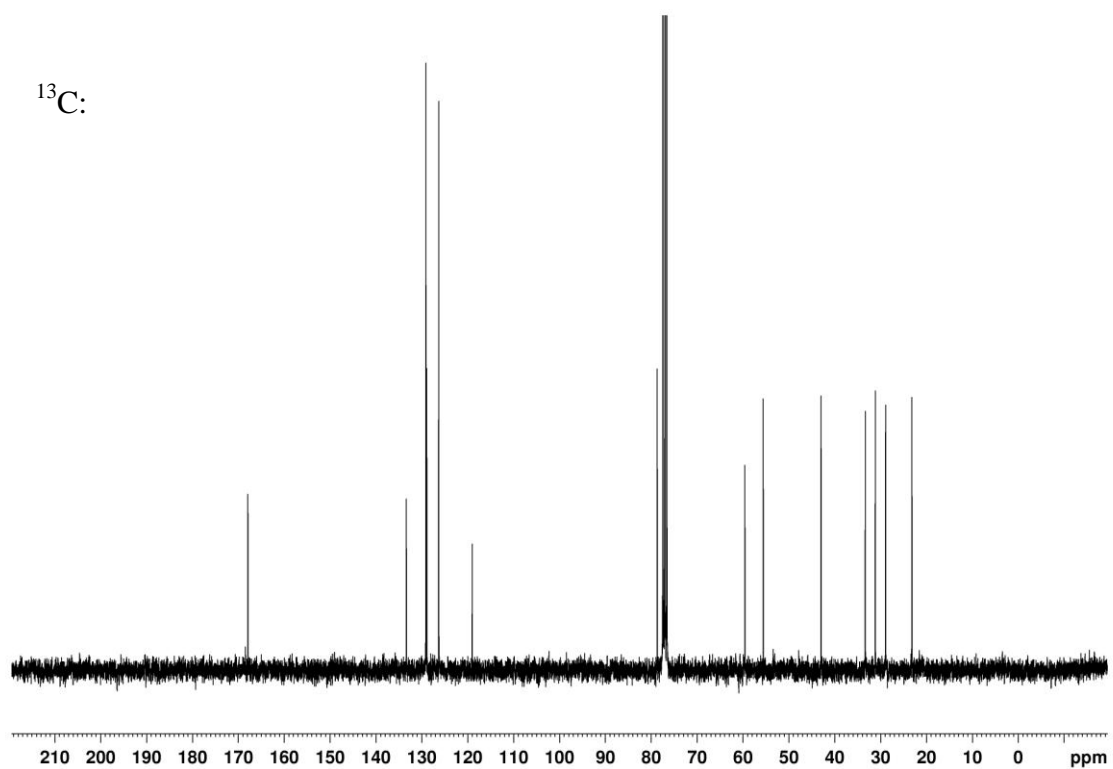

*(R)*-5-((*1R,3S*)-3-methoxycyclohexyl)-5-phenylimidazolidine-2,4-dione (***(R,R,S)*-10**)

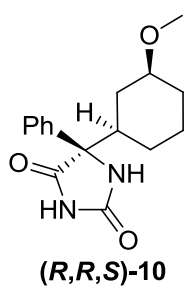

<sup>1</sup>H:

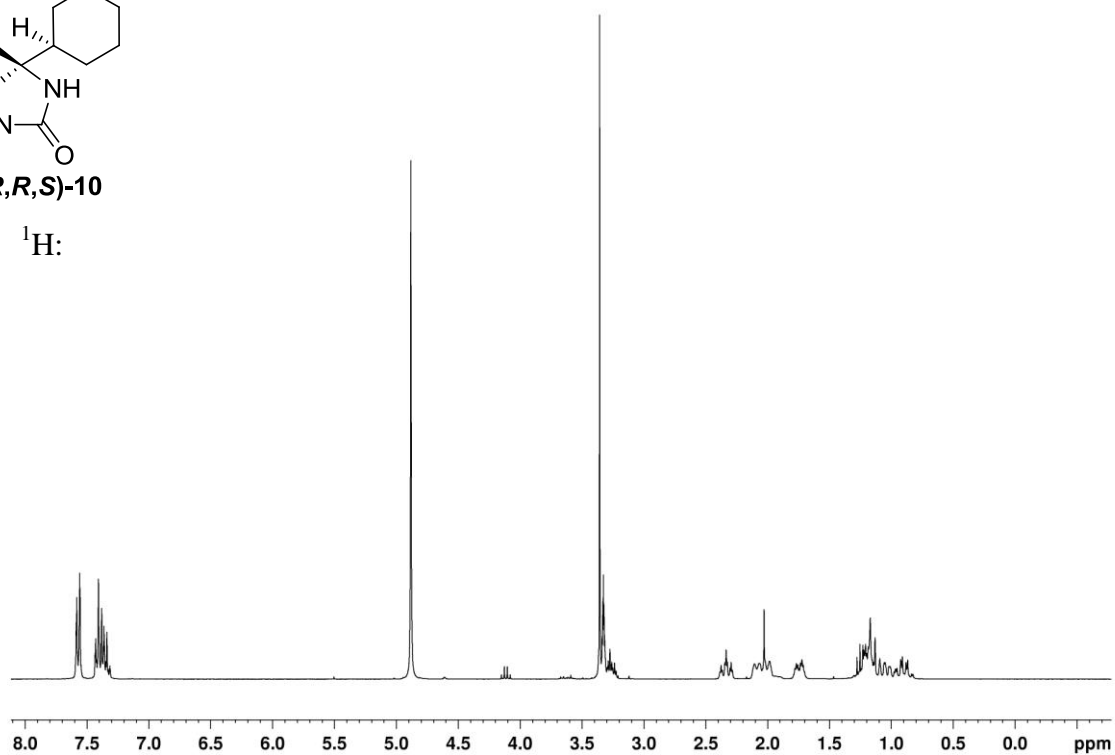

<sup>13</sup>C:

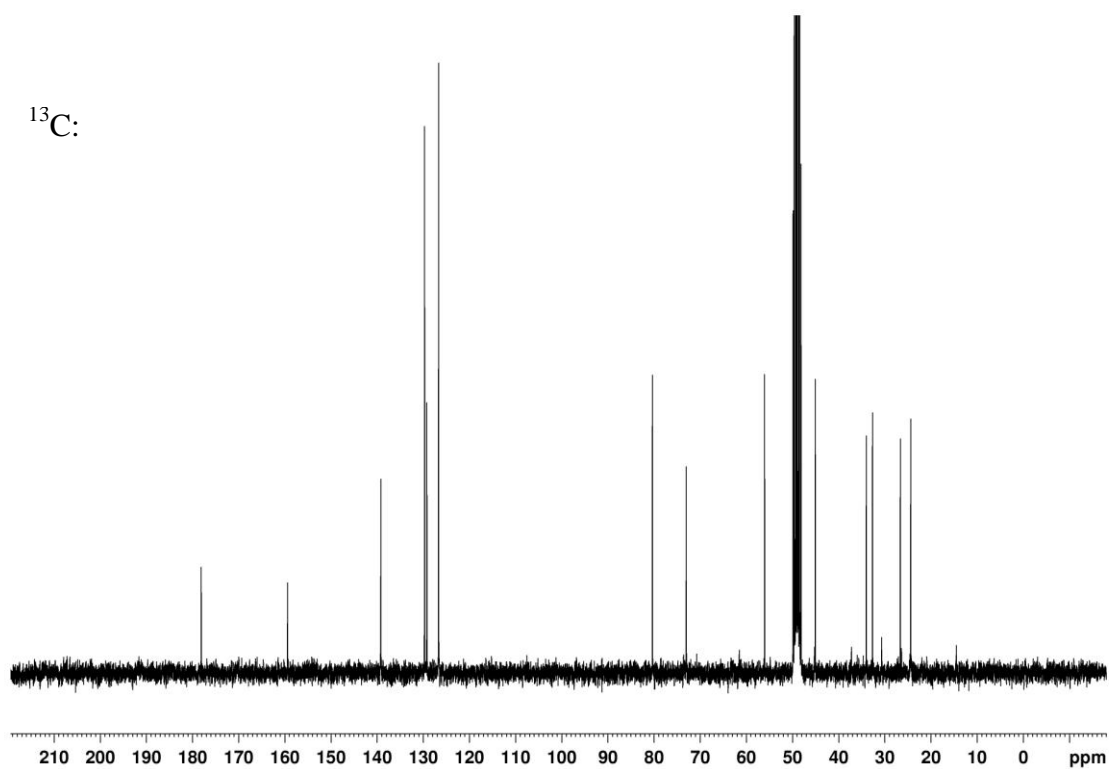

(*S*)-*tert*-Butyl-2-(4-chlorophenyl)-2-cyano-2-((*R*)-6,6-dimethyl-2-oxooxepan-4-yl)acetate  
(*(S,R)*-4hd)

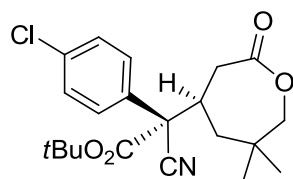

(*S,R*)-4hd

$^1\text{H}$ :

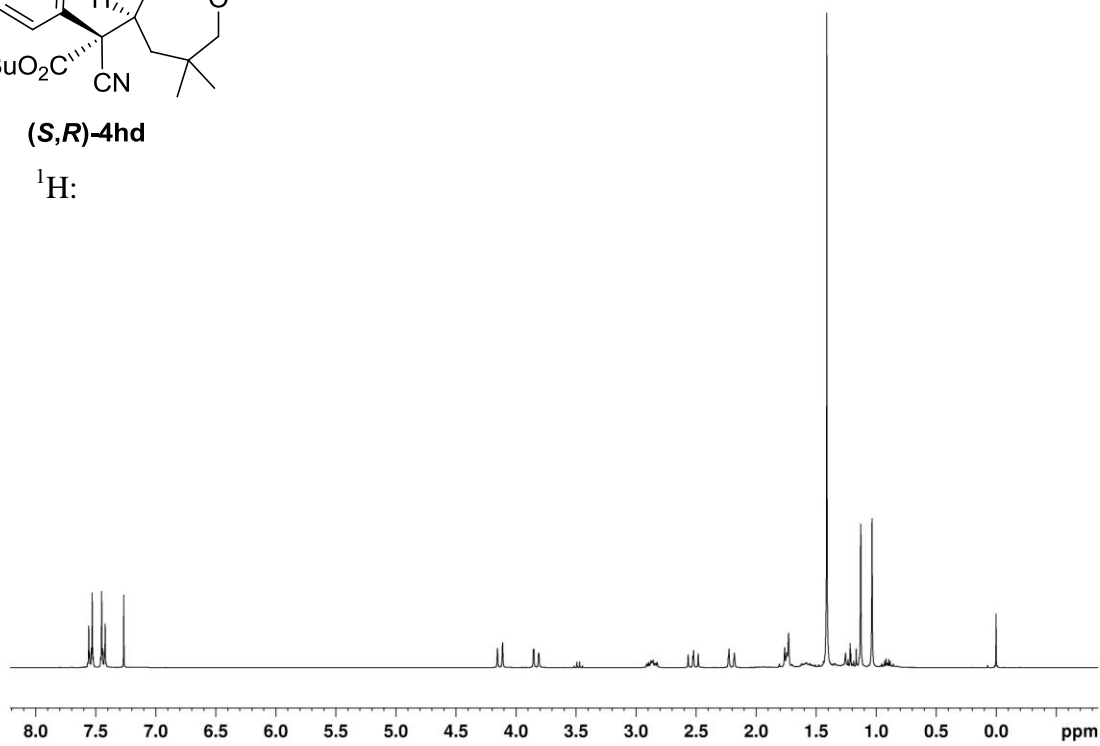

$^{13}\text{C}$ :

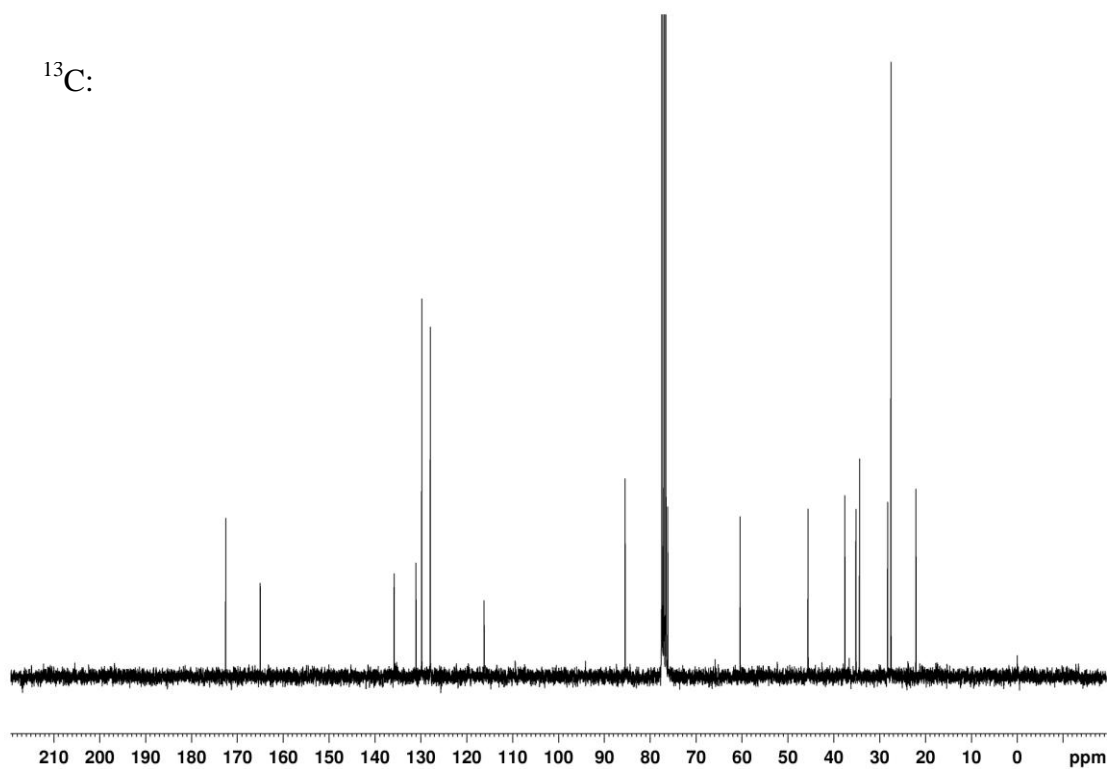

(*S*)-*tert*-Butyl-2-cyano-2-((1*R*,3*S*)-3-hydroxycyclohexyl)-2-phenylacetate ((*S,R,S*)-**6aa**)

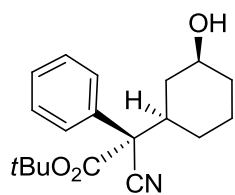

(*S,R,S*)-**6aa**

<sup>1</sup>H:

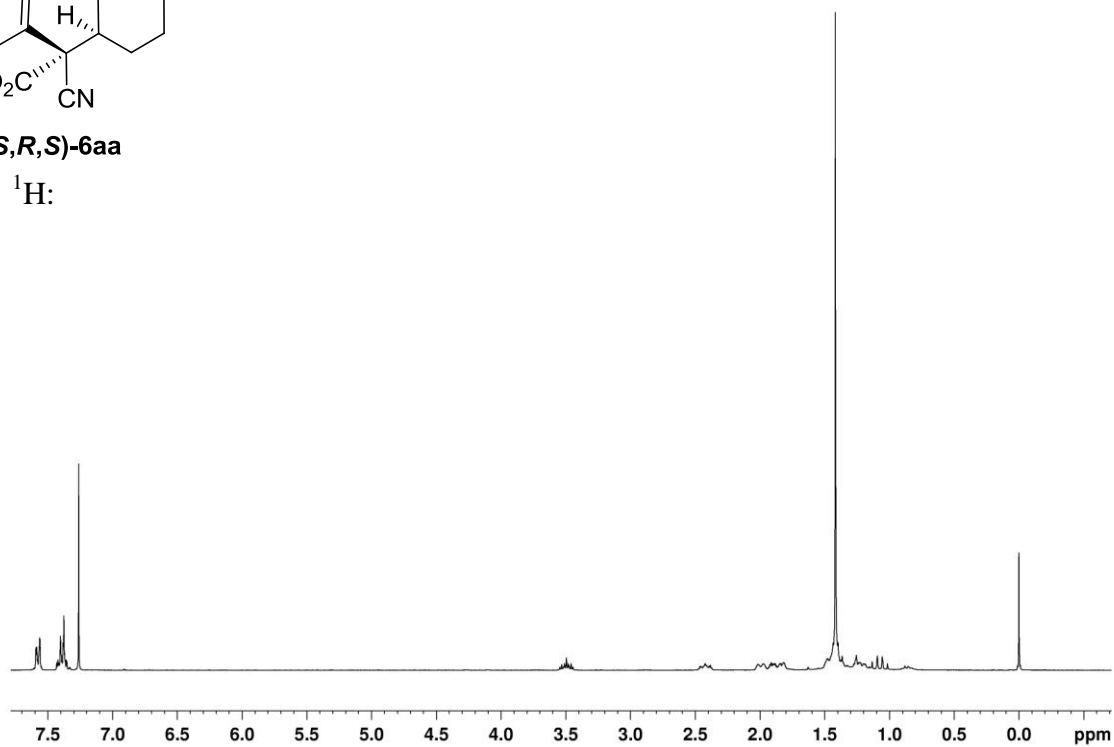

<sup>13</sup>C:

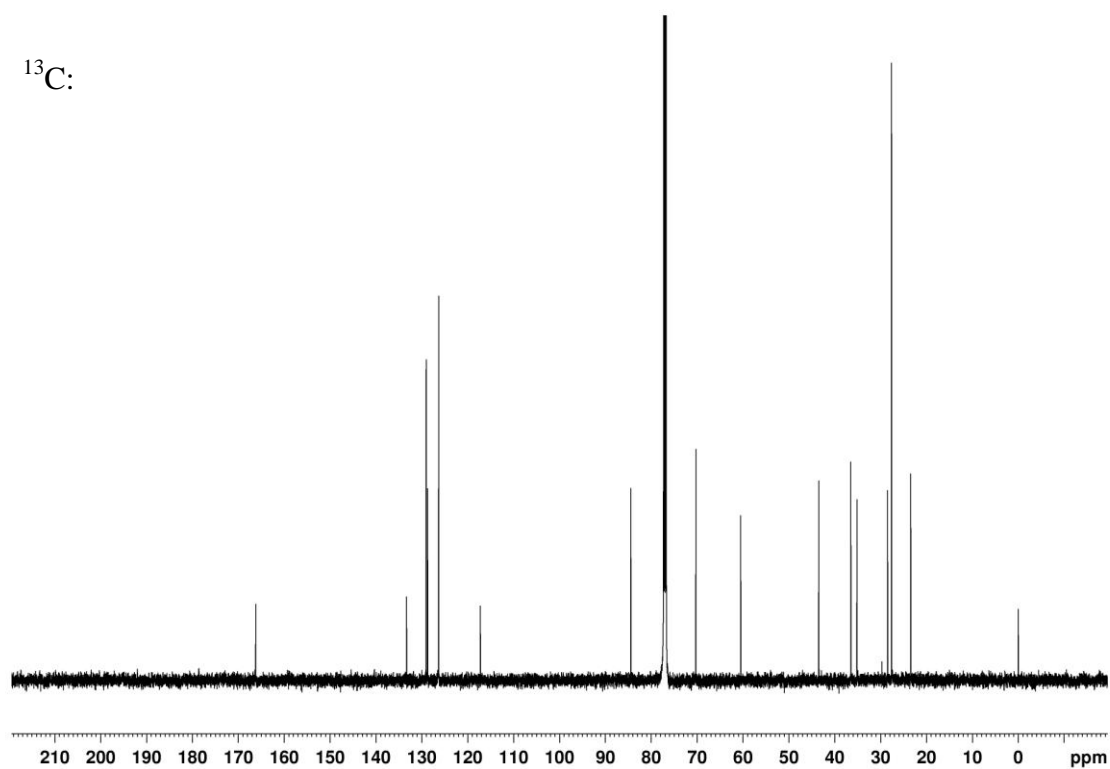

*(S)*-*tert*-Butyl-3-amino-2-((*1R,3S*)-3-hydroxycyclohexyl)-3-oxo-2-phenylpropanoate (*(S,R,S)*-7)

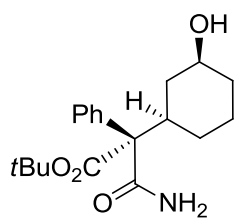

*(S,R,S)*-7

<sup>1</sup>H:

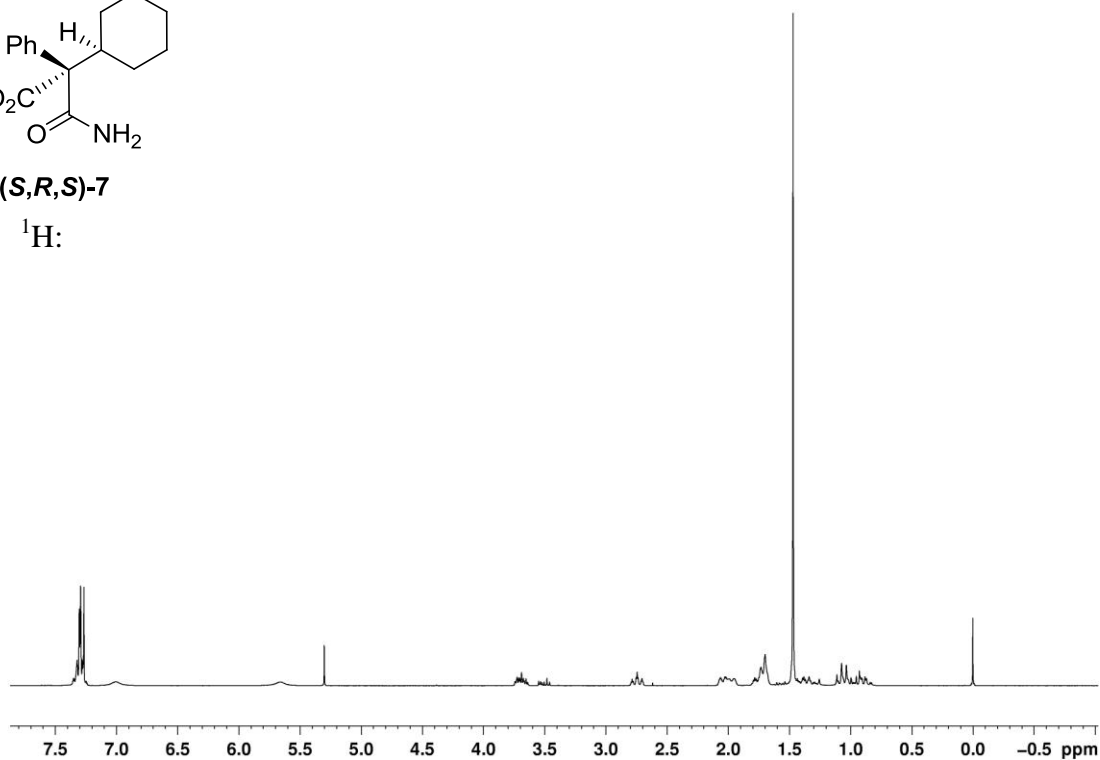

<sup>13</sup>C:

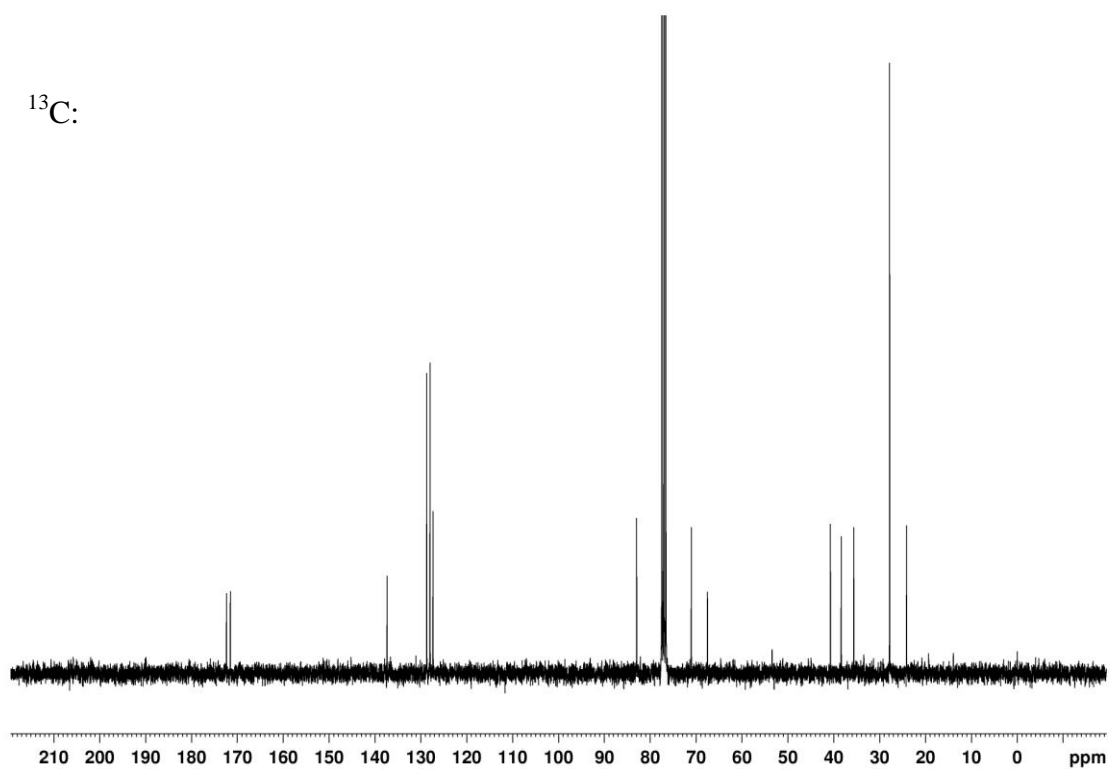

(*R*)-*tert*-Butyl-2-((*tert*-butoxycarbonyl)amino)-2-((1*R*,3*S*)-3-hydroxycyclohexyl)-2-phenylacetate ((*R,R,S*)-**8**)

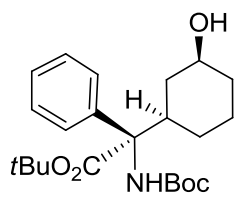

(*R,R,S*)-**8**  
<sup>1</sup>H:

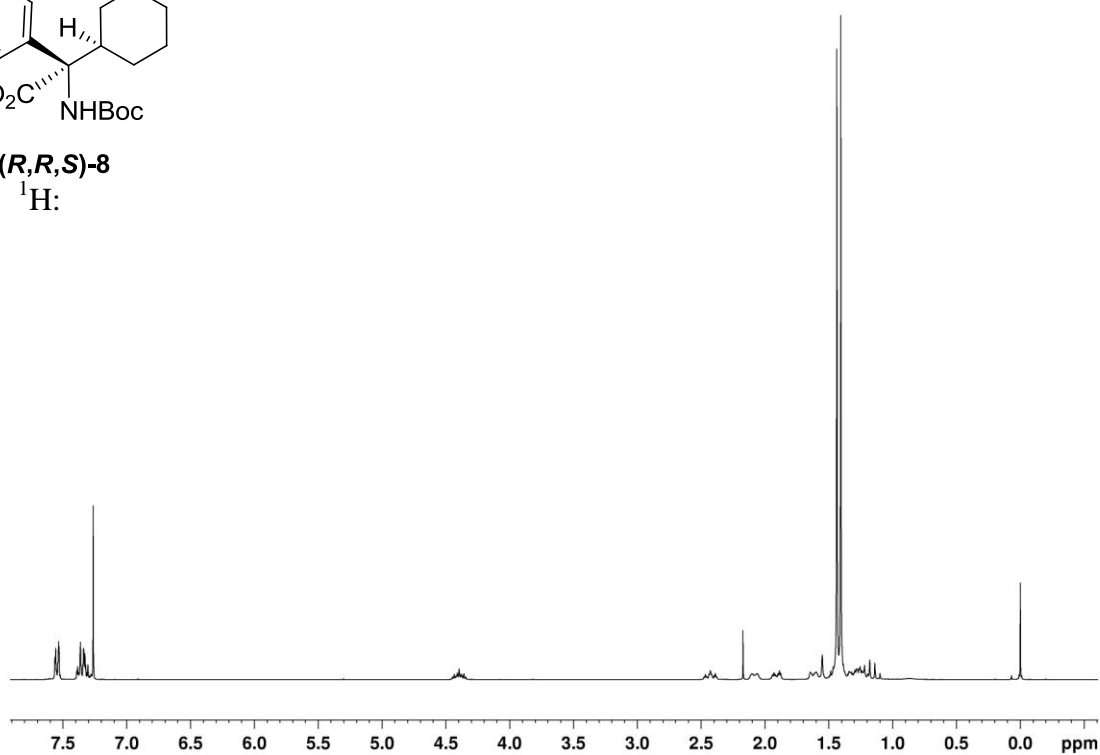

<sup>13</sup>C:

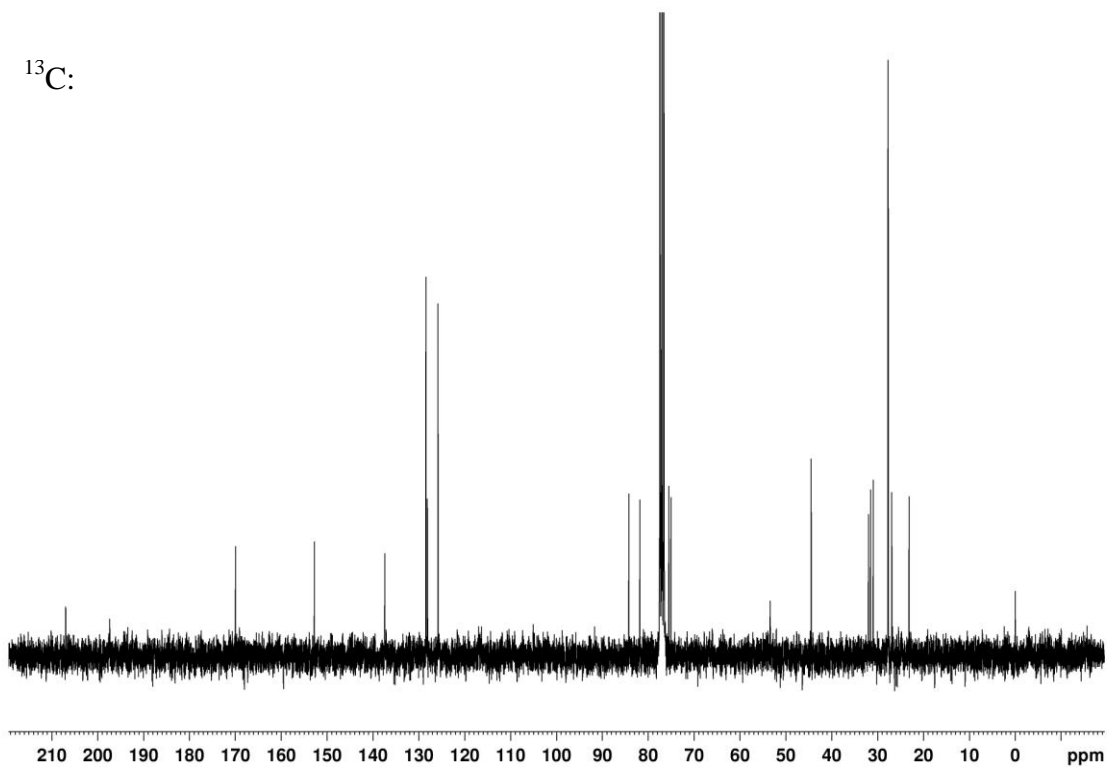



(*R*)-*tert*-Butyl-2-amino-2-((1*R*,3*S*)-3-hydroxycyclohexyl)-2-phenylacetate

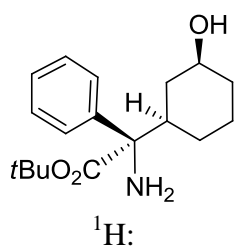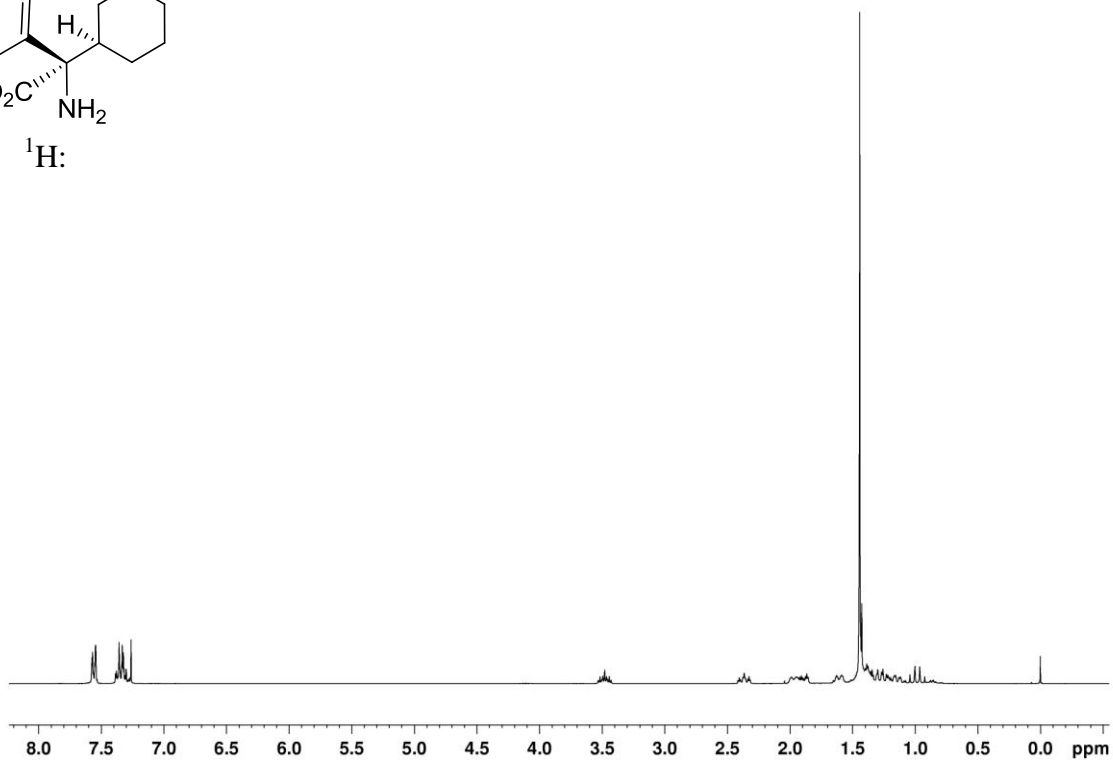

$^{13}\text{C}$ :

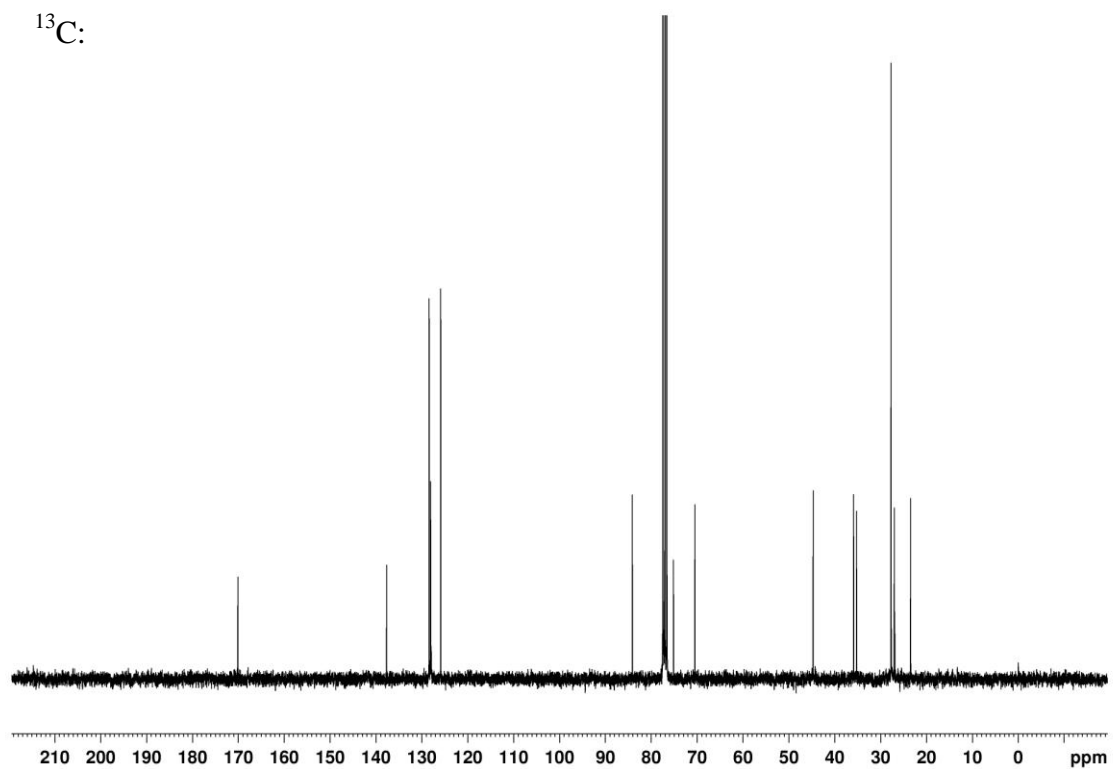

(*S*)-*tert*-Butyl-2-cyano-2-((1*R*,3*S*)-3-methoxycyclohexyl)-2-phenylacetate

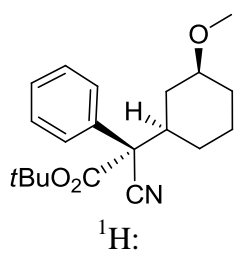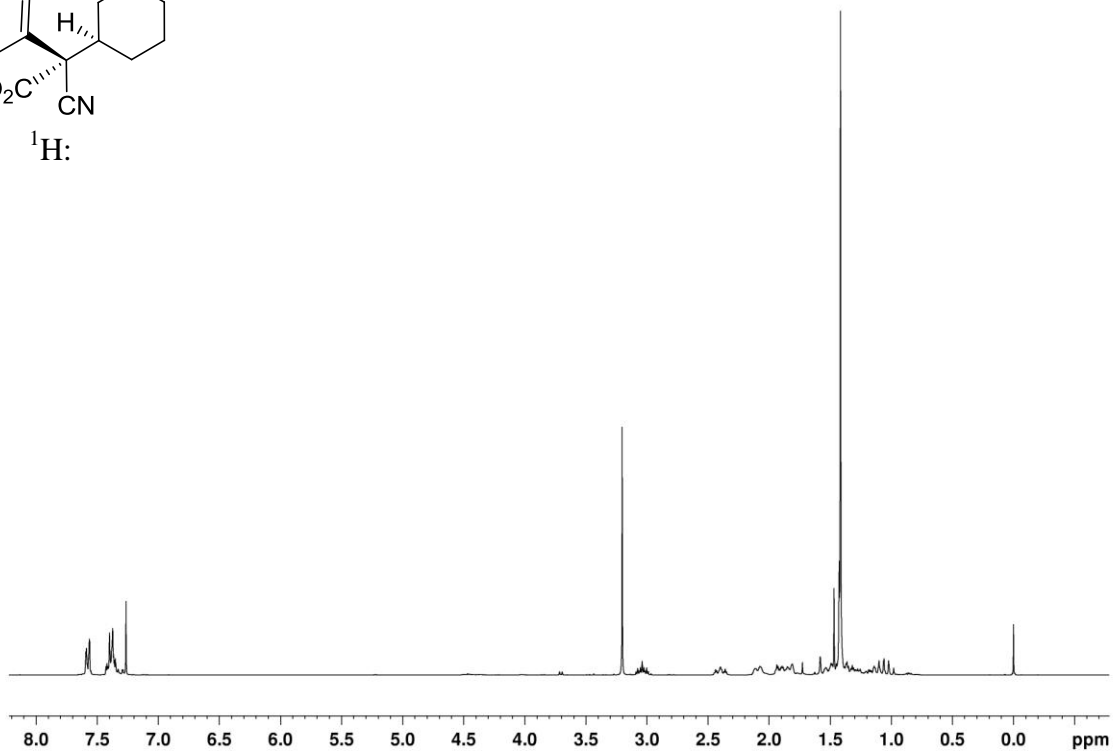

$^{13}\text{C}$ :

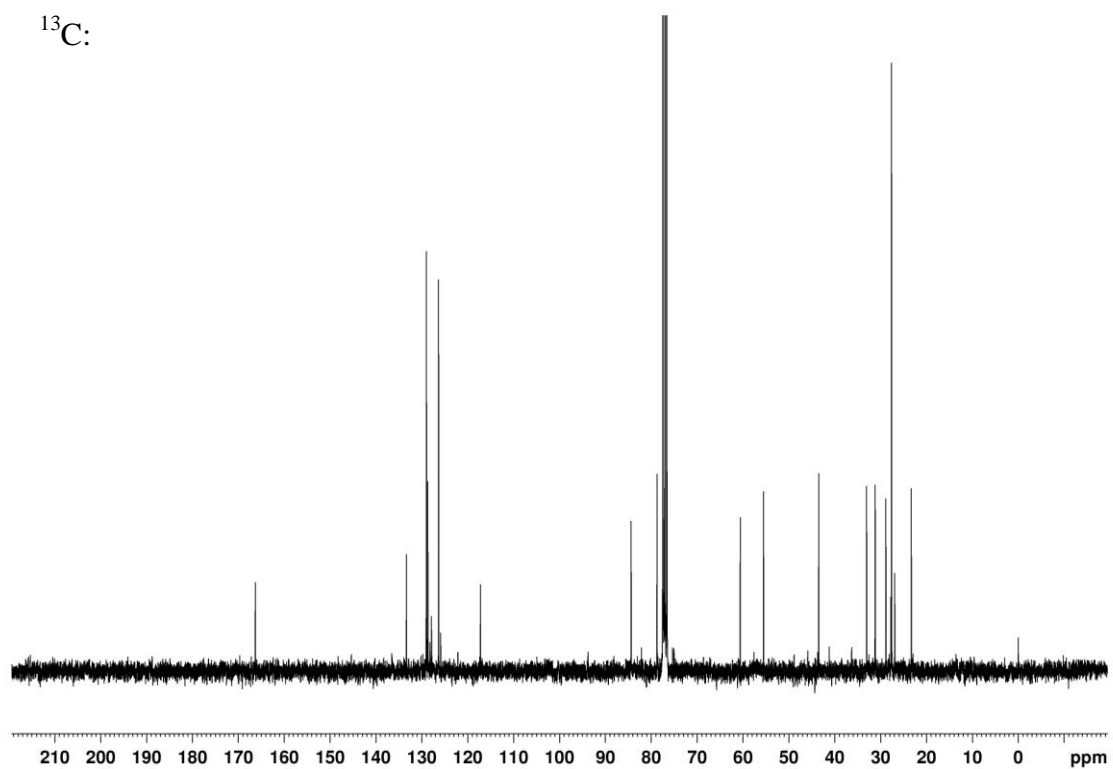

(*S*)-2-cyano-2-((1*R*,3*S*)-3-methoxycyclohexyl)-2-phenylacetamide ((*S,R,S*)-**9**)

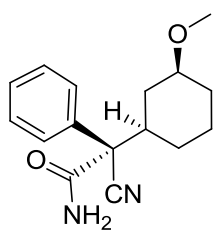

(*S,R,S*)-**9**

$^1\text{H}$ :

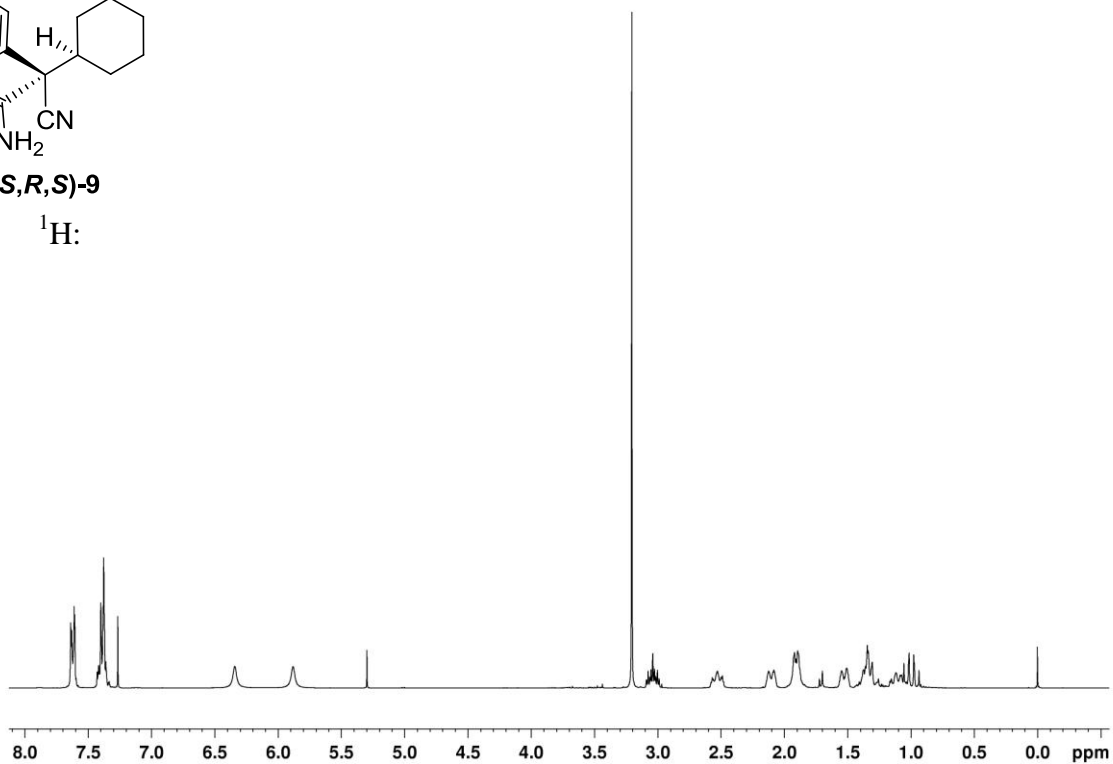

$^{13}\text{C}$ :

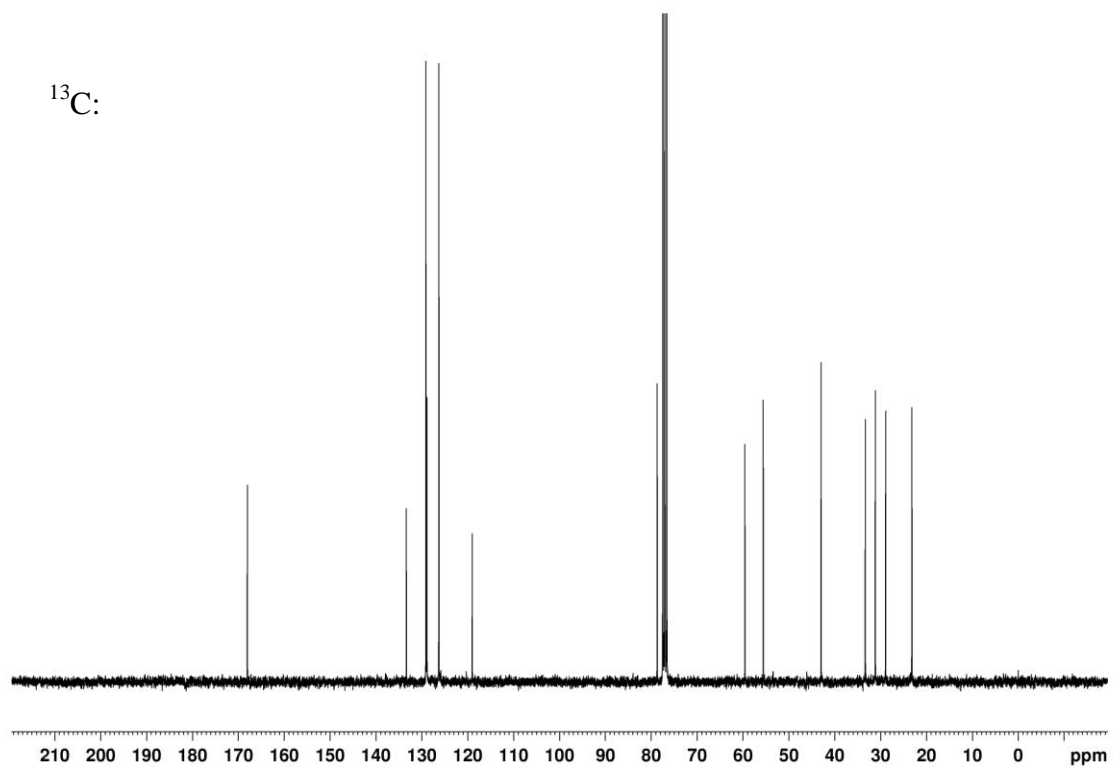

(*S*)-5-((*1R,3S*)-3-methoxycyclohexyl)-5-phenylimidazolidine-2,4-dione ((*S,R,S*)-**10**)

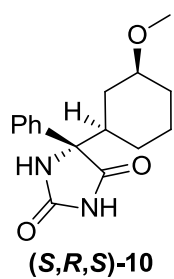

$^1\text{H}$ :

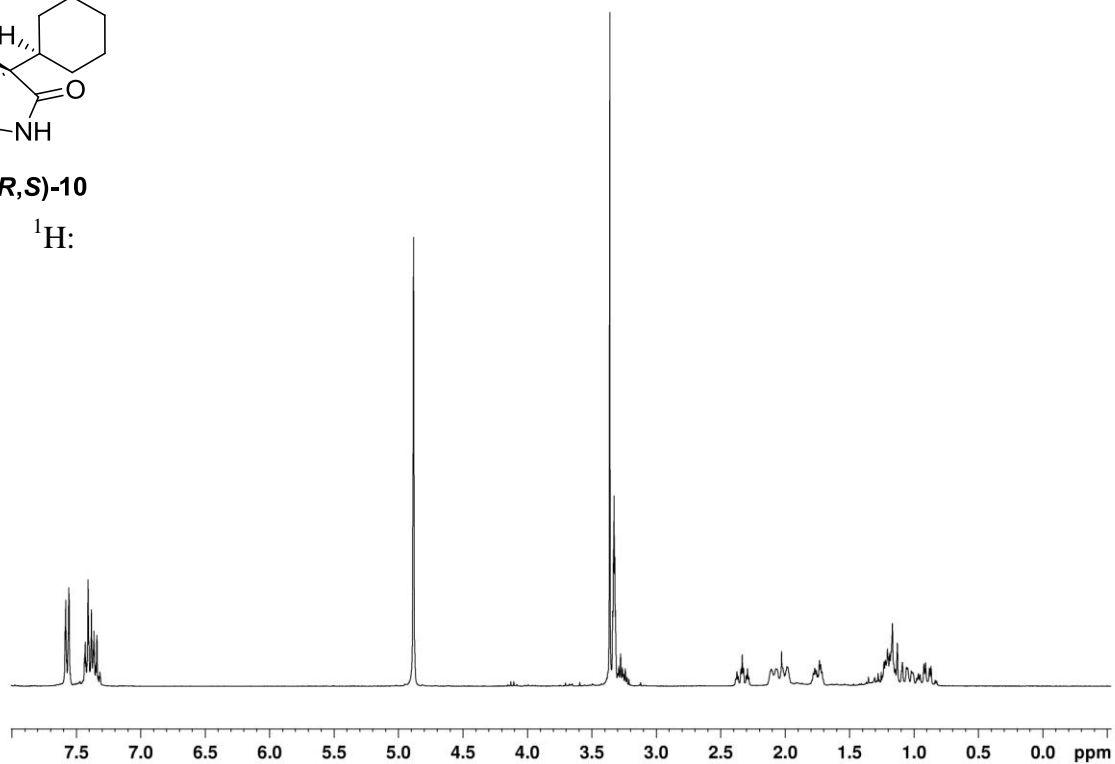

$^{13}\text{C}$ :

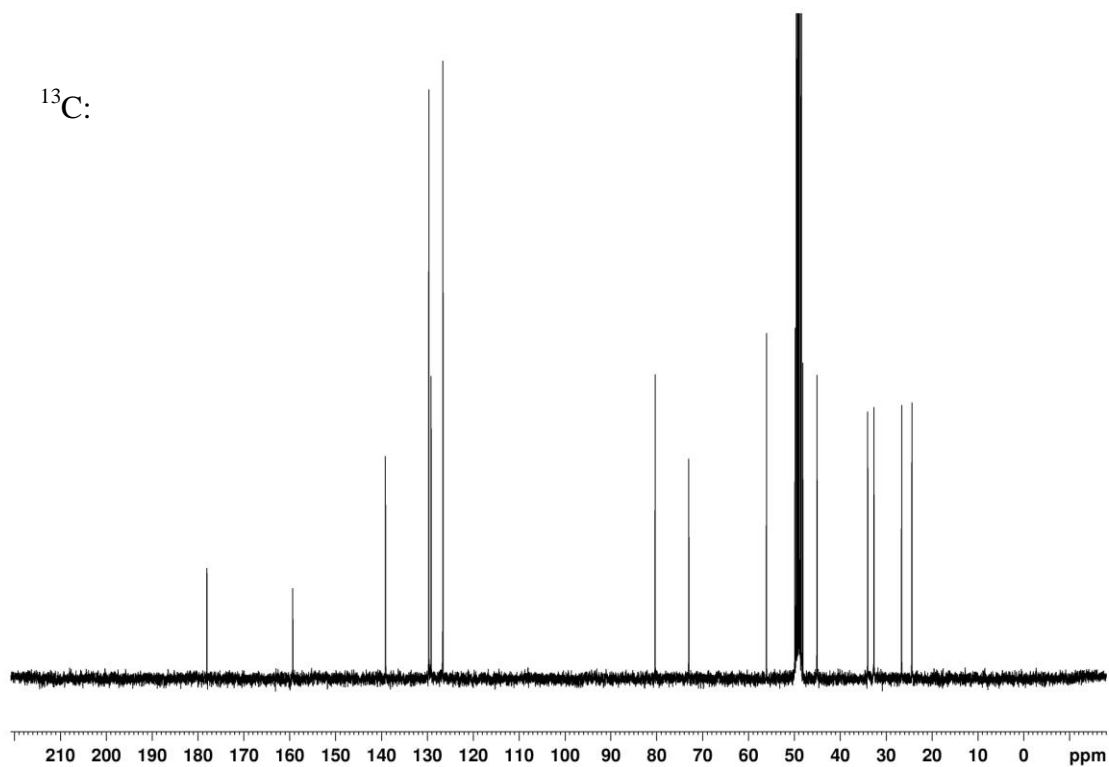

*tert*-Butyl-2-cyano-2-(4-oxocyclohexyl)-2-phenylacetate (**3aa\***)

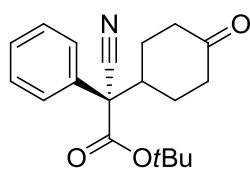

**3aa\***

$^1\text{H}$ :

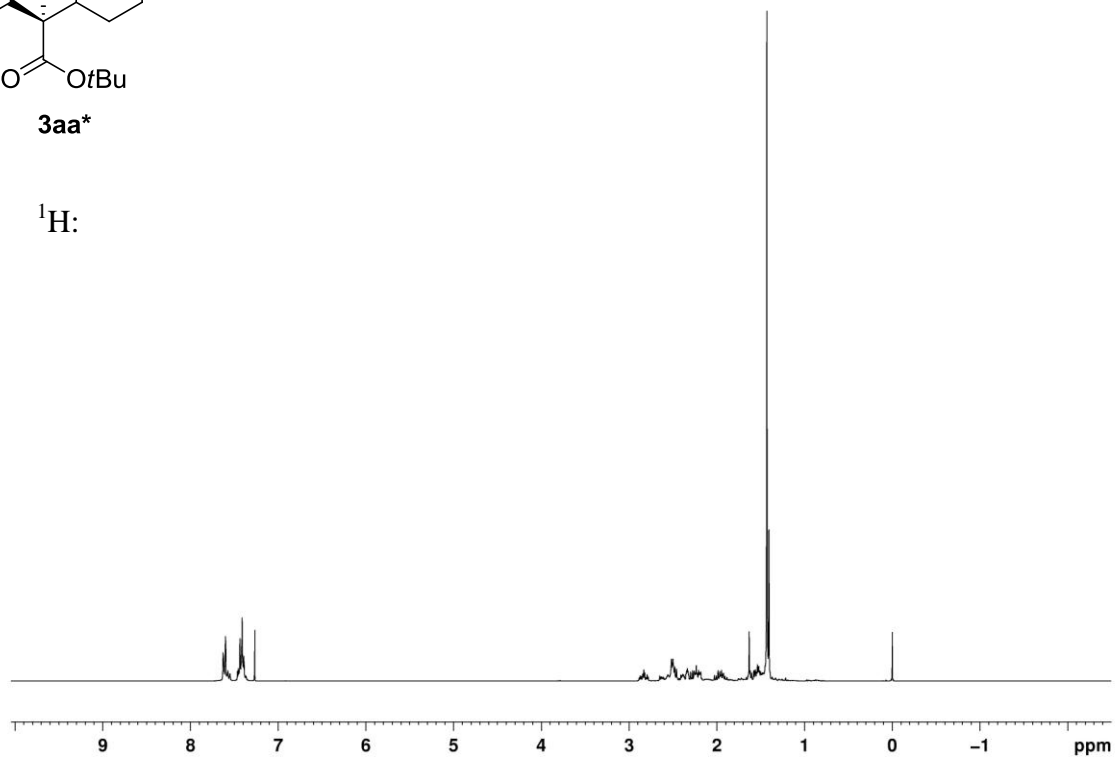

$^{13}\text{C}$ :

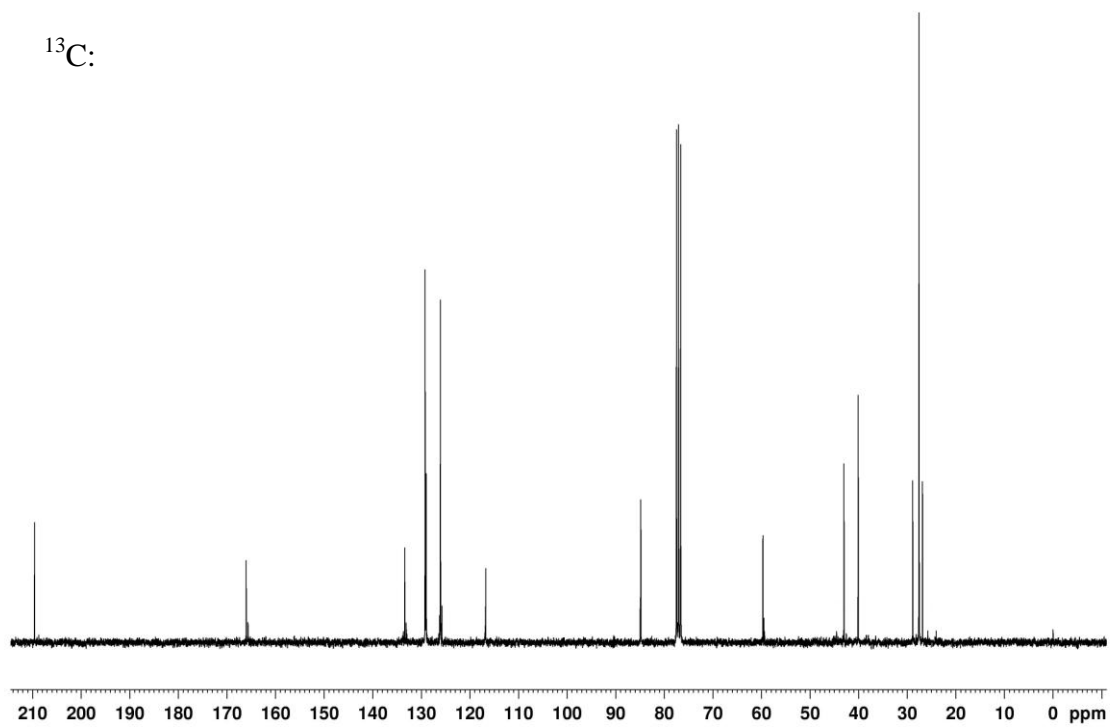

## HPLC Data

*tert*-Butyl-2-cyano-2-(3-oxocyclohexyl)-2-phenylacetate (**3aa**)

Area % Report : C:\EZChrom Elite\Enterprise\Projects\Simon Eitel\Data\MA new\10-MA340  
Aa\_ODH\_SE-99-1-210nm-60min-0.9flow.met.dat

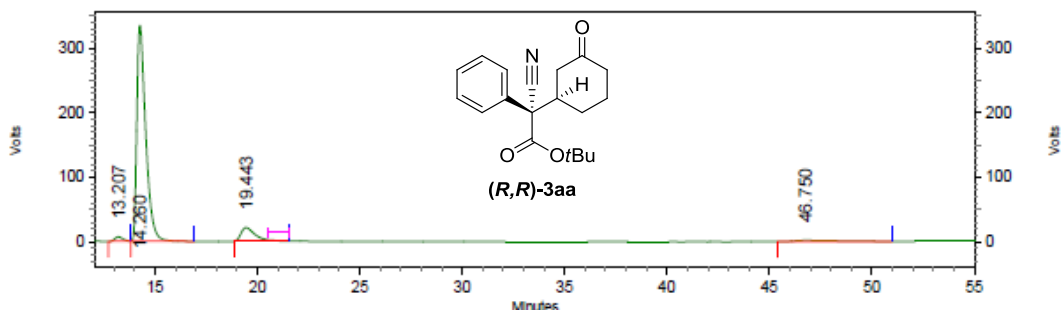

### UV Results

| Retention Time | Area     | Area % |
|----------------|----------|--------|
| 13.207         | 726061   | 1.57   |
| 14.260         | 40185821 | 87.02  |
| 19.443         | 4128717  | 8.94   |
| 46.750         | 1139298  | 2.47   |

Area % Report : C:\EZChrom Elite\Enterprise\Projects\Simon Eitel\Data\10-MA250G

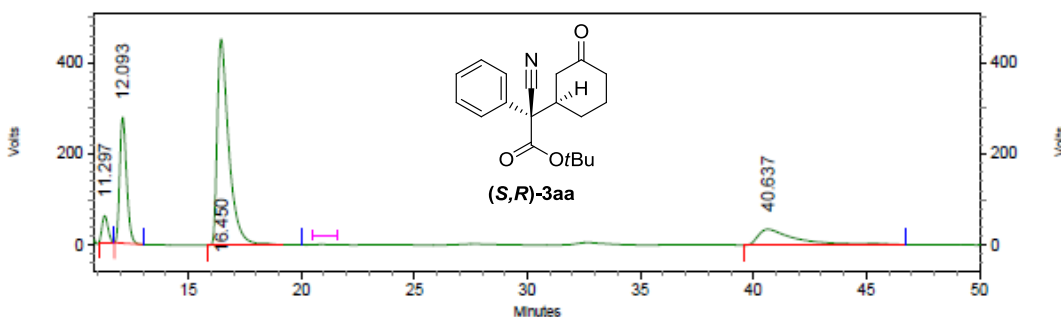

### UV Results

| Retention Time | Area     | Area % |
|----------------|----------|--------|
| 11.297         | 4157533  | 3.82   |
| 12.093         | 23379420 | 21.46  |
| 16.450         | 64754864 | 59.43  |
| 40.637         | 16676353 | 15.30  |

Area % Report : C:\EZChrom Elite\Enterprise\Projects\Simon Eitel\Data\MA new\SJM206

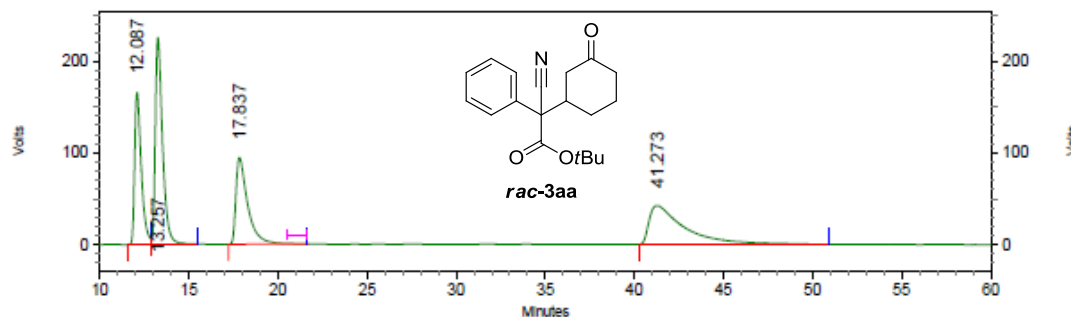

### UV Results

| Retention Time | Area     | Area % |
|----------------|----------|--------|
| 12.087         | 17283912 | 20.78  |
| 13.257         | 25240655 | 30.35  |
| 17.837         | 17347341 | 20.86  |
| 41.273         | 23302480 | 28.02  |

*tert*-Butyl-2-cyano-2-(3-oxocyclohexyl)-2-(3-(trifluoromethyl)phenyl)acetate (**3ba**)

Area % Report : C:\EZChrom Elite\Enterprise\Projects\Simon Eitel\Data\Old data\SEM-104 A

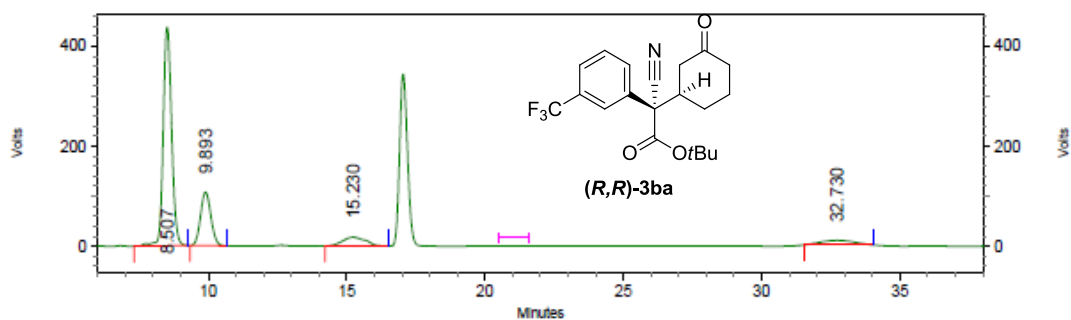

UV Results

| Retention Time | Area     | Area % |
|----------------|----------|--------|
| 8.507          | 36847344 | 66.91  |
| 9.893          | 11150871 | 20.25  |
| 15.230         | 4070129  | 7.39   |
| 32.730         | 2999234  | 5.45   |

Area % Report : C:\EZChrom Elite\Enterprise\Projects\Simon Eitel\Data\10-MA089 Da

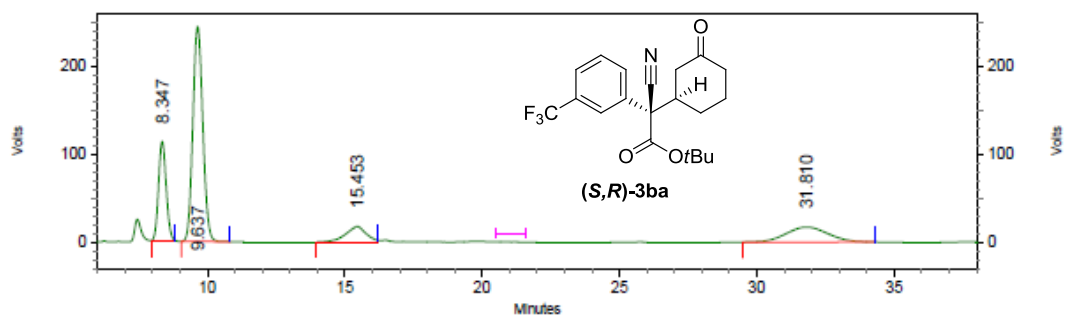

UV Results

| Retention Time | Area     | Area % |
|----------------|----------|--------|
| 8.347          | 8750398  | 19.77  |
| 9.637          | 24618114 | 55.62  |
| 15.453         | 3613252  | 8.16   |
| 31.810         | 7277465  | 16.44  |

Area % Report : C:\EZChrom Elite\Enterprise\Projects\Simon Eitel\Data\MA new\SEM-025rac

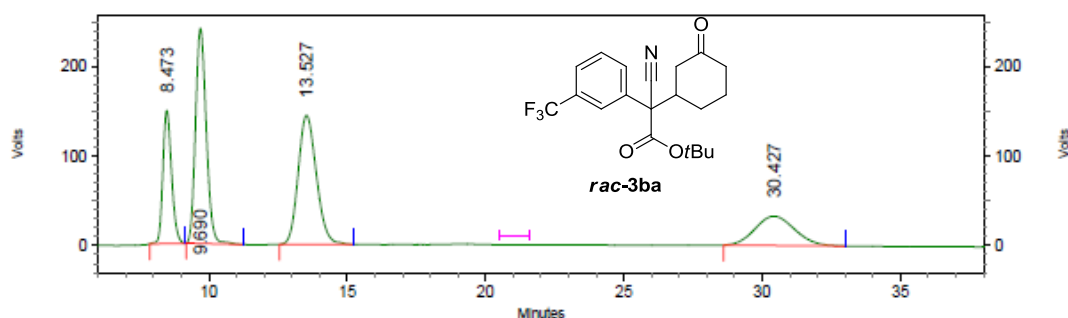

UV Results

| Retention Time | Area     | Area % |
|----------------|----------|--------|
| 8.473          | 13016406 | 16.56  |
| 9.690          | 26002480 | 33.09  |
| 13.527         | 26471342 | 33.69  |
| 30.427         | 13093085 | 16.66  |

*tert*-Butyl-2-cyano-2-(3-bromophenyl)-2-(3-oxocyclohexyl)acetate (**3ca**)

Area % Report : C:\EZChrom Elite\Enterprise\Projects\Simon Eitel\Data\Old data\SEM-105

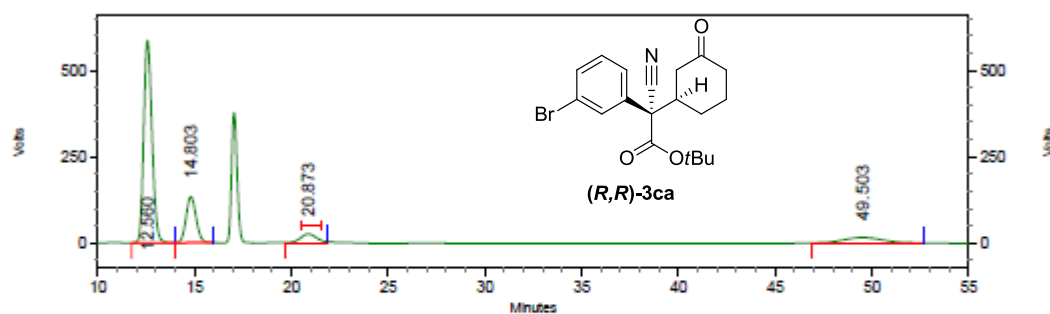

UV Results

| Retention Time | Area     | Area % |
|----------------|----------|--------|
| 12.560         | 69655224 | 67.39  |
| 14.803         | 19295171 | 18.67  |
| 20.873         | 5790051  | 5.60   |
| 49.503         | 8619143  | 8.34   |

Area % Report : C:\EZChrom Elite\Enterprise\Projects\Simon Eitel\Data\Old data\SEM-023  
RAC+SM\_ASH\_se-97-3-210nm-60min-1flow.met.dat

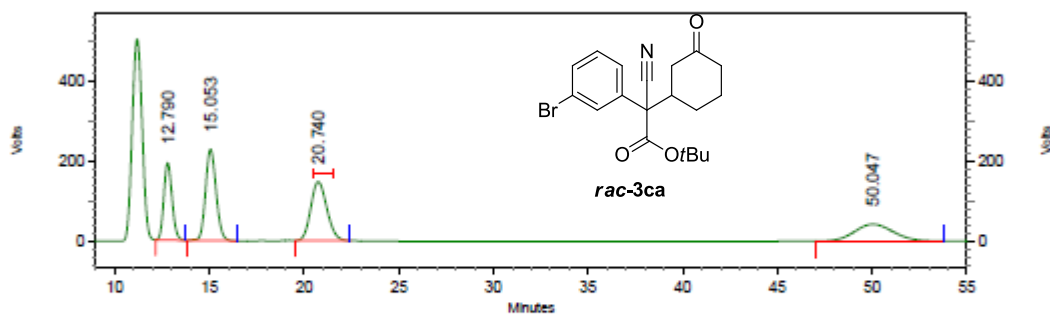

UV Results

| Retention Time | Area     | Area % |
|----------------|----------|--------|
| 12.790         | 23507608 | 19.95  |
| 15.053         | 35612271 | 30.22  |
| 20.740         | 34764548 | 29.50  |
| 50.047         | 23954359 | 20.33  |



*tert*-Butyl-2-cyano-2-(3-chlorophenyl)-2-(3-oxocyclohexyl)acetate (**3da**)

Area % Report : C:\EZChrom Elite\Enterprise\Projects\Simon Eitel\Data\10-MA032 Ib

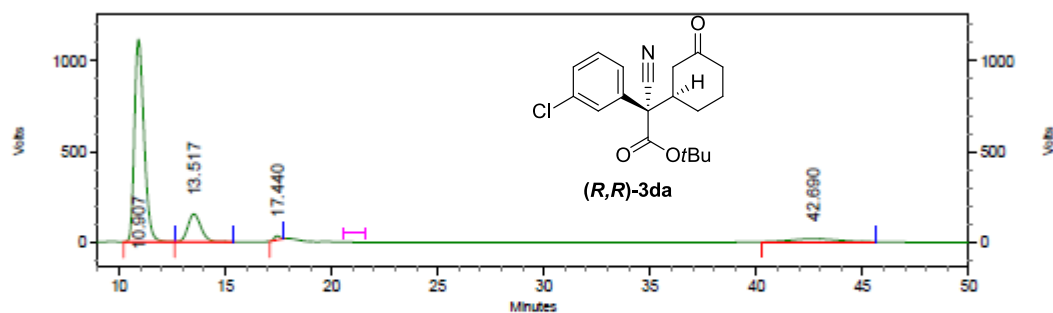

UV Results

| Retention Time | Area      | Area % |
|----------------|-----------|--------|
| 10.907         | 140617502 | 78.84  |
| 13.517         | 26303583  | 14.75  |
| 17.440         | 1686685   | 0.95   |
| 42.690         | 9751001   | 5.47   |

Area % Report : C:\EZChrom Elite\Enterprise\Projects\Simon Eitel\Data\10-MA101  
 Aa\_ASH\_SE-97-3-210nm-60min-1flow.met.dat

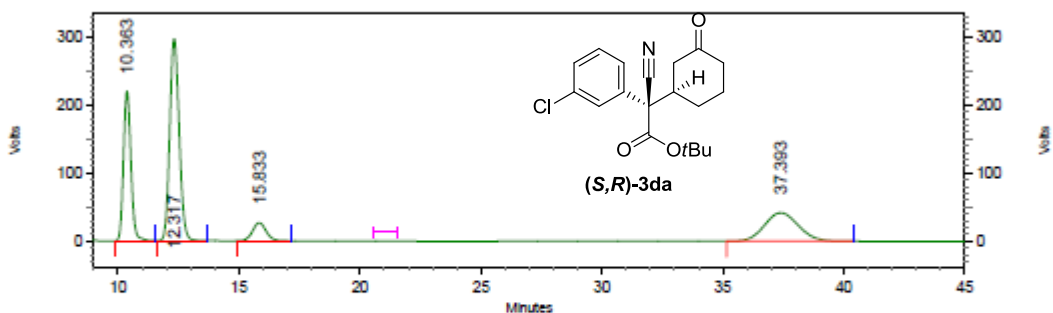

UV Results

| Retention Time | Area     | Area % |
|----------------|----------|--------|
| 10.363         | 18819896 | 26.34  |
| 12.317         | 32137313 | 44.99  |
| 15.833         | 4138518  | 5.79   |
| 37.393         | 16341069 | 22.87  |

Area % Report : C:\EZChrom Elite\Enterprise\Projects\Simon Eitel\Data\Old data\SEM-024  
 RAC+SM\_ASH\_se-97-3-210nm-60min-1flow.met.dat

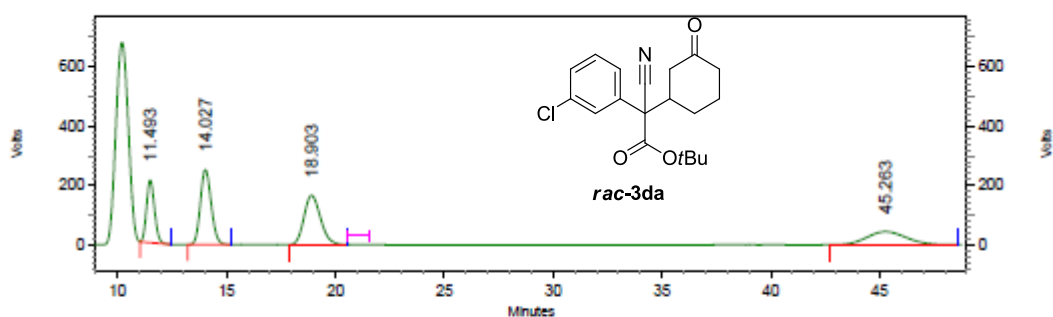

UV Results

| Retention Time | Area     | Area % |
|----------------|----------|--------|
| 11.493         | 21521607 | 18.91  |
| 14.027         | 34919720 | 30.68  |
| 18.903         | 34930219 | 30.69  |
| 45.263         | 22444671 | 19.72  |

*tert*-Butyl-2-cyano-2-(3-methoxyphenyl)-2-(3-oxocyclohexyl)-acetate (**3ea**)

Area % Report : C:\EZChrom Elite\Enterprise\Projects\Simon Eitel\Data\10-MA032 Ea

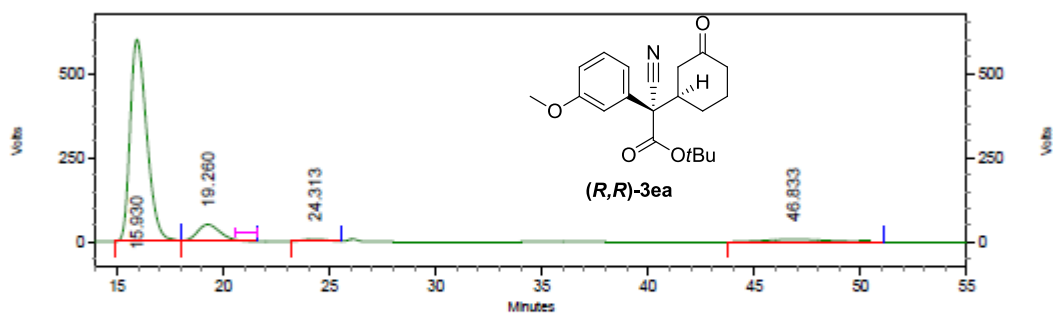

UV Results

| Retention Time | Area      | Area % |
|----------------|-----------|--------|
| 15.930         | 130828820 | 85.57  |
| 19.260         | 15628366  | 10.22  |
| 24.313         | 1743396   | 1.14   |
| 46.833         | 4685413   | 3.06   |

Area % Report : C:\EZChrom Elite\Enterprise\Projects\Simon Eitel\Data\MA new\10-MA089Cb\_ASH\_SE-97-3-210nm-60min-1flow.met.dat

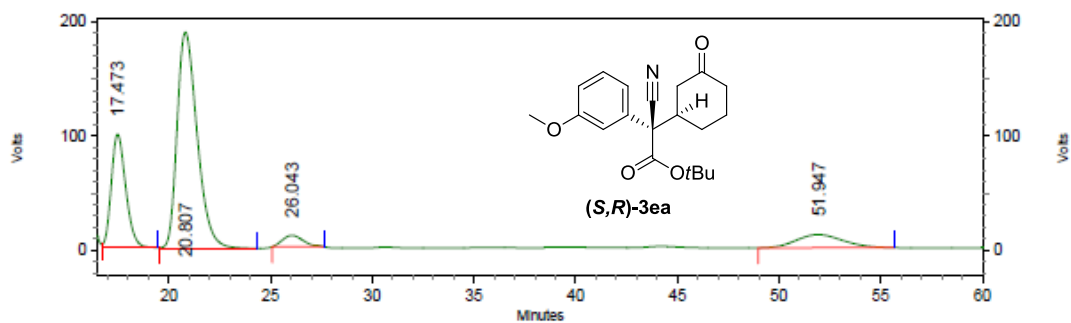

UV Results

| Retention Time | Area     | Area % |
|----------------|----------|--------|
| 17.473         | 19643030 | 24.03  |
| 20.807         | 51860715 | 63.45  |
| 26.043         | 2860361  | 3.50   |
| 51.947         | 7365790  | 9.01   |

Area % Report : C:\EZChrom Elite\Enterprise\Projects\Simon Eitel\Data\MA new\SEM-026rac

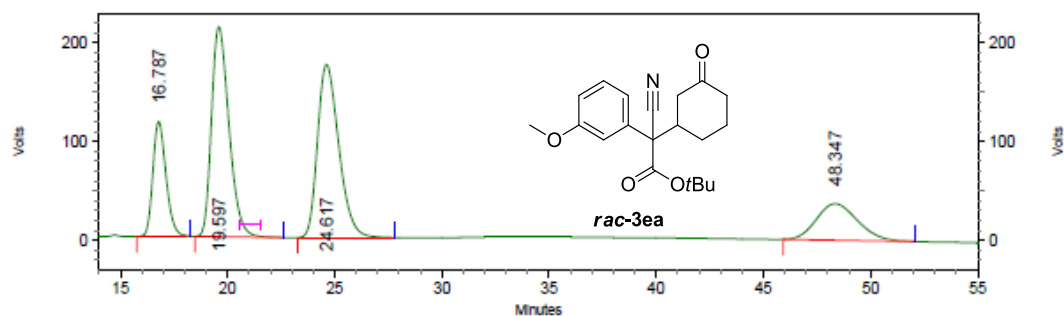

UV Results

| Retention Time | Area     | Area % |
|----------------|----------|--------|
| 16.787         | 19765639 | 14.54  |
| 19.597         | 48133867 | 35.41  |
| 24.617         | 48264749 | 35.51  |
| 48.347         | 19767238 | 14.54  |

*tert*-Butyl-2-cyano-2-(3-oxocyclohexyl)-2-(*m*-tolyl)-acetate (**3fa**)

Area % Report : C:\EZChrom Elite\Enterprise\Projects\Simon Eitel\Data\10-MA032 Ga

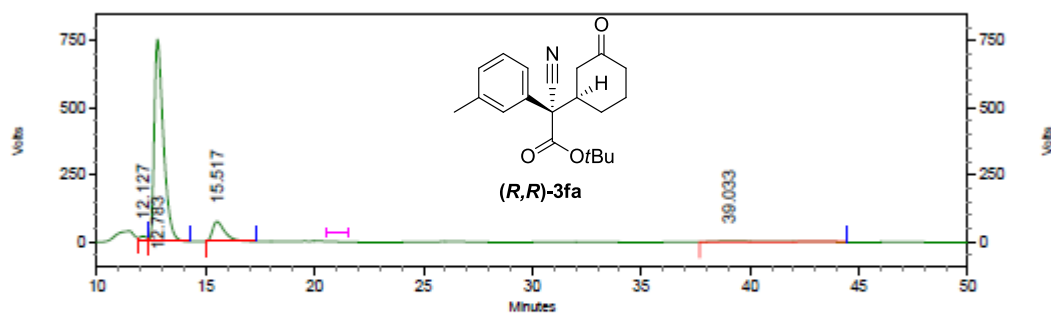

UV Results

| Retention Time | Area     | Area % |
|----------------|----------|--------|
| 12.127         | 1908330  | 1.84   |
| 12.783         | 87620443 | 84.70  |
| 15.517         | 11825657 | 11.43  |
| 39.033         | 2090639  | 2.02   |

Area % Report : C:\EZChrom Elite\Enterprise\Projects\Simon Eitel\Data\10-MA089 Bb

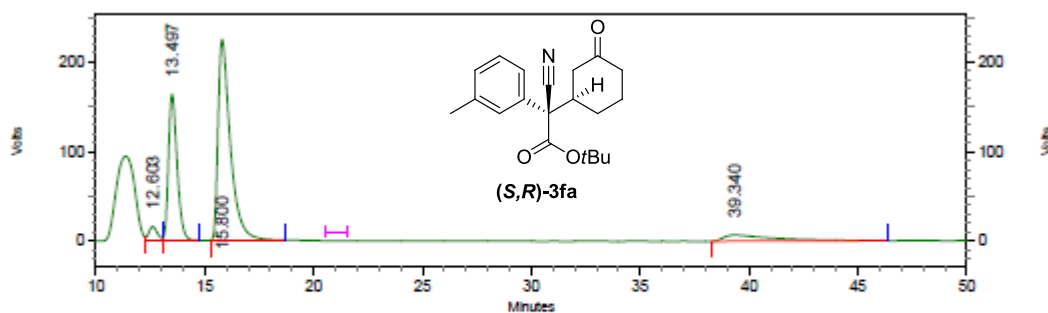

UV Results

| Retention Time | Area     | Area % |
|----------------|----------|--------|
| 12.603         | 1643982  | 2.77   |
| 13.497         | 17972474 | 30.27  |
| 15.800         | 35241420 | 59.36  |
| 39.340         | 4506984  | 7.59   |

Area % Report : C:\EZChrom Elite\Enterprise\Projects\Simon Eitel\Data\MA new\SEM-031rac-4

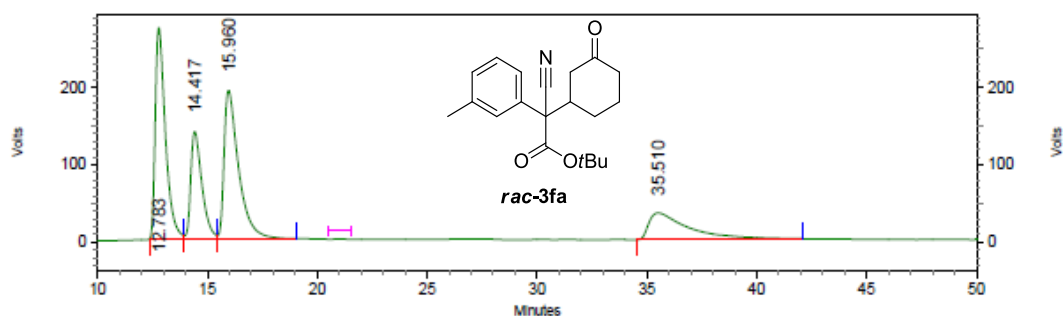

UV Results

| Retention Time | Area     | Area % |
|----------------|----------|--------|
| 12.783         | 34928714 | 32.32  |
| 14.417         | 19500245 | 18.04  |
| 15.960         | 35290663 | 32.65  |
| 35.510         | 18355607 | 16.98  |

*tert*-Butyl-2-cyano-2-(4-fluorophenyl)-2-(3-oxocyclohexyl)-acetate (**3ga**)

Area % Report : C:\EZChrom Elite\Enterprise\Projects\Simon Eitel\Data\10-MA032 Fb-2

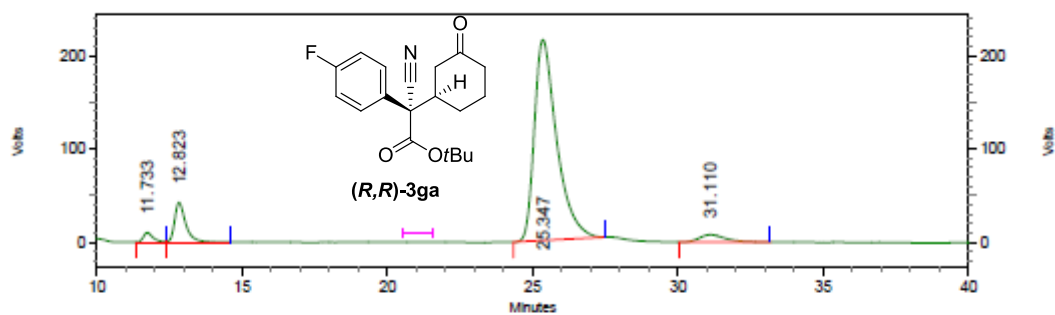

UV Results

| Retention Time | Area     | Area % |
|----------------|----------|--------|
| 11.733         | 941654   | 1.76   |
| 12.823         | 4496001  | 8.40   |
| 25.347         | 46127983 | 86.18  |
| 31.110         | 1957638  | 3.66   |

Area % Report : C:\EZChrom Elite\Enterprise\Projects\Simon Eitel\Data\10-MA089 Fa

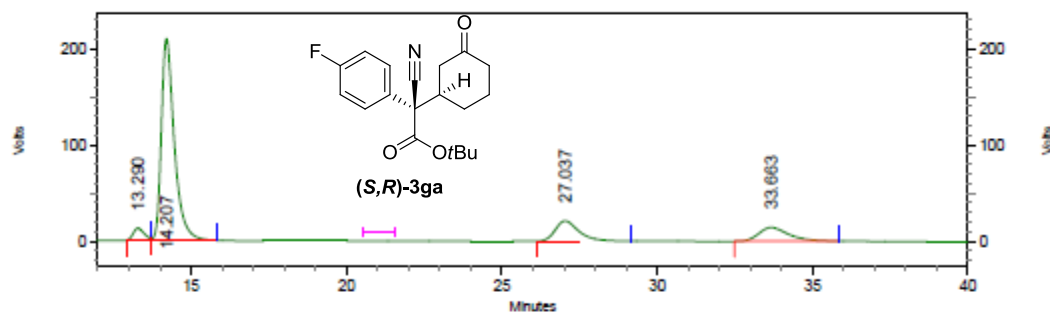

UV Results

| Retention Time | Area     | Area % |
|----------------|----------|--------|
| 13.290         | 1233889  | 3.67   |
| 14.207         | 24133944 | 71.79  |
| 27.037         | 4408955  | 13.11  |
| 33.663         | 3841118  | 11.43  |

Area % Report : C:\EZChrom Elite\Enterprise\Projects\Simon Eitel\Data\Old data\SEM-020  
 RAC\_ADH\_sj-99-1-210nm-60min-1.2flow.met.dat

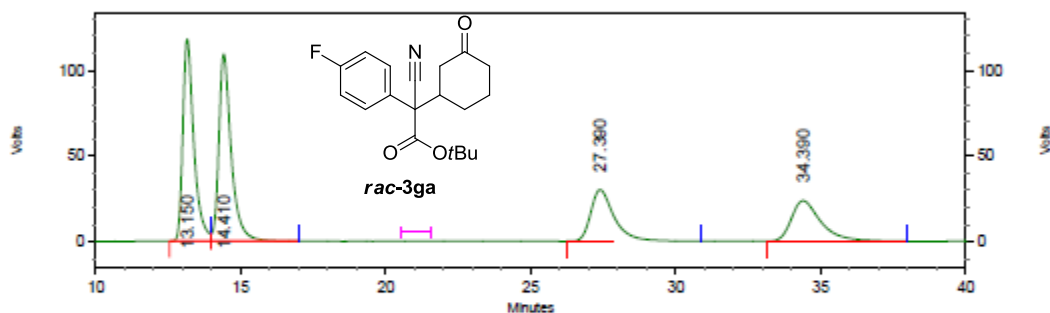

UV Results

| Retention Time | Area     | Area % |
|----------------|----------|--------|
| 13.150         | 12452127 | 31.92  |
| 14.410         | 12995122 | 33.32  |
| 27.390         | 6845602  | 17.55  |
| 34.390         | 6713697  | 17.21  |

*tert*-Butyl-2-cyano-2-(4-chlorophenyl)-2-(3-oxocyclohexyl)-acetate (**3ha**)

Area % Report : C:\EZChrom Elite\Enterprise\Projects\Simon Eitel\Data\MA new\10-MA340 Da2

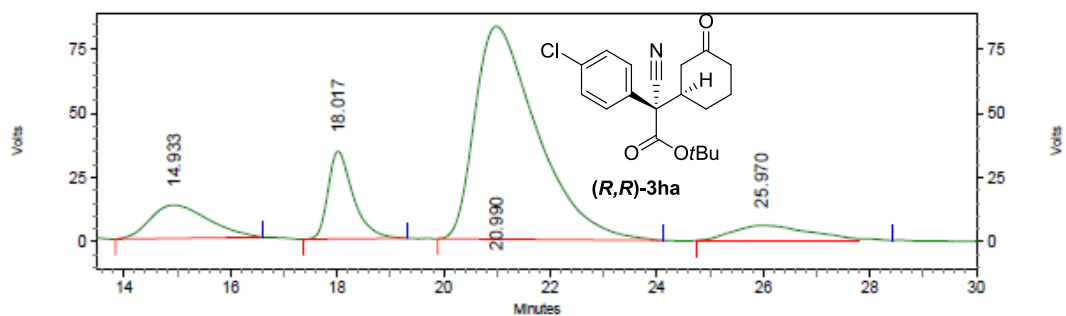

UV Results

| Retention Time | Area     | Area % |
|----------------|----------|--------|
| 14.933         | 3947108  | 10.41  |
| 18.017         | 4499584  | 11.87  |
| 20.990         | 27063467 | 71.38  |
| 25.970         | 2401914  | 6.34   |

Area % Report : C:\EZChrom Elite\Enterprise\Projects\Simon Eitel\Data\MA new\10-MA094 Aa2

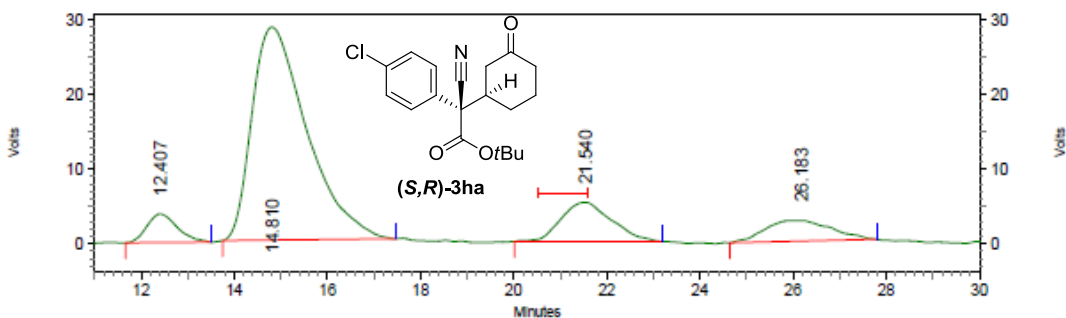

UV Results

| Retention Time | Area    | Area % |
|----------------|---------|--------|
| 12.407         | 696004  | 5.46   |
| 14.810         | 9378253 | 73.55  |
| 21.540         | 1580066 | 12.39  |
| 26.183         | 1096945 | 8.60   |

Area % Report : C:\EZChrom Elite\Enterprise\Projects\Simon Eitel\Data\MA new\SEM-016rac5

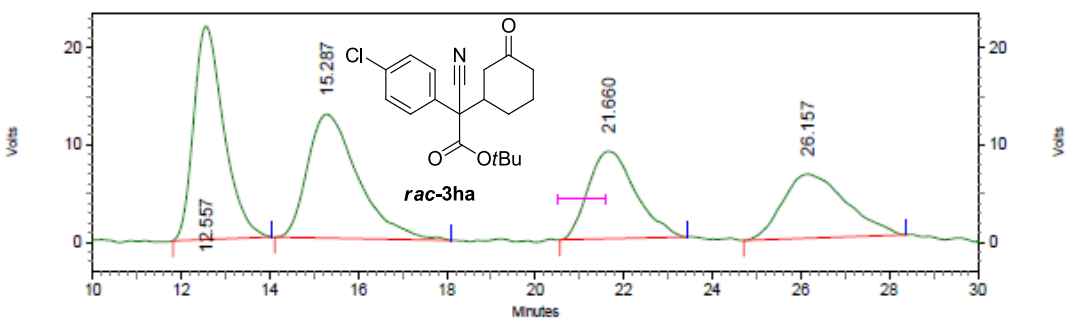

UV Results

| Retention Time | Area    | Area % |
|----------------|---------|--------|
| 12.557         | 4167989 | 30.78  |
| 15.287         | 4054514 | 29.95  |
| 21.660         | 2675411 | 19.76  |
| 26.157         | 2641308 | 19.51  |

*tert*-Butyl-2-cyano-2-(4-bromophenyl)-2-(3-oxocyclohexyl)-acetate (**3ia**)

Area % Report : C:\EZChrom Elite\Enterprise\Projects\Simon Eitel\Data\10-MA032 Ca

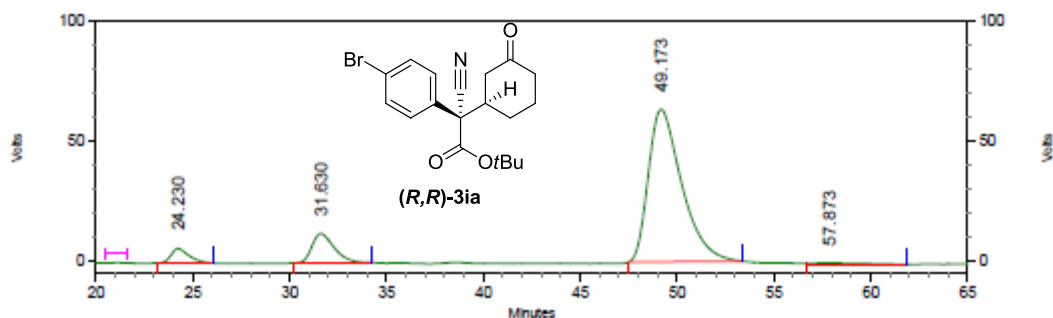

UV Results

| Retention Time | Area     | Area % |
|----------------|----------|--------|
| 24.230         | 1538677  | 4.24   |
| 31.630         | 3977853  | 10.97  |
| 49.173         | 30334686 | 83.69  |
| 57.873         | 397105   | 1.10   |

Area % Report : C:\EZChrom Elite\Enterprise\Projects\Simon Eitel\Data\10-MA101  
Ba\_ADH\_SE-99.5-0.5-210nm-70min-1.2flow.met.dat

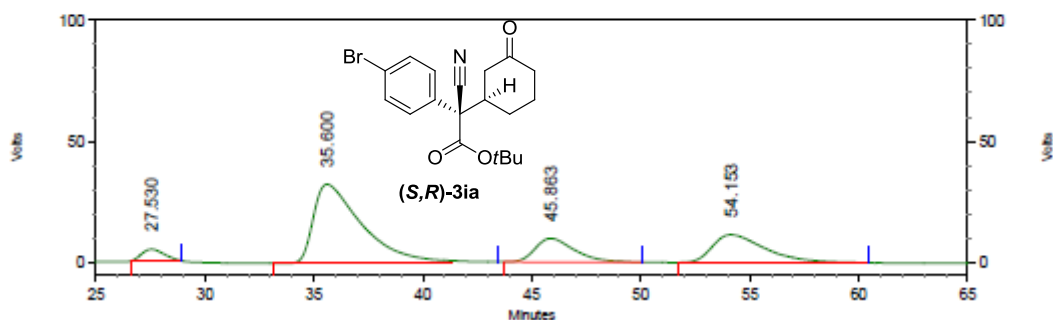

UV Results

| Retention Time | Area     | Area % |
|----------------|----------|--------|
| 27.530         | 1400488  | 4.00   |
| 35.600         | 20869465 | 59.63  |
| 45.863         | 4918347  | 14.05  |
| 54.153         | 7811650  | 22.32  |

Area % Report : C:\EZChrom Elite\Enterprise\Projects\Simon Eitel\Data\Old data\SEM-041 RAC +  
SM\_ADH\_SE-99.5-0.5-210nm-70min-1.2flow.met.dat

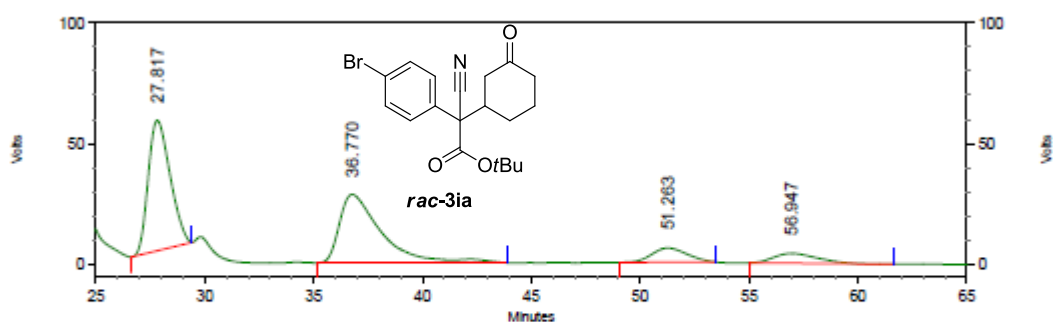

UV Results

| Retention Time | Area     | Area % |
|----------------|----------|--------|
| 27.817         | 15104786 | 42.96  |
| 36.770         | 15172451 | 43.15  |
| 51.263         | 2628153  | 7.47   |
| 56.947         | 2256252  | 6.42   |

*tert*-Butyl-2-cyano-2-(3-oxocyclohexyl)-2-(*p*-tolyl)-acetate (**3ja**)

Area % Report : C:\EZChrom Elite\Enterprise\Projects\Simon Eitel\Data\MA new\10-MA340 Ca

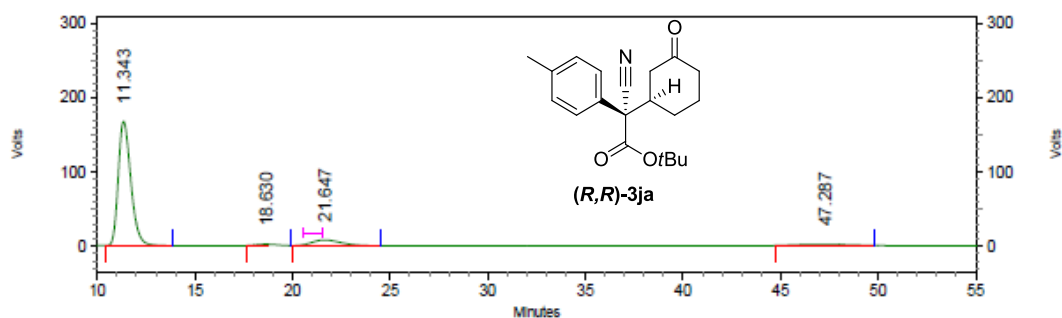

UV Results

| Retention Time | Area     | Area % |
|----------------|----------|--------|
| 11.343         | 30143064 | 86.22  |
| 18.630         | 528608   | 1.51   |
| 21.647         | 3288304  | 9.41   |
| 47.287         | 999844   | 2.86   |

Area % Report : C:\EZChrom Elite\Enterprise\Projects\Simon Eitel\Data\MA new\10-MA089 Ab-2

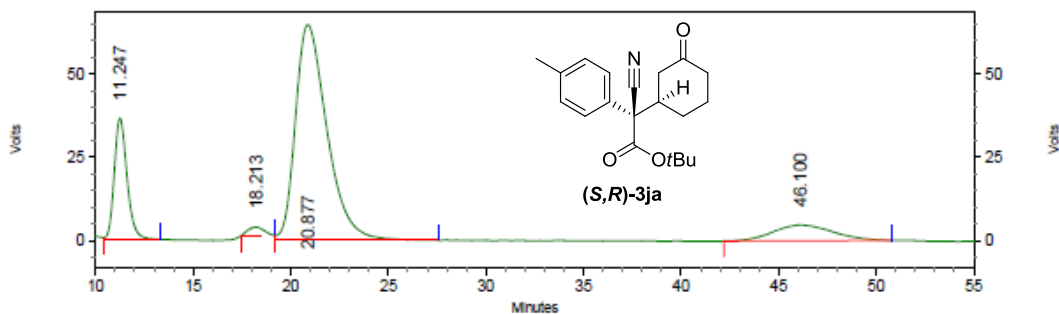

UV Results

| Retention Time | Area     | Area % |
|----------------|----------|--------|
| 11.247         | 6647742  | 16.46  |
| 18.213         | 165485   | 0.41   |
| 20.877         | 29117252 | 72.11  |
| 46.100         | 4044795  | 10.02  |

Area % Report : C:\EZChrom Elite\Enterprise\Projects\Simon Eitel\Data\MA new\SEM-021rac-3

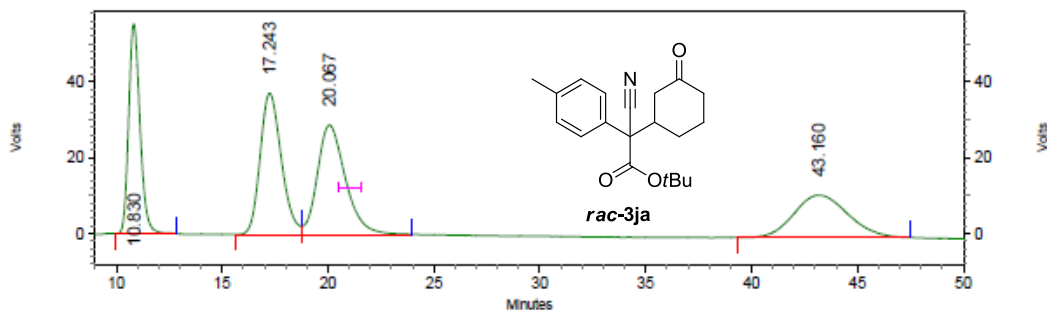

UV Results

| Retention Time | Area     | Area % |
|----------------|----------|--------|
| 10.830         | 8254140  | 22.21  |
| 17.243         | 10369011 | 27.91  |
| 20.067         | 10601900 | 28.53  |
| 43.160         | 7932894  | 21.35  |

*tert*-Butyl-2-cyano-2-(2-fluorophenyl)-2-(3-oxocyclohexyl)-acetate (**3ka**)

Area % Report : C:\EZChrom Elite\Enterprise\Projects\Simon Eitel\Data\MA new\10-MA101Cb 14+15

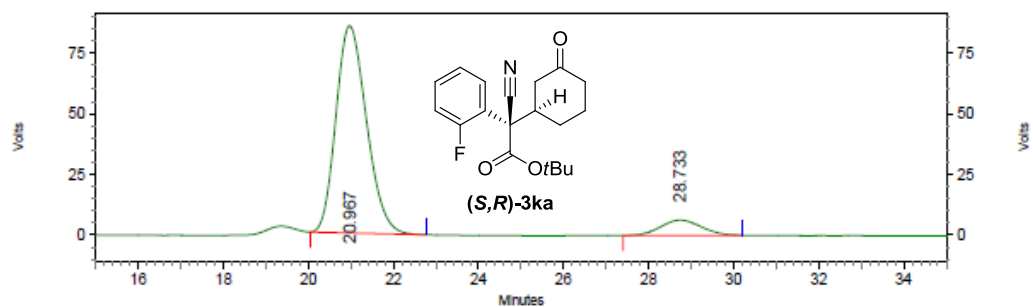

UV Results

| Retention Time | Area     | Area % |
|----------------|----------|--------|
| 20.967         | 17060841 | 91.05  |
| 28.733         | 1676204  | 8.95   |

Area % Report : C:\EZChrom Elite\Enterprise\Projects\Simon Eitel\Data\MA new\10-MA037rac Dial

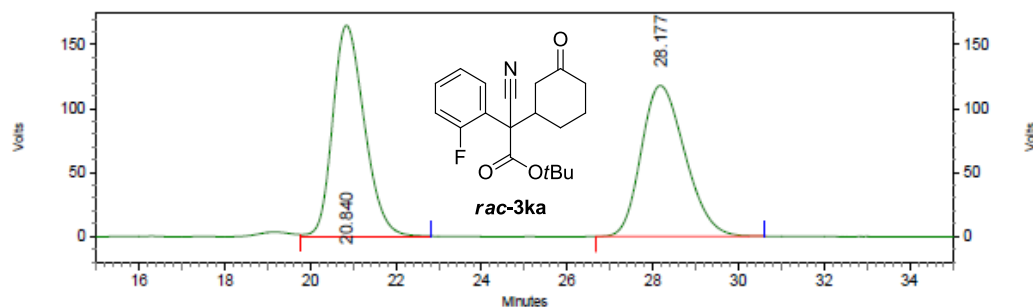

UV Results

| Retention Time | Area     | Area % |
|----------------|----------|--------|
| 20.840         | 33877370 | 50.17  |
| 28.177         | 33650867 | 49.83  |



*tert*-Butyl-2-cyano-2-(3-fluorophenyl)-2-(3-oxocyclohexyl)-acetate (**3la**)

Area % Report : C:\EZChrom Elite\Enterprise\Projects\Simon Eitel\Data\10-MA114  
A\_ASH\_SE-97-3-210nm-45min-1flow.met.dat

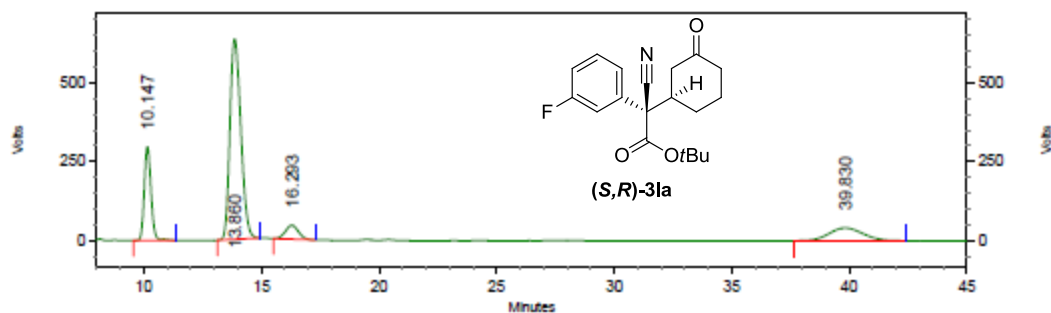

UV Results

| Retention Time | Area     | Area % |
|----------------|----------|--------|
| 10.147         | 23756126 | 18.41  |
| 13.860         | 82061104 | 63.60  |
| 16.293         | 6729763  | 5.22   |
| 39.830         | 16482979 | 12.77  |

Area % Report : C:\EZChrom Elite\Enterprise\Projects\Simon Eitel\Data\racemic products\10-MA115 rac  
dirty\_ASH\_SE-97-3-210nm-45min-1flow.met.dat

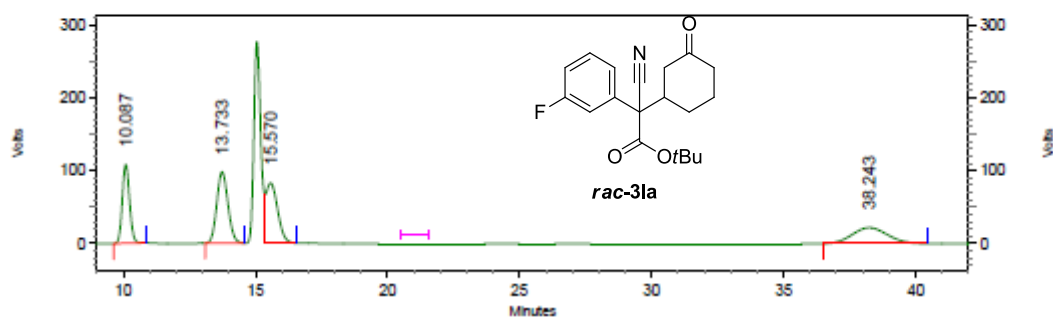

UV Results

| Retention Time | Area     | Area % |
|----------------|----------|--------|
| 10.087         | 8205686  | 21.66  |
| 13.733         | 11472096 | 30.28  |
| 15.570         | 10071839 | 26.58  |
| 38.243         | 8142506  | 21.49  |

*tert*-Butyl-2-cyano-2-(3-oxocyclopentyl)-2-phenylacetate (**3ab**)

Area % Report : C:\EZChrom Elite\Enterprise\Projects\Simon Eitel\Data\Old data\SEM-094 A

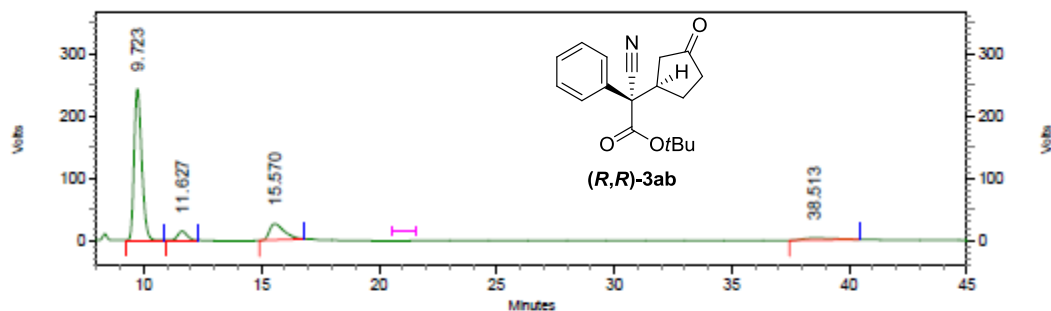

UV Results

| Retention Time | Area     | Area % |
|----------------|----------|--------|
| 9.723          | 21749926 | 74.95  |
| 11.627         | 1581847  | 5.45   |
| 15.570         | 4530841  | 15.61  |
| 38.513         | 1158345  | 3.99   |

Area % Report : C:\EZChrom Elite\Enterprise\Projects\Simon Eitel\Data\10-MA090 Cb

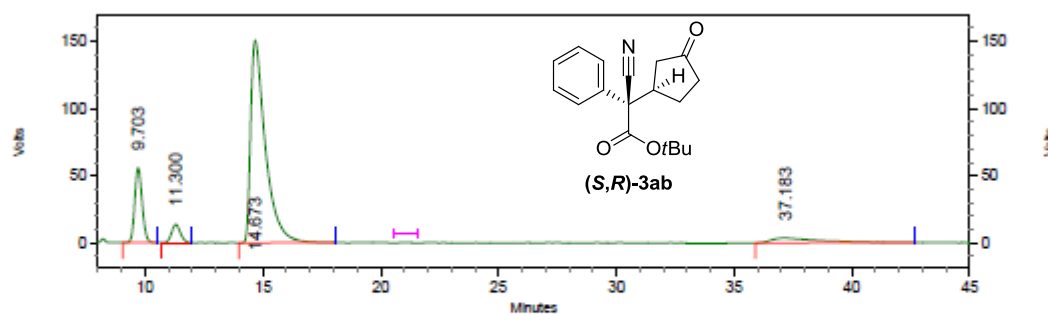

UV Results

| Retention Time | Area     | Area % |
|----------------|----------|--------|
| 9.703          | 4869768  | 14.10  |
| 11.300         | 1403817  | 4.07   |
| 14.673         | 26264605 | 76.07  |
| 37.183         | 1988279  | 5.76   |

Area % Report : C:\EZChrom Elite\Enterprise\Projects\Simon Eitel\Data\Old data\SEM-060  
 RAC\_ODH\_sj-99-1-210nm-60min-2ml.met.dat

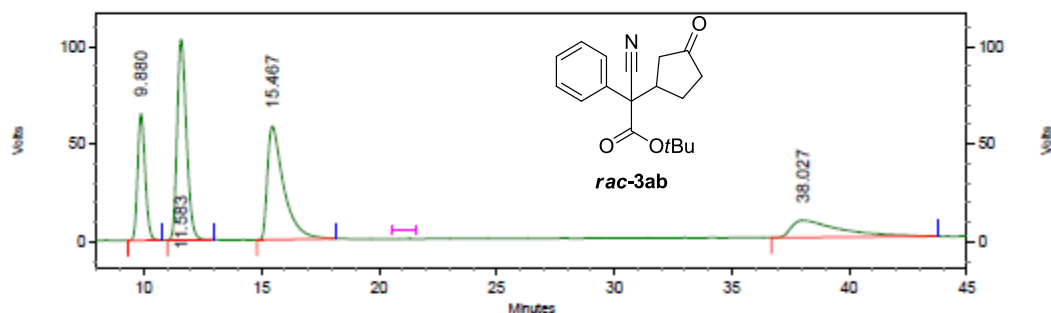

UV Results

| Retention Time | Area     | Area % |
|----------------|----------|--------|
| 9.880          | 5763796  | 17.27  |
| 11.583         | 11358772 | 34.04  |
| 15.467         | 11214808 | 33.61  |
| 38.027         | 5032845  | 15.08  |

*tert*-Butyl-2-cyano-2-(3-oxocycloheptyl)-2-phenylacetate (**3ac**)

Area % Report : C:\EZChrom Elite\Enterprise\Projects\Simon Eitel\Data\10-MA096 A

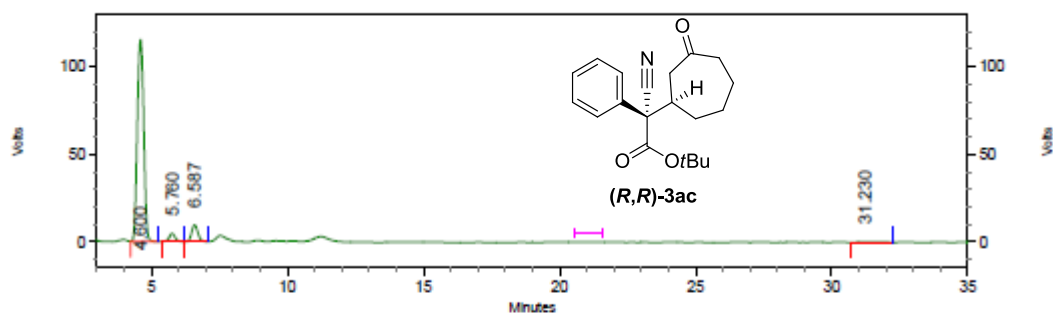

UV Results

| Retention Time | Area    | Area % |
|----------------|---------|--------|
| 4.600          | 7603170 | 89.22  |
| 5.760          | 284012  | 3.33   |
| 6.587          | 604049  | 7.09   |
| 31.230         | 30146   | 0.35   |

Area % Report : C:\EZChrom Elite\Enterprise\Projects\Simon Eitel\Data\10-MA102  
Bb\_ODH\_SE-99-1-210nm-35min-2ml.met.dat

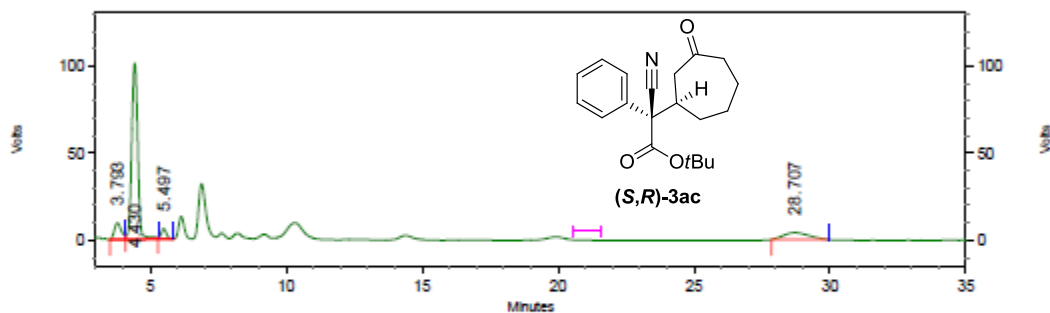

UV Results

| Retention Time | Area    | Area % |
|----------------|---------|--------|
| 3.793          | 680814  | 8.24   |
| 4.430          | 6247257 | 75.59  |
| 5.497          | 318779  | 3.86   |
| 28.707         | 1017661 | 12.31  |

Area % Report : C:\EZChrom Elite\Enterprise\Projects\Simon Eitel\Data\Old data\SEM-059  
RAC\_ODH\_sj-99-1-210nm-35min-2ml.met.dat

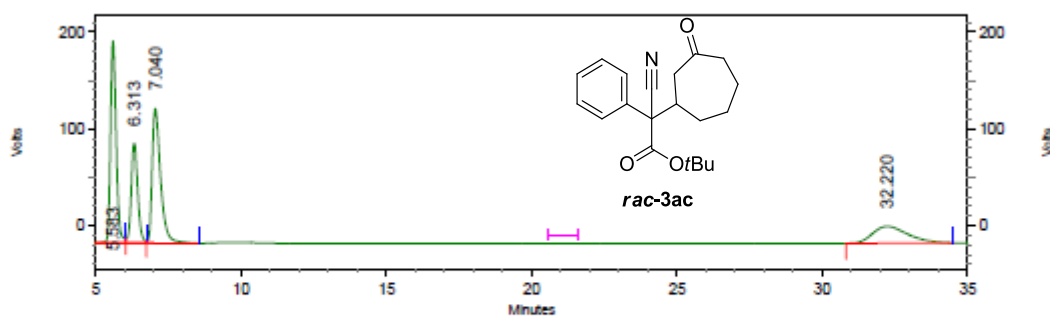

UV Results

| Retention Time | Area     | Area % |
|----------------|----------|--------|
| 5.583          | 11319143 | 32.48  |
| 6.313          | 6395375  | 18.35  |
| 7.040          | 11229829 | 32.23  |
| 32.220         | 5902239  | 16.94  |

*tert*-Butyl-2-cyano-2-(3,3-dimethyl-5-oxocyclohexyl)-2-phenylacetate (**3ad**)

Area % Report : C:\EZChrom Elite\Enterprise\Projects\Simon Eitel\Data\10-MA097 B2

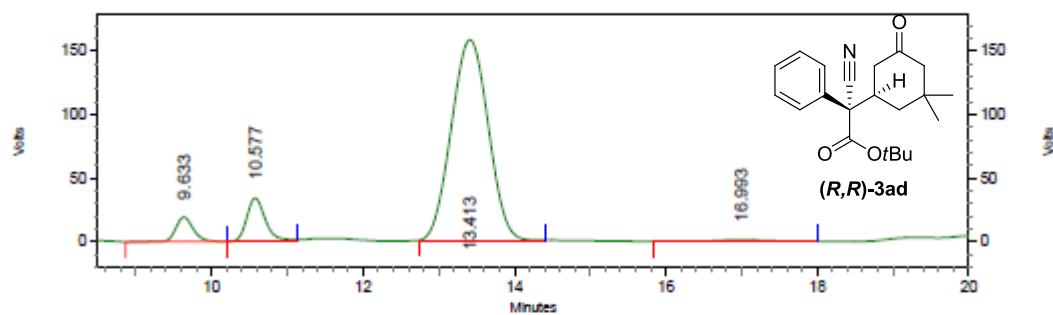

UV Results

| Retention Time | Area     | Area % |
|----------------|----------|--------|
| 9.633          | 1259958  | 5.01   |
| 10.577         | 2388653  | 9.49   |
| 13.413         | 21332820 | 84.76  |
| 16.993         | 187743   | 0.75   |

Area % Report : C:\EZChrom Elite\Enterprise\Projects\Simon Eitel\Data\10-MA090 Bb

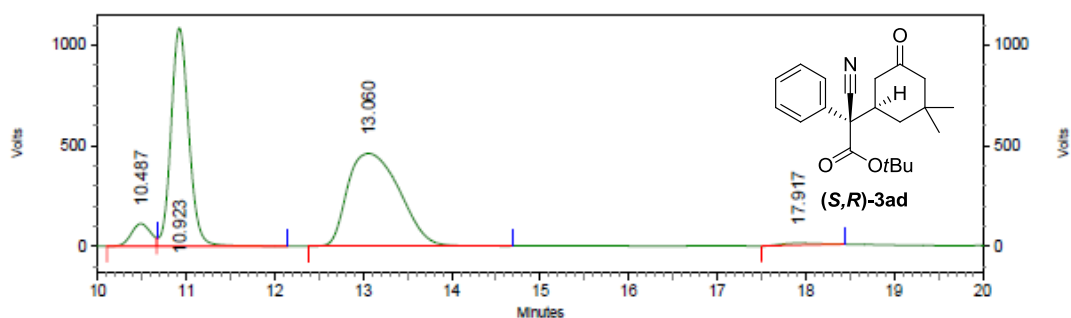

UV Results

| Retention Time | Area     | Area % |
|----------------|----------|--------|
| 10.487         | 6684733  | 4.67   |
| 10.923         | 60274531 | 42.11  |
| 13.060         | 75026155 | 52.42  |
| 17.917         | 1151214  | 0.80   |

Area % Report : C:\EZChrom Elite\Enterprise\Projects\Simon Eitel\Data\MA new\10-MA017rac-2

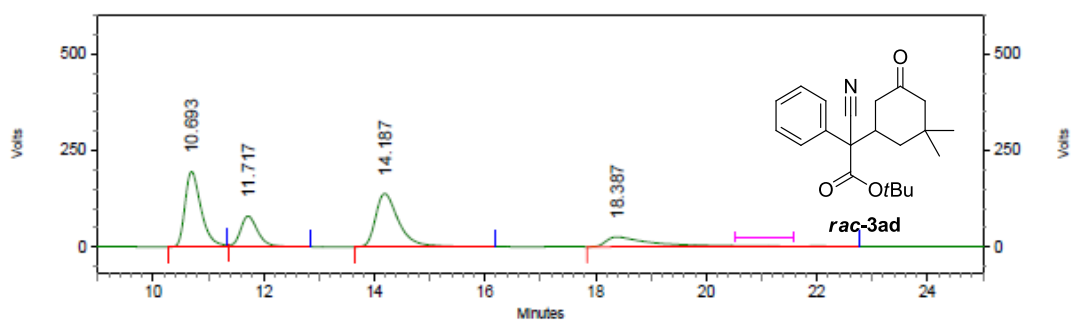

UV Results

| Retention Time | Area     | Area % |
|----------------|----------|--------|
| 10.693         | 15859681 | 35.24  |
| 11.717         | 6895738  | 15.32  |
| 14.187         | 16031721 | 35.63  |
| 18.387         | 6211357  | 13.80  |

*tert*-Butyl-2-cyano-2-(4-chlorophenyl)-2-(3,3-dimethyl-5-oxocyclohexyl)acetate (**3hd**)

Area % Report : C:\EZChrom Elite\Enterprise\Projects\Simon Eitel\Data\10-MA121-HD\_ODH\_SE-99-1-210nm-60min-0.7flow.met.dat

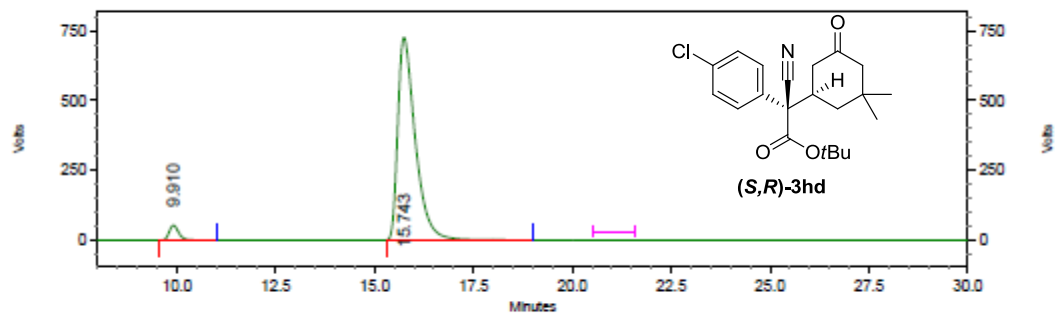

UV Results

| Retention Time | Area     | Area % |
|----------------|----------|--------|
| 9.910          | 3675498  | 3.95   |
| 15.743         | 89354722 | 96.05  |

Area % Report : C:\EZChrom Elite\Enterprise\Projects\Simon Eitel\Data\MA new\10-MA122rac A

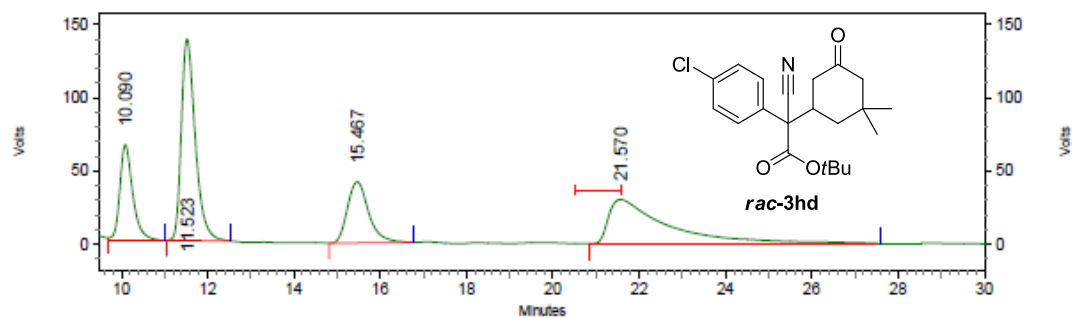

UV Results

| Retention Time | Area     | Area % |
|----------------|----------|--------|
| 10.090         | 5466964  | 15.60  |
| 11.523         | 12351420 | 35.25  |
| 15.467         | 5707721  | 16.29  |
| 21.570         | 11514968 | 32.86  |

*tert*-Butyl-2-cyano-2-(4-bromophenyl)-2-(3,3-dimethyl-5-oxocyclohexyl)acetate (**3id**)

Area % Report : C:\EZChrom Elite\Enterprise\Projects\Simon Eitel\Data\10-MA169-5-10

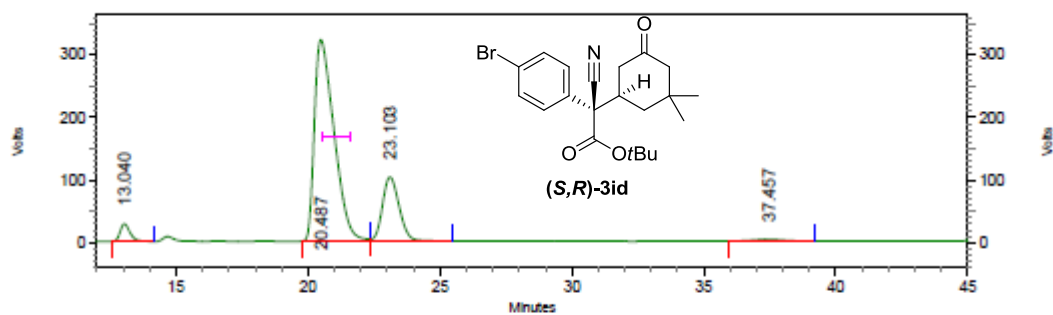

UV Results

| Retention Time | Area     | Area % |
|----------------|----------|--------|
| 13.040         | 2970154  | 3.36   |
| 20.487         | 66524529 | 75.30  |
| 23.103         | 18031655 | 20.41  |
| 37.457         | 815737   | 0.92   |

Area % Report : C:\EZChrom Elite\Enterprise\Projects\Simon Eitel\Data\racemic products\10-MA304rac\_ODH\_SE-99-1-210nm-60min-0.7flow.met.dat

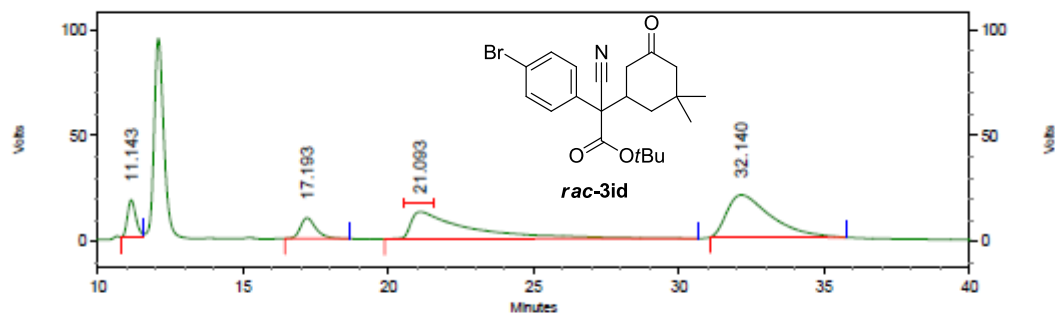

UV Results

| Retention Time | Area    | Area % |
|----------------|---------|--------|
| 11.143         | 1440273 | 7.73   |
| 17.193         | 1456323 | 7.82   |
| 21.093         | 7277670 | 39.07  |
| 32.140         | 8451243 | 45.37  |

*tert*-Butyl-2-cyano-2-(3-oxo-2,3-dihydro-1*H*-inden-1-yl)-2-phenylacetate (**3ae**)

Data File: C:\EZChrom Elite\Enterprise\Projects\Simon Eitel\Data\MA new\10-MA392c

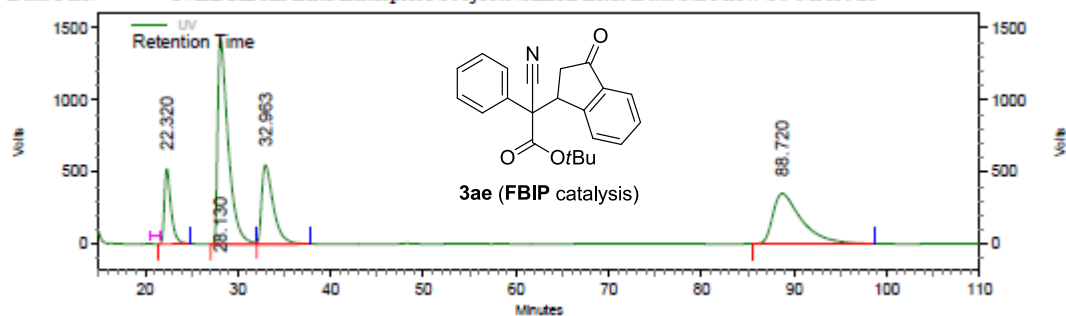

UV Results

| Retention Time | Height  | Area      | Area % |
|----------------|---------|-----------|--------|
| 22.320         | 2086262 | 103803905 | 9.95   |
| 28.130         | 5687697 | 449619745 | 43.08  |
| 32.963         | 2193092 | 190422925 | 18.24  |
| 88.720         | 1392940 | 299929136 | 28.74  |

Data File: C:\EZChrom Elite\Enterprise\Projects\Simon Eitel\Data\MA new\10-MA393a

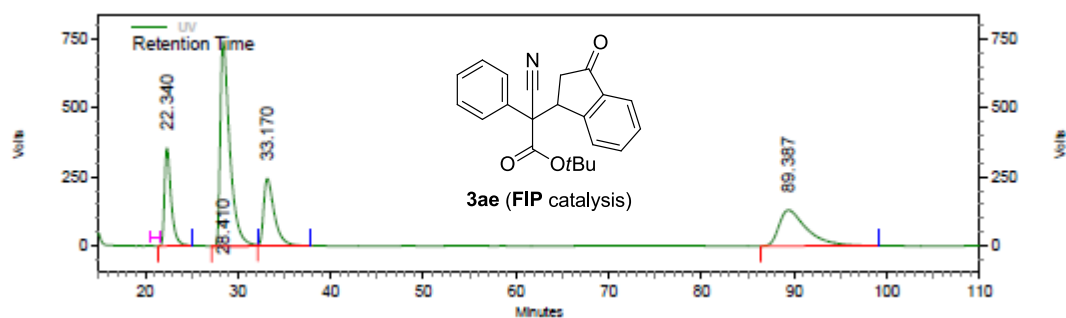

UV Results

| Retention Time | Height  | Area      | Area % |
|----------------|---------|-----------|--------|
| 22.340         | 1419474 | 70419618  | 15.03  |
| 28.410         | 2966712 | 211254865 | 45.09  |
| 33.170         | 974763  | 78077641  | 16.66  |
| 89.387         | 519599  | 108804666 | 23.22  |

Data File: C:\EZChrom Elite\Enterprise\Projects\Simon Eitel\Data\racemic products\10-MA374rac\_ADH\_SE-99-1-210nm-120min-1.5flow.met.dat

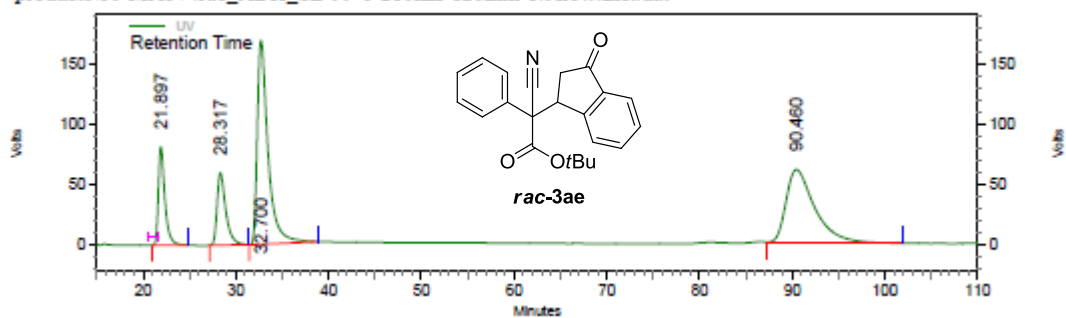

UV Results

| Retention Time | Height | Area     | Area % |
|----------------|--------|----------|--------|
| 21.897         | 327178 | 16034409 | 11.46  |
| 28.317         | 240888 | 15753964 | 11.26  |
| 32.700         | 677894 | 54813166 | 39.17  |
| 90.460         | 245289 | 53342303 | 38.12  |

### Ethyl-2-cyano-2-(3-oxocyclohexyl)-2-phenylacetate (**3a'a**)

Area % Report : C:\EZChrom Elite\Enterprise\Projects\Simon Eitel\Data\Old data\SEM-057\_OdH\_sj-99-1-210nm-32min-2ml.met.dat

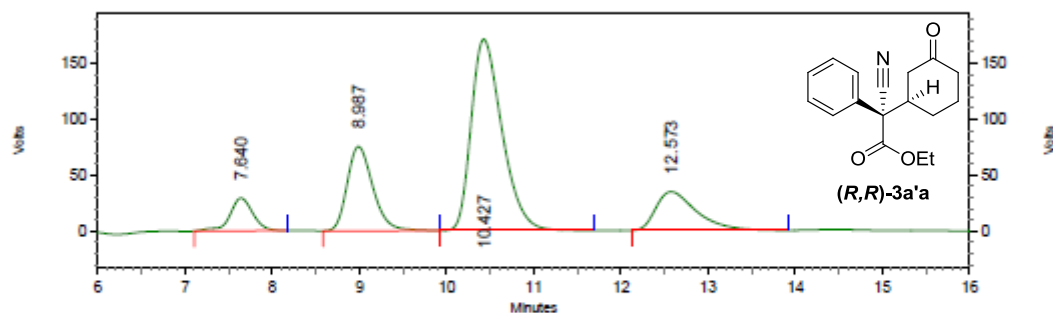

#### UV Results

| Retention Time | Area     | Area % |
|----------------|----------|--------|
| 7.640          | 2146215  | 7.26   |
| 8.987          | 6166033  | 20.86  |
| 10.427         | 16798762 | 56.83  |
| 12.573         | 4449943  | 15.05  |

Area % Report : C:\EZChrom Elite\Enterprise\Projects\Simon Eitel\Data\10-MA089 Gb

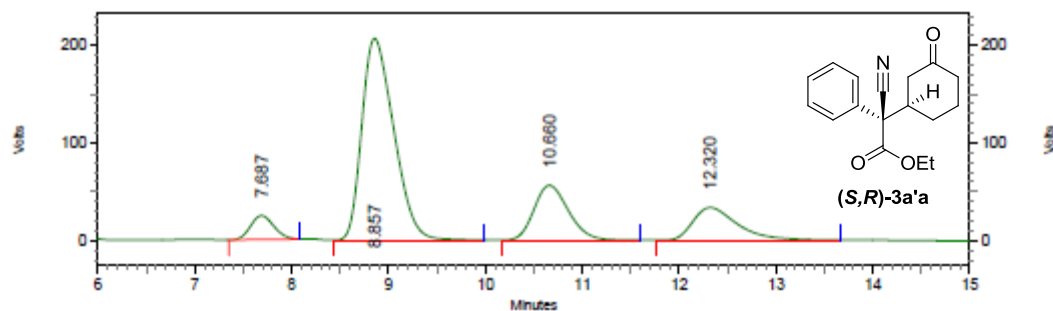

#### UV Results

| Retention Time | Area     | Area % |
|----------------|----------|--------|
| 7.687          | 1647990  | 5.42   |
| 8.857          | 18949213 | 62.32  |
| 10.660         | 5532241  | 18.20  |
| 12.320         | 4275531  | 14.06  |

Area % Report : C:\EZChrom Elite\Enterprise\Projects\Simon Eitel\Data\Old data\SEM-058 RAC\_ODH\_sj-99-1-210nm-35min-2ml.met.dat

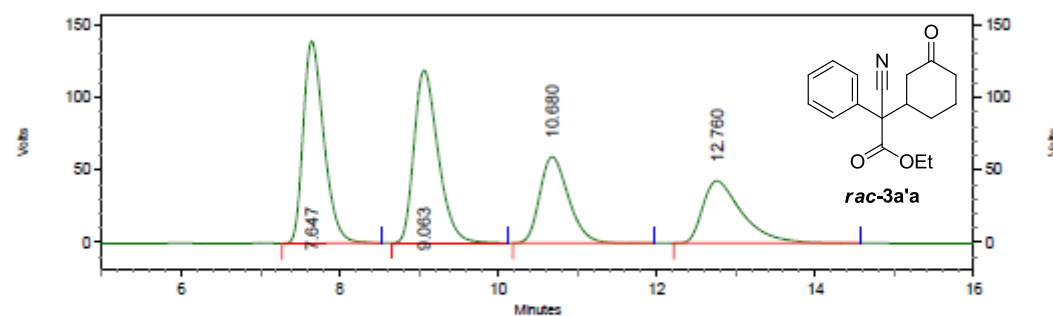

#### UV Results

| Retention Time | Area     | Area % |
|----------------|----------|--------|
| 7.647          | 10112042 | 31.40  |
| 9.063          | 10115934 | 31.41  |
| 10.680         | 6011446  | 18.67  |
| 12.760         | 5966729  | 18.53  |



*tert*-Butyl-2-cyano-2-(3-hydroxycyclohexyl)-2-(4-methoxyphenyl)-acetate (**6ma**)

Area % Report : C:\EZChrom Elite\Enterprise\Projects\Simon Eitel\Data\10-MA131  
A\_ODH\_SE-97-3-210nm-90min-1flow.met.dat

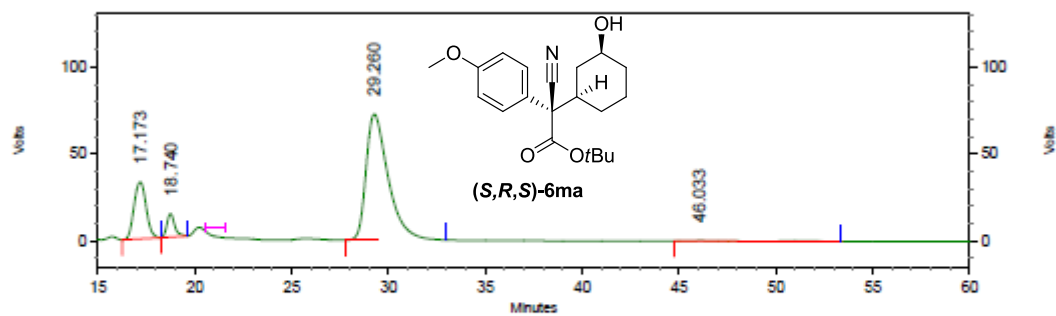

UV Results

| Retention Time | Area     | Area % |
|----------------|----------|--------|
| 17.173         | 5689478  | 18.69  |
| 18.740         | 1507434  | 4.95   |
| 29.260         | 23016431 | 75.61  |
| 46.033         | 226685   | 0.74   |

Area % Report : C:\EZChrom Elite\Enterprise\Projects\Simon Eitel\Data\racemic products\10-MA068  
rac-2\_ODH\_SE-97-3-210nm-90min-1flow.met.dat

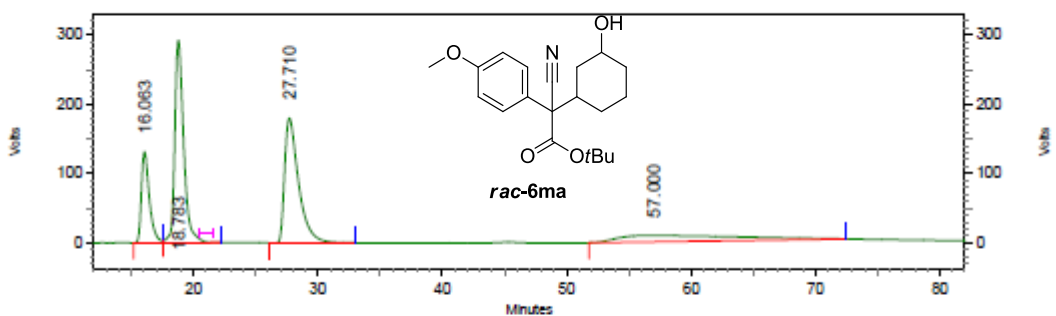

UV Results

| Retention Time | Area     | Area % |
|----------------|----------|--------|
| 16.063         | 23389625 | 14.37  |
| 18.783         | 58116902 | 35.70  |
| 27.710         | 56150704 | 34.49  |
| 57.000         | 25135385 | 15.44  |
